# Supplementary material for: The Long Non-Coding RNA Gene AC027288.3 Plays a Role in Human Endometrial Stromal Fibroblast Decidualization
Source: Cells. 2024 May 2;13(9):778. doi: 10.3390/cells13090778 (PMC11083667; doi:10.3390/cells13090778)
Supplement: Supplementary file 1 [file cells-13-00778-s001.zip › cells-2969671 - Supplemental Tables.xlsx]

## Sheet: S1
Gene stable ID	HGNC symbol	Log2FC(EPC vs VEH)	FDR
ENSG00000121410	A1BG	0.133353	0.861508
ENSG00000175899	A2M	-0.25977	0.0863143
ENSG00000128274	A4GALT	1.06286	3.64917e-15
ENSG00000094914	AAAS	0.00932873	0.97632
ENSG00000081760	AACS	-0.176082	0.261836
ENSG00000114771	AADAC	3.82394	0.000273908
ENSG00000204518	AADACL4	2.57458	2.00988e-09
ENSG00000109576	AADAT	-0.0710947	0.836472
ENSG00000103591	AAGAB	-0.0264357	0.916145
ENSG00000115977	AAK1	-0.0428216	0.850762
ENSG00000087884	AAMDC	0.0582069	0.843998
ENSG00000127837	AAMP	-0.124181	0.469423
ENSG00000129673	AANAT	0.0269289	0.989013
ENSG00000131043	AAR2	0.0460031	0.843697
ENSG00000205002	AARD	1.22118	0.0526759
ENSG00000090861	AARS1	-0.284214	0.0362013
ENSG00000124608	AARS2	-0.166512	0.4808
ENSG00000157426	AASDH	0.170724	0.531424
ENSG00000149313	AASDHPPT	0.225719	0.149464
ENSG00000008311	AASS	0.314458	0.0223429
ENSG00000275700	AATF	-0.00025564	0.999432
ENSG00000181409	AATK	0.0279157	0.975452
ENSG00000183044	ABAT	0.743202	5.90936e-05
ENSG00000165029	ABCA1	0.407487	0.000726324
ENSG00000154263	ABCA10	-0.642934	0.132652
ENSG00000144452	ABCA12	-2.35997	0.00553557
ENSG00000179869	ABCA13	-1.38892	0.0465477
ENSG00000107331	ABCA2	0.0240232	0.922135
ENSG00000167972	ABCA3	0.61244	0.0111325
ENSG00000198691	ABCA4	2.03202	1.12116e-10
ENSG00000154265	ABCA5	0.151348	0.622857
ENSG00000154262	ABCA6	1.97547	1.64016e-50
ENSG00000064687	ABCA7	0.411492	0.0950142
ENSG00000141338	ABCA8	3.58341	7.4935e-161
ENSG00000154258	ABCA9	1.049	1.13599e-16
ENSG00000085563	ABCB1	-1.06713	0.12409
ENSG00000135776	ABCB10	0.109965	0.64588
ENSG00000005471	ABCB4	-1.21575	0.120583
ENSG00000004846	ABCB5	-1.33546	0.0276744
ENSG00000115657	ABCB6	0.300863	0.506228
ENSG00000131269	ABCB7	0.0758962	0.786921
ENSG00000197150	ABCB8	-0.00859759	0.976804
ENSG00000150967	ABCB9	-0.0946587	0.758098
ENSG00000103222	ABCC1	-0.100626	0.617432
ENSG00000124574	ABCC10	0.0146534	0.957452
ENSG00000121270	ABCC11	0.0184173	0.993963
ENSG00000023839	ABCC2	-0.0671761	0.924103
ENSG00000108846	ABCC3	0.435507	0.000261465
ENSG00000125257	ABCC4	-0.749632	1.25321e-11
ENSG00000114770	ABCC5	0.168492	0.37753
ENSG00000091262	ABCC6	0.657571	0.454542
ENSG00000069431	ABCC9	1.2845	2.23116e-23
ENSG00000101986	ABCD1	0.122877	0.538125
ENSG00000173208	ABCD2	0.646563	0.344607
ENSG00000117528	ABCD3	0.270342	0.0536496
ENSG00000119688	ABCD4	-0.0760978	0.761614
ENSG00000164163	ABCE1	-0.139948	0.404524
ENSG00000204574	ABCF1	-0.06612	0.754555
ENSG00000033050	ABCF2	-0.0981518	0.679123
ENSG00000161204	ABCF3	0.0209014	0.936418
ENSG00000160179	ABCG1	0.998052	4.74131e-07
ENSG00000118777	ABCG2	-0.689726	0.0154831
ENSG00000172350	ABCG4	0.248238	0.631264
ENSG00000144827	ABHD10	0.0381797	0.906621
ENSG00000106077	ABHD11	-0.431582	0.0797981
ENSG00000100997	ABHD12	-0.197465	0.179211
ENSG00000139826	ABHD13	0.208095	0.287703
ENSG00000248487	ABHD14A	0.431991	0.0391121
ENSG00000114779	ABHD14B	0.0324398	0.903641
ENSG00000168792	ABHD15	0.271862	0.126257
ENSG00000183260	ABHD16B	0.607823	0.37896
ENSG00000129968	ABHD17A	0.0205153	0.941362
ENSG00000107362	ABHD17B	-0.124119	0.61459
ENSG00000136379	ABHD17C	0.189779	0.341344
ENSG00000164074	ABHD18	0.00607825	0.990455
ENSG00000140526	ABHD2	-0.292341	0.0214564
ENSG00000158201	ABHD3	0.118929	0.740461
ENSG00000100439	ABHD4	-0.36745	0.00230007
ENSG00000011198	ABHD5	0.837605	7.53201e-12
ENSG00000163686	ABHD6	-0.0906889	0.765337
ENSG00000127220	ABHD8	0.120005	0.596246
ENSG00000136754	ABI1	-0.10221	0.584973
ENSG00000138443	ABI2	-0.117193	0.503589
ENSG00000108798	ABI3	-1.7542	0.0244524
ENSG00000154175	ABI3BP	0.465712	0.0242659
ENSG00000119328	ABITRAM	0.300185	0.124178
ENSG00000097007	ABL1	0.423586	0.000614307
ENSG00000143322	ABL2	-0.665179	2.01888e-09
ENSG00000099204	ABLIM1	0.705083	3.12521e-09
ENSG00000163995	ABLIM2	1.79586	0.00617919
ENSG00000173210	ABLIM3	-0.301978	0.0167478
ENSG00000159842	ABR	-0.17233	0.358435
ENSG00000146386	ABRACL	-0.103134	0.698508
ENSG00000163322	ABRAXAS1	0.140585	0.541562
ENSG00000165660	ABRAXAS2	0.0548069	0.832603
ENSG00000146109	ABT1	-0.0346619	0.907177
ENSG00000114626	ABTB1	-0.00558763	0.988517
ENSG00000166016	ABTB2	0.815734	9.26619e-10
ENSG00000151136	ABTB3	-0.21861	0.786535
ENSG00000284874	AC000093.1	-0.450249	0.365287
ENSG00000268533	AC003002.2	0.100456	0.909062
ENSG00000282936	AC004706.4	-0.24985	0.463225
ENSG00000159239	AC005041.1	0.0806415	0.944817
ENSG00000258653	AC005520.1	-0.530618	0.667389
ENSG00000264324	AC006030.1	0.431439	0.478241
ENSG00000243696	AC006254.1	0.418963	0.556104
ENSG00000268655	AC008687.4	-2.15367	0.00411591
ENSG00000260729	AC009690.1	-0.836056	0.26334
ENSG00000258311	AC009779.3	-0.258555	0.58536
ENSG00000269476	AC010326.2	0.84241	0.0470567
ENSG00000258674	AC011448.1	-0.0877551	0.955574
ENSG00000258461	AC012651.1	0.427721	0.570581
ENSG00000173867	AC013489.1	-0.621043	0.40971
ENSG00000284526	AC015802.6	0.534484	0.459542
ENSG00000273398	AC017083.3	-0.0561782	0.937871
ENSG00000275778	AC018630.2	-0.194702	0.794146
ENSG00000269825	AC022150.4	-0.348839	0.248418
ENSG00000272410	AC022384.1	0.544092	0.671617
ENSG00000272916	AC022400.6	0.120917	0.862014
ENSG00000276418	AC036214.3	1.27993	0.131999
ENSG00000261884	AC040162.1	-1.69752	0.0115273
ENSG00000250644	AC068580.4	-0.27685	0.784899
ENSG00000284946	AC068831.7	-1.60226	0.00242169
ENSG00000258539	AC068896.1	0.857049	0.457682
ENSG00000284691	AC073111.5	-0.282343	0.323191
ENSG00000272822	AC073610.3	0.350133	0.724119
ENSG00000265690	AC074143.1	-0.23121	0.837857
ENSG00000241962	AC079447.1	0.435955	0.598047
ENSG00000267127	AC090360.1	-0.0749577	0.934556
ENSG00000285253	AC090517.4	0.610067	0.184606
ENSG00000267699	AC091551.1	-0.399789	0.682118
ENSG00000284512	AC092718.8	1.51578	0.124288
ENSG00000267561	AC093155.3	1.32869	0.0171558
ENSG00000170846	AC093323.1	0.164062	0.494535
ENSG00000285458	AC093827.5	0.395467	0.36396
ENSG00000272305	AC096887.1	0.397488	0.733022
ENSG00000283563	AC098650.1	-0.109126	0.939352
ENSG00000266302	AC098850.3	-0.600522	0.305338
ENSG00000188897	AC099489.1	0.360944	0.529388
ENSG00000284773	AC114490.3	0.78206	0.0457926
ENSG00000283782	AC116366.3	0.49128	0.434414
ENSG00000241489	AC244197.3	0.168426	0.90219
ENSG00000060971	ACAA1	-0.036025	0.883125
ENSG00000167315	ACAA2	-0.0265056	0.925096
ENSG00000278540	ACACA	-0.567328	8.93812e-07
ENSG00000076555	ACACB	0.992767	8.84764e-08
ENSG00000111271	ACAD10	-0.108366	0.692418
ENSG00000240303	ACAD11	-0.544223	0.15225
ENSG00000151498	ACAD8	-0.0594591	0.837857
ENSG00000177646	ACAD9	-0.273578	0.0623753
ENSG00000117054	ACADM	-0.0589366	0.827365
ENSG00000122971	ACADS	0.185284	0.524205
ENSG00000196177	ACADSB	0.30855	0.0954003
ENSG00000072778	ACADVL	-0.180359	0.232522
ENSG00000072818	ACAP1	0.0461492	0.942929
ENSG00000114331	ACAP2	0.0420357	0.851622
ENSG00000131584	ACAP3	-0.201838	0.210003
ENSG00000075239	ACAT1	-0.00300188	0.99361
ENSG00000120437	ACAT2	-0.832064	1.19959e-12
ENSG00000182827	ACBD3	0.149497	0.352944
ENSG00000181513	ACBD4	0.334714	0.190559
ENSG00000107897	ACBD5	-0.082102	0.728728
ENSG00000230124	ACBD6	-0.319727	0.0192722
ENSG00000176244	ACBD7	-0.567275	0.235022
ENSG00000110455	ACCS	-0.00491794	0.994427
ENSG00000102977	ACD	-0.19084	0.462729
ENSG00000159640	ACE	0.352696	0.112775
ENSG00000177076	ACER2	1.13229	3.46419e-07
ENSG00000078124	ACER3	0.722659	1.43923e-10
ENSG00000087085	ACHE	-1.07923	0.00341835
ENSG00000100813	ACIN1	-0.0671353	0.744772
ENSG00000144648	ACKR2	0.118744	0.934378
ENSG00000144476	ACKR3	2.15273	1.51155e-26
ENSG00000129048	ACKR4	-1.8652	1.64531e-10
ENSG00000131473	ACLY	0.0643643	0.771707
ENSG00000122729	ACO1	0.0498416	0.822267
ENSG00000100412	ACO2	-0.174351	0.254912
ENSG00000184227	ACOT1	0.695805	0.000682592
ENSG00000162390	ACOT11	-0.387347	0.281827
ENSG00000112304	ACOT13	-0.00161881	0.99756
ENSG00000119673	ACOT2	0.507886	0.000296313
ENSG00000177465	ACOT4	-0.478906	0.502486
ENSG00000097021	ACOT7	-0.137817	0.464241
ENSG00000101473	ACOT8	-0.0404136	0.901443
ENSG00000123130	ACOT9	-0.0926678	0.629482
ENSG00000161533	ACOX1	0.059013	0.783291
ENSG00000168306	ACOX2	0.258524	0.230341
ENSG00000087008	ACOX3	-0.0464231	0.868375
ENSG00000143727	ACP1	0.0255795	0.91827
ENSG00000134575	ACP2	0.112884	0.537709
ENSG00000014257	ACP3	0.803892	0.0227179
ENSG00000102575	ACP5	-1.5376	1.67439e-13
ENSG00000162836	ACP6	-0.00677883	0.990594
ENSG00000111644	ACRBP	0.14276	0.886131
ENSG00000103740	ACSBG1	0.820474	0.316546
ENSG00000167107	ACSF2	-0.34898	0.0383286
ENSG00000176715	ACSF3	-0.0816552	0.771516
ENSG00000151726	ACSL1	0.761773	2.65442e-12
ENSG00000123983	ACSL3	-0.17784	0.246443
ENSG00000068366	ACSL4	-0.0234292	0.924103
ENSG00000197142	ACSL5	-0.249426	0.311862
ENSG00000005187	ACSM3	-0.252963	0.761154
ENSG00000183549	ACSM5	1.24273	0.0860881
ENSG00000154930	ACSS1	-0.0358411	0.924103
ENSG00000131069	ACSS2	-0.0995768	0.640996
ENSG00000111058	ACSS3	-0.224097	0.314115
ENSG00000143632	ACTA1	-0.117588	0.930748
ENSG00000107796	ACTA2	0.412402	0.00223098
ENSG00000075624	ACTB	-0.014283	0.959047
ENSG00000169067	ACTBL2	-0.480819	0.366249
ENSG00000159251	ACTC1	-0.873307	0.000436597
ENSG00000184009	ACTG1	-0.237527	0.140362
ENSG00000163017	ACTG2	-0.34596	0.00684723
ENSG00000288649	ACTL10	0.164898	0.731633
ENSG00000136518	ACTL6A	-0.296577	0.0439092
ENSG00000188493	ACTMAP	-0.0757342	0.821051
ENSG00000072110	ACTN1	-0.261032	0.084382
ENSG00000077522	ACTN2	0.811079	0.460907
ENSG00000130402	ACTN4	-0.472779	0.000233624
ENSG00000131966	ACTR10	-0.0064149	0.981471
ENSG00000138107	ACTR1A	-0.0880737	0.654149
ENSG00000115073	ACTR1B	-0.17367	0.259663
ENSG00000138071	ACTR2	-0.171688	0.297177
ENSG00000115091	ACTR3	-0.252682	0.0802219
ENSG00000133627	ACTR3B	-0.604237	0.0133789
ENSG00000106526	ACTR3C	-0.112039	0.821381
ENSG00000101442	ACTR5	-0.236084	0.441305
ENSG00000075089	ACTR6	-0.0508297	0.876508
ENSG00000113812	ACTR8	-0.146484	0.422301
ENSG00000184378	ACTRT3	0.217416	0.475013
ENSG00000115170	ACVR1	-0.116476	0.505023
ENSG00000135503	ACVR1B	-0.0207914	0.941846
ENSG00000123612	ACVR1C	-1.29784	0.000887344
ENSG00000121989	ACVR2A	0.0585954	0.854425
ENSG00000114739	ACVR2B	0.12863	0.721892
ENSG00000139567	ACVRL1	-0.553197	0.00347573
ENSG00000243989	ACY1	-0.347722	0.342529
ENSG00000132744	ACY3	-0.395819	0.769935
ENSG00000119640	ACYP1	0.188714	0.549409
ENSG00000170634	ACYP2	0.24168	0.290498
ENSG00000267120	AD000671.2	-0.371044	0.736884
ENSG00000196839	ADA	-0.0311786	0.939792
ENSG00000093072	ADA2	-0.382777	0.0333712
ENSG00000168803	ADAL	-0.0744522	0.838922
ENSG00000137845	ADAM10	0.0511091	0.819001
ENSG00000073670	ADAM11	-0.513962	0.16128
ENSG00000148848	ADAM12	-0.880734	3.87231e-14
ENSG00000143537	ADAM15	0.270466	0.0412692
ENSG00000151694	ADAM17	0.129997	0.450574
ENSG00000135074	ADAM19	-0.77536	9.5986e-12
ENSG00000139985	ADAM21	0.206677	0.7959
ENSG00000008277	ADAM22	0.331184	0.422833
ENSG00000114948	ADAM23	-0.181562	0.39819
ENSG00000197140	ADAM32	0.0717264	0.923077
ENSG00000149451	ADAM33	0.445695	0.000128842
ENSG00000151651	ADAM8	-0.841716	0.0148459
ENSG00000168615	ADAM9	0.310287	0.0199325
ENSG00000154734	ADAMTS1	1.84062	3.94909e-59
ENSG00000142303	ADAMTS10	-0.0596949	0.826257
ENSG00000151388	ADAMTS12	-0.498467	1.13636e-05
ENSG00000160323	ADAMTS13	-0.203393	0.604553
ENSG00000138316	ADAMTS14	-0.947243	2.37792e-05
ENSG00000166106	ADAMTS15	1.89149	6.2078e-12
ENSG00000145536	ADAMTS16	-1.68677	2.26242e-07
ENSG00000145808	ADAMTS19	-1.09529	0.000558968
ENSG00000087116	ADAMTS2	0.501593	4.38725e-05
ENSG00000156140	ADAMTS3	0.0894515	0.83281
ENSG00000158859	ADAMTS4	-0.0413084	0.87055
ENSG00000154736	ADAMTS5	0.103002	0.581339
ENSG00000049192	ADAMTS6	0.347695	0.00988918
ENSG00000136378	ADAMTS7	-0.0588239	0.783885
ENSG00000134917	ADAMTS8	2.14737	4.26947e-07
ENSG00000163638	ADAMTS9	1.38253	1.47608e-12
ENSG00000178031	ADAMTSL1	-0.979548	0.00111108
ENSG00000143382	ADAMTSL4	1.21362	7.34248e-15
ENSG00000185761	ADAMTSL5	-0.0818777	0.776723
ENSG00000105963	ADAP1	0.731373	0.000629858
ENSG00000184060	ADAP2	-0.840489	0.0135979
ENSG00000160710	ADAR	0.0170375	0.946555
ENSG00000197381	ADARB1	1.14742	7.15344e-26
ENSG00000065457	ADAT1	-0.269995	0.0786675
ENSG00000189007	ADAT2	-0.617499	0.0219021
ENSG00000213638	ADAT3	0.160593	0.672281
ENSG00000063761	ADCK1	-0.0239045	0.952458
ENSG00000133597	ADCK2	0.0363239	0.921576
ENSG00000173137	ADCK5	-0.268771	0.339917
ENSG00000164742	ADCY1	0.91244	2.24603e-05
ENSG00000143199	ADCY10	0.417359	0.738442
ENSG00000078295	ADCY2	-0.989973	0.0194975
ENSG00000138031	ADCY3	0.413201	0.0004687
ENSG00000129467	ADCY4	-1.34307	1.89118e-07
ENSG00000173175	ADCY5	-0.543975	0.0846125
ENSG00000174233	ADCY6	-0.0483176	0.827365
ENSG00000121281	ADCY7	-0.0727959	0.75292
ENSG00000155897	ADCY8	0.0955807	0.935408
ENSG00000162104	ADCY9	-0.300796	0.0182581
ENSG00000087274	ADD1	0.0738519	0.728656
ENSG00000148700	ADD3	0.404548	0.000593212
ENSG00000020181	ADGRA2	-0.566166	2.58794e-06
ENSG00000152990	ADGRA3	0.169293	0.292321
ENSG00000181790	ADGRB1	-0.76656	0.321172
ENSG00000121753	ADGRB2	-0.886866	9.69986e-12
ENSG00000135298	ADGRB3	2.1733	1.22544e-05
ENSG00000111452	ADGRD1	-0.556581	8.29937e-06
ENSG00000127507	ADGRE2	-0.453664	0.269232
ENSG00000123146	ADGRE5	-0.0600641	0.781497
ENSG00000173567	ADGRF3	0.400954	0.699438
ENSG00000153294	ADGRF4	1.25607	1.09082e-06
ENSG00000205336	ADGRG1	-0.045789	0.921489
ENSG00000112414	ADGRG6	0.686685	8.60955e-09
ENSG00000072071	ADGRL1	-0.0943558	0.723731
ENSG00000117114	ADGRL2	-0.197271	0.261508
ENSG00000150471	ADGRL3	1.60124	4.36248e-14
ENSG00000162618	ADGRL4	-0.845627	0.00120779
ENSG00000196616	ADH1B	3.20304	7.21008e-27
ENSG00000248144	ADH1C	1.60365	1.18406e-05
ENSG00000197894	ADH5	0.347227	0.0069636
ENSG00000147576	ADHFE1	0.762067	0.0578062
ENSG00000182551	ADI1	0.424611	0.000555493
ENSG00000159346	ADIPOR1	0.185029	0.210725
ENSG00000006831	ADIPOR2	-0.05104	0.811057
ENSG00000148671	ADIRF	0.196027	0.685221
ENSG00000101220	ADISSP	0.407141	0.00350427
ENSG00000156110	ADK	-0.11437	0.586526
ENSG00000148926	ADM	0.469215	0.000103414
ENSG00000128165	ADM2	-0.299353	0.022127
ENSG00000224420	ADM5	-0.178743	0.890349
ENSG00000101126	ADNP	-0.194558	0.181756
ENSG00000101544	ADNP2	-0.213502	0.225405
ENSG00000181915	ADO	-0.197484	0.192956
ENSG00000163485	ADORA1	-0.249206	0.290741
ENSG00000170425	ADORA2B	-0.564612	0.0243735
ENSG00000159322	ADPGK	0.264435	0.062074
ENSG00000144843	ADPRH	0.0285523	0.946602
ENSG00000153531	ADPRHL1	0.381204	0.138339
ENSG00000170222	ADPRM	-0.047723	0.903554
ENSG00000116863	ADPRS	-0.0642938	0.791715
ENSG00000170214	ADRA1B	1.72117	5.46952e-12
ENSG00000171873	ADRA1D	-1.11058	2.53904e-09
ENSG00000150594	ADRA2A	0.172489	0.280051
ENSG00000184160	ADRA2C	5.56555	0
ENSG00000169252	ADRB2	1.80916	3.73703e-05
ENSG00000130706	ADRM1	-0.176953	0.242999
ENSG00000239900	ADSL	-0.110129	0.72992
ENSG00000185100	ADSS1	0.0975134	0.850762
ENSG00000035687	ADSS2	-0.376829	0.00208018
ENSG00000111863	ADTRP	-1.33748	0.00123533
ENSG00000106624	AEBP1	-0.587584	8.99267e-07
ENSG00000139154	AEBP2	-0.27482	0.070592
ENSG00000181026	AEN	-0.573217	6.96946e-07
ENSG00000196526	AFAP1	0.143625	0.417328
ENSG00000157510	AFAP1L1	-0.461305	0.00311442
ENSG00000169129	AFAP1L2	-2.3417	1.84316e-59
ENSG00000130396	AFDN	-0.0985763	0.625385
ENSG00000172493	AFF1	0.188474	0.202679
ENSG00000155966	AFF2	-0.483092	0.736567
ENSG00000144218	AFF3	-0.759705	1.29846e-10
ENSG00000072364	AFF4	-0.00961909	0.971337
ENSG00000135537	AFG1L	0.170692	0.639891
ENSG00000141385	AFG3L2	-0.0705625	0.733827
ENSG00000183077	AFMID	-0.092864	0.761262
ENSG00000081051	AFP	-0.152836	0.901863
ENSG00000119844	AFTPH	0.0868189	0.708063
ENSG00000038002	AGA	0.229338	0.178355
ENSG00000157985	AGAP1	-0.2112	0.184499
ENSG00000135439	AGAP2	0.0908958	0.864567
ENSG00000133612	AGAP3	-0.204811	0.160233
ENSG00000188234	AGAP4	-0.22928	0.718158
ENSG00000172650	AGAP5	-0.731301	0.323585
ENSG00000204149	AGAP6	0.81948	0.307252
ENSG00000204172	AGAP9	-0.207216	0.678505
ENSG00000165923	AGBL2	0.409749	0.456811
ENSG00000146856	AGBL3	0.589491	0.261445
ENSG00000084693	AGBL5	-0.142496	0.473774
ENSG00000204305	AGER	0.204425	0.750919
ENSG00000173744	AGFG1	-0.038824	0.864567
ENSG00000106351	AGFG2	0.850916	2.01123e-07
ENSG00000164252	AGGF1	-0.000763712	0.998675
ENSG00000006530	AGK	-0.0857491	0.788687
ENSG00000162688	AGL	0.375495	0.00946256
ENSG00000116771	AGMAT	-0.396343	0.198418
ENSG00000092847	AGO1	-0.0931476	0.628238
ENSG00000123908	AGO2	-0.156499	0.326817
ENSG00000126070	AGO3	0.163943	0.369724
ENSG00000134698	AGO4	-0.0524638	0.848054
ENSG00000204310	AGPAT1	0.284188	0.112775
ENSG00000169692	AGPAT2	0.271361	0.0513969
ENSG00000160216	AGPAT3	-0.179505	0.249494
ENSG00000026652	AGPAT4	0.161986	0.380409
ENSG00000155189	AGPAT5	-0.17456	0.467858
ENSG00000018510	AGPS	0.0799305	0.688693
ENSG00000188157	AGRN	-0.125636	0.494524
ENSG00000135744	AGT	-1.16412	2.8542e-05
ENSG00000135049	AGTPBP1	0.69316	0.000162467
ENSG00000144891	AGTR1	0.324889	0.653877
ENSG00000177674	AGTRAP	0.402335	0.00814357
ENSG00000153207	AHCTF1	0.0610759	0.801537
ENSG00000101444	AHCY	-0.0537452	0.802124
ENSG00000168710	AHCYL1	0.0846793	0.668968
ENSG00000158467	AHCYL2	-0.204698	0.323811
ENSG00000126705	AHDC1	-0.395548	0.0011705
ENSG00000135541	AHI1	0.410984	0.00648502
ENSG00000124942	AHNAK	-0.0470633	0.84993
ENSG00000185567	AHNAK2	-0.159774	0.328746
ENSG00000106546	AHR	-0.0312287	0.921383
ENSG00000063438	AHRR	-0.736724	0.134573
ENSG00000100591	AHSA1	0.00109248	0.997969
ENSG00000186063	AIDA	0.0136035	0.960654
ENSG00000126878	AIF1L	0.787146	0.206761
ENSG00000156709	AIFM1	-0.0588263	0.810357
ENSG00000042286	AIFM2	0.0627386	0.801537
ENSG00000183773	AIFM3	-0.207527	0.745648
ENSG00000146416	AIG1	0.0325869	0.906978
ENSG00000164022	AIMP1	-0.200063	0.187795
ENSG00000106305	AIMP2	0.0248636	0.928871
ENSG00000110711	AIP	-0.0242181	0.926357
ENSG00000196581	AJAP1	-0.0572371	0.925535
ENSG00000232434	AJM1	0.249968	0.353229
ENSG00000129474	AJUBA	-0.609493	3.03142e-08
ENSG00000106992	AK1	0.246972	0.249517
ENSG00000004455	AK2	-0.0455966	0.838152
ENSG00000147853	AK3	0.415677	0.000424317
ENSG00000162433	AK4	0.985931	0.000725286
ENSG00000233381	AK4P3	-0.0827628	0.933947
ENSG00000154027	AK5	-1.32468	5.27478e-28
ENSG00000085231	AK6	-0.213818	0.540231
ENSG00000140057	AK7	1.32692	0.0529034
ENSG00000165695	AK8	0.595855	0.265589
ENSG00000155085	AK9	0.210921	0.572403
ENSG00000121057	AKAP1	-0.0397913	0.897441
ENSG00000108599	AKAP10	0.0761217	0.733827
ENSG00000023516	AKAP11	-0.0178628	0.942334
ENSG00000131016	AKAP12	0.171851	0.312825
ENSG00000170776	AKAP13	0.458153	0.000158097
ENSG00000111254	AKAP3	0.098087	0.904853
ENSG00000179841	AKAP5	0.424111	0.0885753
ENSG00000151320	AKAP6	-0.70077	0.0203764
ENSG00000118507	AKAP7	0.28689	0.388017
ENSG00000105127	AKAP8	-0.0438858	0.869964
ENSG00000011243	AKAP8L	-0.0981621	0.632042
ENSG00000127914	AKAP9	0.148328	0.371341
ENSG00000166452	AKIP1	-0.156091	0.366965
ENSG00000174574	AKIRIN1	0.00139308	0.997435
ENSG00000135334	AKIRIN2	0.0487738	0.834211
ENSG00000106948	AKNA	-0.436472	0.000502752
ENSG00000162641	AKNAD1	-0.140875	0.862108
ENSG00000117448	AKR1A1	0.083884	0.668407
ENSG00000085662	AKR1B1	-0.0700926	0.729803
ENSG00000198074	AKR1B10	0.301934	0.598649
ENSG00000187134	AKR1C1	1.16235	9.88018e-10
ENSG00000151632	AKR1C2	0.813738	0.00322845
ENSG00000196139	AKR1C3	0.599995	0.0366876
ENSG00000165568	AKR1E2	-0.338367	0.347185
ENSG00000053371	AKR7A2	-0.0690792	0.751666
ENSG00000162482	AKR7A3	0.24331	0.752697
ENSG00000211454	AKR7L	-0.527522	0.6038
ENSG00000142208	AKT1	-0.0676097	0.749268
ENSG00000204673	AKT1S1	-0.111991	0.524938
ENSG00000105221	AKT2	-0.0402419	0.85926
ENSG00000117020	AKT3	-0.158232	0.463396
ENSG00000166971	AKTIP	0.17831	0.441339
ENSG00000284431	AL022238.4	0.194708	0.804973
ENSG00000261732	AL031708.1	-0.128288	0.933947
ENSG00000282988	AL031777.3	0.294176	0.658735
ENSG00000256566	AL049650.1	-0.601102	0.483131
ENSG00000258466	AL049779.1	-0.595893	0.328702
ENSG00000258790	AL121594.1	0.839054	0.465682
ENSG00000261582	AL121753.1	-0.141198	0.794011
ENSG00000273154	AL121845.3	-0.31829	0.543699
ENSG00000259529	AL136295.5	-0.280737	0.719147
ENSG00000257524	AL157935.2	0.427446	0.502297
ENSG00000285269	AL160269.1	0.0780517	0.898076
ENSG00000187186	AL162231.1	0.173005	0.826936
ENSG00000285444	AL162377.3	-0.886576	0.15346
ENSG00000285130	AL358113.1	-0.408213	0.694452
ENSG00000124593	AL365205.1	0.575432	0.210003
ENSG00000273088	AL713999.1	0.195331	0.862258
ENSG00000148218	ALAD	0.326067	0.0133936
ENSG00000023330	ALAS1	0.046633	0.837488
ENSG00000170017	ALCAM	-0.263056	0.0475938
ENSG00000161618	ALDH16A1	0.0944067	0.710043
ENSG00000059573	ALDH18A1	0.381029	0.00171207
ENSG00000165092	ALDH1A1	1.87978	5.98987e-57
ENSG00000128918	ALDH1A2	-0.0484809	0.845953
ENSG00000184254	ALDH1A3	-0.198051	0.572427
ENSG00000137124	ALDH1B1	-0.522516	5.76261e-06
ENSG00000144908	ALDH1L1	1.9931	2.14462e-07
ENSG00000136010	ALDH1L2	0.237743	0.100063
ENSG00000111275	ALDH2	1.58326	3.39137e-48
ENSG00000072210	ALDH3A2	0.361409	0.00732268
ENSG00000006534	ALDH3B1	0.804633	6.02049e-13
ENSG00000159423	ALDH4A1	-0.0959534	0.682118
ENSG00000112294	ALDH5A1	0.209339	0.374183
ENSG00000119711	ALDH6A1	0.40645	0.00749767
ENSG00000164904	ALDH7A1	-0.0858735	0.660911
ENSG00000118514	ALDH8A1	1.18828	0.00887127
ENSG00000143149	ALDH9A1	-0.0784053	0.687833
ENSG00000285043	ALDOA	-0.469707	0.179714
ENSG00000149925	ALDOA	-0.0987609	0.716123
ENSG00000109107	ALDOC	-0.252177	0.288849
ENSG00000033011	ALG1	0.109892	0.574835
ENSG00000139133	ALG10	0.11506	0.791226
ENSG00000175548	ALG10B	0.272843	0.300546
ENSG00000253710	ALG11	0.35363	0.0844708
ENSG00000182858	ALG12	0.0175053	0.950469
ENSG00000101901	ALG13	-0.0687643	0.790494
ENSG00000172339	ALG14	-0.0471149	0.884042
ENSG00000119523	ALG2	0.282223	0.0359139
ENSG00000214160	ALG3	0.456168	0.000565388
ENSG00000120697	ALG5	0.213182	0.195037
ENSG00000088035	ALG6	0.0557393	0.883595
ENSG00000159063	ALG8	0.0439712	0.866628
ENSG00000086848	ALG9	0.386423	0.0564581
ENSG00000196711	ALKAL1	-2.40219	8.63683e-05
ENSG00000189292	ALKAL2	0.10078	0.931683
ENSG00000100601	ALKBH1	0.0391362	0.915313
ENSG00000189046	ALKBH2	-0.0324881	0.93379
ENSG00000166199	ALKBH3	-0.113127	0.638704
ENSG00000160993	ALKBH4	-0.111463	0.700811
ENSG00000091542	ALKBH5	0.152575	0.347136
ENSG00000239382	ALKBH6	0.0109088	0.990076
ENSG00000125652	ALKBH7	0.332011	0.029213
ENSG00000137760	ALKBH8	-0.248265	0.314129
ENSG00000116127	ALMS1	-0.166145	0.416157
ENSG00000108839	ALOX12	-0.275787	0.846738
ENSG00000132965	ALOX5AP	2.61097	1.18374e-22
ENSG00000179148	ALOXE3	0.19027	0.806249
ENSG00000073331	ALPK1	-0.114371	0.668504
ENSG00000198796	ALPK2	0.197535	0.181726
ENSG00000136383	ALPK3	-0.158381	0.789833
ENSG00000162551	ALPL	-0.225765	0.642537
ENSG00000003393	ALS2	-0.423098	0.00106251
ENSG00000178038	ALS2CL	-0.772967	0.00161789
ENSG00000156150	ALX3	-0.542588	0.675412
ENSG00000183684	ALYREF	-0.331271	0.0107744
ENSG00000242110	AMACR	0.347997	0.564974
ENSG00000106927	AMBP	0.803066	0.120491
ENSG00000110497	AMBRA1	-0.204843	0.201851
ENSG00000123505	AMD1	0.154709	0.339929
ENSG00000139344	AMDHD1	1.15117	0.178465
ENSG00000162066	AMDHD2	-0.759934	4.17161e-06
ENSG00000184675	AMER1	-0.21345	0.446735
ENSG00000159461	AMFR	0.208052	0.156671
ENSG00000104899	AMH	0.0718264	0.93791
ENSG00000181754	AMIGO1	0.206751	0.390997
ENSG00000139211	AMIGO2	-0.621665	6.7642e-08
ENSG00000101935	AMMECR1	0.0328108	0.898136
ENSG00000144233	AMMECR1L	0.108508	0.558564
ENSG00000166126	AMN	0.661174	0.492125
ENSG00000151743	AMN1	0.0685518	0.872983
ENSG00000126016	AMOT	-0.17705	0.378775
ENSG00000166025	AMOTL1	-0.518387	5.14205e-06
ENSG00000114019	AMOTL2	0.0634614	0.766079
ENSG00000116337	AMPD2	-0.0334741	0.883514
ENSG00000133805	AMPD3	0.117695	0.516107
ENSG00000078053	AMPH	-0.427344	0.034649
ENSG00000145020	AMT	0.551489	0.594828
ENSG00000240038	AMY2B	0.539766	0.382516
ENSG00000174945	AMZ1	0.286836	0.087831
ENSG00000196704	AMZ2	-0.125946	0.479676
ENSG00000153107	ANAPC1	-0.148871	0.504915
ENSG00000164162	ANAPC10	0.114318	0.78585
ENSG00000141552	ANAPC11	-0.0510283	0.823604
ENSG00000129055	ANAPC13	0.124843	0.479425
ENSG00000110200	ANAPC15	-0.0555811	0.824161
ENSG00000166295	ANAPC16	0.305128	0.0184911
ENSG00000176248	ANAPC2	0.00749169	0.981604
ENSG00000053900	ANAPC4	0.0455936	0.880992
ENSG00000089053	ANAPC5	0.0212686	0.930845
ENSG00000196510	ANAPC7	-0.143354	0.449142
ENSG00000214274	ANG	1.1342	2.39026e-07
ENSG00000013523	ANGEL1	-0.033418	0.91751
ENSG00000174606	ANGEL2	-0.00940662	0.976645
ENSG00000154188	ANGPT1	1.3373	9.6741e-34
ENSG00000091879	ANGPT2	3.02801	3.0731e-10
ENSG00000116194	ANGPTL1	2.29632	2.42703e-13
ENSG00000136859	ANGPTL2	-0.257822	0.0576176
ENSG00000167772	ANGPTL4	0.772904	4.98278e-05
ENSG00000130812	ANGPTL6	0.0643538	0.937414
ENSG00000029534	ANK1	-0.501401	0.133911
ENSG00000145362	ANK2	-0.432721	0.0017771
ENSG00000151150	ANK3	-0.682939	0.021434
ENSG00000151687	ANKAR	0.421772	0.198352
ENSG00000166839	ANKDD1A	0.196245	0.536523
ENSG00000189045	ANKDD1B	1.14747	0.0214228
ENSG00000132623	ANKEF1	0.202588	0.676369
ENSG00000185722	ANKFY1	0.092708	0.620136
ENSG00000154122	ANKH	0.583864	6.5624e-07
ENSG00000131503	ANKHD1	-0.0184528	0.974325
ENSG00000254996	ANKHD1-EIF4EBP3	0.223573	0.796619
ENSG00000001629	ANKIB1	-0.0623026	0.76255
ENSG00000160117	ANKLE1	0.564271	0.198411
ENSG00000176915	ANKLE2	-0.0743042	0.711701
ENSG00000144504	ANKMY1	-0.102681	0.786258
ENSG00000106524	ANKMY2	-0.284683	0.123027
ENSG00000164331	ANKRA2	0.147861	0.548385
ENSG00000148677	ANKRD1	-0.196559	0.702565
ENSG00000088448	ANKRD10	0.274393	0.0700169
ENSG00000167522	ANKRD11	-0.19806	0.197259
ENSG00000101745	ANKRD12	-0.248116	0.125701
ENSG00000076513	ANKRD13A	-0.344671	0.00593343
ENSG00000198720	ANKRD13B	-0.0416083	0.905988
ENSG00000118454	ANKRD13C	-0.0186389	0.944464
ENSG00000172932	ANKRD13D	-0.173899	0.388094
ENSG00000134461	ANKRD16	-0.163904	0.629536
ENSG00000132466	ANKRD17	-0.00434903	0.989043
ENSG00000230453	ANKRD18B	-1.45023	0.0383131
ENSG00000165887	ANKRD2	-0.150108	0.877725
ENSG00000163126	ANKRD23	0.0637208	0.907261
ENSG00000089847	ANKRD24	0.0820074	0.898076
ENSG00000107890	ANKRD26	-0.0246329	0.942999
ENSG00000105186	ANKRD27	0.0290918	0.912783
ENSG00000206560	ANKRD28	-0.275941	0.0340437
ENSG00000154065	ANKRD29	0.760509	0.0575569
ENSG00000148513	ANKRD30A	0.285477	0.70165
ENSG00000180777	ANKRD30B	-1.11173	0.0143297
ENSG00000145700	ANKRD31	-0.00231035	0.998953
ENSG00000164236	ANKRD33B	0.781796	6.49673e-09
ENSG00000272031	ANKRD34A	-1.02765	3.54287e-08
ENSG00000198483	ANKRD35	0.0894964	0.794774
ENSG00000135976	ANKRD36	0.0798036	0.874029
ENSG00000196912	ANKRD36B	-0.310174	0.492787
ENSG00000174501	ANKRD36C	-0.288775	0.360168
ENSG00000186352	ANKRD37	0.629709	0.0131726
ENSG00000213337	ANKRD39	0.0037268	0.996263
ENSG00000154945	ANKRD40	-0.169641	0.272161
ENSG00000137494	ANKRD42	0.0935056	0.731949
ENSG00000065413	ANKRD44	0.334593	0.201071
ENSG00000183831	ANKRD45	1.43615	0.0398967
ENSG00000186106	ANKRD46	0.0292777	0.941666
ENSG00000168876	ANKRD49	0.0301181	0.937701
ENSG00000151458	ANKRD50	0.391855	0.00113131
ENSG00000139645	ANKRD52	-0.220396	0.120919
ENSG00000144031	ANKRD53	-0.191565	0.680513
ENSG00000100124	ANKRD54	0.150233	0.487606
ENSG00000135299	ANKRD6	-0.151879	0.81561
ENSG00000157999	ANKRD61	-0.719073	0.314077
ENSG00000235098	ANKRD65	-0.084663	0.862275
ENSG00000106013	ANKRD7	1.0606	0.081471
ENSG00000156381	ANKRD9	-0.0730832	0.773143
ENSG00000064999	ANKS1A	0.310565	0.0337739
ENSG00000185046	ANKS1B	0.757309	0.480077
ENSG00000168096	ANKS3	0.0555297	0.856547
ENSG00000165138	ANKS6	-0.0754286	0.75124
ENSG00000163516	ANKZF1	-0.0212091	0.948337
ENSG00000011426	ANLN	-0.99098	1.99312e-11
ENSG00000131620	ANO1	-2.59273	3.76503e-38
ENSG00000160746	ANO10	-0.157782	0.322953
ENSG00000047617	ANO2	-1.62626	0.0185563
ENSG00000134343	ANO3	2.01979	1.80828e-06
ENSG00000151572	ANO4	0.208245	0.335185
ENSG00000177119	ANO6	-0.309428	0.0175652
ENSG00000146205	ANO7	-0.299803	0.465875
ENSG00000074855	ANO8	0.15045	0.597345
ENSG00000011201	ANOS1	-0.935791	3.35843e-12
ENSG00000140350	ANP32A	-0.167135	0.286438
ENSG00000136938	ANP32B	-0.168233	0.291779
ENSG00000143401	ANP32E	-0.382889	0.00497799
ENSG00000166825	ANPEP	0.0394619	0.861218
ENSG00000103254	ANTKMT	0.00378249	0.994941
ENSG00000169604	ANTXR1	0.909343	2.34171e-14
ENSG00000163297	ANTXR2	0.277912	0.046416
ENSG00000135046	ANXA1	0.109264	0.56961
ENSG00000109511	ANXA10	0.774536	0.462437
ENSG00000122359	ANXA11	-0.132238	0.452545
ENSG00000104537	ANXA13	3.41671	8.98435e-30
ENSG00000182718	ANXA2	-0.30667	0.0292868
ENSG00000177721	ANXA2R	0.273275	0.534538
ENSG00000138772	ANXA3	-1.02493	4.36877e-09
ENSG00000196975	ANXA4	-0.100004	0.591842
ENSG00000164111	ANXA5	-0.397317	0.00256329
ENSG00000197043	ANXA6	-0.053746	0.817668
ENSG00000138279	ANXA7	-0.203249	0.158159
ENSG00000143412	ANXA9	-0.153299	0.804631
ENSG00000131480	AOC2	0.0936453	0.873191
ENSG00000131471	AOC3	1.64139	1.64118e-07
ENSG00000148120	AOPEP	0.168677	0.288493
ENSG00000138356	AOX1	0.295691	0.034494
ENSG00000255508	AP002990.1	-0.467856	0.175814
ENSG00000256591	AP003108.2	0.387517	0.626964
ENSG00000138660	AP1AR	-0.0906056	0.73685
ENSG00000100280	AP1B1	-0.176332	0.243747
ENSG00000166747	AP1G1	0.03237	0.888695
ENSG00000213983	AP1G2	-0.129044	0.697008
ENSG00000072958	AP1M1	0.153275	0.338697
ENSG00000129354	AP1M2	-0.929957	9.60665e-05
ENSG00000106367	AP1S1	-0.328811	0.00891525
ENSG00000182287	AP1S2	0.0137438	0.960877
ENSG00000152056	AP1S3	-0.243735	0.578668
ENSG00000196961	AP2A1	-0.0308145	0.898718
ENSG00000183020	AP2A2	-0.176041	0.26456
ENSG00000006125	AP2B1	-0.0890391	0.658272
ENSG00000161203	AP2M1	-0.0727059	0.737564
ENSG00000042753	AP2S1	-0.0958834	0.610828
ENSG00000132842	AP3B1	0.0512222	0.8109
ENSG00000103723	AP3B2	1.04949	0.00649468
ENSG00000065000	AP3D1	-0.178481	0.262445
ENSG00000185009	AP3M1	0.162476	0.310857
ENSG00000070718	AP3M2	-0.705677	3.14177e-07
ENSG00000177879	AP3S1	0.0220889	0.929358
ENSG00000157823	AP3S2	0.259669	0.109408
ENSG00000134262	AP4B1	-0.150194	0.583208
ENSG00000081014	AP4E1	-0.00857461	0.978342
ENSG00000221838	AP4M1	-0.12865	0.556157
ENSG00000100478	AP4S1	-0.182391	0.504495
ENSG00000254470	AP5B1	0.0627853	0.798358
ENSG00000053770	AP5M1	0.0149258	0.955304
ENSG00000125843	AP5S1	0.0110403	0.973694
ENSG00000242802	AP5Z1	-0.244926	0.0828794
ENSG00000120868	APAF1	-0.034842	0.890423
ENSG00000107282	APBA1	-0.533151	0.0154831
ENSG00000034053	APBA2	-0.511309	0.0295733
ENSG00000011132	APBA3	-0.106428	0.667389
ENSG00000166313	APBB1	0.0310879	0.896595
ENSG00000077420	APBB1IP	-0.0553655	0.847883
ENSG00000163697	APBB2	0.38194	0.00152875
ENSG00000113108	APBB3	-0.0050902	0.994734
ENSG00000134982	APC	-0.140821	0.438862
ENSG00000115266	APC2	0.0936205	0.849598
ENSG00000154856	APCDD1	0.943541	0.000399101
ENSG00000198768	APCDD1L	-1.05264	2.56421e-12
ENSG00000164062	APEH	-0.0651549	0.755662
ENSG00000100823	APEX1	-0.289746	0.0254124
ENSG00000169188	APEX2	-0.074794	0.787934
ENSG00000117362	APH1A	-0.0661712	0.744505
ENSG00000138613	APH1B	0.0389052	0.885586
ENSG00000166181	API5	0.0646563	0.751948
ENSG00000149089	APIP	-0.0681266	0.832265
ENSG00000169621	APLF	-0.127999	0.723191
ENSG00000171388	APLN	-1.76465	0.000649941
ENSG00000105290	APLP1	-0.0549442	0.878289
ENSG00000084234	APLP2	0.0455095	0.850816
ENSG00000101474	APMAP	0.303974	0.016855
ENSG00000084674	APOB	3.055	7.40629e-13
ENSG00000179750	APOBEC3B	-2.05978	2.3917e-10
ENSG00000244509	APOBEC3C	-0.133449	0.42484
ENSG00000243811	APOBEC3D	0.022059	0.976355
ENSG00000128394	APOBEC3F	-0.136142	0.639131
ENSG00000239713	APOBEC3G	-0.186545	0.536512
ENSG00000184730	APOBR	-0.493612	0.585468
ENSG00000130208	APOC1	-0.416269	0.291347
ENSG00000189058	APOD	1.85486	1.6621e-26
ENSG00000130203	APOE	-0.345951	0.0767188
ENSG00000100342	APOL1	0.384436	0.00159456
ENSG00000128335	APOL2	0.25182	0.0622589
ENSG00000128284	APOL3	-0.0593768	0.843985
ENSG00000100336	APOL4	1.94885	0.000137509
ENSG00000221963	APOL6	0.504261	1.73359e-05
ENSG00000178878	APOLD1	-0.805998	7.18169e-07
ENSG00000204444	APOM	0.0608761	0.926357
ENSG00000184831	APOO	0.269132	0.291084
ENSG00000155008	APOOL	-0.0287252	0.916559
ENSG00000142192	APP	-0.118293	0.548107
ENSG00000062725	APPBP2	0.290439	0.0250993
ENSG00000157500	APPL1	0.144156	0.445091
ENSG00000136044	APPL2	-0.38218	0.00140192
ENSG00000198931	APRT	-0.0667662	0.752587
ENSG00000137074	APTX	-0.0892266	0.699013
ENSG00000240583	AQP1	-1.49722	6.54643e-08
ENSG00000178301	AQP11	-0.230226	0.585889
ENSG00000165272	AQP3	-0.452826	0.187326
ENSG00000103375	AQP8	3.10371	0.000295065
ENSG00000021776	AQR	-0.00939295	0.971947
ENSG00000169083	AR	0.121376	0.485764
ENSG00000078061	ARAF	0.157736	0.327476
ENSG00000186635	ARAP1	0.00270903	0.994682
ENSG00000047365	ARAP2	-0.726061	0.0132508
ENSG00000120318	ARAP3	-0.346377	0.0603334
ENSG00000198576	ARC	0.465766	0.640409
ENSG00000095139	ARCN1	0.110366	0.563596
ENSG00000109321	AREG	-0.329326	0.72879
ENSG00000119682	AREL1	0.0234471	0.924545
ENSG00000143761	ARF1	0.109126	0.574941
ENSG00000134287	ARF3	-0.155253	0.338653
ENSG00000168374	ARF4	0.147829	0.402954
ENSG00000004059	ARF5	-0.155443	0.330798
ENSG00000165527	ARF6	-0.380621	0.00172647
ENSG00000101199	ARFGAP1	0.0320737	0.889133
ENSG00000149182	ARFGAP2	-0.103443	0.581641
ENSG00000242247	ARFGAP3	0.106351	0.555332
ENSG00000066777	ARFGEF1	-0.0671851	0.747257
ENSG00000124198	ARFGEF2	-0.0139067	0.955304
ENSG00000112379	ARFGEF3	-0.129829	0.912025
ENSG00000164144	ARFIP1	0.12721	0.472183
ENSG00000132254	ARFIP2	0.0649953	0.759009
ENSG00000101246	ARFRP1	-0.183114	0.302585
ENSG00000081181	ARG2	0.36106	0.233442
ENSG00000134884	ARGLU1	-0.153966	0.348365
ENSG00000175220	ARHGAP1	-0.323808	0.0141482
ENSG00000071205	ARHGAP10	-0.457362	0.000594685
ENSG00000198826	ARHGAP11A	-0.642624	0.11954
ENSG00000288864	ARHGAP11A-SCG5	0.576411	0.50887
ENSG00000165322	ARHGAP12	0.29901	0.0435094
ENSG00000140750	ARHGAP17	-0.263272	0.0525533
ENSG00000146376	ARHGAP18	-0.603768	1.95589e-06
ENSG00000213390	ARHGAP19	-0.564137	0.00682399
ENSG00000137727	ARHGAP20	0.407742	0.00537468
ENSG00000107863	ARHGAP21	0.204365	0.159351
ENSG00000128805	ARHGAP22	-0.976653	9.80305e-14
ENSG00000275832	ARHGAP23	-0.382329	0.0018748
ENSG00000138639	ARHGAP24	0.150333	0.428499
ENSG00000163219	ARHGAP25	-1.86881	2.49723e-14
ENSG00000145819	ARHGAP26	-0.414448	0.0209851
ENSG00000159314	ARHGAP27	-1.1856	0.00198596
ENSG00000088756	ARHGAP28	1.77083	1.89542e-31
ENSG00000137962	ARHGAP29	-0.0807531	0.680901
ENSG00000031081	ARHGAP31	-0.117752	0.497283
ENSG00000134909	ARHGAP32	0.00292909	0.995435
ENSG00000004777	ARHGAP33	-0.616352	0.0428448
ENSG00000160007	ARHGAP35	-0.0919804	0.636198
ENSG00000147799	ARHGAP39	-0.2363	0.367038
ENSG00000089820	ARHGAP4	-0.318339	0.414237
ENSG00000165895	ARHGAP42	-0.335205	0.0775667
ENSG00000006740	ARHGAP44	0.298353	0.389486
ENSG00000180448	ARHGAP45	-0.407087	0.517622
ENSG00000100852	ARHGAP5	0.428707	0.000238869
ENSG00000047648	ARHGAP6	0.991812	1.41915e-07
ENSG00000123329	ARHGAP9	-0.745053	0.067093
ENSG00000141522	ARHGDIA	-0.29904	0.0283017
ENSG00000111348	ARHGDIB	-0.924657	1.57109e-08
ENSG00000076928	ARHGEF1	-0.0402964	0.859902
ENSG00000074964	ARHGEF10L	-0.15064	0.509603
ENSG00000132694	ARHGEF11	-0.0595219	0.778084
ENSG00000196914	ARHGEF12	-0.196178	0.208574
ENSG00000130762	ARHGEF16	-0.411955	0.431639
ENSG00000110237	ARHGEF17	-0.141434	0.417456
ENSG00000104880	ARHGEF18	-0.00692819	0.980084
ENSG00000142632	ARHGEF19	1.29045	5.95477e-19
ENSG00000116584	ARHGEF2	-0.705607	8.20883e-10
ENSG00000240771	ARHGEF25	0.162316	0.377617
ENSG00000114790	ARHGEF26	0.937299	0.0459912
ENSG00000214944	ARHGEF28	-0.36616	0.00923661
ENSG00000163947	ARHGEF3	0.153583	0.675467
ENSG00000214694	ARHGEF33	0.294066	0.521961
ENSG00000213214	ARHGEF35	-0.441927	0.205006
ENSG00000183111	ARHGEF37	0.429986	0.151513
ENSG00000137135	ARHGEF39	0.241793	0.6038
ENSG00000165801	ARHGEF40	-0.880666	2.30918e-16
ENSG00000050327	ARHGEF5	-0.541658	0.0129877
ENSG00000129675	ARHGEF6	-0.357801	0.0433141
ENSG00000102606	ARHGEF7	0.148636	0.355404
ENSG00000131089	ARHGEF9	-0.119724	0.645253
ENSG00000117713	ARID1A	-0.307977	0.0143788
ENSG00000049618	ARID1B	-0.0678327	0.737625
ENSG00000189079	ARID2	-0.0713073	0.751009
ENSG00000116017	ARID3A	-0.0638992	0.77911
ENSG00000179361	ARID3B	0.145137	0.765337
ENSG00000205143	ARID3C	-0.156218	0.829495
ENSG00000032219	ARID4A	0.0234178	0.937202
ENSG00000054267	ARID4B	0.159485	0.344134
ENSG00000196843	ARID5A	-0.494021	6.74896e-05
ENSG00000150347	ARID5B	-0.168359	0.318181
ENSG00000166233	ARIH1	0.13939	0.396138
ENSG00000177479	ARIH2	-0.0313232	0.892806
ENSG00000120805	ARL1	0.0844555	0.662018
ENSG00000175414	ARL10	-0.551892	1.96268e-06
ENSG00000169379	ARL13B	0.13168	0.63373
ENSG00000152219	ARL14EP	0.022255	0.941627
ENSG00000185305	ARL15	-0.352412	0.016033
ENSG00000214087	ARL16	-0.119312	0.611591
ENSG00000185829	ARL17A	-0.259334	0.762896
ENSG00000228696	ARL17B	0.561738	0.469423
ENSG00000213465	ARL2	-0.110001	0.63185
ENSG00000102931	ARL2BP	0.471759	3.46404e-05
ENSG00000138175	ARL3	0.255965	0.0715824
ENSG00000122644	ARL4A	-0.0347486	0.936774
ENSG00000188042	ARL4C	-2.10992	2.27652e-81
ENSG00000175906	ARL4D	0.778506	7.54387e-10
ENSG00000162980	ARL5A	0.207314	0.218463
ENSG00000165997	ARL5B	0.272115	0.0690517
ENSG00000113966	ARL6	0.358253	0.112108
ENSG00000170540	ARL6IP1	-0.102157	0.580186
ENSG00000144746	ARL6IP5	0.432235	0.000282532
ENSG00000177917	ARL6IP6	0.164129	0.501224
ENSG00000143862	ARL8A	0.0897114	0.647819
ENSG00000134108	ARL8B	0.116213	0.503589
ENSG00000196503	ARL9	-0.295633	0.571171
ENSG00000104442	ARMC1	-0.011818	0.963746
ENSG00000170632	ARMC10	-0.163874	0.540534
ENSG00000157343	ARMC12	1.04957	0.00743166
ENSG00000118690	ARMC2	0.424208	0.175155
ENSG00000140691	ARMC5	-0.0290976	0.930765
ENSG00000105676	ARMC6	-0.174045	0.361742
ENSG00000125449	ARMC7	-0.0677799	0.834031
ENSG00000114098	ARMC8	0.326975	0.0185364
ENSG00000135931	ARMC9	-0.426751	0.000338273
ENSG00000126947	ARMCX1	-0.0284372	0.913695
ENSG00000184867	ARMCX2	0.152648	0.341661
ENSG00000102401	ARMCX3	0.308571	0.0148337
ENSG00000196440	ARMCX4	-0.310837	0.0849446
ENSG00000125962	ARMCX5	-0.257207	0.338976
ENSG00000198960	ARMCX6	-0.283862	0.133
ENSG00000198520	ARMH1	0.479374	0.36371
ENSG00000120029	ARMH3	-0.00470074	0.989163
ENSG00000139971	ARMH4	-0.108952	0.629536
ENSG00000146476	ARMT1	0.529121	1.4252e-05
ENSG00000143437	ARNT	0.248012	0.0685698
ENSG00000172379	ARNT2	-0.11761	0.503779
ENSG00000241685	ARPC1A	-0.042821	0.856437
ENSG00000130429	ARPC1B	-0.0169158	0.965833
ENSG00000163466	ARPC2	-0.195561	0.217071
ENSG00000111229	ARPC3	-0.0883384	0.643225
ENSG00000241553	ARPC4	-0.179732	0.239668
ENSG00000162704	ARPC5	-0.00723448	0.979869
ENSG00000136950	ARPC5L	-0.266638	0.0707403
ENSG00000242498	ARPIN	-0.262942	0.0893212
ENSG00000128989	ARPP19	0.119821	0.496233
ENSG00000137486	ARRB1	-0.28761	0.0457972
ENSG00000141480	ARRB2	0.00611927	0.991606
ENSG00000197070	ARRDC1	0.0998168	0.762939
ENSG00000105643	ARRDC2	0.341707	0.0977019
ENSG00000113369	ARRDC3	0.34169	0.00707001
ENSG00000140450	ARRDC4	0.19035	0.355374
ENSG00000100299	ARSA	0.357868	0.00421764
ENSG00000113273	ARSB	0.395922	0.0009949
ENSG00000006756	ARSD	0.206546	0.206503
ENSG00000141337	ARSG	0.818018	2.83168e-05
ENSG00000183876	ARSI	-0.948775	5.96848e-11
ENSG00000180801	ARSJ	-0.966227	4.41303e-19
ENSG00000164291	ARSK	0.236547	0.236154
ENSG00000157399	ARSL	0.580082	0.00462967
ENSG00000156219	ART3	0.304022	0.737625
ENSG00000167311	ART5	-1.43394	0.00240764
ENSG00000117407	ARTN	0.968476	0.132417
ENSG00000173409	ARV1	0.194779	0.416157
ENSG00000099889	ARVCF	-0.447228	0.028781
ENSG00000214435	AS3MT	-0.130012	0.92991
ENSG00000104763	ASAH1	0.545947	1.0249e-06
ENSG00000188611	ASAH2	-0.499212	0.538125
ENSG00000204147	ASAH2B	-0.0946327	0.820066
ENSG00000153317	ASAP1	-0.215152	0.146415
ENSG00000151693	ASAP2	-0.49318	1.46825e-05
ENSG00000088280	ASAP3	-0.0115545	0.962812
ENSG00000065802	ASB1	-0.0708374	0.732592
ENSG00000196372	ASB13	0.0624996	0.850762
ENSG00000239388	ASB14	0.239744	0.787833
ENSG00000161664	ASB16	0.261765	0.753248
ENSG00000100628	ASB2	0.441832	0.430085
ENSG00000115239	ASB3	-0.100909	0.688693
ENSG00000164122	ASB5	0.557745	0.386115
ENSG00000148331	ASB6	-0.17298	0.335678
ENSG00000183475	ASB7	0.0563504	0.83103
ENSG00000177981	ASB8	-0.01512	0.957221
ENSG00000138303	ASCC1	0.0734087	0.756795
ENSG00000100325	ASCC2	-0.167194	0.294475
ENSG00000112249	ASCC3	-0.0538053	0.801044
ENSG00000183734	ASCL2	0.261185	0.776752
ENSG00000111875	ASF1A	-0.217771	0.278467
ENSG00000105011	ASF1B	-1.72001	6.79273e-13
ENSG00000141505	ASGR1	-1.26793	0.000350519
ENSG00000116539	ASH1L	0.0894096	0.638959
ENSG00000129691	ASH2L	-0.110499	0.550105
ENSG00000110881	ASIC1	0.238165	0.280051
ENSG00000213199	ASIC3	0.539951	0.198576
ENSG00000072182	ASIC4	-0.52347	0.674484
ENSG00000101440	ASIP	1.52734	0.0240592
ENSG00000126522	ASL	0.0654417	0.837672
ENSG00000070669	ASNS	-0.340571	0.358404
ENSG00000138381	ASNSD1	0.263894	0.14645
ENSG00000108381	ASPA	0.120799	0.87212
ENSG00000198363	ASPH	-0.0875026	0.673026
ENSG00000174939	ASPHD1	0.515208	0.00796485
ENSG00000128203	ASPHD2	-0.255497	0.492125
ENSG00000066279	ASPM	-0.248605	0.390102
ENSG00000106819	ASPN	-0.469111	0.000121574
ENSG00000169696	ASPSCR1	-0.0936349	0.7068
ENSG00000162174	ASRGL1	0.0171946	0.982629
ENSG00000130707	ASS1	0.573557	9.38175e-07
ENSG00000034533	ASTE1	-0.322858	0.210276
ENSG00000148219	ASTN2	-0.958696	2.86236e-08
ENSG00000171456	ASXL1	-0.0933358	0.618331
ENSG00000143970	ASXL2	-0.0347721	0.881382
ENSG00000141431	ASXL3	-1.641	6.00081e-05
ENSG00000154438	ASZ1	1.36215	0.156697
ENSG00000138138	ATAD1	0.167968	0.286949
ENSG00000156802	ATAD2	-0.474868	0.00514703
ENSG00000119778	ATAD2B	-0.164653	0.519544
ENSG00000197785	ATAD3A	-0.0881931	0.692117
ENSG00000160072	ATAD3B	-0.291438	0.176719
ENSG00000215915	ATAD3C	-0.129029	0.840999
ENSG00000176208	ATAD5	-1.01799	0.000762692
ENSG00000137343	ATAT1	-0.277207	0.355374
ENSG00000167654	ATCAY	-1.11287	0.0176491
ENSG00000107669	ATE1	-0.0510512	0.838056
ENSG00000123268	ATF1	0.0260372	0.934378
ENSG00000115966	ATF2	-0.0348041	0.882779
ENSG00000162772	ATF3	-1.49111	1.90065e-29
ENSG00000128272	ATF4	-0.140307	0.433928
ENSG00000169136	ATF5	-0.712941	3.47441e-10
ENSG00000118217	ATF6	0.0365688	0.871719
ENSG00000213676	ATF6B	-0.0443328	0.864567
ENSG00000170653	ATF7	-0.125986	0.478292
ENSG00000171681	ATF7IP	0.0385879	0.864949
ENSG00000166669	ATF7IP2	-0.308719	0.378907
ENSG00000152348	ATG10	0.114644	0.75292
ENSG00000123395	ATG101	-0.0542804	0.805262
ENSG00000145782	ATG12	0.144529	0.389175
ENSG00000175224	ATG13	0.00787631	0.976534
ENSG00000126775	ATG14	-0.279019	0.0583049
ENSG00000085978	ATG16L1	0.0235464	0.932868
ENSG00000168010	ATG16L2	-0.27724	0.391298
ENSG00000110046	ATG2A	-0.070281	0.75812
ENSG00000066739	ATG2B	0.0678407	0.745477
ENSG00000144848	ATG3	-0.183134	0.23314
ENSG00000101844	ATG4A	-0.0864801	0.785896
ENSG00000168397	ATG4B	-0.0802217	0.697778
ENSG00000125703	ATG4C	0.154146	0.605008
ENSG00000130734	ATG4D	-0.0250872	0.942909
ENSG00000057663	ATG5	0.151278	0.424538
ENSG00000197548	ATG7	-0.272395	0.0916507
ENSG00000198925	ATG9A	0.0891398	0.651572
ENSG00000138363	ATIC	-0.13726	0.411351
ENSG00000198513	ATL1	0.514055	0.00372061
ENSG00000119787	ATL2	0.590551	1.29259e-05
ENSG00000184743	ATL3	0.203326	0.171879
ENSG00000149311	ATM	0.039212	0.861509
ENSG00000166454	ATMIN	-0.0272003	0.910654
ENSG00000111676	ATN1	-0.00138125	0.997435
ENSG00000179774	ATOH7	-0.640565	0.553328
ENSG00000168874	ATOH8	1.21647	2.87162e-23
ENSG00000047346	ATOSA	0.0537356	0.842301
ENSG00000005238	ATOSB	-0.0515653	0.816249
ENSG00000177556	ATOX1	-0.150086	0.407293
ENSG00000206190	ATP10A	-0.854318	3.11483e-08
ENSG00000145246	ATP10D	-0.499159	1.60877e-05
ENSG00000068650	ATP11A	0.0151702	0.957893
ENSG00000058063	ATP11B	0.142447	0.391909
ENSG00000101974	ATP11C	-0.137046	0.424787
ENSG00000105726	ATP13A1	0.0581761	0.78813
ENSG00000159363	ATP13A2	0.0205597	0.936501
ENSG00000133657	ATP13A3	-0.190881	0.193738
ENSG00000163399	ATP1A1	-0.102716	0.594978
ENSG00000018625	ATP1A2	1.98542	8.16633e-09
ENSG00000143153	ATP1B1	-0.0352864	0.904736
ENSG00000129244	ATP1B2	0.95997	0.168626
ENSG00000069849	ATP1B3	0.173602	0.27185
ENSG00000166896	ATP23	-0.0562564	0.92889
ENSG00000196296	ATP2A1	0.373799	0.481608
ENSG00000174437	ATP2A2	0.124689	0.508256
ENSG00000074370	ATP2A3	0.476899	0.165256
ENSG00000070961	ATP2B1	-0.869054	1.30695e-15
ENSG00000067842	ATP2B3	0.57056	0.386496
ENSG00000058668	ATP2B4	-0.0250799	0.924589
ENSG00000017260	ATP2C1	-0.329455	0.0102818
ENSG00000152234	ATP5F1A	-0.0751047	0.723147
ENSG00000110955	ATP5F1B	-0.018342	0.942999
ENSG00000165629	ATP5F1C	-0.0887407	0.639657
ENSG00000099624	ATP5F1D	-0.113257	0.533323
ENSG00000124172	ATP5F1E	0.00174165	0.99671
ENSG00000130770	ATP5IF1	0.127949	0.481878
ENSG00000159199	ATP5MC1	-0.0642913	0.80343
ENSG00000135390	ATP5MC2	-0.233013	0.0885391
ENSG00000154518	ATP5MC3	-0.0618608	0.765337
ENSG00000169020	ATP5ME	-0.104679	0.5867
ENSG00000241468	ATP5MF	-0.0254615	0.92444
ENSG00000167283	ATP5MG	0.058839	0.800755
ENSG00000156411	ATP5MJ	-0.0392541	0.869941
ENSG00000173915	ATP5MK	-0.0203052	0.935826
ENSG00000116459	ATP5PB	-0.107724	0.55045
ENSG00000167863	ATP5PD	0.00903394	0.972339
ENSG00000154723	ATP5PF	-0.0429341	0.849938
ENSG00000241837	ATP5PO	-0.119214	0.565832
ENSG00000071553	ATP6AP1	0.231103	0.10108
ENSG00000182220	ATP6AP2	0.329087	0.0104903
ENSG00000033627	ATP6V0A1	-0.0960233	0.620918
ENSG00000185344	ATP6V0A2	0.0269089	0.921717
ENSG00000117410	ATP6V0B	0.0581687	0.787833
ENSG00000185883	ATP6V0C	-0.0940004	0.935375
ENSG00000159720	ATP6V0D1	-0.157228	0.319503
ENSG00000147614	ATP6V0D2	-0.877962	0.0492502
ENSG00000113732	ATP6V0E1	0.285642	0.0294805
ENSG00000171130	ATP6V0E2	0.307571	0.135201
ENSG00000114573	ATP6V1A	-0.189826	0.199358
ENSG00000116039	ATP6V1B1	0.141686	0.800882
ENSG00000147416	ATP6V1B2	-0.314755	0.0124163
ENSG00000155097	ATP6V1C1	-0.0148947	0.952354
ENSG00000143882	ATP6V1C2	0.64407	0.109141
ENSG00000100554	ATP6V1D	-0.0706763	0.729046
ENSG00000131100	ATP6V1E1	-0.011774	0.961994
ENSG00000250565	ATP6V1E2	0.289175	0.395091
ENSG00000128524	ATP6V1F	-0.126773	0.464241
ENSG00000272899	ATP6V1FNB	0.0259261	0.962495
ENSG00000136888	ATP6V1G1	0.0977395	0.595368
ENSG00000047249	ATP6V1H	-0.111995	0.538687
ENSG00000165240	ATP7A	0.0299498	0.917231
ENSG00000123191	ATP7B	-0.0527562	0.872574
ENSG00000124406	ATP8A1	1.34407	7.95221e-05
ENSG00000132932	ATP8A2	1.08487	0.0356461
ENSG00000081923	ATP8B1	-2.30657	2.56577e-94
ENSG00000143515	ATP8B2	0.203263	0.179788
ENSG00000130270	ATP8B3	0.277982	0.366336
ENSG00000104043	ATP8B4	1.61211	1.68254e-46
ENSG00000054793	ATP9A	-0.318519	0.0113017
ENSG00000166377	ATP9B	-0.0740682	0.773988
ENSG00000123472	ATPAF1	0.140193	0.450108
ENSG00000171953	ATPAF2	-0.0634923	0.858031
ENSG00000150756	ATPSCKMT	0.0973715	0.745094
ENSG00000175054	ATR	0.0631643	0.806249
ENSG00000138085	ATRAID	0.346451	0.00492698
ENSG00000164053	ATRIP	-0.0369516	0.928511
ENSG00000088812	ATRN	0.166772	0.289876
ENSG00000107518	ATRNL1	-0.250262	0.442881
ENSG00000085224	ATRX	0.0238344	0.922198
ENSG00000124788	ATXN1	0.337709	0.00624314
ENSG00000130638	ATXN10	-0.0873377	0.650553
ENSG00000224470	ATXN1L	-0.0522456	0.810154
ENSG00000204842	ATXN2	-0.04733	0.829495
ENSG00000168488	ATXN2L	-0.335722	0.00664374
ENSG00000066427	ATXN3	-0.104071	0.672857
ENSG00000163635	ATXN7	0.175389	0.346366
ENSG00000146776	ATXN7L1	-0.162881	0.546327
ENSG00000162650	ATXN7L2	-0.213101	0.477616
ENSG00000087152	ATXN7L3	-0.0932061	0.618121
ENSG00000253719	ATXN7L3B	-0.039872	0.85926
ENSG00000148090	AUH	0.0428916	0.909363
ENSG00000127423	AUNIP	-1.1423	0.000414084
ENSG00000115307	AUP1	0.122913	0.477487
ENSG00000087586	AURKA	-0.900247	4.26971e-06
ENSG00000175756	AURKAIP1	-0.0126831	0.959897
ENSG00000178999	AURKB	-1.69015	6.60369e-10
ENSG00000105146	AURKC	-0.00692207	0.995912
ENSG00000158321	AUTS2	-0.149119	0.443276
ENSG00000169857	AVEN	-0.222446	0.118471
ENSG00000135407	AVIL	0.785529	0.00420744
ENSG00000105778	AVL9	-0.101075	0.595729
ENSG00000119986	AVPI1	0.831553	2.91543e-09
ENSG00000166148	AVPR1A	4.41235	2.66785e-11
ENSG00000103126	AXIN1	-0.175531	0.321397
ENSG00000168646	AXIN2	1.44535	9.89221e-09
ENSG00000167601	AXL	-0.418431	0.000855197
ENSG00000163512	AZI2	0.217608	0.128644
ENSG00000155096	AZIN1	-0.261018	0.0533292
ENSG00000142920	AZIN2	0.282215	0.417094
ENSG00000166710	B2M	0.11462	0.551266
ENSG00000169255	B3GALNT1	-0.488479	0.00646078
ENSG00000162885	B3GALNT2	0.513861	6.31618e-06
ENSG00000172318	B3GALT1	-1.95985	1.92262e-12
ENSG00000162630	B3GALT2	0.166229	0.647819
ENSG00000183778	B3GALT5	1.80722	3.466e-06
ENSG00000176022	B3GALT6	-0.0688698	0.742692
ENSG00000214654	B3GALT9	-0.0842964	0.848557
ENSG00000112309	B3GAT2	0.324345	0.717368
ENSG00000149541	B3GAT3	-0.0786081	0.734388
ENSG00000187676	B3GLCT	-0.080663	0.752864
ENSG00000170340	B3GNT2	0.220464	0.247437
ENSG00000176383	B3GNT4	0.0709586	0.916511
ENSG00000176597	B3GNT5	-0.14931	0.611903
ENSG00000156966	B3GNT7	0.100361	0.883595
ENSG00000177191	B3GNT8	0.341135	0.407329
ENSG00000237172	B3GNT9	-0.00730611	0.978573
ENSG00000175711	B3GNTL1	-0.612186	0.0325173
ENSG00000135454	B4GALNT1	-0.236272	0.2815
ENSG00000182272	B4GALNT4	0.187778	0.538125
ENSG00000086062	B4GALT1	0.727122	2.16747e-10
ENSG00000117411	B4GALT2	0.0851983	0.655642
ENSG00000158850	B4GALT3	0.0279909	0.918881
ENSG00000121578	B4GALT4	0.307383	0.01702
ENSG00000158470	B4GALT5	0.0775293	0.695829
ENSG00000118276	B4GALT6	-0.0441943	0.924103
ENSG00000027847	B4GALT7	0.0287002	0.919767
ENSG00000174684	B4GAT1	0.715704	1.85773e-09
ENSG00000108641	B9D1	0.360038	0.0433141
ENSG00000123810	B9D2	0.168615	0.643225
ENSG00000164929	BAALC	-1.9592	8.1386e-05
ENSG00000105393	BABAM1	-0.152638	0.492787
ENSG00000158019	BABAM2	-0.0479294	0.851264
ENSG00000186318	BACE1	0.00476028	0.988074
ENSG00000182240	BACE2	-0.154975	0.347136
ENSG00000156273	BACH1	-0.469056	7.17775e-05
ENSG00000112182	BACH2	-0.938465	0.00106251
ENSG00000002330	BAD	0.0412805	0.860615
ENSG00000107262	BAG1	-0.13374	0.505121
ENSG00000112208	BAG2	0.211431	0.136229
ENSG00000151929	BAG3	0.0422947	0.849989
ENSG00000156735	BAG4	0.120776	0.568661
ENSG00000166170	BAG5	0.0779851	0.700105
ENSG00000204463	BAG6	-0.270979	0.0391121
ENSG00000266074	BAHCC1	-0.229673	0.180559
ENSG00000140320	BAHD1	-0.217566	0.180977
ENSG00000175866	BAIAP2	-0.280846	0.125785
ENSG00000006453	BAIAP2L1	-0.763641	1.18318e-08
ENSG00000128298	BAIAP2L2	-0.651424	0.00748427
ENSG00000007516	BAIAP3	0.18509	0.769912
ENSG00000030110	BAK1	-0.274266	0.122403
ENSG00000095739	BAMBI	0.200575	0.28961
ENSG00000175334	BANF1	-0.171428	0.300137
ENSG00000153064	BANK1	-0.628275	0.097091
ENSG00000172530	BANP	-0.113164	0.665654
ENSG00000163930	BAP1	-0.149169	0.359802
ENSG00000138376	BARD1	-0.0377726	0.928871
ENSG00000131668	BARX1	1.78254	0.0182812
ENSG00000176788	BASP1	0.90606	8.46137e-16
ENSG00000168062	BATF2	-0.631062	0.0467264
ENSG00000123685	BATF3	-0.903178	0.0149737
ENSG00000087088	BAX	-0.503157	1.00622e-05
ENSG00000198604	BAZ1A	-0.143392	0.403256
ENSG00000009954	BAZ1B	-0.111091	0.540914
ENSG00000076108	BAZ2A	-0.11945	0.48857
ENSG00000123636	BAZ2B	0.0969659	0.660911
ENSG00000105327	BBC3	-1.17185	1.24155e-19
ENSG00000214413	BBIP1	0.161593	0.495588
ENSG00000171159	BBLN	-0.0228182	0.935154
ENSG00000119636	BBOF1	0.822507	2.66687e-06
ENSG00000179941	BBS10	0.0279928	0.9349
ENSG00000181004	BBS12	0.197613	0.505483
ENSG00000125124	BBS2	-0.0506108	0.860224
ENSG00000140463	BBS4	-0.0520466	0.856437
ENSG00000163093	BBS5	0.116446	0.737625
ENSG00000138686	BBS7	0.191797	0.337096
ENSG00000122507	BBS9	-0.0220033	0.941846
ENSG00000114439	BBX	0.202643	0.161688
ENSG00000187244	BCAM	0.188154	0.222006
ENSG00000132692	BCAN	-1.90754	0.00770976
ENSG00000075790	BCAP29	-0.719403	0.479614
ENSG00000185825	BCAP31	0.228537	0.104566
ENSG00000050820	BCAR1	-0.554885	1.16241e-06
ENSG00000137936	BCAR3	-0.544688	3.00739e-06
ENSG00000116752	BCAS2	-0.0452565	0.868859
ENSG00000141376	BCAS3	-0.106631	0.639963
ENSG00000124243	BCAS4	-0.509015	0.00511486
ENSG00000060982	BCAT1	0.138278	0.430735
ENSG00000105552	BCAT2	0.0988442	0.669671
ENSG00000107949	BCCIP	-0.0728582	0.75552
ENSG00000186666	BCDIN3D	0.176717	0.55446
ENSG00000114200	BCHE	0.38276	0.582131
ENSG00000248098	BCKDHA	-0.265883	0.826756
ENSG00000083123	BCKDHB	0.149784	0.589926
ENSG00000103507	BCKDK	-0.131348	0.45665
ENSG00000142867	BCL10	-0.202352	0.260339
ENSG00000119866	BCL11A	-0.173861	0.727547
ENSG00000171791	BCL2	-0.611859	0.046026
ENSG00000171552	BCL2L1	-0.292714	0.0217582
ENSG00000137875	BCL2L10	0.538708	0.14635
ENSG00000153094	BCL2L11	0.707547	0.000139799
ENSG00000126453	BCL2L12	-0.328881	0.184738
ENSG00000099968	BCL2L13	-0.0871982	0.652054
ENSG00000188761	BCL2L15	-0.434975	0.703272
ENSG00000129473	BCL2L2	0.242807	0.0944058
ENSG00000258643	BCL2L2-PABPN1	0.315307	0.656462
ENSG00000069399	BCL3	-0.266292	0.0939848
ENSG00000113916	BCL6	0.127643	0.464395
ENSG00000161940	BCL6B	-0.584681	0.572462
ENSG00000110987	BCL7A	-0.368663	0.0794615
ENSG00000106635	BCL7B	0.0141549	0.955634
ENSG00000099385	BCL7C	-0.468339	0.00014109
ENSG00000116128	BCL9	-0.23772	0.170766
ENSG00000186174	BCL9L	-0.0489974	0.826936
ENSG00000029363	BCLAF1	0.00114411	0.997797
ENSG00000173681	BCLAF3	0.0119051	0.975699
ENSG00000197580	BCO2	1.24801	0.000217116
ENSG00000183337	BCOR	-0.116356	0.570581
ENSG00000085185	BCORL1	0.0952719	0.669399
ENSG00000186716	BCR	-0.0362487	0.876508
ENSG00000074582	BCS1L	-0.173929	0.494329
ENSG00000161267	BDH1	0.407761	0.315959
ENSG00000164039	BDH2	0.0313968	0.906117
ENSG00000100739	BDKRB1	0.297929	0.0980755
ENSG00000168398	BDKRB2	0.436931	0.000255948
ENSG00000176697	BDNF	-0.506553	2.50882e-05
ENSG00000145734	BDP1	-0.0208545	0.956584
ENSG00000166546	BEAN1	0.359087	0.288158
ENSG00000126581	BECN1	0.0639262	0.755926
ENSG00000183092	BEGAIN	-1.97054	0.00920213
ENSG00000178409	BEND3	-0.153545	0.615591
ENSG00000151917	BEND6	-0.0797258	0.765806
ENSG00000165626	BEND7	-0.347513	0.278548
ENSG00000167995	BEST1	-0.16116	0.384965
ENSG00000142959	BEST4	0.0589187	0.948435
ENSG00000105829	BET1	0.337429	0.0213539
ENSG00000177951	BET1L	0.186386	0.213792
ENSG00000133169	BEX1	-0.275582	0.275008
ENSG00000133134	BEX2	-1.74609	6.7642e-08
ENSG00000166681	BEX3	0.0694128	0.736317
ENSG00000102409	BEX4	-0.237314	0.188793
ENSG00000103429	BFAR	-0.0986318	0.731746
ENSG00000125864	BFSP1	-0.00281694	0.996905
ENSG00000182492	BGN	-0.813587	5.69518e-13
ENSG00000180535	BHLHA15	-0.489372	0.397407
ENSG00000134107	BHLHE40	-0.654417	1.964e-08
ENSG00000123095	BHLHE41	-1.70046	2.54933e-32
ENSG00000145692	BHMT	0.404152	0.584973
ENSG00000132840	BHMT2	0.168621	0.351946
ENSG00000122870	BICC1	0.0316681	0.894663
ENSG00000151746	BICD1	-0.252784	0.119189
ENSG00000185963	BICD2	-0.012118	0.960654
ENSG00000135127	BICDL1	-0.448101	0.447669
ENSG00000063169	BICRA	0.12003	0.586424
ENSG00000112624	BICRAL	0.0857835	0.721864
ENSG00000015475	BID	-0.184579	0.311703
ENSG00000136717	BIN1	0.0426781	0.84837
ENSG00000147439	BIN3	-0.0617136	0.829019
ENSG00000110330	BIRC2	0.170036	0.285228
ENSG00000023445	BIRC3	-0.395359	0.277159
ENSG00000089685	BIRC5	-1.71849	1.47143e-19
ENSG00000115760	BIRC6	-0.0599666	0.776012
ENSG00000134897	BIVM	-0.00150173	0.99756
ENSG00000166619	BLCAP	0.132173	0.439387
ENSG00000197299	BLM	-1.34571	4.26363e-05
ENSG00000108578	BLMH	-0.104118	0.599016
ENSG00000135441	BLOC1S1	-0.047372	0.894219
ENSG00000196072	BLOC1S2	-0.328606	0.0246122
ENSG00000189114	BLOC1S3	-0.161732	0.501453
ENSG00000186222	BLOC1S4	-0.00493925	0.990652
ENSG00000188428	BLOC1S5	-0.0581152	0.858007
ENSG00000104164	BLOC1S6	0.123793	0.475467
ENSG00000138688	BLTP1	0.0648175	0.752563
ENSG00000007202	BLTP2	-0.0831552	0.681945
ENSG00000065060	BLTP3A	-0.149454	0.367638
ENSG00000111647	BLTP3B	0.0522285	0.833974
ENSG00000106605	BLVRA	-0.185999	0.314876
ENSG00000090013	BLVRB	-0.301071	0.0652352
ENSG00000117475	BLZF1	0.136072	0.530841
ENSG00000133794	BMAL1	0.361582	0.0519779
ENSG00000029153	BMAL2	-0.511254	0.000860676
ENSG00000166780	BMERB1	-0.466402	0.0125924
ENSG00000104081	BMF	-0.838675	2.30556e-05
ENSG00000168283	BMI1	0.160757	0.450108
ENSG00000168487	BMP1	0.556957	2.07615e-06
ENSG00000125845	BMP2	1.35971	6.41438e-20
ENSG00000138756	BMP2K	-0.712242	2.39431e-10
ENSG00000152785	BMP3	-0.605201	0.603041
ENSG00000125378	BMP4	0.0749928	0.896475
ENSG00000153162	BMP6	2.37366	1.2135e-51
ENSG00000183682	BMP8A	1.28734	8.13944e-06
ENSG00000116985	BMP8B	1.53165	0.0906104
ENSG00000164619	BMPER	-0.0552028	0.883595
ENSG00000107779	BMPR1A	-0.0244193	0.926357
ENSG00000138696	BMPR1B	0.89289	2.4852e-07
ENSG00000204217	BMPR2	-0.0548011	0.802284
ENSG00000165733	BMS1	-0.170655	0.284863
ENSG00000164603	BMT2	0.319761	0.0632453
ENSG00000169594	BNC1	-0.456153	0.00895079
ENSG00000173068	BNC2	0.322857	0.00998697
ENSG00000113734	BNIP1	-0.0608475	0.861218
ENSG00000140299	BNIP2	0.119021	0.493343
ENSG00000176171	BNIP3	0.285975	0.0367069
ENSG00000104765	BNIP3L	0.30997	0.0184972
ENSG00000163141	BNIPL	-0.319379	0.738691
ENSG00000144857	BOC	0.430112	0.000572786
ENSG00000145919	BOD1	-0.227565	0.110149
ENSG00000038219	BOD1L1	0.00768116	0.977195
ENSG00000176720	BOK	-0.418787	0.000336611
ENSG00000178096	BOLA1	0.0846223	0.827472
ENSG00000163170	BOLA3	-0.0832384	0.795563
ENSG00000261236	BOP1	-0.477789	0.000160914
ENSG00000136122	BORA	-0.0473063	0.924003
ENSG00000165714	BORCS5	-0.119275	0.644327
ENSG00000196544	BORCS6	-0.110835	0.706961
ENSG00000166275	BORCS7	0.466561	0.00305229
ENSG00000254901	BORCS8	-0.153522	0.628534
ENSG00000172331	BPGM	0.342036	0.00688664
ENSG00000137274	BPHL	-0.345198	0.11678
ENSG00000101425	BPI	-0.381862	0.750758
ENSG00000162813	BPNT1	-0.122629	0.566622
ENSG00000104331	BPNT2	0.435082	0.000260569
ENSG00000171634	BPTF	-0.0212108	0.930987
ENSG00000157764	BRAF	-0.0247311	0.927168
ENSG00000089234	BRAP	0.0495766	0.842175
ENSG00000106009	BRAT1	-0.173233	0.347136
ENSG00000012048	BRCA1	-0.638359	0.00729724
ENSG00000139618	BRCA2	-0.237142	0.524205
ENSG00000185515	BRCC3	0.00396432	0.99321
ENSG00000100425	BRD1	-0.0368296	0.876508
ENSG00000204256	BRD2	-0.0459583	0.843697
ENSG00000169925	BRD3	-0.045566	0.837857
ENSG00000235106	BRD3OS	0.109748	0.565814
ENSG00000141867	BRD4	-0.169669	0.27642
ENSG00000166164	BRD7	-0.135774	0.446889
ENSG00000112983	BRD8	0.0879411	0.671645
ENSG00000028310	BRD9	-0.163509	0.360883
ENSG00000185024	BRF1	-0.0550708	0.824082
ENSG00000104221	BRF2	-0.00338476	0.995659
ENSG00000164713	BRI3	-0.386287	0.00113131
ENSG00000184992	BRI3BP	-0.0381187	0.904379
ENSG00000182685	BRICD5	0.0199236	0.976701
ENSG00000078725	BRINP1	0.841559	0.0463226
ENSG00000136492	BRIP1	-0.898756	1.19683e-05
ENSG00000113460	BRIX1	-0.00826484	0.980117
ENSG00000254999	BRK1	-0.0150743	0.951392
ENSG00000132016	BRME1	-0.331659	0.598899
ENSG00000174744	BRMS1	-0.0886342	0.688663
ENSG00000100916	BRMS1L	0.181296	0.456651
ENSG00000162819	BROX	-0.121318	0.493256
ENSG00000156983	BRPF1	-0.148467	0.471279
ENSG00000096070	BRPF3	0.139502	0.40517
ENSG00000160469	BRSK1	-0.118906	0.683908
ENSG00000174672	BRSK2	0.581037	0.164411
ENSG00000185658	BRWD1	0.027087	0.914318
ENSG00000165288	BRWD3	-0.194738	0.350692
ENSG00000168000	BSCL2	0.226432	0.572462
ENSG00000160058	BSDC1	-0.120589	0.482332
ENSG00000172270	BSG	0.310771	0.0240661
ENSG00000164061	BSN	0.297116	0.586526
ENSG00000109743	BST1	-0.0809275	0.730275
ENSG00000130303	BST2	0.364426	0.065721
ENSG00000095564	BTAF1	0.245894	0.0803884
ENSG00000064726	BTBD1	0.0607325	0.76982
ENSG00000148925	BTBD10	-0.309519	0.0259806
ENSG00000222009	BTBD19	0.0934966	0.702565
ENSG00000133243	BTBD2	-0.0301141	0.898092
ENSG00000132640	BTBD3	0.155641	0.34101
ENSG00000184887	BTBD6	-0.0851334	0.66765
ENSG00000011114	BTBD7	-0.1288	0.718019
ENSG00000189195	BTBD8	-0.155289	0.70941
ENSG00000183826	BTBD9	-0.160709	0.417902
ENSG00000169814	BTD	0.150932	0.366085
ENSG00000145741	BTF3	-0.0696062	0.744187
ENSG00000134717	BTF3L4	-0.0952629	0.620074
ENSG00000133639	BTG1	0.71292	5.25041e-11
ENSG00000159388	BTG2	0.0641172	0.798121
ENSG00000154640	BTG3	-0.119836	0.572118
ENSG00000186265	BTLA	1.70785	0.00133448
ENSG00000112763	BTN2A1	0.132943	0.446941
ENSG00000124508	BTN2A2	-0.291175	0.121036
ENSG00000026950	BTN3A1	0.104804	0.57977
ENSG00000186470	BTN3A2	0.308296	0.0166653
ENSG00000111801	BTN3A3	0.0726714	0.745825
ENSG00000166167	BTRC	0.0390756	0.88122
ENSG00000169679	BUB1	-1.37014	1.83374e-09
ENSG00000156970	BUB1B	-1.8874	1.03579e-14
ENSG00000154473	BUB3	-0.231432	0.0994025
ENSG00000137656	BUD13	-0.0922327	0.7526
ENSG00000071462	BUD23	0.111377	0.569832
ENSG00000106245	BUD31	-0.196031	0.189049
ENSG00000112276	BVES	0.239686	0.139772
ENSG00000112578	BYSL	-0.340884	0.0374913
ENSG00000082153	BZW1	0.0111341	0.963633
ENSG00000136261	BZW2	-0.318597	0.0179303
ENSG00000214688	C10orf105	0.75844	0.028484
ENSG00000237489	C10orf143	0.162752	0.720894
ENSG00000179133	C10orf67	-0.0302763	0.980974
ENSG00000119965	C10orf88	-0.279116	0.208415
ENSG00000154493	C10orf90	0.987721	0.317025
ENSG00000171067	C11orf24	0.167492	0.277404
ENSG00000149300	C11orf52	-0.0126216	0.989051
ENSG00000182919	C11orf54	0.344068	0.104759
ENSG00000110696	C11orf58	0.0838034	0.665794
ENSG00000166323	C11orf65	-0.518084	0.428354
ENSG00000175573	C11orf68	-0.279	0.0370758
ENSG00000180425	C11orf71	-0.143639	0.764379
ENSG00000173715	C11orf80	-0.0867476	0.819001
ENSG00000173237	C11orf86	2.86069	0.00427857
ENSG00000185742	C11orf87	2.61148	1.03959e-23
ENSG00000187479	C11orf96	0.622698	2.28831e-08
ENSG00000133641	C12orf29	0.0745577	0.792764
ENSG00000047621	C12orf4	-0.113398	0.624684
ENSG00000157895	C12orf43	-0.195469	0.338217
ENSG00000111678	C12orf57	0.0660304	0.746046
ENSG00000182993	C12orf60	0.0542177	0.941194
ENSG00000235162	C12orf75	-0.619032	7.50233e-08
ENSG00000174456	C12orf76	0.255395	0.454542
ENSG00000283199	C13orf46	-0.301102	0.532336
ENSG00000179933	C14orf119	0.0468039	0.832706
ENSG00000227051	C14orf132	-0.153915	0.339065
ENSG00000179476	C14orf28	-0.0417633	0.903554
ENSG00000100802	C14orf93	-0.117193	0.737867
ENSG00000167173	C15orf39	0.531408	1.05332e-05
ENSG00000169609	C15orf40	0.0578173	0.853881
ENSG00000166920	C15orf48	0.0757214	0.948617
ENSG00000189227	C15orf61	0.203915	0.453979
ENSG00000188277	C15orf62	1.42159	0.0162068
ENSG00000166455	C16orf46	-0.342045	0.431151
ENSG00000154102	C16orf74	-0.675821	0.00689427
ENSG00000159761	C16orf86	0.501738	0.113519
ENSG00000155330	C16orf87	-0.000966819	0.998492
ENSG00000260456	C16orf95	0.124405	0.864949
ENSG00000256806	C17orf100	0.229553	0.554022
ENSG00000205710	C17orf107	-0.49695	0.0147206
ENSG00000267221	C17orf113	-0.839569	0.17838
ENSG00000262165	C17orf114	0.0888333	0.913817
ENSG00000258315	C17orf49	-0.79299	0.144129
ENSG00000186665	C17orf58	0.600069	0.000287881
ENSG00000214226	C17orf67	-0.344185	0.25803
ENSG00000108666	C17orf75	-0.156089	0.524542
ENSG00000141219	C17orf80	-0.112205	0.622528
ENSG00000187624	C17orf97	-0.289751	0.290741
ENSG00000141428	C18orf21	-0.23121	0.351848
ENSG00000152242	C18orf25	-0.146302	0.447271
ENSG00000177576	C18orf32	0.182799	0.589969
ENSG00000166845	C18orf54	-0.431499	0.100304
ENSG00000131943	C19orf12	8.0277e-05	0.999654
ENSG00000177025	C19orf18	0.0179897	0.983056
ENSG00000119559	C19orf25	0.0702881	0.780004
ENSG00000214212	C19orf38	-0.218678	0.754548
ENSG00000105072	C19orf44	0.000742228	0.998953
ENSG00000160392	C19orf47	-0.152066	0.567862
ENSG00000104979	C19orf53	-0.0960106	0.615548
ENSG00000221916	C19orf73	-0.50852	0.354885
ENSG00000235034	C19orf81	0.136405	0.851185
ENSG00000197223	C1D	0.101074	0.73402
ENSG00000106392	C1GALT1	0.214868	0.314129
ENSG00000171155	C1GALT1C1	1.25577	1.17429e-27
ENSG00000223658	C1GALT1C1L	0.280048	0.576192
ENSG00000116922	C1orf109	-0.107108	0.674752
ENSG00000000460	C1orf112	-0.445942	0.0849446
ENSG00000162817	C1orf115	-0.0292498	0.934909
ENSG00000197982	C1orf122	-0.0454283	0.842221
ENSG00000143633	C1orf131	-0.0861199	0.799572
ENSG00000131591	C1orf159	-0.193741	0.487606
ENSG00000143110	C1orf162	0.260142	0.802123
ENSG00000215910	C1orf167	1.30914	0.00694999
ENSG00000198912	C1orf174	0.136746	0.567043
ENSG00000119280	C1orf198	-1.08112	5.1003e-22
ENSG00000116667	C1orf21	2.12905	2.03478e-82
ENSG00000142686	C1orf216	0.104758	0.61412
ENSG00000239887	C1orf226	1.03073	0.0018806
ENSG00000143793	C1orf35	-0.2392	0.313832
ENSG00000143612	C1orf43	0.00654184	0.981471
ENSG00000164008	C1orf50	-0.242848	0.402686
ENSG00000162642	C1orf52	0.0845069	0.73284
ENSG00000203724	C1orf53	0.37009	0.230341
ENSG00000118292	C1orf54	-0.398116	0.0945605
ENSG00000143443	C1orf56	0.271361	0.362835
ENSG00000162757	C1orf74	-0.106283	0.917231
ENSG00000108561	C1QBP	-0.204881	0.160009
ENSG00000131094	C1QL1	-0.297028	0.5048
ENSG00000186897	C1QL4	-0.737942	0.519878
ENSG00000173918	C1QTNF1	1.00421	1.06962e-20
ENSG00000184163	C1QTNF12	-0.878589	0.0118329
ENSG00000145861	C1QTNF2	-1.05617	6.37392e-05
ENSG00000082196	C1QTNF3	-0.201978	0.761254
ENSG00000172247	C1QTNF4	-0.305104	0.523461
ENSG00000223953	C1QTNF5	0.289268	0.792062
ENSG00000133466	C1QTNF6	0.30989	0.0486649
ENSG00000163145	C1QTNF7	1.5052	5.90579e-25
ENSG00000240654	C1QTNF9	-0.60912	0.389094
ENSG00000205863	C1QTNF9B	-0.707363	0.16512
ENSG00000159403	C1R	1.17886	2.9227e-25
ENSG00000139178	C1RL	0.874451	1.21546e-14
ENSG00000182326	C1S	0.688343	5.86209e-09
ENSG00000166278	C2	-0.166962	0.883789
ENSG00000198547	C20orf203	-0.959547	0.339065
ENSG00000196476	C20orf96	-0.198679	0.496276
ENSG00000160298	C21orf58	-0.115777	0.788089
ENSG00000154642	C21orf91	-0.350656	0.0535688
ENSG00000169314	C22orf15	0.221681	0.83764
ENSG00000128346	C22orf23	0.216988	0.715045
ENSG00000242259	C22orf39	0.216877	0.275584
ENSG00000157617	C2CD2	-0.22794	0.114259
ENSG00000172375	C2CD2L	0.0914936	0.745094
ENSG00000168014	C2CD3	-0.0248266	0.920577
ENSG00000183186	C2CD4C	0.0486929	0.976534
ENSG00000111731	C2CD5	0.040426	0.881661
ENSG00000155754	C2CD6	0.0368682	0.961057
ENSG00000273045	C2orf15	0.206497	0.850227
ENSG00000115998	C2orf42	-0.123612	0.667173
ENSG00000135974	C2orf49	0.316541	0.0409705
ENSG00000187944	C2orf66	0.377897	0.673889
ENSG00000168887	C2orf68	-0.0828912	0.733016
ENSG00000178074	C2orf69	0.133868	0.605794
ENSG00000204128	C2orf72	0.996503	0.0785139
ENSG00000237651	C2orf74	-0.178021	0.879903
ENSG00000186132	C2orf76	0.307633	0.265777
ENSG00000284308	C2orf81	-0.0973857	0.887322
ENSG00000187699	C2orf88	1.51598	1.81285e-10
ENSG00000228486	C2orf92	0.0235588	0.975699
ENSG00000125730	C3	2.30649	2.29748e-22
ENSG00000171860	C3AR1	-0.810867	0.264257
ENSG00000114405	C3orf14	-0.0333407	0.938971
ENSG00000088543	C3orf18	0.189886	0.384233
ENSG00000131379	C3orf20	0.602023	0.54837
ENSG00000174928	C3orf33	0.00163622	0.998675
ENSG00000179021	C3orf38	-0.0473707	0.86137
ENSG00000114529	C3orf52	-0.942457	7.2588e-05
ENSG00000188315	C3orf62	0.116878	0.771281
ENSG00000187068	C3orf70	0.233484	0.421216
ENSG00000180044	C3orf80	-3.2136	2.2438e-21
ENSG00000244731	C4A	0.120451	0.85681
ENSG00000224389	C4B	0.172723	0.762939
ENSG00000164096	C4orf3	0.215359	0.129218
ENSG00000151470	C4orf33	-0.0712554	0.86625
ENSG00000163633	C4orf36	0.22095	0.874476
ENSG00000205208	C4orf46	-0.0608198	0.852258
ENSG00000205129	C4orf47	0.320675	0.740987
ENSG00000243449	C4orf48	0.257576	0.199817
ENSG00000106804	C5	0.115285	0.794513
ENSG00000197405	C5AR1	0.524611	0.0917171
ENSG00000134830	C5AR2	3.23989	9.24205e-08
ENSG00000113583	C5orf15	0.146602	0.367596
ENSG00000082213	C5orf22	0.0803237	0.730724
ENSG00000181904	C5orf24	0.173884	0.256638
ENSG00000172244	C5orf34	-0.0762054	0.889266
ENSG00000178776	C5orf46	-0.202811	0.634914
ENSG00000164241	C5orf63	-0.126416	0.804267
ENSG00000039537	C6	0.601731	0.608687
ENSG00000185127	C6orf120	0.156115	0.338572
ENSG00000188112	C6orf132	-0.736572	5.44017e-08
ENSG00000204564	C6orf136	0.0730441	0.888525
ENSG00000197261	C6orf141	-1.51658	4.51029e-05
ENSG00000203872	C6orf163	-0.564894	0.365551
ENSG00000221821	C6orf226	-0.0239663	0.960868
ENSG00000137434	C6orf52	0.492758	0.597755
ENSG00000112308	C6orf62	0.0569162	0.799109
ENSG00000198663	C6orf89	0.580974	5.14396e-07
ENSG00000112936	C7	0.625189	0.480305
ENSG00000136197	C7orf25	0.0514505	0.861508
ENSG00000153790	C7orf31	0.271878	0.370413
ENSG00000146540	C7orf50	-0.295367	0.0388142
ENSG00000164746	C7orf57	2.72403	0.00159086
ENSG00000176919	C8G	-0.189347	0.830822
ENSG00000182307	C8orf33	-0.126587	0.488662
ENSG00000165084	C8orf34	-0.0712393	0.867728
ENSG00000164743	C8orf48	0.309511	0.369348
ENSG00000241852	C8orf58	-0.338719	0.0421207
ENSG00000189376	C8orf76	0.179631	0.629996
ENSG00000213563	C8orf82	0.120957	0.576813
ENSG00000253250	C8orf88	0.245476	0.376949
ENSG00000113600	C9	1.062	0.0592322
ENSG00000188959	C9orf152	0.90771	0.192384
ENSG00000187753	C9orf153	2.08456	0.0209375
ENSG00000164972	C9orf24	0.48271	0.688949
ENSG00000135045	C9orf40	-0.233547	0.362036
ENSG00000157653	C9orf43	0.476208	0.428507
ENSG00000179058	C9orf50	-0.218981	0.765222
ENSG00000165118	C9orf64	-0.145684	0.513607
ENSG00000147894	C9orf72	0.349886	0.146456
ENSG00000136819	C9orf78	-0.105027	0.571397
ENSG00000155621	C9orf85	-0.00619041	0.989051
ENSG00000063180	CA11	-0.519078	0.0080235
ENSG00000074410	CA12	-0.667598	7.33445e-08
ENSG00000185015	CA13	-0.151972	0.783169
ENSG00000169239	CA5B	-0.0659427	0.807645
ENSG00000178538	CA8	4.43396	1.3634e-13
ENSG00000107159	CA9	1.23312	0.184541
ENSG00000120159	CAAP1	-0.041003	0.891089
ENSG00000135932	CAB39	-0.0280918	0.906978
ENSG00000102547	CAB39L	0.372744	0.0158172
ENSG00000183346	CABCOCO1	0.408805	0.210915
ENSG00000099991	CABIN1	-0.237661	0.0833628
ENSG00000134508	CABLES1	-0.328487	0.244576
ENSG00000149679	CABLES2	-0.0713638	0.816875
ENSG00000100314	CABP7	-0.83368	0.199297
ENSG00000154040	CABYR	-0.203064	0.478228
ENSG00000160325	CACFD1	-0.0716134	0.784539
ENSG00000158966	CACHD1	0.421798	0.0106891
ENSG00000141837	CACNA1A	-0.5596	0.0339044
ENSG00000148408	CACNA1B	0.908353	0.154898
ENSG00000151067	CACNA1C	0.118399	0.510429
ENSG00000157388	CACNA1D	-1.18932	0.00826406
ENSG00000006283	CACNA1G	0.995674	0.00014624
ENSG00000196557	CACNA1H	-0.111141	0.554409
ENSG00000100346	CACNA1I	0.0143623	0.996186
ENSG00000153956	CACNA2D1	0.38123	0.00219032
ENSG00000007402	CACNA2D2	0.140205	0.88519
ENSG00000157445	CACNA2D3	0.852455	4.94844e-06
ENSG00000151062	CACNA2D4	-0.0358377	0.954821
ENSG00000067191	CACNB1	-0.433946	0.029808
ENSG00000165995	CACNB2	2.95479	6.00177e-20
ENSG00000167535	CACNB3	0.140722	0.402263
ENSG00000182389	CACNB4	0.332169	0.705373
ENSG00000075461	CACNG4	-1.06422	0.0164346
ENSG00000130433	CACNG6	-1.24932	0.00163011
ENSG00000105605	CACNG7	-0.659768	0.0379145
ENSG00000142408	CACNG8	-0.664488	0.077698
ENSG00000105298	CACTIN	-0.133153	0.502424
ENSG00000151893	CACUL1	0.0959441	0.611966
ENSG00000116161	CACYBP	-0.424604	0.00156137
ENSG00000084774	CAD	-0.238301	0.0868056
ENSG00000182985	CADM1	0.423499	0.0725987
ENSG00000105767	CADM4	-0.509679	0.000224576
ENSG00000163618	CADPS	-2.30555	0.0003074
ENSG00000081803	CADPS2	0.421407	0.00100634
ENSG00000172137	CALB2	-2.36146	6.06959e-49
ENSG00000012822	CALCOCO1	-0.0404351	0.85681
ENSG00000136436	CALCOCO2	0.217446	0.125571
ENSG00000064989	CALCRL	0.0181184	0.97356
ENSG00000122786	CALD1	0.089898	0.683995
ENSG00000138172	CALHM2	0.0300026	0.91091
ENSG00000178033	CALHM5	-0.14461	0.434308
ENSG00000198668	CALM1	-0.0962801	0.621746
ENSG00000143933	CALM2	-0.0785496	0.714294
ENSG00000160014	CALM3	-0.240285	0.0919902
ENSG00000129007	CALML4	0.219666	0.696988
ENSG00000169885	CALML6	-0.345235	0.682118
ENSG00000179218	CALR	0.0822149	0.706961
ENSG00000128595	CALU	0.592643	1.82049e-06
ENSG00000130643	CALY	-0.317059	0.668979
ENSG00000134072	CAMK1	-0.00525341	0.989923
ENSG00000183049	CAMK1D	-0.398944	0.00849758
ENSG00000008118	CAMK1G	0.595903	0.00475519
ENSG00000070808	CAMK2A	-0.68334	0.0258927
ENSG00000058404	CAMK2B	-0.365939	0.732291
ENSG00000145349	CAMK2D	-0.336929	0.00642097
ENSG00000148660	CAMK2G	0.168988	0.286549
ENSG00000162545	CAMK2N1	0.0809347	0.684828
ENSG00000163888	CAMK2N2	-0.922993	8.39756e-05
ENSG00000152495	CAMK4	-1.23036	7.32414e-07
ENSG00000004660	CAMKK1	-0.146792	0.635992
ENSG00000110931	CAMKK2	0.0472089	0.832495
ENSG00000143919	CAMKMT	-0.485134	0.0556792
ENSG00000164615	CAMLG	0.0311454	0.898076
ENSG00000130559	CAMSAP1	-0.297149	0.0234045
ENSG00000118200	CAMSAP2	-0.12266	0.477445
ENSG00000171735	CAMTA1	0.216182	0.211446
ENSG00000108509	CAMTA2	-0.122272	0.486407
ENSG00000111530	CAND1	-0.0046545	0.988298
ENSG00000144712	CAND2	-0.606397	0.000642062
ENSG00000171302	CANT1	-0.179333	0.238408
ENSG00000127022	CANX	0.121009	0.536106
ENSG00000131236	CAP1	-0.139166	0.445847
ENSG00000112186	CAP2	0.240233	0.0798538
ENSG00000042493	CAPG	-0.456465	0.000866073
ENSG00000014216	CAPN1	-0.18794	0.21981
ENSG00000142330	CAPN10	-0.032821	0.923185
ENSG00000182472	CAPN12	-0.0937741	0.897543
ENSG00000103326	CAPN15	-0.164215	0.327753
ENSG00000162909	CAPN2	-0.335515	0.0128526
ENSG00000092529	CAPN3	0.227228	0.732361
ENSG00000149260	CAPN5	-0.238836	0.0920668
ENSG00000077274	CAPN6	2.98192	1.25476e-71
ENSG00000131375	CAPN7	0.0632355	0.778072
ENSG00000135773	CAPN9	-0.68868	0.525465
ENSG00000126247	CAPNS1	-0.179032	0.269529
ENSG00000256812	CAPNS2	0.0431939	0.971337
ENSG00000135387	CAPRIN1	-0.0380016	0.873886
ENSG00000110888	CAPRIN2	-0.258004	0.184998
ENSG00000105519	CAPS	0.140794	0.738347
ENSG00000180881	CAPS2	0.121279	0.829741
ENSG00000116489	CAPZA1	0.0660545	0.755067
ENSG00000198898	CAPZA2	0.31515	0.0123735
ENSG00000077549	CAPZB	0.007035	0.980418
ENSG00000100065	CARD10	-1.73136	2.9125e-18
ENSG00000198286	CARD11	-1.36056	7.64101e-08
ENSG00000141527	CARD14	0.20794	0.873076
ENSG00000204397	CARD16	0.226328	0.218502
ENSG00000165233	CARD19	0.131698	0.548663
ENSG00000132357	CARD6	0.141966	0.540534
ENSG00000105483	CARD8	0.123128	0.625951
ENSG00000138380	CARF	0.199394	0.521005
ENSG00000153048	CARHSP1	0.364879	0.00261975
ENSG00000142453	CARM1	-0.0687709	0.737149
ENSG00000079691	CARMIL1	-0.0184645	0.954561
ENSG00000159753	CARMIL2	1.23388	0.00618685
ENSG00000186648	CARMIL3	0.488164	0.667728
ENSG00000156017	CARNMT1	-0.0626335	0.825928
ENSG00000172508	CARNS1	0.376219	0.696988
ENSG00000110619	CARS1	-0.244544	0.0735282
ENSG00000134905	CARS2	0.373236	0.00246537
ENSG00000108349	CASC3	-0.175186	0.251086
ENSG00000127995	CASD1	0.0550857	0.861114
ENSG00000147044	CASK	-0.0950333	0.608142
ENSG00000167971	CASKIN1	0.0423657	0.939779
ENSG00000177303	CASKIN2	-0.234202	0.187326
ENSG00000137752	CASP1	-0.142604	0.53496
ENSG00000003400	CASP10	-0.365981	0.149521
ENSG00000204403	CASP12	0.799422	0.162661
ENSG00000106144	CASP2	-0.34582	0.0128663
ENSG00000164305	CASP3	-0.032424	0.898555
ENSG00000196954	CASP4	-0.0249113	0.920577
ENSG00000138794	CASP6	-0.109522	0.688663
ENSG00000165806	CASP7	0.0717802	0.743505
ENSG00000064012	CASP8	-0.363598	0.0655923
ENSG00000118412	CASP8AP2	-0.0690484	0.826756
ENSG00000132906	CASP9	0.280898	0.17617
ENSG00000143318	CASQ1	-2.14161	0.00569179
ENSG00000087589	CASS4	-1.54794	3.19917e-07
ENSG00000153113	CAST	0.35258	0.00599432
ENSG00000239282	CASTOR1	0.258312	0.576295
ENSG00000274070	CASTOR2	0.57031	4.67451e-07
ENSG00000130940	CASZ1	0.369694	0.384965
ENSG00000121691	CAT	0.766255	4.93293e-12
ENSG00000175294	CATSPER1	-1.46957	0.081827
ENSG00000166762	CATSPER2	-0.283402	0.749992
ENSG00000152705	CATSPER3	0.4189	0.471061
ENSG00000179397	CATSPERE	0.428481	0.269154
ENSG00000099338	CATSPERG	0.780577	0.224226
ENSG00000105974	CAV1	-0.714619	9.54634e-10
ENSG00000105971	CAV2	-0.335796	0.00658185
ENSG00000177469	CAVIN1	-0.25917	0.08635
ENSG00000168497	CAVIN2	0.186709	0.51875
ENSG00000170955	CAVIN3	0.131625	0.43488
ENSG00000170681	CAVIN4	-0.150125	0.764342
ENSG00000099625	CBARP	-0.373442	0.0400149
ENSG00000078699	CBFA2T2	-0.124727	0.604385
ENSG00000067955	CBFB	-0.338782	0.00778663
ENSG00000110395	CBL	-0.211782	0.136987
ENSG00000114423	CBLB	0.647124	6.35413e-09
ENSG00000105879	CBLL1	-0.0767806	0.752864
ENSG00000141668	CBLN2	-3.45506	0.000219832
ENSG00000139899	CBLN3	-0.148316	0.635992
ENSG00000159228	CBR1	-0.0681312	0.74546
ENSG00000159231	CBR3	-0.643184	0.000572626
ENSG00000145439	CBR4	0.28506	0.14384
ENSG00000160200	CBS	0.213949	0.474957
ENSG00000108468	CBX1	-0.437241	0.000189462
ENSG00000173894	CBX2	-0.297362	0.288663
ENSG00000122565	CBX3	0.116588	0.503742
ENSG00000141582	CBX4	0.0122282	0.964729
ENSG00000094916	CBX5	-0.336991	0.0076572
ENSG00000183741	CBX6	0.155839	0.350492
ENSG00000100307	CBX7	0.190553	0.361294
ENSG00000141570	CBX8	0.0607891	0.863877
ENSG00000100211	CBY1	0.158072	0.43801
ENSG00000132024	CC2D1A	-0.128066	0.499248
ENSG00000154222	CC2D1B	-0.17297	0.307102
ENSG00000048342	CC2D2A	-0.0146457	0.957096
ENSG00000060339	CCAR1	0.0148347	0.952577
ENSG00000158941	CCAR2	-0.0802252	0.681107
ENSG00000183287	CCBE1	1.50999	1.81783e-20
ENSG00000135736	CCDC102A	0.170752	0.391702
ENSG00000150636	CCDC102B	0.125842	0.812202
ENSG00000167131	CCDC103	-0.302311	0.40322
ENSG00000173581	CCDC106	-0.0164288	0.957687
ENSG00000159884	CCDC107	0.109565	0.58536
ENSG00000168491	CCDC110	0.0795862	0.953692
ENSG00000164221	CCDC112	0.104095	0.749148
ENSG00000103021	CCDC113	-0.378002	0.274801
ENSG00000136710	CCDC115	-0.0471563	0.869263
ENSG00000161180	CCDC116	0.0091456	0.99586
ENSG00000159873	CCDC117	0.0407134	0.861487
ENSG00000160799	CCDC12	-0.135592	0.547287
ENSG00000147144	CCDC120	-0.081551	0.82998
ENSG00000176714	CCDC121	0.288114	0.50434
ENSG00000151773	CCDC122	-0.00272143	0.997373
ENSG00000007080	CCDC124	-0.149119	0.37168
ENSG00000183323	CCDC125	-0.262661	0.493243
ENSG00000169193	CCDC126	0.363315	0.122152
ENSG00000164366	CCDC127	0.132667	0.477642
ENSG00000100147	CCDC134	-0.0563195	0.861218
ENSG00000128596	CCDC136	-0.447547	0.0379192
ENSG00000185298	CCDC137	-0.0821882	0.730571
ENSG00000163006	CCDC138	0.0423602	0.937871
ENSG00000175455	CCDC14	-0.474189	6.19022e-05
ENSG00000135637	CCDC142	0.078857	0.826151
ENSG00000170160	CCDC144A	-0.110991	0.847254
ENSG00000135205	CCDC146	-0.211219	0.650553
ENSG00000153237	CCDC148	-0.201136	0.799875
ENSG00000181982	CCDC149	-0.125239	0.572016
ENSG00000149548	CCDC15	-0.821306	0.0127732
ENSG00000144395	CCDC150	-0.568215	0.180985
ENSG00000198865	CCDC152	0.29745	0.508811
ENSG00000248712	CCDC153	0.63098	0.0895076
ENSG00000197599	CCDC154	-1.11044	0.0604314
ENSG00000187860	CCDC157	0.288696	0.37753
ENSG00000183401	CCDC159	0.0787553	0.846326
ENSG00000203952	CCDC160	1.14032	0.0470567
ENSG00000280670	CCDC163	-0.0327041	0.955646
ENSG00000198937	CCDC167	-0.31733	0.17785
ENSG00000175820	CCDC168	0.105112	0.908688
ENSG00000242715	CCDC169	-0.214056	0.678677
ENSG00000159588	CCDC17	-0.030557	0.977791
ENSG00000120262	CCDC170	1.85318	9.75139e-27
ENSG00000164989	CCDC171	-0.560966	0.055138
ENSG00000154781	CCDC174	-0.073765	0.780004
ENSG00000122483	CCDC18	-0.29381	0.405957
ENSG00000117477	CCDC181	-0.367264	0.72879
ENSG00000213213	CCDC183	0.592447	0.294412
ENSG00000177875	CCDC184	1.50581	4.01619e-09
ENSG00000165813	CCDC186	0.00889797	0.979462
ENSG00000234409	CCDC188	0.563194	0.172664
ENSG00000185860	CCDC190	-0.261794	0.780238
ENSG00000163617	CCDC191	0.00193424	0.998484
ENSG00000230561	CCDC192	2.67487	2.13557e-05
ENSG00000101997	CCDC22	-0.10855	0.702391
ENSG00000159214	CCDC24	-0.181133	0.700802
ENSG00000147419	CCDC25	-0.0445142	0.856569
ENSG00000024862	CCDC28A	0.0910347	0.756612
ENSG00000160050	CCDC28B	-0.819544	2.82782e-06
ENSG00000151468	CCDC3	0.262652	0.72879
ENSG00000186409	CCDC30	0.417643	0.321512
ENSG00000128891	CCDC32	-0.0186876	0.95649
ENSG00000140481	CCDC33	-1.46559	0.000457168
ENSG00000109881	CCDC34	-0.283172	0.350057
ENSG00000141519	CCDC40	-0.0393273	0.927456
ENSG00000180329	CCDC43	-0.0747886	0.75552
ENSG00000108588	CCDC47	0.102109	0.575995
ENSG00000152492	CCDC50	-0.275653	0.0400283
ENSG00000164051	CCDC51	0.0712614	0.823515
ENSG00000176155	CCDC57	-0.139193	0.620162
ENSG00000133773	CCDC59	-0.0824421	0.771639
ENSG00000108091	CCDC6	-0.177824	0.245971
ENSG00000104983	CCDC61	-0.18194	0.597945
ENSG00000130783	CCDC62	-0.506777	0.452042
ENSG00000139537	CCDC65	-0.163364	0.818571
ENSG00000180376	CCDC66	0.247874	0.329445
ENSG00000166510	CCDC68	1.81409	3.80501e-16
ENSG00000198624	CCDC69	1.41845	1.54665e-16
ENSG00000216937	CCDC7	0.0292516	0.961994
ENSG00000177352	CCDC71	-0.0478877	0.861321
ENSG00000253276	CCDC71L	0.431432	0.000213257
ENSG00000163040	CCDC74A	-0.643175	0.000279323
ENSG00000152076	CCDC74B	0.129576	0.763108
ENSG00000120647	CCDC77	0.0186672	0.966754
ENSG00000162004	CCDC78	-0.249987	0.692117
ENSG00000169515	CCDC8	-0.0985301	0.636415
ENSG00000091986	CCDC80	0.143259	0.424723
ENSG00000149201	CCDC81	-0.917482	5.06529e-10
ENSG00000149231	CCDC82	0.076934	0.774034
ENSG00000055813	CCDC85A	0.918761	2.12851e-05
ENSG00000175602	CCDC85B	-0.5292	4.30965e-06
ENSG00000205476	CCDC85C	-0.347896	0.0257151
ENSG00000110104	CCDC86	-0.339973	0.0269048
ENSG00000182791	CCDC87	0.542246	0.227037
ENSG00000115355	CCDC88A	-0.483967	4.53715e-05
ENSG00000168071	CCDC88B	0.257149	0.524034
ENSG00000015133	CCDC88C	2.3572	0.00415764
ENSG00000179071	CCDC89	0.0619557	0.90835
ENSG00000105321	CCDC9	-0.189736	0.31802
ENSG00000137500	CCDC90B	-0.212536	0.175155
ENSG00000123106	CCDC91	-0.0225006	0.939302
ENSG00000119242	CCDC92	-0.143541	0.583666
ENSG00000125633	CCDC93	-0.173645	0.27317
ENSG00000173013	CCDC96	0.131128	0.755926
ENSG00000142039	CCDC97	-0.122778	0.590781
ENSG00000188549	CCDC9B	-0.00242237	0.996109
ENSG00000204536	CCHCR1	-0.392443	0.141568
ENSG00000185972	CCIN	-1.08553	2.49834e-06
ENSG00000108691	CCL2	0.61771	0.000201639
ENSG00000006606	CCL26	0.847844	0.00396449
ENSG00000151882	CCL28	-0.0443228	0.955304
ENSG00000108688	CCL7	0.0644567	0.955574
ENSG00000108700	CCL8	4.18204	6.44475e-08
ENSG00000136280	CCM2	-0.197113	0.190932
ENSG00000142871	CCN1	-0.499889	6.11935e-05
ENSG00000118523	CCN2	-0.251929	0.111846
ENSG00000136999	CCN3	-0.281444	0.478317
ENSG00000104415	CCN4	1.56201	4.50013e-45
ENSG00000064205	CCN5	1.79789	1.61678e-09
ENSG00000133101	CCNA1	1.34101	0.00183162
ENSG00000145386	CCNA2	-1.01446	1.0286e-07
ENSG00000134057	CCNB1	-1.02767	1.34414e-10
ENSG00000100814	CCNB1IP1	-0.267931	0.0617365
ENSG00000157456	CCNB2	-1.48152	3.81668e-11
ENSG00000147082	CCNB3	0.292956	0.74439
ENSG00000112237	CCNC	0.0964243	0.642522
ENSG00000110092	CCND1	-0.94076	2.6447e-16
ENSG00000118971	CCND2	-0.185261	0.254102
ENSG00000112576	CCND3	0.109333	0.6038
ENSG00000166946	CCNDBP1	0.157007	0.338327
ENSG00000105173	CCNE1	0.391427	0.149284
ENSG00000175305	CCNE2	-1.20063	8.41267e-05
ENSG00000162063	CCNF	-0.621831	0.00144747
ENSG00000113328	CCNG1	-0.0807269	0.683908
ENSG00000138764	CCNG2	0.113545	0.531197
ENSG00000134480	CCNH	0.215056	0.268504
ENSG00000118816	CCNI	0.062118	0.781053
ENSG00000107443	CCNJ	-0.186282	0.486641
ENSG00000135083	CCNJL	-1.07762	3.18057e-08
ENSG00000090061	CCNK	-0.0752704	0.70941
ENSG00000163660	CCNL1	-0.138925	0.502297
ENSG00000221978	CCNL2	-0.0562106	0.796619
ENSG00000152669	CCNO	-0.274038	0.771423
ENSG00000105219	CCNP	0.462506	0.31821
ENSG00000262919	CCNQ	0.116067	0.629574
ENSG00000129315	CCNT1	0.158669	0.356465
ENSG00000082258	CCNT2	0.0196265	0.945611
ENSG00000108100	CCNY	0.0312725	0.892674
ENSG00000163249	CCNYL1	0.00747403	0.981882
ENSG00000103540	CCP110	0.11471	0.68846
ENSG00000260916	CCPG1	0.347184	0.0187305
ENSG00000163823	CCR1	0.298959	0.799875
ENSG00000184451	CCR10	-0.606256	0.0131194
ENSG00000126353	CCR7	2.03198	0.000186261
ENSG00000121797	CCRL2	-1.2525	0.00660551
ENSG00000173992	CCS	0.098997	0.707736
ENSG00000154429	CCSAP	-0.113493	0.665678
ENSG00000107771	CCSER2	-0.322434	0.00986565
ENSG00000166226	CCT2	-0.322225	0.0109435
ENSG00000163468	CCT3	-0.153288	0.358629
ENSG00000115484	CCT4	-0.206219	0.161297
ENSG00000150753	CCT5	-0.284979	0.0328251
ENSG00000146731	CCT6A	-0.17396	0.268093
ENSG00000132141	CCT6B	0.348638	0.305472
ENSG00000135624	CCT7	-0.0683503	0.744285
ENSG00000156261	CCT8	-0.175464	0.258249
ENSG00000122674	CCZ1	0.0957622	0.75352
ENSG00000146574	CCZ1B	-0.00375596	0.99586
ENSG00000134256	CD101	-0.577626	0.244207
ENSG00000156535	CD109	-0.14203	0.393646
ENSG00000170458	CD14	1.63628	1.15095e-07
ENSG00000177697	CD151	0.25151	0.0833628
ENSG00000177675	CD163L1	-0.622163	0.00202231
ENSG00000135535	CD164	0.200856	0.19017
ENSG00000204936	CD177	-0.884122	0.107598
ENSG00000158473	CD1D	2.45815	0.000759698
ENSG00000091972	CD200	-0.0700096	0.740632
ENSG00000150637	CD226	2.24363	8.37913e-23
ENSG00000272398	CD24	-0.134863	0.763984
ENSG00000174807	CD248	0.0303186	0.906117
ENSG00000139193	CD27	-0.136319	0.865575
ENSG00000120217	CD274	-0.424801	0.0113382
ENSG00000103855	CD276	0.0390259	0.864567
ENSG00000198087	CD2AP	-0.10395	0.607543
ENSG00000169217	CD2BP2	-0.267443	0.0430608
ENSG00000241399	CD302	1.37562	2.68847e-30
ENSG00000167775	CD320	0.303343	0.084751
ENSG00000174059	CD34	-0.184066	0.751981
ENSG00000135218	CD36	-0.954978	0.0809121
ENSG00000104894	CD37	-1.06349	0.284429
ENSG00000004468	CD38	1.48865	0.0192216
ENSG00000010610	CD4	0.169401	0.633563
ENSG00000101017	CD40	0.310823	0.567043
ENSG00000026508	CD44	-0.324685	0.0201446
ENSG00000117335	CD46	0.488416	2.65667e-05
ENSG00000196776	CD47	0.323208	0.0107876
ENSG00000196352	CD55	0.625856	9.24205e-08
ENSG00000116815	CD58	0.211647	0.521903
ENSG00000085063	CD59	0.473131	0.000132353
ENSG00000135404	CD63	0.080347	0.711701
[truncated: 12,200 more rows]

## Sheet: S2
Gene stable ID	HGNC symbol	Log2FC(EPC vs VEH)	FDR
ENSG00000121410	A1BG	0.134154	0.870092
ENSG00000175899	A2M	-0.259537	0.0986888
ENSG00000128274	A4GALT	1.06355	3.63639e-15
ENSG00000094914	AAAS	0.0100076	0.979321
ENSG00000081760	AACS	-0.175402	0.286167
ENSG00000114771	AADAC	3.82902	0.000463931
ENSG00000204518	AADACL4	2.57677	2.03033e-09
ENSG00000109576	AADAT	-0.070367	0.84536
ENSG00000103591	AAGAB	-0.0257572	0.923634
ENSG00000115977	AAK1	-0.0421442	0.861018
ENSG00000087884	AAMDC	0.0588922	0.847607
ENSG00000127837	AAMP	-0.123507	0.49273
ENSG00000129673	AANAT	0.0308925	0.991282
ENSG00000131043	AAR2	0.0466827	0.84833
ENSG00000205002	AARD	1.22304	0.0577297
ENSG00000090861	AARS1	-0.283538	0.0392387
ENSG00000124608	AARS2	-0.165814	0.500205
ENSG00000157426	AASDH	0.171419	0.545599
ENSG00000149313	AASDHPPT	0.226382	0.153223
ENSG00000008311	AASS	0.315127	0.0222004
ENSG00000275700	AATF	0.000397479	0.999231
ENSG00000181409	AATK	0.0290332	0.978828
ENSG00000183044	ABAT	0.743902	6.25073e-05
ENSG00000165029	ABCA1	0.408167	0.000813795
ENSG00000154263	ABCA10	-0.644224	0.139929
ENSG00000144452	ABCA12	-2.37358	0.00748504
ENSG00000179869	ABCA13	-1.39138	0.0534768
ENSG00000107331	ABCA2	0.0246916	0.92397
ENSG00000167972	ABCA3	0.612189	0.0108833
ENSG00000198691	ABCA4	2.0326	9.57796e-11
ENSG00000154265	ABCA5	0.152027	0.63763
ENSG00000154262	ABCA6	1.97578	9.47829e-51
ENSG00000064687	ABCA7	0.412232	0.0961147
ENSG00000141338	ABCA8	3.58276	1.14088e-163
ENSG00000154258	ABCA9	1.04937	7.60652e-17
ENSG00000085563	ABCB1	-1.06369	0.138689
ENSG00000135776	ABCB10	0.110652	0.660973
ENSG00000005471	ABCB4	-1.21196	0.140547
ENSG00000004846	ABCB5	-1.33566	0.0304916
ENSG00000115657	ABCB6	0.301491	0.522438
ENSG00000131269	ABCB7	0.0765938	0.794814
ENSG00000197150	ABCB8	-0.0079283	0.983821
ENSG00000150967	ABCB9	-0.0939902	0.773072
ENSG00000103222	ABCC1	-0.0999227	0.634177
ENSG00000124574	ABCC10	0.0153271	0.959754
ENSG00000121270	ABCC11	0.0233538	0.995038
ENSG00000023839	ABCC2	-0.0663044	0.928536
ENSG00000108846	ABCC3	0.436154	0.000316043
ENSG00000125257	ABCC4	-0.748958	1.93013e-11
ENSG00000114770	ABCC5	0.16919	0.392367
ENSG00000091262	ABCC6	0.653797	0.484114
ENSG00000069431	ABCC9	1.28504	1.96372e-23
ENSG00000101986	ABCD1	0.12355	0.54954
ENSG00000173208	ABCD2	0.648046	0.362505
ENSG00000117528	ABCD3	0.271026	0.0587386
ENSG00000119688	ABCD4	-0.0754078	0.778441
ENSG00000164163	ABCE1	-0.139269	0.431664
ENSG00000204574	ABCF1	-0.0654413	0.77603
ENSG00000033050	ABCF2	-0.0974765	0.699771
ENSG00000161204	ABCF3	0.0215775	0.937684
ENSG00000160179	ABCG1	0.999438	4.26266e-07
ENSG00000118777	ABCG2	-0.688962	0.0165964
ENSG00000172350	ABCG4	0.249411	0.646351
ENSG00000143994	ABHD1	1.15575	0.353848
ENSG00000144827	ABHD10	0.0388583	0.911549
ENSG00000106077	ABHD11	-0.430991	0.081202
ENSG00000100997	ABHD12	-0.196793	0.195019
ENSG00000139826	ABHD13	0.208784	0.300928
ENSG00000248487	ABHD14A	0.432659	0.04203
ENSG00000114779	ABHD14B	0.0331019	0.908632
ENSG00000168792	ABHD15	0.272542	0.134442
ENSG00000183260	ABHD16B	0.608551	0.398143
ENSG00000129968	ABHD17A	0.0211873	0.941828
ENSG00000107362	ABHD17B	-0.123435	0.632338
ENSG00000136379	ABHD17C	0.190469	0.357682
ENSG00000164074	ABHD18	0.00675883	0.992443
ENSG00000140526	ABHD2	-0.291663	0.0258299
ENSG00000158201	ABHD3	0.119628	0.751572
ENSG00000100439	ABHD4	-0.366773	0.00282694
ENSG00000011198	ABHD5	0.838288	5.31882e-12
ENSG00000163686	ABHD6	-0.0900099	0.779758
ENSG00000127220	ABHD8	0.120688	0.612017
ENSG00000136754	ABI1	-0.101531	0.610476
ENSG00000138443	ABI2	-0.116516	0.525859
ENSG00000108798	ABI3	-1.75394	0.0303292
ENSG00000154175	ABI3BP	0.466206	0.0249804
ENSG00000119328	ABITRAM	0.300882	0.128339
ENSG00000097007	ABL1	0.424262	0.000613403
ENSG00000143322	ABL2	-0.664497	2.56545e-09
ENSG00000099204	ABLIM1	0.705764	2.1057e-09
ENSG00000163995	ABLIM2	1.79726	0.00728651
ENSG00000173210	ABLIM3	-0.301318	0.0196837
ENSG00000159842	ABR	-0.171645	0.378209
ENSG00000146386	ABRACL	-0.10243	0.714774
ENSG00000163322	ABRAXAS1	0.141277	0.555366
ENSG00000165660	ABRAXAS2	0.0554922	0.837282
ENSG00000146109	ABT1	-0.0339834	0.916395
ENSG00000114626	ABTB1	-0.00490439	0.993526
ENSG00000166016	ABTB2	0.816363	9.72256e-10
ENSG00000151136	ABTB3	-0.217615	0.799687
ENSG00000284874	AC000093.1	-0.448744	0.38598
ENSG00000268533	AC003002.2	0.10015	0.916619
ENSG00000282936	AC004706.4	-0.249129	0.487496
ENSG00000159239	AC005041.1	0.07935	0.949846
ENSG00000258653	AC005520.1	-0.538298	0.689761
ENSG00000264324	AC006030.1	0.431854	0.499742
ENSG00000243696	AC006254.1	0.420031	0.574615
ENSG00000258881	AC007040.2	0.0124574	0.998633
ENSG00000267140	AC007998.2	0.0470879	0.987532
ENSG00000268655	AC008687.4	-2.15654	0.00527014
ENSG00000260729	AC009690.1	-0.836824	0.283022
ENSG00000258311	AC009779.3	-0.257789	0.601675
ENSG00000269476	AC010326.2	0.843153	0.0509004
ENSG00000258674	AC011448.1	-0.0682062	0.971553
ENSG00000258461	AC012651.1	0.428405	0.588629
ENSG00000173867	AC013489.1	-0.620396	0.433211
ENSG00000284526	AC015802.6	0.535724	0.48098
ENSG00000273398	AC017083.3	-0.05558	0.941947
ENSG00000275778	AC018630.2	-0.194444	0.805502
ENSG00000269825	AC022150.4	-0.348106	0.266971
ENSG00000272410	AC022384.1	0.540745	0.702375
ENSG00000272916	AC022400.6	0.121737	0.870144
ENSG00000285218	AC026316.5	-1.15084	0.49003
ENSG00000284461	AC027644.4	0.697695	0.636905
ENSG00000276418	AC036214.3	1.28124	0.152611
ENSG00000261884	AC040162.1	-1.69725	0.0138428
ENSG00000250644	AC068580.4	-0.276626	0.798425
ENSG00000284946	AC068831.7	-1.6012	0.00270812
ENSG00000258539	AC068896.1	0.855778	0.499297
ENSG00000284820	AC068946.2	0.314021	0.849521
ENSG00000284691	AC073111.5	-0.281633	0.333899
ENSG00000264058	AC073508.2	1.75398	0.155755
ENSG00000272822	AC073610.3	0.351391	0.741243
ENSG00000265690	AC074143.1	-0.229798	0.849068
ENSG00000241962	AC079447.1	0.436633	0.615679
ENSG00000267127	AC090360.1	-0.0742912	0.938655
ENSG00000285253	AC090517.4	0.610737	0.197386
ENSG00000261147	AC091167.2	0.4574	0.807205
ENSG00000267699	AC091551.1	-0.396248	0.705554
ENSG00000249773	AC092647.5	-0.699358	0.637096
ENSG00000260643	AC092718.3	0.915182	0.565108
ENSG00000284512	AC092718.8	1.5105	0.153956
ENSG00000267561	AC093155.3	1.32969	0.0187448
ENSG00000170846	AC093323.1	0.164736	0.508971
ENSG00000285458	AC093827.5	0.396113	0.380177
ENSG00000272305	AC096887.1	0.399047	0.753095
ENSG00000283563	AC098650.1	-0.106242	0.945619
ENSG00000266302	AC098850.3	-0.599783	0.324864
ENSG00000188897	AC099489.1	0.361901	0.547313
ENSG00000239920	AC104389.4	0.75704	0.608012
ENSG00000284952	AC104472.3	0.792691	0.602254
ENSG00000284773	AC114490.3	0.782781	0.0492588
ENSG00000283782	AC116366.3	0.491841	0.454877
ENSG00000284686	AC119674.2	1.94845	0.0940766
ENSG00000241489	AC244197.3	0.166236	0.913778
ENSG00000060971	ACAA1	-0.0353612	0.894661
ENSG00000167315	ACAA2	-0.0258252	0.929766
ENSG00000278540	ACACA	-0.566639	1.4092e-06
ENSG00000076555	ACACB	0.993475	7.92282e-08
ENSG00000111271	ACAD10	-0.107689	0.707526
ENSG00000240303	ACAD11	-0.543514	0.161657
ENSG00000151498	ACAD8	-0.0587735	0.846335
ENSG00000177646	ACAD9	-0.272921	0.0650523
ENSG00000117054	ACADM	-0.0582494	0.837126
ENSG00000122971	ACADS	0.185958	0.538964
ENSG00000196177	ACADSB	0.309214	0.0990392
ENSG00000072778	ACADVL	-0.179676	0.255319
ENSG00000072818	ACAP1	0.0464806	0.946161
ENSG00000114331	ACAP2	0.0427082	0.856023
ENSG00000131584	ACAP3	-0.201162	0.219757
ENSG00000075239	ACAT1	-0.0023193	0.998057
ENSG00000120437	ACAT2	-0.831526	9.1766e-13
ENSG00000182827	ACBD3	0.150174	0.37169
ENSG00000181513	ACBD4	0.33533	0.19658
ENSG00000107897	ACBD5	-0.0814203	0.745962
ENSG00000230124	ACBD6	-0.319061	0.0196511
ENSG00000176244	ACBD7	-0.56661	0.251189
ENSG00000110455	ACCS	-0.0042379	0.997804
ENSG00000102977	ACD	-0.190182	0.48303
ENSG00000159640	ACE	0.353462	0.119246
ENSG00000167769	ACER1	0.268848	0.893606
ENSG00000177076	ACER2	1.13315	4.38479e-07
ENSG00000078124	ACER3	0.723332	2.84061e-10
ENSG00000087085	ACHE	-1.07825	0.00372939
ENSG00000100813	ACIN1	-0.0664567	0.764946
ENSG00000144648	ACKR2	0.125596	0.935517
ENSG00000144476	ACKR3	2.15033	5.32644e-27
ENSG00000129048	ACKR4	-1.8642	1.67697e-10
ENSG00000131473	ACLY	0.0650343	0.78023
ENSG00000122729	ACO1	0.0505139	0.827163
ENSG00000100412	ACO2	-0.17368	0.271671
ENSG00000184227	ACOT1	0.696315	0.000651456
ENSG00000162390	ACOT11	-0.386779	0.300137
ENSG00000172497	ACOT12	-0.497944	0.806308
ENSG00000112304	ACOT13	-0.000944019	0.999178
ENSG00000119673	ACOT2	0.50854	0.000317039
ENSG00000177465	ACOT4	-0.478859	0.523396
ENSG00000097021	ACOT7	-0.13714	0.484471
ENSG00000101473	ACOT8	-0.0397306	0.910781
ENSG00000123130	ACOT9	-0.0919927	0.652831
ENSG00000161533	ACOX1	0.0596936	0.793843
ENSG00000168306	ACOX2	0.259198	0.238246
ENSG00000087008	ACOX3	-0.045756	0.879958
ENSG00000143727	ACP1	0.0262537	0.922457
ENSG00000134575	ACP2	0.113563	0.558769
ENSG00000014257	ACP3	0.806236	0.0231175
ENSG00000102575	ACP5	-1.53681	7.58601e-14
ENSG00000162836	ACP6	-0.00608712	0.995249
ENSG00000100312	ACR	-0.350665	0.828607
ENSG00000111644	ACRBP	0.143398	0.896315
ENSG00000103740	ACSBG1	0.826176	0.338022
ENSG00000167107	ACSF2	-0.348337	0.0412329
ENSG00000176715	ACSF3	-0.0809933	0.785083
ENSG00000151726	ACSL1	0.762457	2.42722e-12
ENSG00000123983	ACSL3	-0.177162	0.268888
ENSG00000068366	ACSL4	-0.0227435	0.929815
ENSG00000197142	ACSL5	-0.248754	0.329923
ENSG00000005187	ACSM3	-0.252241	0.776715
ENSG00000183549	ACSM5	1.24296	0.0965789
ENSG00000154930	ACSS1	-0.0348668	0.928986
ENSG00000131069	ACSS2	-0.0989096	0.658455
ENSG00000111058	ACSS3	-0.223355	0.329534
ENSG00000143632	ACTA1	-0.122013	0.932423
ENSG00000107796	ACTA2	0.413078	0.00203005
ENSG00000075624	ACTB	-0.0136106	0.964714
ENSG00000169067	ACTBL2	-0.477979	0.384706
ENSG00000159251	ACTC1	-0.880057	0.000360751
ENSG00000184009	ACTG1	-0.236852	0.14496
ENSG00000163017	ACTG2	-0.345253	0.00766828
ENSG00000288649	ACTL10	0.165437	0.747103
ENSG00000136518	ACTL6A	-0.29591	0.046283
ENSG00000188493	ACTMAP	-0.0750611	0.829721
ENSG00000072110	ACTN1	-0.260356	0.0871686
ENSG00000077522	ACTN2	0.801052	0.508237
ENSG00000248746	ACTN3	-0.866051	0.598354
ENSG00000130402	ACTN4	-0.472106	0.000213381
ENSG00000131966	ACTR10	-0.00573974	0.988759
ENSG00000138107	ACTR1A	-0.0873985	0.674198
ENSG00000115073	ACTR1B	-0.172993	0.278712
ENSG00000138071	ACTR2	-0.171013	0.313695
ENSG00000115091	ACTR3	-0.252007	0.085504
ENSG00000133627	ACTR3B	-0.603559	0.0149187
ENSG00000106526	ACTR3C	-0.111511	0.830263
ENSG00000101442	ACTR5	-0.235439	0.454786
ENSG00000075089	ACTR6	-0.0501721	0.886971
ENSG00000113812	ACTR8	-0.145792	0.439141
ENSG00000184378	ACTRT3	0.218107	0.48808
ENSG00000115170	ACVR1	-0.1158	0.532682
ENSG00000135503	ACVR1B	-0.0201189	0.946955
ENSG00000123612	ACVR1C	-1.29519	0.000992073
ENSG00000121989	ACVR2A	0.0592268	0.858489
ENSG00000114739	ACVR2B	0.129339	0.730363
ENSG00000139567	ACVRL1	-0.552602	0.00362647
ENSG00000243989	ACY1	-0.347148	0.364055
ENSG00000132744	ACY3	-0.398512	0.790522
ENSG00000119640	ACYP1	0.189436	0.559972
ENSG00000170634	ACYP2	0.242333	0.299891
ENSG00000267120	AD000671.2	-0.37339	0.754976
ENSG00000196839	ADA	-0.030489	0.94407
ENSG00000093072	ADA2	-0.382024	0.0348235
ENSG00000168803	ADAL	-0.0737798	0.847372
ENSG00000137845	ADAM10	0.0517794	0.82338
ENSG00000073670	ADAM11	-0.512595	0.172967
ENSG00000148848	ADAM12	-0.88004	2.57623e-14
ENSG00000143537	ADAM15	0.271135	0.0449586
ENSG00000151694	ADAM17	0.130675	0.471258
ENSG00000135074	ADAM19	-0.774687	8.5263e-12
ENSG00000134007	ADAM20	0.346446	0.857483
ENSG00000139985	ADAM21	0.207363	0.806138
ENSG00000008277	ADAM22	0.331356	0.440428
ENSG00000114948	ADAM23	-0.180884	0.416812
ENSG00000042980	ADAM28	-0.269175	0.904794
ENSG00000197140	ADAM32	0.0723796	0.926104
ENSG00000149451	ADAM33	0.446372	0.000156704
ENSG00000151651	ADAM8	-0.840913	0.0159432
ENSG00000168615	ADAM9	0.310963	0.020713
ENSG00000154734	ADAMTS1	1.8413	4.73069e-60
ENSG00000142303	ADAMTS10	-0.0590278	0.835824
ENSG00000151388	ADAMTS12	-0.497794	1.37349e-05
ENSG00000160323	ADAMTS13	-0.202837	0.619372
ENSG00000138316	ADAMTS14	-0.946527	2.56801e-05
ENSG00000166106	ADAMTS15	1.89194	7.93356e-12
ENSG00000145536	ADAMTS16	-1.68591	2.24968e-07
ENSG00000140470	ADAMTS17	-0.773018	0.609059
ENSG00000145808	ADAMTS19	-1.0959	0.000530947
ENSG00000087116	ADAMTS2	0.502264	4.17332e-05
ENSG00000156140	ADAMTS3	0.0901418	0.839299
ENSG00000158859	ADAMTS4	-0.0406592	0.881329
ENSG00000154736	ADAMTS5	0.103698	0.597428
ENSG00000049192	ADAMTS6	0.348381	0.0096113
ENSG00000136378	ADAMTS7	-0.0581391	0.799067
ENSG00000134917	ADAMTS8	2.1493	4.49917e-07
ENSG00000163638	ADAMTS9	1.38333	8.10252e-13
ENSG00000178031	ADAMTSL1	-0.978989	0.00125878
ENSG00000197859	ADAMTSL2	-0.146823	0.934671
ENSG00000143382	ADAMTSL4	1.21441	4.27086e-15
ENSG00000185761	ADAMTSL5	-0.0811178	0.789891
ENSG00000105963	ADAP1	0.731409	0.000567202
ENSG00000184060	ADAP2	-0.839806	0.0144887
ENSG00000160710	ADAR	0.0177135	0.947848
ENSG00000197381	ADARB1	1.14813	2.27637e-25
ENSG00000065457	ADAT1	-0.269309	0.0834377
ENSG00000189007	ADAT2	-0.616809	0.0224949
ENSG00000213638	ADAT3	0.16132	0.688973
ENSG00000063761	ADCK1	-0.023224	0.95764
ENSG00000133597	ADCK2	0.0370039	0.923338
ENSG00000173137	ADCK5	-0.268084	0.351997
ENSG00000164742	ADCY1	0.914811	1.7485e-05
ENSG00000143199	ADCY10	0.404888	0.771057
ENSG00000078295	ADCY2	-0.987815	0.0213867
ENSG00000138031	ADCY3	0.413872	0.000504859
ENSG00000129467	ADCY4	-1.34232	1.81614e-07
ENSG00000173175	ADCY5	-0.543241	0.0919209
ENSG00000174233	ADCY6	-0.0476336	0.837813
ENSG00000121281	ADCY7	-0.0720731	0.768228
ENSG00000155897	ADCY8	0.0935059	0.94028
ENSG00000162104	ADCY9	-0.300119	0.0214353
ENSG00000087274	ADD1	0.0745272	0.73973
ENSG00000148700	ADD3	0.405233	0.000685525
ENSG00000020181	ADGRA2	-0.565486	2.40275e-06
ENSG00000152990	ADGRA3	0.169993	0.316761
ENSG00000181790	ADGRB1	-0.766497	0.344257
ENSG00000121753	ADGRB2	-0.886176	1.04365e-11
ENSG00000135298	ADGRB3	2.17356	1.37362e-05
ENSG00000111452	ADGRD1	-0.555601	7.49125e-06
ENSG00000127507	ADGRE2	-0.45304	0.283753
ENSG00000123146	ADGRE5	-0.0593871	0.797128
ENSG00000173567	ADGRF3	0.400146	0.720678
ENSG00000153294	ADGRF4	1.2571	9.24372e-07
ENSG00000205336	ADGRG1	-0.0452236	0.925626
ENSG00000112414	ADGRG6	0.687449	6.11091e-09
ENSG00000072071	ADGRL1	-0.0936343	0.739772
ENSG00000117114	ADGRL2	-0.19661	0.276425
ENSG00000150471	ADGRL3	1.60222	4.12866e-14
ENSG00000162618	ADGRL4	-0.845071	0.0011117
ENSG00000196616	ADH1B	3.20305	2.23088e-27
ENSG00000248144	ADH1C	1.60471	1.24585e-05
ENSG00000197894	ADH5	0.347901	0.0072284
ENSG00000147576	ADHFE1	0.762929	0.0621368
ENSG00000182551	ADI1	0.425291	0.000673337
ENSG00000159346	ADIPOR1	0.185705	0.229035
ENSG00000006831	ADIPOR2	-0.0503608	0.823405
ENSG00000148671	ADIRF	0.196447	0.701275
ENSG00000101220	ADISSP	0.407705	0.00349154
ENSG00000156110	ADK	-0.113694	0.605224
ENSG00000148926	ADM	0.469893	0.000102408
ENSG00000128165	ADM2	-0.29872	0.0262328
ENSG00000224420	ADM5	-0.174484	0.904974
ENSG00000101126	ADNP	-0.193879	0.20403
ENSG00000101544	ADNP2	-0.212826	0.240645
ENSG00000181915	ADO	-0.196809	0.217448
ENSG00000163485	ADORA1	-0.248154	0.305113
ENSG00000128271	ADORA2A	4.93089	0.00172171
ENSG00000170425	ADORA2B	-0.563752	0.0272659
ENSG00000159322	ADPGK	0.265115	0.0665904
ENSG00000144843	ADPRH	0.0292448	0.948371
ENSG00000153531	ADPRHL1	0.381914	0.139929
ENSG00000170222	ADPRM	-0.0470369	0.912325
ENSG00000116863	ADPRS	-0.0636241	0.803503
ENSG00000170214	ADRA1B	1.72308	2.81613e-12
ENSG00000171873	ADRA1D	-1.10986	2.24587e-09
ENSG00000150594	ADRA2A	0.173214	0.3013
ENSG00000184160	ADRA2C	5.56684	0
ENSG00000169252	ADRB2	1.8114	4.03524e-05
ENSG00000130706	ADRM1	-0.17628	0.261836
ENSG00000239900	ADSL	-0.109459	0.746639
ENSG00000185100	ADSS1	0.0981041	0.857483
ENSG00000035687	ADSS2	-0.376152	0.00254984
ENSG00000111863	ADTRP	-1.3372	0.00137703
ENSG00000106624	AEBP1	-0.586907	8.32077e-07
ENSG00000139154	AEBP2	-0.274192	0.0745324
ENSG00000181026	AEN	-0.572536	1.18767e-06
ENSG00000196526	AFAP1	0.14429	0.431238
ENSG00000157510	AFAP1L1	-0.460726	0.003324
ENSG00000169129	AFAP1L2	-2.34081	3.27314e-60
ENSG00000130396	AFDN	-0.0979054	0.642829
ENSG00000172493	AFF1	0.189161	0.215649
ENSG00000155966	AFF2	-0.428133	0.799781
ENSG00000144218	AFF3	-0.759142	8.73218e-11
ENSG00000072364	AFF4	-0.00894355	0.978721
ENSG00000135537	AFG1L	0.17138	0.65471
ENSG00000141385	AFG3L2	-0.0698857	0.754976
ENSG00000183077	AFMID	-0.0921767	0.775459
ENSG00000081051	AFP	-0.155682	0.909647
ENSG00000119844	AFTPH	0.0874915	0.720056
ENSG00000038002	AGA	0.230041	0.187731
ENSG00000157985	AGAP1	-0.210518	0.19348
ENSG00000135439	AGAP2	0.0915937	0.872348
ENSG00000133612	AGAP3	-0.204136	0.176489
ENSG00000188234	AGAP4	-0.228471	0.734903
ENSG00000172650	AGAP5	-0.730262	0.345342
ENSG00000204149	AGAP6	0.82139	0.329155
ENSG00000204172	AGAP9	-0.206416	0.696881
ENSG00000165923	AGBL2	0.411033	0.475895
ENSG00000146856	AGBL3	0.590179	0.278098
ENSG00000084693	AGBL5	-0.141812	0.496467
ENSG00000204305	AGER	0.205347	0.764608
ENSG00000173744	AGFG1	-0.0381449	0.877589
ENSG00000106351	AGFG2	0.851694	1.63801e-07
ENSG00000164252	AGGF1	-6.2688e-05	0.999814
ENSG00000006530	AGK	-0.085073	0.800098
ENSG00000162688	AGL	0.376172	0.00985317
ENSG00000116771	AGMAT	-0.39593	0.212205
ENSG00000092847	AGO1	-0.0924722	0.652819
ENSG00000123908	AGO2	-0.155819	0.348476
ENSG00000126070	AGO3	0.164619	0.382229
ENSG00000134698	AGO4	-0.0517718	0.857499
ENSG00000204310	AGPAT1	0.284865	0.118459
ENSG00000169692	AGPAT2	0.272031	0.0568129
ENSG00000160216	AGPAT3	-0.178827	0.268888
ENSG00000026652	AGPAT4	0.162696	0.393174
ENSG00000155189	AGPAT5	-0.173859	0.487496
ENSG00000018510	AGPS	0.0806022	0.704676
ENSG00000188157	AGRN	-0.12496	0.514697
ENSG00000135744	AGT	-1.16441	2.44023e-05
ENSG00000135049	AGTPBP1	0.693808	0.000168466
ENSG00000144891	AGTR1	0.326174	0.670569
ENSG00000177674	AGTRAP	0.403013	0.00893301
ENSG00000153207	AHCTF1	0.0617672	0.808824
ENSG00000101444	AHCY	-0.0530739	0.814413
ENSG00000168710	AHCYL1	0.0853548	0.68321
ENSG00000158467	AHCYL2	-0.204016	0.340167
ENSG00000126705	AHDC1	-0.394866	0.00149217
ENSG00000135541	AHI1	0.41168	0.00711905
ENSG00000124942	AHNAK	-0.0463851	0.856879
ENSG00000185567	AHNAK2	-0.1591	0.352317
ENSG00000106546	AHR	-0.0305428	0.927061
ENSG00000063438	AHRR	-0.735838	0.147024
ENSG00000100591	AHSA1	0.00176887	0.99839
ENSG00000186063	AIDA	0.0142849	0.962567
ENSG00000126878	AIF1L	0.789485	0.219757
ENSG00000156709	AIFM1	-0.0581596	0.820284
ENSG00000042286	AIFM2	0.0634035	0.808824
ENSG00000183773	AIFM3	-0.206983	0.762315
ENSG00000146416	AIG1	0.0332608	0.912162
ENSG00000164022	AIMP1	-0.199344	0.212686
ENSG00000106305	AIMP2	0.0255274	0.929766
ENSG00000110711	AIP	-0.0235478	0.931188
ENSG00000160224	AIRE	0.905974	0.525537
ENSG00000196581	AJAP1	-0.0561446	0.929766
ENSG00000232434	AJM1	0.25063	0.366596
ENSG00000129474	AJUBA	-0.608816	4.7998e-08
ENSG00000106992	AK1	0.24765	0.257609
ENSG00000004455	AK2	-0.0449218	0.849906
ENSG00000147853	AK3	0.416356	0.000511543
ENSG00000162433	AK4	0.98623	0.000819722
ENSG00000233381	AK4P3	-0.0820856	0.937582
ENSG00000154027	AK5	-1.324	2.30519e-28
ENSG00000085231	AK6	-0.213103	0.562891
ENSG00000140057	AK7	1.32861	0.0599924
ENSG00000165695	AK8	0.596257	0.282529
ENSG00000155085	AK9	0.211661	0.586948
ENSG00000121057	AKAP1	-0.039118	0.906949
ENSG00000108599	AKAP10	0.0768029	0.745431
ENSG00000023516	AKAP11	-0.0171887	0.947749
ENSG00000131016	AKAP12	0.172526	0.322991
ENSG00000170776	AKAP13	0.458829	0.000157685
ENSG00000111254	AKAP3	0.099623	0.911191
ENSG00000179841	AKAP5	0.424838	0.0886679
ENSG00000151320	AKAP6	-0.699571	0.0222479
ENSG00000118507	AKAP7	0.287573	0.404609
ENSG00000105127	AKAP8	-0.0432142	0.881501
ENSG00000011243	AKAP8L	-0.0974804	0.648752
ENSG00000127914	AKAP9	0.149031	0.392297
ENSG00000166452	AKIP1	-0.155409	0.385043
ENSG00000174574	AKIRIN1	0.0020702	0.998329
ENSG00000135334	AKIRIN2	0.0494444	0.837603
ENSG00000106948	AKNA	-0.4358	0.000525466
ENSG00000162641	AKNAD1	-0.139827	0.872348
ENSG00000117448	AKR1A1	0.0845564	0.683377
ENSG00000085662	AKR1B1	-0.0694186	0.74794
ENSG00000198074	AKR1B10	0.301118	0.616874
ENSG00000227471	AKR1B15	-1.03532	0.460646
ENSG00000187134	AKR1C1	1.16274	7.18393e-10
ENSG00000151632	AKR1C2	0.814249	0.00323124
ENSG00000196139	AKR1C3	0.599885	0.0361203
ENSG00000165568	AKR1E2	-0.337878	0.358893
ENSG00000053371	AKR7A2	-0.0684084	0.767675
ENSG00000162482	AKR7A3	0.244593	0.766494
ENSG00000211454	AKR7L	-0.526918	0.629362
ENSG00000142208	AKT1	-0.0669336	0.766619
ENSG00000204673	AKT1S1	-0.111316	0.552492
ENSG00000105221	AKT2	-0.0395671	0.870451
ENSG00000117020	AKT3	-0.157544	0.487357
ENSG00000166971	AKTIP	0.178969	0.454989
ENSG00000276302	AL021997.3	-0.169072	0.931188
ENSG00000284431	AL022238.4	0.195702	0.813605
ENSG00000261732	AL031708.1	-0.132026	0.93704
ENSG00000282988	AL031777.3	0.2954	0.673925
ENSG00000256566	AL049650.1	-0.598853	0.510455
ENSG00000258466	AL049779.1	-0.595271	0.349218
ENSG00000258790	AL121594.1	0.83227	0.50929
ENSG00000261582	AL121753.1	-0.140553	0.803917
ENSG00000273154	AL121845.3	-0.317362	0.562669
ENSG00000259529	AL136295.5	-0.279676	0.73632
ENSG00000257524	AL157935.2	0.428614	0.521995
ENSG00000285269	AL160269.1	0.0788075	0.904801
ENSG00000187186	AL162231.1	0.173386	0.834009
ENSG00000285444	AL162377.3	-0.885419	0.16625
ENSG00000285130	AL358113.1	-0.407079	0.716512
ENSG00000273167	AL359736.1	1.44195	0.26668
ENSG00000124593	AL365205.1	0.575945	0.223079
ENSG00000273088	AL713999.1	0.189991	0.877439
ENSG00000148218	ALAD	0.326747	0.0149824
ENSG00000023330	ALAS1	0.0473098	0.844552
ENSG00000170017	ALCAM	-0.262381	0.0551353
ENSG00000161618	ALDH16A1	0.0950959	0.722323
ENSG00000059573	ALDH18A1	0.381699	0.001948
ENSG00000165092	ALDH1A1	1.88031	7.7217e-58
ENSG00000128918	ALDH1A2	-0.048034	0.853111
ENSG00000184254	ALDH1A3	-0.197559	0.590472
ENSG00000137124	ALDH1B1	-0.521855	6.99467e-06
ENSG00000144908	ALDH1L1	1.99411	2.26319e-07
ENSG00000136010	ALDH1L2	0.238405	0.105463
ENSG00000111275	ALDH2	1.58393	1.88864e-47
ENSG00000072210	ALDH3A2	0.362118	0.00712401
ENSG00000006534	ALDH3B1	0.805327	1.25151e-12
ENSG00000159423	ALDH4A1	-0.0952605	0.701602
ENSG00000112294	ALDH5A1	0.210019	0.38598
ENSG00000119711	ALDH6A1	0.407141	0.00823102
ENSG00000164904	ALDH7A1	-0.0851899	0.683257
ENSG00000118514	ALDH8A1	1.18956	0.00976918
ENSG00000143149	ALDH9A1	-0.0777315	0.7093
ENSG00000285043	ALDOA	-0.469092	0.194325
ENSG00000149925	ALDOA	-0.0980782	0.731822
ENSG00000136872	ALDOB	1.30772	0.402678
ENSG00000109107	ALDOC	-0.251516	0.302632
ENSG00000033011	ALG1	0.110556	0.584891
ENSG00000139133	ALG10	0.115756	0.800098
ENSG00000175548	ALG10B	0.273513	0.311896
ENSG00000253710	ALG11	0.354304	0.0873169
ENSG00000182858	ALG12	0.0181908	0.951628
ENSG00000101901	ALG13	-0.0680836	0.803917
ENSG00000172339	ALG14	-0.0464273	0.895975
ENSG00000119523	ALG2	0.282905	0.0424281
ENSG00000214160	ALG3	0.45684	0.000539535
ENSG00000120697	ALG5	0.213858	0.203082
ENSG00000088035	ALG6	0.0564098	0.89206
ENSG00000159063	ALG8	0.0446504	0.872517
ENSG00000086848	ALG9	0.387105	0.0581834
ENSG00000196711	ALKAL1	-2.39959	0.000101287
ENSG00000189292	ALKAL2	0.10099	0.935567
ENSG00000100601	ALKBH1	0.0398121	0.919061
ENSG00000189046	ALKBH2	-0.0318179	0.938185
ENSG00000166199	ALKBH3	-0.11247	0.657483
ENSG00000160993	ALKBH4	-0.110772	0.717075
ENSG00000091542	ALKBH5	0.153247	0.36649
ENSG00000239382	ALKBH6	0.0115645	0.992655
ENSG00000125652	ALKBH7	0.332671	0.030949
ENSG00000137760	ALKBH8	-0.247581	0.332006
ENSG00000116127	ALMS1	-0.165453	0.440534
ENSG00000108839	ALOX12	-0.291883	0.849099
ENSG00000179593	ALOX15B	5.30039	0.00050036
ENSG00000132965	ALOX5AP	2.61162	8.26837e-23
ENSG00000179148	ALOXE3	0.190926	0.814754
ENSG00000073331	ALPK1	-0.113682	0.684378
ENSG00000198796	ALPK2	0.198207	0.196437
ENSG00000136383	ALPK3	-0.157615	0.801379
ENSG00000162551	ALPL	-0.22532	0.659848
ENSG00000003393	ALS2	-0.422425	0.00103572
ENSG00000178038	ALS2CL	-0.772081	0.0018006
ENSG00000156150	ALX3	-0.538921	0.706417
ENSG00000052850	ALX4	-0.828234	0.557673
ENSG00000183684	ALYREF	-0.330593	0.0131548
ENSG00000242110	AMACR	0.348707	0.582337
ENSG00000106927	AMBP	0.803596	0.130509
ENSG00000110497	AMBRA1	-0.204159	0.212598
ENSG00000123505	AMD1	0.155393	0.358733
ENSG00000139344	AMDHD1	1.15916	0.199203
ENSG00000162066	AMDHD2	-0.75934	3.76249e-06
ENSG00000184675	AMER1	-0.212774	0.466304
ENSG00000159461	AMFR	0.208727	0.168189
ENSG00000104899	AMH	0.0721722	0.941406
ENSG00000181754	AMIGO1	0.207543	0.403322
ENSG00000139211	AMIGO2	-0.621009	7.31918e-08
ENSG00000101935	AMMECR1	0.0335068	0.902806
ENSG00000144233	AMMECR1L	0.109182	0.580064
ENSG00000166126	AMN	0.664058	0.519141
ENSG00000151743	AMN1	0.0691803	0.879592
ENSG00000126016	AMOT	-0.176373	0.401822
ENSG00000166025	AMOTL1	-0.517701	5.74947e-06
ENSG00000114019	AMOTL2	0.0641281	0.777964
ENSG00000116337	AMPD2	-0.0327975	0.89684
ENSG00000133805	AMPD3	0.118358	0.540278
ENSG00000078053	AMPH	-0.426571	0.0365521
ENSG00000145020	AMT	0.549929	0.621937
ENSG00000240038	AMY2B	0.54165	0.400919
ENSG00000174945	AMZ1	0.287497	0.0950052
ENSG00000196704	AMZ2	-0.125274	0.51036
ENSG00000153107	ANAPC1	-0.148193	0.525859
ENSG00000164162	ANAPC10	0.115019	0.796611
ENSG00000141552	ANAPC11	-0.0503545	0.834009
ENSG00000129055	ANAPC13	0.125527	0.503235
ENSG00000110200	ANAPC15	-0.054937	0.832772
ENSG00000166295	ANAPC16	0.305805	0.0212276
ENSG00000176248	ANAPC2	0.00816414	0.984645
ENSG00000053900	ANAPC4	0.0462884	0.888113
ENSG00000089053	ANAPC5	0.0219441	0.932324
ENSG00000196510	ANAPC7	-0.142675	0.468097
ENSG00000214274	ANG	1.13486	2.88876e-07
ENSG00000013523	ANGEL1	-0.0327181	0.923338
ENSG00000174606	ANGEL2	-0.00872172	0.983595
ENSG00000154188	ANGPT1	1.33815	7.30093e-33
ENSG00000091879	ANGPT2	3.03012	3.32237e-10
ENSG00000101280	ANGPT4	2.14552	0.108681
ENSG00000116194	ANGPTL1	2.29724	1.84744e-13
ENSG00000136859	ANGPTL2	-0.257146	0.0650523
ENSG00000167772	ANGPTL4	0.773378	5.20201e-05
ENSG00000187151	ANGPTL5	1.00225	0.568129
ENSG00000130812	ANGPTL6	0.0652098	0.940112
ENSG00000130173	ANGPTL8	0.103347	0.955628
ENSG00000029534	ANK1	-0.500505	0.147933
ENSG00000145362	ANK2	-0.431999	0.00186407
ENSG00000151150	ANK3	-0.682463	0.0233895
ENSG00000151687	ANKAR	0.422186	0.204952
ENSG00000166839	ANKDD1A	0.196985	0.546094
ENSG00000189045	ANKDD1B	1.14964	0.0233921
ENSG00000132623	ANKEF1	0.203452	0.689761
ENSG00000185722	ANKFY1	0.0933838	0.638748
ENSG00000154122	ANKH	0.584537	7.87877e-07
ENSG00000131503	ANKHD1	-0.017622	0.979347
ENSG00000254996	ANKHD1-EIF4EBP3	0.224263	0.806471
ENSG00000001629	ANKIB1	-0.0616224	0.781632
ENSG00000160117	ANKLE1	0.565027	0.211781
ENSG00000176915	ANKLE2	-0.0736312	0.733522
ENSG00000144504	ANKMY1	-0.102019	0.796197
ENSG00000106524	ANKMY2	-0.284007	0.130316
ENSG00000164331	ANKRA2	0.148538	0.560611
ENSG00000148677	ANKRD1	-0.195255	0.718648
ENSG00000088448	ANKRD10	0.275032	0.0720335
ENSG00000167522	ANKRD11	-0.197384	0.211998
ENSG00000101745	ANKRD12	-0.247404	0.135095
ENSG00000076513	ANKRD13A	-0.343998	0.00683257
ENSG00000198720	ANKRD13B	-0.0409169	0.914464
ENSG00000118454	ANKRD13C	-0.0179589	0.949963
ENSG00000172932	ANKRD13D	-0.17321	0.411613
ENSG00000134461	ANKRD16	-0.163247	0.642959
ENSG00000132466	ANKRD17	-0.00367102	0.99458
ENSG00000230453	ANKRD18B	-1.44928	0.0452686
ENSG00000165887	ANKRD2	-0.148813	0.889998
ENSG00000163126	ANKRD23	0.064608	0.914252
ENSG00000089847	ANKRD24	0.0831317	0.904732
ENSG00000107890	ANKRD26	-0.0239474	0.947749
ENSG00000105186	ANKRD27	0.029772	0.916395
ENSG00000206560	ANKRD28	-0.275264	0.0402675
ENSG00000154065	ANKRD29	0.761362	0.0616741
ENSG00000148513	ANKRD30A	0.287545	0.717032
ENSG00000180777	ANKRD30B	-1.11104	0.0153997
ENSG00000145700	ANKRD31	-0.00157912	0.999231
ENSG00000164236	ANKRD33B	0.782483	7.04089e-09
ENSG00000272031	ANKRD34A	-1.02691	3.21161e-08
ENSG00000198483	ANKRD35	0.0901656	0.803838
ENSG00000135976	ANKRD36	0.0801271	0.880691
ENSG00000196912	ANKRD36B	-0.30946	0.511144
ENSG00000174501	ANKRD36C	-0.287982	0.383961
ENSG00000186352	ANKRD37	0.630339	0.014248
ENSG00000213337	ANKRD39	0.00434908	0.99769
ENSG00000154945	ANKRD40	-0.16896	0.289772
ENSG00000137494	ANKRD42	0.0941842	0.743334
ENSG00000065413	ANKRD44	0.335194	0.207115
ENSG00000183831	ANKRD45	1.43776	0.0457347
ENSG00000186106	ANKRD46	0.0299752	0.943449
ENSG00000168876	ANKRD49	0.0308348	0.93978
ENSG00000151458	ANKRD50	0.39254	0.00125896
ENSG00000139645	ANKRD52	-0.219721	0.135317
ENSG00000144031	ANKRD53	-0.190844	0.699771
ENSG00000100124	ANKRD54	0.150911	0.506415
ENSG00000135299	ANKRD6	-0.150358	0.824359
ENSG00000157999	ANKRD61	-0.718704	0.334067
ENSG00000230778	ANKRD63	0.582307	0.767661
ENSG00000235098	ANKRD65	-0.0847406	0.869991
ENSG00000106013	ANKRD7	1.0615	0.0885442
ENSG00000156381	ANKRD9	-0.0723774	0.789106
ENSG00000064999	ANKS1A	0.311239	0.0345045
ENSG00000185046	ANKS1B	0.750293	0.52103
ENSG00000168096	ANKS3	0.0561952	0.8606
ENSG00000165138	ANKS6	-0.074756	0.76747
ENSG00000163516	ANKZF1	-0.0205302	0.953648
ENSG00000011426	ANLN	-0.99041	1.59502e-11
ENSG00000131620	ANO1	-2.59064	5.45446e-39
ENSG00000160746	ANO10	-0.157116	0.344257
ENSG00000047617	ANO2	-1.62403	0.0224474
ENSG00000134343	ANO3	2.02079	2.00607e-06
ENSG00000151572	ANO4	0.208841	0.347325
ENSG00000171714	ANO5	1.46259	0.33847
ENSG00000177119	ANO6	-0.308751	0.019499
ENSG00000146205	ANO7	-0.299161	0.489059
ENSG00000074855	ANO8	0.151133	0.609836
ENSG00000011201	ANOS1	-0.935173	4.06709e-12
ENSG00000140350	ANP32A	-0.166457	0.306868
ENSG00000136938	ANP32B	-0.16756	0.31297
ENSG00000139223	ANP32D	1.79111	0.148384
ENSG00000143401	ANP32E	-0.382218	0.00509255
ENSG00000166825	ANPEP	0.040137	0.868332
ENSG00000103254	ANTKMT	0.00446366	0.995785
ENSG00000169604	ANTXR1	0.910019	1.0422e-14
ENSG00000163297	ANTXR2	0.27858	0.0482648
ENSG00000135046	ANXA1	0.109927	0.582689
ENSG00000109511	ANXA10	0.796363	0.485239
ENSG00000122359	ANXA11	-0.131562	0.475058
ENSG00000104537	ANXA13	3.41707	1.02126e-29
ENSG00000182718	ANXA2	-0.305994	0.0302499
ENSG00000177721	ANXA2R	0.273998	0.54954
ENSG00000138772	ANXA3	-1.02422	4.30569e-09
ENSG00000196975	ANXA4	-0.0993281	0.613706
ENSG00000164111	ANXA5	-0.396641	0.00253551
ENSG00000197043	ANXA6	-0.0530742	0.825459
ENSG00000138279	ANXA7	-0.202575	0.177415
ENSG00000265190	ANXA8	2.28921	0.065395
ENSG00000264230	ANXA8L1	3.29368	0.00833722
ENSG00000143412	ANXA9	-0.151766	0.815118
ENSG00000131480	AOC2	0.0942702	0.880691
ENSG00000131471	AOC3	1.64306	1.4897e-07
ENSG00000148120	AOPEP	0.169356	0.308502
ENSG00000138356	AOX1	0.296355	0.0352062
ENSG00000254732	AP001931.1	-1.26888	0.286167
ENSG00000255508	AP002990.1	-0.467321	0.19106
ENSG00000256591	AP003108.2	0.388375	0.644461
ENSG00000138660	AP1AR	-0.0899183	0.752824
ENSG00000100280	AP1B1	-0.175657	0.265625
ENSG00000166747	AP1G1	0.0330473	0.896867
ENSG00000213983	AP1G2	-0.128336	0.71265
ENSG00000072958	AP1M1	0.153949	0.352702
ENSG00000129354	AP1M2	-0.929206	0.000112251
ENSG00000106367	AP1S1	-0.328134	0.0103552
ENSG00000182287	AP1S2	0.0144348	0.962813
ENSG00000152056	AP1S3	-0.243049	0.597693
ENSG00000196961	AP2A1	-0.0301395	0.90994
ENSG00000183020	AP2A2	-0.175369	0.291083
ENSG00000006125	AP2B1	-0.0883652	0.676632
ENSG00000161203	AP2M1	-0.0720311	0.753734
ENSG00000042753	AP2S1	-0.0952097	0.634894
ENSG00000132842	AP3B1	0.0518994	0.81698
ENSG00000103723	AP3B2	1.04971	0.00705774
ENSG00000065000	AP3D1	-0.177807	0.279225
ENSG00000185009	AP3M1	0.16316	0.330576
ENSG00000070718	AP3M2	-0.70502	3.65014e-07
ENSG00000177879	AP3S1	0.0227672	0.93117
ENSG00000157823	AP3S2	0.260354	0.115268
ENSG00000134262	AP4B1	-0.149512	0.599556
ENSG00000081014	AP4E1	-0.00790031	0.985196
ENSG00000221838	AP4M1	-0.127979	0.578771
ENSG00000100478	AP4S1	-0.181687	0.525444
ENSG00000254470	AP5B1	0.0634623	0.805824
ENSG00000053770	AP5M1	0.015599	0.956022
ENSG00000125843	AP5S1	0.0117135	0.976031
ENSG00000242802	AP5Z1	-0.244243	0.0979872
ENSG00000120868	APAF1	-0.0341599	0.901536
ENSG00000107282	APBA1	-0.532443	0.0156537
ENSG00000034053	APBA2	-0.51057	0.0294611
ENSG00000011132	APBA3	-0.10575	0.684541
ENSG00000166313	APBB1	0.0317675	0.903481
ENSG00000077420	APBB1IP	-0.0548901	0.855215
ENSG00000163697	APBB2	0.382615	0.00178011
ENSG00000113108	APBB3	-0.00429565	0.997957
ENSG00000134982	APC	-0.140128	0.455153
ENSG00000115266	APC2	0.0941001	0.852856
ENSG00000154856	APCDD1	0.947334	0.000347633
ENSG00000198768	APCDD1L	-1.05201	1.95788e-12
ENSG00000164062	APEH	-0.0644774	0.775459
ENSG00000100823	APEX1	-0.289071	0.0294311
ENSG00000169188	APEX2	-0.0741313	0.799952
ENSG00000117362	APH1A	-0.0654959	0.765371
ENSG00000138613	APH1B	0.0395774	0.893606
ENSG00000166181	API5	0.0653344	0.766289
ENSG00000149089	APIP	-0.0674404	0.839702
ENSG00000169621	APLF	-0.127317	0.735667
ENSG00000171388	APLN	-1.76418	0.000729331
ENSG00000105290	APLP1	-0.0542927	0.890683
ENSG00000084234	APLP2	0.0461856	0.853483
ENSG00000101474	APMAP	0.304651	0.019106
ENSG00000118137	APOA1	0.330472	0.849099
ENSG00000084674	APOB	3.05645	7.29651e-13
ENSG00000179750	APOBEC3B	-2.06041	1.91705e-10
ENSG00000244509	APOBEC3C	-0.13277	0.45272
ENSG00000243811	APOBEC3D	0.022793	0.979528
ENSG00000128394	APOBEC3F	-0.135443	0.655635
ENSG00000239713	APOBEC3G	-0.185776	0.553024
ENSG00000184730	APOBR	-0.493874	0.607944
ENSG00000130208	APOC1	-0.415812	0.307005
ENSG00000189058	APOD	1.8557	6.83583e-27
ENSG00000130203	APOE	-0.344974	0.0811966
ENSG00000100342	APOL1	0.385126	0.00178725
ENSG00000128335	APOL2	0.252489	0.0663691
ENSG00000128284	APOL3	-0.0588119	0.851584
ENSG00000100336	APOL4	1.95074	0.000152749
ENSG00000221963	APOL6	0.504922	1.89133e-05
ENSG00000178878	APOLD1	-0.805323	6.28868e-07
ENSG00000204444	APOM	0.0614909	0.92897
ENSG00000184831	APOO	0.269788	0.304116
ENSG00000155008	APOOL	-0.0280615	0.922792
ENSG00000142192	APP	-0.117617	0.563309
ENSG00000062725	APPBP2	0.291119	0.0275147
ENSG00000157500	APPL1	0.144834	0.458182
ENSG00000136044	APPL2	-0.381501	0.00155144
ENSG00000198931	APRT	-0.0660996	0.773971
ENSG00000137074	APTX	-0.0885592	0.717205
ENSG00000240583	AQP1	-1.50144	4.18797e-08
ENSG00000178301	AQP11	-0.229617	0.608218
ENSG00000165272	AQP3	-0.452219	0.205252
ENSG00000103375	AQP8	3.10823	0.000445385
ENSG00000021776	AQR	-0.00871413	0.979347
ENSG00000169083	AR	0.122046	0.50386
ENSG00000078061	ARAF	0.158411	0.347314
ENSG00000186635	ARAP1	0.00338834	0.99526
ENSG00000047365	ARAP2	-0.725749	0.0138652
ENSG00000120318	ARAP3	-0.345682	0.0634908
ENSG00000198576	ARC	0.466185	0.662559
ENSG00000095139	ARCN1	0.111042	0.5754
ENSG00000109321	AREG	-0.328258	0.746639
ENSG00000119682	AREL1	0.0241261	0.926578
ENSG00000143761	ARF1	0.109801	0.586564
ENSG00000134287	ARF3	-0.154578	0.362517
ENSG00000168374	ARF4	0.148504	0.414937
ENSG00000004059	ARF5	-0.154771	0.352351
ENSG00000165527	ARF6	-0.379945	0.00204445
ENSG00000101199	ARFGAP1	0.0327464	0.896975
ENSG00000149182	ARFGAP2	-0.102766	0.608411
ENSG00000242247	ARFGAP3	0.107026	0.570724
ENSG00000066777	ARFGEF1	-0.0664975	0.767639
ENSG00000124198	ARFGEF2	-0.0132254	0.961454
ENSG00000112379	ARFGEF3	-0.128852	0.919579
ENSG00000164144	ARFIP1	0.127897	0.49929
ENSG00000132254	ARFIP2	0.0656665	0.774695
ENSG00000101246	ARFRP1	-0.182438	0.318439
ENSG00000081181	ARG2	0.361681	0.24707
ENSG00000134884	ARGLU1	-0.153271	0.377113
ENSG00000175220	ARHGAP1	-0.323149	0.0151679
ENSG00000071205	ARHGAP10	-0.456689	0.000602313
ENSG00000198826	ARHGAP11A	-0.641779	0.128698
ENSG00000288864	ARHGAP11A-SCG5	0.57784	0.532682
ENSG00000165322	ARHGAP12	0.29969	0.0447762
ENSG00000140750	ARHGAP17	-0.262595	0.0609355
ENSG00000146376	ARHGAP18	-0.603089	1.82785e-06
ENSG00000213390	ARHGAP19	-0.56344	0.00705806
ENSG00000137727	ARHGAP20	0.408403	0.00571233
ENSG00000107863	ARHGAP21	0.205041	0.173553
ENSG00000128805	ARHGAP22	-0.97603	1.06238e-13
ENSG00000275832	ARHGAP23	-0.381653	0.0024115
ENSG00000138639	ARHGAP24	0.151009	0.441778
ENSG00000163219	ARHGAP25	-1.86805	1.11905e-14
ENSG00000145819	ARHGAP26	-0.413527	0.0219632
ENSG00000159314	ARHGAP27	-1.18502	0.00217859
ENSG00000088756	ARHGAP28	1.77119	6.19233e-32
ENSG00000137962	ARHGAP29	-0.0800851	0.700661
ENSG00000031081	ARHGAP31	-0.117076	0.525859
ENSG00000134909	ARHGAP32	0.00360935	0.995785
ENSG00000004777	ARHGAP33	-0.615627	0.0486696
ENSG00000160007	ARHGAP35	-0.0913073	0.657407
ENSG00000147799	ARHGAP39	-0.235628	0.387366
ENSG00000089820	ARHGAP4	-0.317597	0.438052
ENSG00000165895	ARHGAP42	-0.334361	0.0819985
ENSG00000006740	ARHGAP44	0.299078	0.401188
ENSG00000180448	ARHGAP45	-0.405993	0.539335
ENSG00000100852	ARHGAP5	0.429402	0.000299372
ENSG00000047648	ARHGAP6	0.992485	1.20871e-07
ENSG00000123329	ARHGAP9	-0.74441	0.0728216
ENSG00000141522	ARHGDIA	-0.298368	0.0301486
ENSG00000111348	ARHGDIB	-0.924073	1.29278e-08
ENSG00000242173	ARHGDIG	0.156583	0.934001
ENSG00000076928	ARHGEF1	-0.0396217	0.870923
ENSG00000074964	ARHGEF10L	-0.149952	0.52897
ENSG00000132694	ARHGEF11	-0.058843	0.793897
ENSG00000196914	ARHGEF12	-0.195502	0.221672
ENSG00000130762	ARHGEF16	-0.411071	0.452838
ENSG00000110237	ARHGEF17	-0.140759	0.438052
ENSG00000104880	ARHGEF18	-0.00625279	0.987538
ENSG00000142632	ARHGEF19	1.29113	3.0928e-19
ENSG00000116584	ARHGEF2	-0.704937	7.60382e-10
ENSG00000240771	ARHGEF25	0.16301	0.389946
ENSG00000114790	ARHGEF26	0.938121	0.0502904
ENSG00000214944	ARHGEF28	-0.365531	0.0096271
ENSG00000163947	ARHGEF3	0.154061	0.685036
ENSG00000214694	ARHGEF33	0.294806	0.535827
ENSG00000213214	ARHGEF35	-0.441222	0.222182
ENSG00000183111	ARHGEF37	0.430692	0.157722
ENSG00000137135	ARHGEF39	0.242172	0.618581
ENSG00000165801	ARHGEF40	-0.87999	2.85278e-16
ENSG00000050327	ARHGEF5	-0.540881	0.0132765
ENSG00000129675	ARHGEF6	-0.357117	0.0456197
ENSG00000102606	ARHGEF7	0.149322	0.375692
ENSG00000131089	ARHGEF9	-0.119039	0.662175
ENSG00000117713	ARID1A	-0.307299	0.0172217
ENSG00000049618	ARID1B	-0.0671541	0.756726
ENSG00000189079	ARID2	-0.0706444	0.765536
ENSG00000116017	ARID3A	-0.063224	0.791478
ENSG00000179361	ARID3B	0.145818	0.779187
ENSG00000205143	ARID3C	-0.155461	0.837547
ENSG00000032219	ARID4A	0.024112	0.939413
ENSG00000054267	ARID4B	0.160195	0.363348
ENSG00000196843	ARID5A	-0.493222	6.85404e-05
ENSG00000150347	ARID5B	-0.167682	0.334067
ENSG00000166233	ARIH1	0.140069	0.419218
ENSG00000177479	ARIH2	-0.0306473	0.904835
ENSG00000120805	ARL1	0.0851326	0.678517
ENSG00000175414	ARL10	-0.551211	3.26189e-06
ENSG00000169379	ARL13B	0.132358	0.645917
ENSG00000152219	ARL14EP	0.0229452	0.943005
ENSG00000185305	ARL15	-0.351704	0.0172627
ENSG00000214087	ARL16	-0.118652	0.632175
ENSG00000185829	ARL17A	-0.258583	0.778053
ENSG00000228696	ARL17B	0.564004	0.489749
ENSG00000213465	ARL2	-0.109329	0.65302
ENSG00000102931	ARL2BP	0.472434	4.55919e-05
ENSG00000138175	ARL3	0.25664	0.0786147
ENSG00000122644	ARL4A	-0.0340616	0.940772
ENSG00000188042	ARL4C	-2.10923	1.35791e-79
ENSG00000175906	ARL4D	0.779134	6.38166e-10
ENSG00000162980	ARL5A	0.207977	0.226552
ENSG00000165997	ARL5B	0.272738	0.0707143
ENSG00000113966	ARL6	0.358975	0.119724
ENSG00000170540	ARL6IP1	-0.101473	0.601931
ENSG00000144746	ARL6IP5	0.432911	0.000316043
ENSG00000177917	ARL6IP6	0.164808	0.514418
ENSG00000143862	ARL8A	0.0903875	0.66723
ENSG00000134108	ARL8B	0.116891	0.525217
ENSG00000196503	ARL9	-0.29444	0.590752
ENSG00000104442	ARMC1	-0.0111375	0.970399
ENSG00000170632	ARMC10	-0.163184	0.557302
ENSG00000157343	ARMC12	1.0506	0.00799033
ENSG00000118690	ARMC2	0.424935	0.179583
ENSG00000140691	ARMC5	-0.0284295	0.935567
ENSG00000105676	ARMC6	-0.173388	0.382222
ENSG00000125449	ARMC7	-0.0670901	0.841674
ENSG00000114098	ARMC8	0.327646	0.0184101
ENSG00000135931	ARMC9	-0.426072	0.000402666
ENSG00000126947	ARMCX1	-0.0277598	0.920798
ENSG00000184867	ARMCX2	0.153324	0.356303
ENSG00000102401	ARMCX3	0.309251	0.0168429
ENSG00000196440	ARMCX4	-0.310154	0.0902036
ENSG00000125962	ARMCX5	-0.256512	0.35423
ENSG00000198960	ARMCX6	-0.283188	0.141013
ENSG00000198520	ARMH1	0.480134	0.382065
ENSG00000120029	ARMH3	-0.00402717	0.994828
ENSG00000139971	ARMH4	-0.108268	0.650482
ENSG00000146476	ARMT1	0.529812	1.2491e-05
ENSG00000143437	ARNT	0.248691	0.0742317
ENSG00000172379	ARNT2	-0.116944	0.526872
ENSG00000241685	ARPC1A	-0.0421575	0.867288
ENSG00000130429	ARPC1B	-0.0162626	0.971818
ENSG00000163466	ARPC2	-0.194886	0.229845
ENSG00000111229	ARPC3	-0.0876619	0.666568
ENSG00000241553	ARPC4	-0.179057	0.26099
ENSG00000162704	ARPC5	-0.00656087	0.986882
ENSG00000136950	ARPC5L	-0.265963	0.0739047
ENSG00000242498	ARPIN	-0.262244	0.0950889
ENSG00000128989	ARPP19	0.1205	0.515639
ENSG00000137486	ARRB1	-0.286929	0.0476837
ENSG00000141480	ARRB2	0.00680953	0.993695
ENSG00000197070	ARRDC1	0.100478	0.775459
ENSG00000105643	ARRDC2	0.342377	0.101296
ENSG00000113369	ARRDC3	0.342351	0.00803309
ENSG00000140450	ARRDC4	0.191026	0.37052
ENSG00000205784	ARRDC5	-0.188943	0.927866
ENSG00000100299	ARSA	0.358548	0.00510753
ENSG00000113273	ARSB	0.396597	0.00112559
ENSG00000006756	ARSD	0.207235	0.213516
ENSG00000141337	ARSG	0.818699	2.53967e-05
ENSG00000183876	ARSI	-0.948169	4.80144e-11
ENSG00000180801	ARSJ	-0.965543	6.88671e-19
ENSG00000164291	ARSK	0.237236	0.245014
ENSG00000157399	ARSL	0.580757	0.00475178
ENSG00000156219	ART3	0.304644	0.753872
ENSG00000167311	ART5	-1.43372	0.0027021
ENSG00000117407	ARTN	0.969398	0.143493
ENSG00000173409	ARV1	0.195458	0.428993
ENSG00000099889	ARVCF	-0.446485	0.0313659
ENSG00000214435	AS3MT	-0.12894	0.935885
ENSG00000104763	ASAH1	0.546623	1.41042e-06
ENSG00000188611	ASAH2	-0.500421	0.555868
ENSG00000204147	ASAH2B	-0.0939422	0.829721
ENSG00000153317	ASAP1	-0.214478	0.158077
ENSG00000151693	ASAP2	-0.492501	1.711e-05
ENSG00000088280	ASAP3	-0.010874	0.970023
ENSG00000065802	ASB1	-0.0701608	0.753409
ENSG00000196372	ASB13	0.0631951	0.854275
ENSG00000239388	ASB14	0.240712	0.798644
ENSG00000161664	ASB16	0.263165	0.767196
ENSG00000100628	ASB2	0.44231	0.449631
ENSG00000115239	ASB3	-0.100222	0.705554
ENSG00000164122	ASB5	0.559345	0.40466
ENSG00000148331	ASB6	-0.172303	0.352197
ENSG00000183475	ASB7	0.0570323	0.836506
ENSG00000177981	ASB8	-0.0144438	0.963094
ENSG00000102048	ASB9	-1.60709	0.161022
ENSG00000138303	ASCC1	0.07408	0.767661
ENSG00000100325	ASCC2	-0.166517	0.321617
ENSG00000112249	ASCC3	-0.0531246	0.814413
ENSG00000183734	ASCL2	0.262577	0.788676
ENSG00000232237	ASCL5	-0.479596	0.750492
ENSG00000111875	ASF1A	-0.217087	0.293157
ENSG00000105011	ASF1B	-1.71917	7.41199e-13
ENSG00000141505	ASGR1	-1.26629	0.000385607
ENSG00000116539	ASH1L	0.0900884	0.652831
ENSG00000129691	ASH2L	-0.109823	0.580064
ENSG00000110881	ASIC1	0.238827	0.28928
ENSG00000213199	ASIC3	0.540758	0.211442
ENSG00000072182	ASIC4	-0.529467	0.700208
ENSG00000101440	ASIP	1.52746	0.0282329
ENSG00000126522	ASL	0.0660209	0.841583
ENSG00000070669	ASNS	-0.340111	0.379962
ENSG00000138381	ASNSD1	0.264562	0.154702
ENSG00000108381	ASPA	0.1215	0.880691
ENSG00000198363	ASPH	-0.0868405	0.689761
ENSG00000174939	ASPHD1	0.515885	0.00831878
ENSG00000128203	ASPHD2	-0.254229	0.510039
ENSG00000066279	ASPM	-0.247952	0.408185
ENSG00000106819	ASPN	-0.468393	0.000153545
ENSG00000169696	ASPSCR1	-0.0929683	0.724866
ENSG00000162174	ASRGL1	0.0179776	0.986828
ENSG00000130707	ASS1	0.574216	9.08977e-07
ENSG00000034533	ASTE1	-0.322165	0.219247
ENSG00000188886	ASTL	0.314853	0.883968
ENSG00000152092	ASTN1	-0.297043	0.884632
ENSG00000148219	ASTN2	-0.957987	2.69584e-08
ENSG00000171456	ASXL1	-0.0926596	0.64056
ENSG00000143970	ASXL2	-0.0340921	0.895853
ENSG00000141431	ASXL3	-1.63645	6.25073e-05
ENSG00000154438	ASZ1	1.37295	0.182772
ENSG00000138138	ATAD1	0.16865	0.303876
ENSG00000156802	ATAD2	-0.474235	0.00524111
ENSG00000119778	ATAD2B	-0.164004	0.535827
ENSG00000197785	ATAD3A	-0.0875325	0.708331
ENSG00000160072	ATAD3B	-0.290794	0.186471
ENSG00000215915	ATAD3C	-0.128773	0.848171
ENSG00000176208	ATAD5	-1.01716	0.000796579
ENSG00000137343	ATAT1	-0.276418	0.366088
ENSG00000167654	ATCAY	-1.11066	0.019693
ENSG00000107669	ATE1	-0.0503741	0.847175
ENSG00000123268	ATF1	0.0266943	0.935612
ENSG00000115966	ATF2	-0.0340899	0.897202
ENSG00000162772	ATF3	-1.49049	2.58844e-29
ENSG00000128272	ATF4	-0.139637	0.452838
ENSG00000169136	ATF5	-0.712242	6.92654e-10
ENSG00000118217	ATF6	0.0372452	0.878127
ENSG00000213676	ATF6B	-0.0436661	0.875869
ENSG00000170653	ATF7	-0.125306	0.509659
ENSG00000171681	ATF7IP	0.0392732	0.871761
ENSG00000166669	ATF7IP2	-0.30798	0.391949
ENSG00000152348	ATG10	0.115309	0.763208
ENSG00000123395	ATG101	-0.0536225	0.818775
ENSG00000145782	ATG12	0.14522	0.411923
ENSG00000175224	ATG13	0.00854884	0.979347
ENSG00000126775	ATG14	-0.278336	0.0611004
ENSG00000085978	ATG16L1	0.0242283	0.934001
ENSG00000168010	ATG16L2	-0.27648	0.416557
ENSG00000110046	ATG2A	-0.0696021	0.773971
ENSG00000066739	ATG2B	0.0685266	0.76149
ENSG00000144848	ATG3	-0.182456	0.256233
ENSG00000101844	ATG4A	-0.0858011	0.797659
ENSG00000168397	ATG4B	-0.0795496	0.718529
ENSG00000125703	ATG4C	0.154852	0.620536
ENSG00000130734	ATG4D	-0.0244146	0.947483
ENSG00000057663	ATG5	0.151961	0.437938
ENSG00000197548	ATG7	-0.271721	0.0991914
ENSG00000198925	ATG9A	0.0898183	0.671779
ENSG00000181652	ATG9B	-0.560033	0.777605
ENSG00000138363	ATIC	-0.13659	0.434949
ENSG00000198513	ATL1	0.514818	0.00363517
ENSG00000119787	ATL2	0.591239	1.34462e-05
ENSG00000184743	ATL3	0.204001	0.183655
ENSG00000149311	ATM	0.039891	0.868572
ENSG00000166454	ATMIN	-0.0265246	0.919104
ENSG00000111676	ATN1	-0.000703941	0.999178
ENSG00000179774	ATOH7	-0.636133	0.587063
ENSG00000168874	ATOH8	1.21713	1.54511e-23
ENSG00000047346	ATOSA	0.0544338	0.847246
ENSG00000005238	ATOSB	-0.0508887	0.828607
ENSG00000177556	ATOX1	-0.149429	0.423684
ENSG00000206190	ATP10A	-0.853551	2.69286e-08
ENSG00000145246	ATP10D	-0.498486	1.97202e-05
ENSG00000068650	ATP11A	0.0158531	0.960652
ENSG00000058063	ATP11B	0.143131	0.411514
ENSG00000101974	ATP11C	-0.136359	0.454877
ENSG00000105726	ATP13A1	0.0588463	0.79859
ENSG00000159363	ATP13A2	0.021213	0.938655
ENSG00000133657	ATP13A3	-0.190207	0.214043
ENSG00000163399	ATP1A1	-0.102041	0.613248
ENSG00000018625	ATP1A2	1.99033	6.40691e-09
ENSG00000143153	ATP1B1	-0.034621	0.914623
ENSG00000129244	ATP1B2	0.961141	0.183425
ENSG00000069849	ATP1B3	0.174283	0.286167
ENSG00000166896	ATP23	-0.0554606	0.932664
ENSG00000196296	ATP2A1	0.374495	0.501471
ENSG00000174437	ATP2A2	0.125364	0.521011
ENSG00000074370	ATP2A3	0.477416	0.179445
ENSG00000070961	ATP2B1	-0.868373	1.99851e-15
ENSG00000067842	ATP2B3	0.572045	0.405139
ENSG00000058668	ATP2B4	-0.0244123	0.929632
ENSG00000017260	ATP2C1	-0.328779	0.011379
ENSG00000152234	ATP5F1A	-0.0744297	0.739787
ENSG00000110955	ATP5F1B	-0.0176669	0.948326
ENSG00000165629	ATP5F1C	-0.0880662	0.664095
ENSG00000099624	ATP5F1D	-0.112588	0.559514
ENSG00000124172	ATP5F1E	0.0024196	0.997917
ENSG00000130770	ATP5IF1	0.128623	0.500461
ENSG00000159199	ATP5MC1	-0.0636222	0.814881
ENSG00000135390	ATP5MC2	-0.232337	0.100717
ENSG00000154518	ATP5MC3	-0.0611867	0.782171
ENSG00000169020	ATP5ME	-0.104006	0.609872
ENSG00000241468	ATP5MF	-0.0247881	0.929251
ENSG00000167283	ATP5MG	0.0595149	0.806568
ENSG00000156411	ATP5MJ	-0.0385736	0.881219
ENSG00000173915	ATP5MK	-0.0196317	0.942322
ENSG00000116459	ATP5PB	-0.107047	0.572693
ENSG00000167863	ATP5PD	0.00970969	0.974102
ENSG00000154723	ATP5PF	-0.0422568	0.860387
ENSG00000241837	ATP5PO	-0.11853	0.583989
ENSG00000071553	ATP6AP1	0.23178	0.109615
ENSG00000182220	ATP6AP2	0.329763	0.0111176
ENSG00000033627	ATP6V0A1	-0.0953358	0.64874
ENSG00000185344	ATP6V0A2	0.0275901	0.923338
ENSG00000117410	ATP6V0B	0.058846	0.797539
ENSG00000185883	ATP6V0C	-0.0944843	0.93917
ENSG00000159720	ATP6V0D1	-0.156555	0.34262
ENSG00000147614	ATP6V0D2	-0.878695	0.0531929
ENSG00000113732	ATP6V0E1	0.286316	0.032516
ENSG00000171130	ATP6V0E2	0.30827	0.139929
ENSG00000114573	ATP6V1A	-0.189154	0.215525
ENSG00000116039	ATP6V1B1	0.142336	0.808377
ENSG00000147416	ATP6V1B2	-0.31408	0.0147392
ENSG00000155097	ATP6V1C1	-0.0142111	0.959151
ENSG00000143882	ATP6V1C2	0.644935	0.116236
ENSG00000100554	ATP6V1D	-0.069999	0.74794
ENSG00000131100	ATP6V1E1	-0.0110996	0.968765
ENSG00000250565	ATP6V1E2	0.289807	0.410176
ENSG00000128524	ATP6V1F	-0.126099	0.491542
ENSG00000272899	ATP6V1FNB	0.0266497	0.965823
ENSG00000136888	ATP6V1G1	0.0984162	0.612876
ENSG00000047249	ATP6V1H	-0.111317	0.564425
ENSG00000165240	ATP7A	0.030632	0.921107
ENSG00000123191	ATP7B	-0.0520568	0.882375
ENSG00000124406	ATP8A1	1.34374	8.3043e-05
ENSG00000132932	ATP8A2	1.08576	0.0391921
ENSG00000081923	ATP8B1	-2.30598	9.19081e-92
ENSG00000143515	ATP8B2	0.203939	0.18932
ENSG00000130270	ATP8B3	0.278714	0.377722
ENSG00000104043	ATP8B4	1.61388	2.45933e-45
ENSG00000054793	ATP9A	-0.317847	0.0124159
ENSG00000166377	ATP9B	-0.073398	0.789891
ENSG00000123472	ATPAF1	0.140869	0.462169
ENSG00000171953	ATPAF2	-0.0628686	0.86743
ENSG00000150756	ATPSCKMT	0.0980815	0.755916
ENSG00000175054	ATR	0.0638583	0.813809
ENSG00000138085	ATRAID	0.347126	0.00530215
ENSG00000164053	ATRIP	-0.0362869	0.93247
ENSG00000088812	ATRN	0.167447	0.307139
ENSG00000107518	ATRNL1	-0.249562	0.465605
ENSG00000085224	ATRX	0.0245273	0.925142
ENSG00000124788	ATXN1	0.338389	0.0072284
ENSG00000130638	ATXN10	-0.0866612	0.672772
ENSG00000224470	ATXN1L	-0.0515652	0.821997
ENSG00000204842	ATXN2	-0.046651	0.83922
ENSG00000168488	ATXN2L	-0.335047	0.00798157
ENSG00000066427	ATXN3	-0.103371	0.690554
ENSG00000163635	ATXN7	0.176071	0.35985
ENSG00000146776	ATXN7L1	-0.162195	0.562758
ENSG00000162650	ATXN7L2	-0.212381	0.494621
ENSG00000087152	ATXN7L3	-0.0925301	0.642002
ENSG00000253719	ATXN7L3B	-0.039193	0.870092
ENSG00000148090	AUH	0.0435822	0.914765
ENSG00000127423	AUNIP	-1.14207	0.000419097
ENSG00000115307	AUP1	0.123592	0.495692
ENSG00000087586	AURKA	-0.89997	3.98791e-06
ENSG00000175756	AURKAIP1	-0.0120139	0.96681
ENSG00000178999	AURKB	-1.69274	4.48735e-10
ENSG00000105146	AURKC	-0.00621947	0.998329
ENSG00000158321	AUTS2	-0.148373	0.464164
ENSG00000169857	AVEN	-0.221772	0.132323
ENSG00000135407	AVIL	0.786292	0.00415033
ENSG00000105778	AVL9	-0.1004	0.623631
ENSG00000119986	AVPI1	0.832206	2.73139e-09
ENSG00000166148	AVPR1A	4.41516	3.00504e-11
ENSG00000162779	AXDND1	0.998925	0.473296
ENSG00000103126	AXIN1	-0.174854	0.337111
ENSG00000168646	AXIN2	1.44594	7.33706e-09
ENSG00000167601	AXL	-0.417756	0.000882309
ENSG00000163512	AZI2	0.218291	0.13964
ENSG00000155096	AZIN1	-0.260345	0.0603468
ENSG00000142920	AZIN2	0.282826	0.43151
ENSG00000166710	B2M	0.115295	0.562867
ENSG00000169255	B3GALNT1	-0.487795	0.0066068
ENSG00000162885	B3GALNT2	0.514534	6.51731e-06
ENSG00000172318	B3GALT1	-1.95839	2.22416e-12
ENSG00000162630	B3GALT2	0.166864	0.662247
ENSG00000183778	B3GALT5	1.80754	3.74214e-06
ENSG00000176022	B3GALT6	-0.0681965	0.765371
ENSG00000214654	B3GALT9	-0.083643	0.85717
ENSG00000112309	B3GAT2	0.324749	0.733639
ENSG00000149541	B3GAT3	-0.0779257	0.751606
ENSG00000187676	B3GLCT	-0.0799689	0.770113
ENSG00000170340	B3GNT2	0.221153	0.26047
ENSG00000176383	B3GNT4	0.0716634	0.921175
ENSG00000176597	B3GNT5	-0.148529	0.630466
ENSG00000156966	B3GNT7	0.101072	0.893253
ENSG00000177191	B3GNT8	0.342162	0.424361
ENSG00000237172	B3GNT9	-0.00662788	0.985909
ENSG00000175711	B3GNTL1	-0.611545	0.0323772
ENSG00000135454	B4GALNT1	-0.235681	0.294238
ENSG00000182272	B4GALNT4	0.188347	0.551134
ENSG00000086062	B4GALT1	0.727784	1.84899e-10
ENSG00000117411	B4GALT2	0.0858654	0.673081
ENSG00000158850	B4GALT3	0.0286553	0.92213
ENSG00000121578	B4GALT4	0.308043	0.0190193
ENSG00000158470	B4GALT5	0.0781985	0.708096
ENSG00000118276	B4GALT6	-0.0436949	0.928266
ENSG00000027847	B4GALT7	0.0293715	0.922596
ENSG00000174684	B4GAT1	0.716356	1.24306e-09
ENSG00000108641	B9D1	0.360722	0.0444737
ENSG00000123810	B9D2	0.169304	0.657995
ENSG00000164929	BAALC	-1.95757	9.37939e-05
ENSG00000136881	BAAT	-0.751539	0.684697
ENSG00000105393	BABAM1	-0.151971	0.513484
ENSG00000158019	BABAM2	-0.0472534	0.85998
ENSG00000186318	BACE1	0.0054365	0.990209
ENSG00000182240	BACE2	-0.154327	0.376339
ENSG00000156273	BACH1	-0.468363	9.55788e-05
ENSG00000112182	BACH2	-0.937617	0.00121063
ENSG00000002330	BAD	0.0419589	0.867456
ENSG00000107262	BAG1	-0.133085	0.525859
ENSG00000112208	BAG2	0.212112	0.148366
ENSG00000151929	BAG3	0.0429694	0.855285
ENSG00000156735	BAG4	0.121463	0.58272
ENSG00000166170	BAG5	0.0786645	0.71795
ENSG00000204463	BAG6	-0.270303	0.0430786
ENSG00000266074	BAHCC1	-0.22899	0.194325
ENSG00000140320	BAHD1	-0.216886	0.191569
ENSG00000175866	BAIAP2	-0.28013	0.134246
ENSG00000006453	BAIAP2L1	-0.762954	1.33677e-08
ENSG00000128298	BAIAP2L2	-0.651107	0.00808817
ENSG00000007516	BAIAP3	0.186366	0.781119
ENSG00000030110	BAK1	-0.273583	0.132742
ENSG00000095739	BAMBI	0.201324	0.304245
ENSG00000175334	BANF1	-0.170756	0.320871
ENSG00000153064	BANK1	-0.627665	0.104522
ENSG00000172530	BANP	-0.112477	0.681708
ENSG00000163930	BAP1	-0.148491	0.382928
ENSG00000138376	BARD1	-0.0371471	0.932566
ENSG00000131668	BARX1	1.78013	0.0227129
ENSG00000176788	BASP1	0.906726	6.20775e-16
ENSG00000168062	BATF2	-0.630353	0.0517916
ENSG00000123685	BATF3	-0.902988	0.0161497
ENSG00000087088	BAX	-0.50248	1.11337e-05
ENSG00000198604	BAZ1A	-0.142697	0.434564
ENSG00000009954	BAZ1B	-0.110414	0.564004
ENSG00000076108	BAZ2A	-0.118773	0.517315
ENSG00000123636	BAZ2B	0.097648	0.672737
ENSG00000105327	BBC3	-1.17118	1.3553e-19
ENSG00000214413	BBIP1	0.162267	0.509578
ENSG00000171159	BBLN	-0.0221509	0.940112
ENSG00000119636	BBOF1	0.823123	2.48905e-06
ENSG00000179941	BBS10	0.0286816	0.936224
ENSG00000181004	BBS12	0.198315	0.519382
ENSG00000125124	BBS2	-0.0499242	0.870092
ENSG00000140463	BBS4	-0.0513701	0.866051
ENSG00000163093	BBS5	0.117103	0.749809
ENSG00000138686	BBS7	0.192491	0.352541
ENSG00000122507	BBS9	-0.0213207	0.946955
ENSG00000114439	BBX	0.203318	0.171391
ENSG00000187244	BCAM	0.188852	0.241023
ENSG00000132692	BCAN	-1.90822	0.00943021
ENSG00000075790	BCAP29	-0.713361	0.516156
ENSG00000185825	BCAP31	0.229211	0.113709
ENSG00000050820	BCAR1	-0.554212	1.42147e-06
ENSG00000137936	BCAR3	-0.544034	4.9635e-06
ENSG00000116752	BCAS2	-0.044562	0.880691
ENSG00000141376	BCAS3	-0.105948	0.659848
ENSG00000124243	BCAS4	-0.50838	0.00519438
ENSG00000060982	BCAT1	0.138954	0.44535
ENSG00000105552	BCAT2	0.0995087	0.683424
ENSG00000107949	BCCIP	-0.0721766	0.771348
ENSG00000186666	BCDIN3D	0.177419	0.56812
ENSG00000114200	BCHE	0.383905	0.599553
ENSG00000248098	BCKDHA	-0.264534	0.837603
ENSG00000083123	BCKDHB	0.150465	0.601129
ENSG00000103507	BCKDK	-0.130668	0.48869
ENSG00000142867	BCL10	-0.201673	0.277305
ENSG00000119866	BCL11A	-0.173148	0.743013
ENSG00000171791	BCL2	-0.610902	0.052169
ENSG00000171552	BCL2L1	-0.292051	0.0260914
ENSG00000137875	BCL2L10	0.539182	0.153223
ENSG00000153094	BCL2L11	0.708228	0.00014811
ENSG00000126453	BCL2L12	-0.328227	0.194793
ENSG00000099968	BCL2L13	-0.0865254	0.67306
ENSG00000188761	BCL2L15	-0.439007	0.72314
ENSG00000129473	BCL2L2	0.243485	0.102393
ENSG00000258643	BCL2L2-PABPN1	0.316013	0.672781
ENSG00000069399	BCL3	-0.265653	0.100543
ENSG00000113916	BCL6	0.128326	0.48869
ENSG00000161940	BCL6B	-0.58891	0.596168
ENSG00000110987	BCL7A	-0.367983	0.084503
ENSG00000106635	BCL7B	0.0148284	0.958102
ENSG00000099385	BCL7C	-0.467665	0.000153656
ENSG00000116128	BCL9	-0.237027	0.185161
ENSG00000186174	BCL9L	-0.048321	0.836995
ENSG00000029363	BCLAF1	0.00182791	0.998355
ENSG00000173681	BCLAF3	0.0125154	0.979321
ENSG00000135697	BCO1	1.78836	0.0944171
ENSG00000197580	BCO2	1.24881	0.000227732
ENSG00000183337	BCOR	-0.115681	0.588565
ENSG00000085185	BCORL1	0.0959557	0.681884
ENSG00000186716	BCR	-0.035574	0.891568
ENSG00000074582	BCS1L	-0.173276	0.512398
ENSG00000161267	BDH1	0.408134	0.329366
ENSG00000164039	BDH2	0.0320941	0.910866
ENSG00000100739	BDKRB1	0.298745	0.102514
ENSG00000168398	BDKRB2	0.437607	0.000286891
ENSG00000176697	BDNF	-0.506502	3.67822e-05
ENSG00000145734	BDP1	-0.0201669	0.962002
ENSG00000166546	BEAN1	0.359613	0.294072
ENSG00000126581	BECN1	0.0646018	0.767639
ENSG00000183092	BEGAIN	-1.96783	0.0117412
ENSG00000178409	BEND3	-0.152861	0.634325
ENSG00000162373	BEND5	-0.305511	0.858588
ENSG00000151917	BEND6	-0.0790587	0.780942
ENSG00000165626	BEND7	-0.34691	0.292354
ENSG00000167995	BEST1	-0.160544	0.402187
ENSG00000127325	BEST3	-1.42111	0.25508
ENSG00000142959	BEST4	0.0597287	0.951529
ENSG00000105829	BET1	0.338103	0.022133
ENSG00000177951	BET1L	0.187057	0.226327
ENSG00000133169	BEX1	-0.274988	0.290886
ENSG00000133134	BEX2	-1.74437	6.96193e-08
ENSG00000166681	BEX3	0.070088	0.750371
ENSG00000102409	BEX4	-0.236623	0.205887
ENSG00000103429	BFAR	-0.0979612	0.747217
ENSG00000125864	BFSP1	-0.0021962	0.998846
ENSG00000182492	BGN	-0.812915	5.11448e-13
ENSG00000180535	BHLHA15	-0.488346	0.419783
ENSG00000134107	BHLHE40	-0.653748	2.52579e-08
ENSG00000123095	BHLHE41	-1.6998	9.03908e-33
ENSG00000145692	BHMT	0.405371	0.601876
ENSG00000132840	BHMT2	0.16933	0.363871
ENSG00000122870	BICC1	0.032324	0.902239
ENSG00000151746	BICD1	-0.252113	0.12745
ENSG00000185963	BICD2	-0.0114418	0.967279
ENSG00000135127	BICDL1	-0.446273	0.470944
ENSG00000162069	BICDL2	0.802695	0.606809
ENSG00000063169	BICRA	0.120717	0.601592
ENSG00000112624	BICRAL	0.0864636	0.7345
ENSG00000015475	BID	-0.183901	0.330114
ENSG00000136717	BIN1	0.0433474	0.853617
ENSG00000147439	BIN3	-0.0610329	0.837204
ENSG00000110330	BIRC2	0.170739	0.304717
ENSG00000023445	BIRC3	-0.394169	0.299665
ENSG00000089685	BIRC5	-1.7181	1.3295e-19
ENSG00000115760	BIRC6	-0.0592861	0.793953
ENSG00000134897	BIVM	-0.000822594	0.99919
ENSG00000166619	BLCAP	0.132846	0.459579
ENSG00000259571	BLID	-1.07762	0.47217
ENSG00000136573	BLK	2.94984	0.0344751
ENSG00000197299	BLM	-1.34503	4.32386e-05
ENSG00000108578	BLMH	-0.103437	0.615679
ENSG00000135441	BLOC1S1	-0.0466945	0.904053
ENSG00000196072	BLOC1S2	-0.327929	0.0262558
ENSG00000189114	BLOC1S3	-0.161077	0.519382
ENSG00000186222	BLOC1S4	-0.00427158	0.995785
ENSG00000188428	BLOC1S5	-0.0574214	0.866785
ENSG00000104164	BLOC1S6	0.124473	0.495098
ENSG00000138688	BLTP1	0.0654994	0.764946
ENSG00000007202	BLTP2	-0.0824793	0.700693
ENSG00000065060	BLTP3A	-0.148779	0.395187
ENSG00000111647	BLTP3B	0.052915	0.837506
ENSG00000106605	BLVRA	-0.185334	0.333679
ENSG00000090013	BLVRB	-0.300426	0.0720335
ENSG00000117475	BLZF1	0.136769	0.548112
ENSG00000133794	BMAL1	0.362253	0.0532379
ENSG00000029153	BMAL2	-0.510555	0.000904763
ENSG00000166780	BMERB1	-0.465724	0.0129763
ENSG00000104081	BMF	-0.837825	2.08527e-05
ENSG00000168283	BMI1	0.161427	0.468635
ENSG00000168487	BMP1	0.557626	1.98962e-06
ENSG00000125845	BMP2	1.36055	3.11767e-20
ENSG00000138756	BMP2K	-0.711514	4.57107e-10
ENSG00000152785	BMP3	-0.603419	0.635857
ENSG00000125378	BMP4	0.0798583	0.896158
ENSG00000153162	BMP6	2.37444	1.48725e-52
ENSG00000183682	BMP8A	1.29318	6.19053e-06
ENSG00000116985	BMP8B	1.51885	0.115451
ENSG00000164619	BMPER	-0.054601	0.895211
ENSG00000107779	BMPR1A	-0.0237441	0.931019
ENSG00000138696	BMPR1B	0.89353	2.12617e-07
ENSG00000204217	BMPR2	-0.0541236	0.814413
ENSG00000165733	BMS1	-0.169977	0.313125
ENSG00000164603	BMT2	0.32043	0.0665904
ENSG00000169594	BNC1	-0.455541	0.00916759
ENSG00000173068	BNC2	0.323537	0.0107572
ENSG00000113734	BNIP1	-0.0601875	0.870451
ENSG00000140299	BNIP2	0.119695	0.51036
ENSG00000176171	BNIP3	0.286646	0.0408448
ENSG00000104765	BNIP3L	0.310644	0.019419
ENSG00000163141	BNIPL	-0.318527	0.757113
ENSG00000144857	BOC	0.430823	0.000609948
ENSG00000145919	BOD1	-0.226888	0.125114
ENSG00000038219	BOD1L1	0.00836849	0.979372
ENSG00000176720	BOK	-0.418114	0.00044214
ENSG00000178096	BOLA1	0.0853169	0.830512
ENSG00000163170	BOLA3	-0.0825553	0.806138
ENSG00000261236	BOP1	-0.477131	0.000151924
ENSG00000136122	BORA	-0.0465732	0.928627
ENSG00000165714	BORCS5	-0.118598	0.661531
ENSG00000196544	BORCS6	-0.110163	0.722436
ENSG00000166275	BORCS7	0.467233	0.00305336
ENSG00000254901	BORCS8	-0.152891	0.645423
ENSG00000172331	BPGM	0.342712	0.00826897
ENSG00000137274	BPHL	-0.344563	0.125375
ENSG00000101425	BPI	-0.383676	0.770113
ENSG00000162813	BPNT1	-0.121948	0.585682
ENSG00000104331	BPNT2	0.435757	0.000291631
ENSG00000171634	BPTF	-0.0205293	0.937083
ENSG00000157764	BRAF	-0.02405	0.931805
ENSG00000089234	BRAP	0.050255	0.844902
ENSG00000106009	BRAT1	-0.172562	0.365303
ENSG00000012048	BRCA1	-0.637592	0.00734154
ENSG00000139618	BRCA2	-0.236669	0.539904
ENSG00000185515	BRCC3	0.0046624	0.994697
ENSG00000100425	BRD1	-0.0361495	0.890683
ENSG00000204256	BRD2	-0.0452859	0.853769
ENSG00000169925	BRD3	-0.0448876	0.8491
ENSG00000235106	BRD3OS	0.11043	0.582217
ENSG00000141867	BRD4	-0.168995	0.299196
ENSG00000166164	BRD7	-0.135089	0.472164
ENSG00000112983	BRD8	0.0886322	0.682653
ENSG00000028310	BRD9	-0.162834	0.37784
ENSG00000185024	BRF1	-0.0543924	0.832613
ENSG00000104221	BRF2	-0.00271604	0.998329
ENSG00000164713	BRI3	-0.385608	0.00145134
ENSG00000184992	BRI3BP	-0.0374465	0.913048
ENSG00000182685	BRICD5	0.0204514	0.980527
ENSG00000078725	BRINP1	0.843002	0.0492907
ENSG00000136492	BRIP1	-0.898328	9.77919e-06
ENSG00000113460	BRIX1	-0.00759083	0.987098
ENSG00000254999	BRK1	-0.0143982	0.957968
ENSG00000132016	BRME1	-0.330854	0.618564
ENSG00000174744	BRMS1	-0.0879672	0.705146
ENSG00000100916	BRMS1L	0.181987	0.470638
ENSG00000162819	BROX	-0.120632	0.522411
ENSG00000156983	BRPF1	-0.147789	0.495931
ENSG00000096070	BRPF3	0.14018	0.424361
ENSG00000160469	BRSK1	-0.118219	0.700254
ENSG00000174672	BRSK2	0.581513	0.175473
ENSG00000185658	BRWD1	0.0278329	0.919104
ENSG00000165288	BRWD3	-0.194055	0.368239
ENSG00000168000	BSCL2	0.227122	0.583644
ENSG00000160058	BSDC1	-0.119912	0.510381
ENSG00000172270	BSG	0.311447	0.0243108
ENSG00000164061	BSN	0.297641	0.602837
ENSG00000109743	BST1	-0.0802743	0.74724
ENSG00000130303	BST2	0.365076	0.0677109
ENSG00000095564	BTAF1	0.2466	0.0915409
ENSG00000064726	BTBD1	0.0614094	0.783175
ENSG00000148925	BTBD10	-0.308842	0.02676
ENSG00000222009	BTBD19	0.0941948	0.717205
ENSG00000133243	BTBD2	-0.0294367	0.910253
ENSG00000132640	BTBD3	0.156315	0.362517
ENSG00000184887	BTBD6	-0.0844615	0.690643
ENSG00000011114	BTBD7	-0.128085	0.730997
ENSG00000189195	BTBD8	-0.154441	0.724773
ENSG00000183826	BTBD9	-0.160036	0.440187
ENSG00000174808	BTC	5.18981	0.00117872
ENSG00000169814	BTD	0.15161	0.391598
ENSG00000145741	BTF3	-0.0689307	0.761412
ENSG00000134717	BTF3L4	-0.0945898	0.645917
ENSG00000133639	BTG1	0.713596	8.36247e-11
ENSG00000159388	BTG2	0.0648704	0.805435
ENSG00000154640	BTG3	-0.119153	0.591902
ENSG00000186265	BTLA	1.70889	0.00147892
ENSG00000112763	BTN2A1	0.133637	0.472592
ENSG00000124508	BTN2A2	-0.290497	0.12817
ENSG00000026950	BTN3A1	0.10548	0.60037
ENSG00000186470	BTN3A2	0.308975	0.0189739
ENSG00000111801	BTN3A3	0.0733248	0.756034
ENSG00000166167	BTRC	0.0397531	0.888354
ENSG00000169679	BUB1	-1.37009	1.57113e-09
ENSG00000156970	BUB1B	-1.88692	9.50155e-15
ENSG00000154473	BUB3	-0.230752	0.111155
ENSG00000137656	BUD13	-0.0915504	0.767196
ENSG00000071462	BUD23	0.11205	0.580064
ENSG00000106245	BUD31	-0.195361	0.208968
ENSG00000112276	BVES	0.240348	0.145841
ENSG00000112578	BYSL	-0.34021	0.041262
ENSG00000082153	BZW1	0.0118079	0.965823
ENSG00000136261	BZW2	-0.317928	0.0194929
ENSG00000214688	C10orf105	0.759503	0.0302684
ENSG00000237489	C10orf143	0.163436	0.734793
ENSG00000179133	C10orf67	-0.028658	0.98748
ENSG00000119965	C10orf88	-0.278426	0.219134
ENSG00000154493	C10orf90	0.99526	0.346857
ENSG00000120055	C10orf95	-0.877987	0.590088
ENSG00000171067	C11orf24	0.168166	0.297575
ENSG00000149300	C11orf52	-0.0121985	0.992763
ENSG00000182919	C11orf54	0.344733	0.108876
ENSG00000110696	C11orf58	0.08448	0.682143
ENSG00000166323	C11orf65	-0.51729	0.450605
ENSG00000175573	C11orf68	-0.278329	0.0439635
ENSG00000180425	C11orf71	-0.142985	0.780942
ENSG00000173715	C11orf80	-0.0861096	0.825442
ENSG00000173237	C11orf86	2.83154	0.00746525
ENSG00000185742	C11orf87	2.61088	4.20206e-24
ENSG00000205177	C11orf91	-0.489886	0.754976
ENSG00000187479	C11orf96	0.623376	2.39384e-08
ENSG00000133641	C12orf29	0.0752445	0.800098
ENSG00000047621	C12orf4	-0.112702	0.646351
ENSG00000157895	C12orf43	-0.194794	0.356473
ENSG00000111678	C12orf57	0.0666996	0.758885
ENSG00000182993	C12orf60	0.0550396	0.943081
ENSG00000235162	C12orf75	-0.618355	7.62763e-08
ENSG00000174456	C12orf76	0.256117	0.474042
ENSG00000283199	C13orf46	-0.300192	0.551183
ENSG00000179933	C14orf119	0.0474777	0.838078
ENSG00000227051	C14orf132	-0.153229	0.364963
ENSG00000179476	C14orf28	-0.0410683	0.912184
ENSG00000100802	C14orf93	-0.11651	0.752895
ENSG00000167173	C15orf39	0.532085	1.04935e-05
ENSG00000169609	C15orf40	0.0585082	0.857552
ENSG00000166920	C15orf48	0.0741078	0.953936
ENSG00000189227	C15orf61	0.20459	0.472456
ENSG00000188277	C15orf62	1.42223	0.018042
ENSG00000166455	C16orf46	-0.340986	0.449595
ENSG00000154102	C16orf74	-0.675191	0.00774535
ENSG00000159761	C16orf86	0.502496	0.12146
ENSG00000155330	C16orf87	-0.000286746	0.999231
ENSG00000260456	C16orf95	0.125023	0.87316
ENSG00000205832	C16orf96	0.911897	0.569216
ENSG00000256806	C17orf100	0.230287	0.564004
ENSG00000205710	C17orf107	-0.49632	0.0160828
ENSG00000267221	C17orf113	-0.838711	0.192896
ENSG00000262165	C17orf114	0.0895558	0.919261
ENSG00000258315	C17orf49	-0.79249	0.156647
ENSG00000186665	C17orf58	0.600811	0.000270349
ENSG00000214226	C17orf67	-0.343458	0.276816
ENSG00000108666	C17orf75	-0.155401	0.541826
ENSG00000141219	C17orf80	-0.111503	0.643757
ENSG00000187624	C17orf97	-0.288647	0.302554
ENSG00000141428	C18orf21	-0.230516	0.369929
ENSG00000152242	C18orf25	-0.145623	0.467142
ENSG00000177576	C18orf32	0.183463	0.597868
ENSG00000166845	C18orf54	-0.43073	0.104835
ENSG00000131943	C19orf12	0.000758644	0.999178
ENSG00000177025	C19orf18	0.0186937	0.987139
ENSG00000119559	C19orf25	0.070963	0.789854
ENSG00000214212	C19orf38	-0.217846	0.770819
ENSG00000105072	C19orf44	0.00145365	0.999178
ENSG00000160392	C19orf47	-0.151395	0.584233
ENSG00000104979	C19orf53	-0.095333	0.640682
ENSG00000221916	C19orf73	-0.507864	0.376686
ENSG00000235034	C19orf81	0.137309	0.857096
ENSG00000283567	C19orf85	-0.655886	0.737019
ENSG00000197223	C1D	0.101746	0.746278
ENSG00000106392	C1GALT1	0.215559	0.325474
ENSG00000171155	C1GALT1C1	1.25639	2.6331e-28
ENSG00000223658	C1GALT1C1L	0.281752	0.590156
ENSG00000116922	C1orf109	-0.106426	0.691035
ENSG00000000460	C1orf112	-0.445308	0.0875829
ENSG00000162817	C1orf115	-0.0283487	0.93978
ENSG00000182795	C1orf116	1.21998	0.369506
ENSG00000197982	C1orf122	-0.0447696	0.854283
ENSG00000143633	C1orf131	-0.0854148	0.810022
ENSG00000131591	C1orf159	-0.19305	0.509578
ENSG00000143110	C1orf162	0.26063	0.813204
ENSG00000215910	C1orf167	1.31001	0.00767317
ENSG00000198912	C1orf174	0.137407	0.579797
ENSG00000119280	C1orf198	-1.08044	3.3069e-22
ENSG00000116667	C1orf21	2.12973	1.57845e-80
ENSG00000142686	C1orf216	0.105421	0.625319
ENSG00000239887	C1orf226	1.03235	0.00200029
ENSG00000143793	C1orf35	-0.238529	0.329051
ENSG00000143612	C1orf43	0.00721668	0.984112
ENSG00000164008	C1orf50	-0.242182	0.416647
ENSG00000162642	C1orf52	0.0851852	0.747376
ENSG00000203724	C1orf53	0.370781	0.241023
ENSG00000118292	C1orf54	-0.397362	0.0988883
ENSG00000143443	C1orf56	0.271973	0.370751
ENSG00000162757	C1orf74	-0.105591	0.922792
ENSG00000108561	C1QBP	-0.20421	0.176164
ENSG00000131094	C1QL1	-0.296429	0.522044
ENSG00000186897	C1QL4	-0.730141	0.562669
ENSG00000173918	C1QTNF1	1.0049	1.26158e-20
ENSG00000184163	C1QTNF12	-0.877823	0.0127785
ENSG00000145861	C1QTNF2	-1.05532	5.42279e-05
ENSG00000082196	C1QTNF3	-0.201295	0.776743
ENSG00000172247	C1QTNF4	-0.30361	0.5419
ENSG00000223953	C1QTNF5	0.288662	0.805923
ENSG00000133466	C1QTNF6	0.310574	0.0520498
ENSG00000163145	C1QTNF7	1.50561	2.51755e-25
ENSG00000240654	C1QTNF9	-0.60926	0.40891
ENSG00000205863	C1QTNF9B	-0.706354	0.179557
ENSG00000159403	C1R	1.17953	1.31786e-25
ENSG00000139178	C1RL	0.875155	1.82401e-14
ENSG00000182326	C1S	0.689025	4.48545e-09
ENSG00000166278	C2	-0.166626	0.896347
ENSG00000258713	C20orf141	1.10234	0.508971
ENSG00000198547	C20orf203	-0.954958	0.378565
ENSG00000196421	C20orf204	0.0537076	0.982409
ENSG00000196476	C20orf96	-0.198005	0.514697
ENSG00000160298	C21orf58	-0.11507	0.800428
ENSG00000154642	C21orf91	-0.350045	0.0563894
ENSG00000169314	C22orf15	0.224182	0.844552
ENSG00000128346	C22orf23	0.217754	0.728993
ENSG00000242259	C22orf39	0.217555	0.286765
ENSG00000157617	C2CD2	-0.227248	0.132324
ENSG00000172375	C2CD2L	0.0921684	0.755866
ENSG00000168014	C2CD3	-0.0241644	0.927797
ENSG00000183186	C2CD4C	0.06975	0.969001
ENSG00000111731	C2CD5	0.041113	0.889696
ENSG00000155754	C2CD6	0.0380345	0.964018
ENSG00000273045	C2orf15	0.207294	0.857763
ENSG00000221843	C2orf16	-0.956728	0.545887
ENSG00000115998	C2orf42	-0.122919	0.682903
ENSG00000135974	C2orf49	0.317234	0.0435433
ENSG00000150873	C2orf50	0.960786	0.539291
ENSG00000187944	C2orf66	0.379076	0.690639
ENSG00000168887	C2orf68	-0.0822028	0.751572
ENSG00000178074	C2orf69	0.134531	0.617495
ENSG00000204128	C2orf72	0.997808	0.0849579
ENSG00000177994	C2orf73	0.31295	0.84799
ENSG00000237651	C2orf74	-0.179838	0.890884
ENSG00000186132	C2orf76	0.308359	0.271354
ENSG00000284308	C2orf81	-0.096826	0.898196
ENSG00000187699	C2orf88	1.51725	1.42798e-10
ENSG00000228486	C2orf92	0.024402	0.979347
ENSG00000125730	C3	2.30708	2.18726e-22
ENSG00000171860	C3AR1	-0.810853	0.283107
ENSG00000114405	C3orf14	-0.0326477	0.942864
ENSG00000088543	C3orf18	0.19057	0.39633
ENSG00000131379	C3orf20	0.597868	0.579843
ENSG00000174928	C3orf33	0.00234672	0.999169
ENSG00000179021	C3orf38	-0.0466864	0.872517
ENSG00000114529	C3orf52	-0.941913	7.85653e-05
ENSG00000188315	C3orf62	0.117589	0.783175
ENSG00000187068	C3orf70	0.234266	0.432895
ENSG00000180044	C3orf80	-3.21321	1.64943e-21
ENSG00000244731	C4A	0.120837	0.863604
ENSG00000224389	C4B	0.170736	0.778793
ENSG00000164096	C4orf3	0.216031	0.13699
ENSG00000151470	C4orf33	-0.0705009	0.875952
ENSG00000163633	C4orf36	0.222787	0.886998
ENSG00000205208	C4orf46	-0.0601418	0.860332
ENSG00000205129	C4orf47	0.32222	0.757113
ENSG00000243449	C4orf48	0.258257	0.208469
ENSG00000106804	C5	0.116085	0.802436
ENSG00000197405	C5AR1	0.525254	0.09635
ENSG00000134830	C5AR2	3.24024	1.04547e-07
ENSG00000113583	C5orf15	0.147281	0.382489
ENSG00000082213	C5orf22	0.0809997	0.742677
ENSG00000181904	C5orf24	0.174566	0.269007
ENSG00000172244	C5orf34	-0.0754387	0.901093
ENSG00000178776	C5orf46	-0.202992	0.647737
ENSG00000164241	C5orf63	-0.125755	0.814413
ENSG00000039537	C6	0.572639	0.662559
ENSG00000185127	C6orf120	0.156798	0.359523
ENSG00000188112	C6orf132	-0.735934	6.26812e-08
ENSG00000204564	C6orf136	0.0737119	0.896973
ENSG00000197261	C6orf141	-1.51601	4.89357e-05
ENSG00000203872	C6orf163	-0.564114	0.38627
ENSG00000221821	C6orf226	-0.0233256	0.966192
ENSG00000137434	C6orf52	0.492119	0.621477
ENSG00000184530	C6orf58	-1.98243	0.156775
ENSG00000112308	C6orf62	0.0575907	0.806395
ENSG00000198663	C6orf89	0.581648	4.97859e-07
ENSG00000112936	C7	0.624343	0.50892
ENSG00000136197	C7orf25	0.0521323	0.867912
ENSG00000153790	C7orf31	0.272747	0.37784
ENSG00000146540	C7orf50	-0.294696	0.0404151
ENSG00000164746	C7orf57	2.72529	0.00231219
ENSG00000176919	C8G	-0.188868	0.838265
ENSG00000182307	C8orf33	-0.125912	0.512178
ENSG00000165084	C8orf34	-0.0711813	0.874818
ENSG00000288602	C8orf44-SGK3	-0.328709	0.849906
ENSG00000164743	C8orf48	0.310187	0.380421
ENSG00000241852	C8orf58	-0.338063	0.0457299
ENSG00000189376	C8orf76	0.180313	0.647737
ENSG00000213563	C8orf82	0.121619	0.592144
ENSG00000253250	C8orf88	0.246147	0.388722
ENSG00000113600	C9	1.06218	0.0646371
ENSG00000188959	C9orf152	0.909359	0.208189
ENSG00000187753	C9orf153	2.09728	0.0276187
ENSG00000164972	C9orf24	0.482748	0.715276
ENSG00000135045	C9orf40	-0.232881	0.381986
ENSG00000157653	C9orf43	0.476612	0.449595
ENSG00000179058	C9orf50	-0.21869	0.78023
ENSG00000165118	C9orf64	-0.145022	0.534211
ENSG00000147894	C9orf72	0.350601	0.152554
ENSG00000136819	C9orf78	-0.104349	0.596995
ENSG00000155621	C9orf85	-0.00551016	0.993917
ENSG00000063180	CA11	-0.518386	0.00864978
ENSG00000074410	CA12	-0.666965	6.26355e-08
ENSG00000185015	CA13	-0.150879	0.795661
ENSG00000167434	CA4	1.50183	0.205645
ENSG00000169239	CA5B	-0.0652772	0.818227
ENSG00000178538	CA8	4.43688	1.53721e-13
ENSG00000107159	CA9	1.23283	0.213678
ENSG00000120159	CAAP1	-0.0403323	0.902239
ENSG00000135932	CAB39	-0.0274122	0.916395
ENSG00000102547	CAB39L	0.373448	0.0172798
ENSG00000183346	CABCOCO1	0.409118	0.217508
ENSG00000099991	CABIN1	-0.236983	0.0911844
ENSG00000134508	CABLES1	-0.32813	0.249787
ENSG00000149679	CABLES2	-0.0706801	0.82392
ENSG00000100314	CABP7	-0.832916	0.215154
ENSG00000154040	CABYR	-0.202326	0.498584
ENSG00000160325	CACFD1	-0.0709307	0.799034
ENSG00000158966	CACHD1	0.422441	0.0108141
ENSG00000141837	CACNA1A	-0.558825	0.0370447
ENSG00000148408	CACNA1B	0.909945	0.16625
ENSG00000151067	CACNA1C	0.119057	0.533871
ENSG00000157388	CACNA1D	-1.18818	0.00926965
ENSG00000006283	CACNA1G	0.995514	0.000130914
ENSG00000196557	CACNA1H	-0.110456	0.574734
ENSG00000100346	CACNA1I	0.022128	0.995785
ENSG00000153956	CACNA2D1	0.381975	0.00277759
ENSG00000007402	CACNA2D2	0.141694	0.894678
ENSG00000157445	CACNA2D3	0.853153	4.90388e-06
ENSG00000151062	CACNA2D4	-0.0348297	0.959656
ENSG00000067191	CACNB1	-0.433274	0.0317634
ENSG00000165995	CACNB2	2.95697	3.31964e-20
ENSG00000167535	CACNB3	0.141405	0.422914
ENSG00000182389	CACNB4	0.33368	0.720453
ENSG00000075461	CACNG4	-1.06209	0.0182109
ENSG00000130433	CACNG6	-1.24917	0.00178824
ENSG00000105605	CACNG7	-0.659109	0.0416636
ENSG00000142408	CACNG8	-0.663995	0.0833715
ENSG00000105298	CACTIN	-0.13247	0.522375
ENSG00000151893	CACUL1	0.0966259	0.629356
ENSG00000116161	CACYBP	-0.423925	0.00159676
ENSG00000084774	CAD	-0.237626	0.0978993
ENSG00000182985	CADM1	0.423678	0.0753596
ENSG00000105767	CADM4	-0.508956	0.000243393
ENSG00000163618	CADPS	-2.30337	0.000379795
ENSG00000081803	CADPS2	0.422069	0.000923568
ENSG00000164304	CAGE1	2.99431	0.02525
ENSG00000172137	CALB2	-2.35927	1.41009e-49
ENSG00000012822	CALCOCO1	-0.0397573	0.869015
ENSG00000136436	CALCOCO2	0.21812	0.137747
ENSG00000064989	CALCRL	0.018813	0.976373
ENSG00000122786	CALD1	0.0905685	0.692753
ENSG00000138172	CALHM2	0.030715	0.914765
ENSG00000178033	CALHM5	-0.14397	0.451563
ENSG00000188820	CALHM6	-0.446354	0.771188
ENSG00000198668	CALM1	-0.095604	0.641258
ENSG00000143933	CALM2	-0.0778743	0.730232
ENSG00000160014	CALM3	-0.239609	0.0998025
ENSG00000129007	CALML4	0.220306	0.711554
ENSG00000169885	CALML6	-0.344419	0.700723
ENSG00000179218	CALR	0.0828918	0.716512
ENSG00000128595	CALU	0.59332	1.36307e-06
ENSG00000130643	CALY	-0.315987	0.687489
ENSG00000134072	CAMK1	-0.00456579	0.995095
ENSG00000183049	CAMK1D	-0.398244	0.00948506
ENSG00000008118	CAMK1G	0.596509	0.00468816
ENSG00000070808	CAMK2A	-0.680323	0.0280697
ENSG00000058404	CAMK2B	-0.360352	0.755556
ENSG00000145349	CAMK2D	-0.336256	0.00708276
ENSG00000148660	CAMK2G	0.169668	0.305998
ENSG00000162545	CAMK2N1	0.0816223	0.701951
ENSG00000163888	CAMK2N2	-0.922402	9.40894e-05
ENSG00000152495	CAMK4	-1.23018	5.4221e-07
ENSG00000004660	CAMKK1	-0.146175	0.654342
ENSG00000110931	CAMKK2	0.0478853	0.838265
ENSG00000143919	CAMKMT	-0.484466	0.0587386
ENSG00000164615	CAMLG	0.0318224	0.905931
ENSG00000130559	CAMSAP1	-0.296487	0.0281906
ENSG00000118200	CAMSAP2	-0.121982	0.500205
ENSG00000076826	CAMSAP3	0.388772	0.82783
ENSG00000171735	CAMTA1	0.216864	0.221799
ENSG00000108509	CAMTA2	-0.121596	0.513965
ENSG00000111530	CAND1	-0.00397939	0.993695
ENSG00000144712	CAND2	-0.605517	0.000637785
ENSG00000171302	CANT1	-0.178656	0.256233
ENSG00000127022	CANX	0.121684	0.545508
ENSG00000131236	CAP1	-0.138494	0.464358
ENSG00000112186	CAP2	0.240906	0.0847522
ENSG00000042493	CAPG	-0.455831	0.000904763
ENSG00000014216	CAPN1	-0.187266	0.237824
ENSG00000142330	CAPN10	-0.0321442	0.92798
ENSG00000182472	CAPN12	-0.0932261	0.906792
ENSG00000214711	CAPN14	-0.91803	0.565342
ENSG00000103326	CAPN15	-0.163537	0.348959
ENSG00000162909	CAPN2	-0.334845	0.0133172
ENSG00000092529	CAPN3	0.228404	0.746989
ENSG00000149260	CAPN5	-0.238163	0.107406
ENSG00000077274	CAPN6	2.98281	6.53144e-73
ENSG00000131375	CAPN7	0.0639075	0.7868
ENSG00000135773	CAPN9	-0.697203	0.552712
ENSG00000126247	CAPNS1	-0.178358	0.284796
ENSG00000256812	CAPNS2	0.0431142	0.976312
ENSG00000135387	CAPRIN1	-0.0373253	0.88542
ENSG00000110888	CAPRIN2	-0.257331	0.196065
ENSG00000105519	CAPS	0.141334	0.751987
ENSG00000180881	CAPS2	0.12183	0.834881
ENSG00000116489	CAPZA1	0.0667309	0.767138
ENSG00000198898	CAPZA2	0.315831	0.0141712
ENSG00000077549	CAPZB	0.00771049	0.983025
ENSG00000100065	CARD10	-1.7305	9.70596e-19
ENSG00000198286	CARD11	-1.35823	5.98514e-08
ENSG00000141527	CARD14	0.21103	0.883048
ENSG00000204397	CARD16	0.226992	0.232662
ENSG00000165233	CARD19	0.13235	0.566351
ENSG00000132357	CARD6	0.142646	0.553751
ENSG00000105483	CARD8	0.123844	0.638149
ENSG00000138380	CARF	0.19998	0.531719
ENSG00000153048	CARHSP1	0.365557	0.00276504
ENSG00000142453	CARM1	-0.0680962	0.75713
ENSG00000079691	CARMIL1	-0.0178173	0.959943
ENSG00000159753	CARMIL2	1.23392	0.00691834
ENSG00000186648	CARMIL3	0.484144	0.695652
ENSG00000156017	CARNMT1	-0.0619492	0.834009
ENSG00000172508	CARNS1	0.376086	0.716512
ENSG00000110619	CARS1	-0.243875	0.0810253
ENSG00000134905	CARS2	0.37391	0.0029446
ENSG00000108349	CASC3	-0.174511	0.268057
ENSG00000127995	CASD1	0.0557061	0.866721
ENSG00000147044	CASK	-0.0943492	0.634325
ENSG00000167971	CASKIN1	0.043142	0.941947
ENSG00000177303	CASKIN2	-0.233519	0.203675
ENSG00000137752	CASP1	-0.141928	0.553607
ENSG00000003400	CASP10	-0.365233	0.154732
ENSG00000204403	CASP12	0.801835	0.174758
ENSG00000106144	CASP2	-0.345137	0.0132879
ENSG00000164305	CASP3	-0.0317473	0.908506
ENSG00000196954	CASP4	-0.0242616	0.927797
ENSG00000138794	CASP6	-0.108826	0.703912
ENSG00000165806	CASP7	0.0724697	0.752948
ENSG00000064012	CASP8	-0.362886	0.0689469
ENSG00000118412	CASP8AP2	-0.0683358	0.834474
ENSG00000132906	CASP9	0.281593	0.182685
ENSG00000143318	CASQ1	-2.15161	0.00713778
ENSG00000087589	CASS4	-1.54688	3.67567e-07
ENSG00000153113	CAST	0.353257	0.00616194
ENSG00000239282	CASTOR1	0.258825	0.590618
ENSG00000274070	CASTOR2	0.570984	5.60166e-07
ENSG00000130940	CASZ1	0.370467	0.398528
ENSG00000121691	CAT	0.766922	8.04795e-12
ENSG00000175294	CATSPER1	-1.4727	0.0973192
ENSG00000166762	CATSPER2	-0.283805	0.76514
ENSG00000152705	CATSPER3	0.419536	0.49267
ENSG00000179397	CATSPERE	0.428943	0.282358
ENSG00000099338	CATSPERG	0.78146	0.238659
ENSG00000105974	CAV1	-0.713954	8.00498e-10
ENSG00000105971	CAV2	-0.33512	0.00724608
ENSG00000177469	CAVIN1	-0.258494	0.0893109
ENSG00000168497	CAVIN2	0.187416	0.535278
ENSG00000170955	CAVIN3	0.132306	0.458272
ENSG00000170681	CAVIN4	-0.149326	0.779758
ENSG00000099625	CBARP	-0.372764	0.0419216
ENSG00000078699	CBFA2T2	-0.124047	0.622164
ENSG00000067955	CBFB	-0.338112	0.00976845
ENSG00000110395	CBL	-0.211103	0.149373
ENSG00000114423	CBLB	0.647787	7.54502e-09
ENSG00000105879	CBLL1	-0.0761	0.770038
ENSG00000141668	CBLN2	-3.45335	0.000394369
ENSG00000139899	CBLN3	-0.147618	0.653378
ENSG00000159228	CBR1	-0.0674554	0.767406
ENSG00000159231	CBR3	-0.642645	0.000607128
ENSG00000145439	CBR4	0.285723	0.149373
ENSG00000160200	CBS	0.214621	0.488917
ENSG00000108468	CBX1	-0.436561	0.000238998
ENSG00000173894	CBX2	-0.296243	0.298911
ENSG00000122565	CBX3	0.117272	0.525829
ENSG00000141582	CBX4	0.0129053	0.966079
ENSG00000094916	CBX5	-0.336316	0.00869532
ENSG00000183741	CBX6	0.156515	0.364785
ENSG00000100307	CBX7	0.191236	0.3756
ENSG00000141570	CBX8	0.0615037	0.870643
ENSG00000100211	CBY1	0.158756	0.455917
ENSG00000132024	CC2D1A	-0.127386	0.516861
ENSG00000154222	CC2D1B	-0.172308	0.319866
ENSG00000048342	CC2D2A	-0.0139694	0.962813
ENSG00000060339	CCAR1	0.0155181	0.954044
ENSG00000158941	CCAR2	-0.079549	0.700695
ENSG00000183287	CCBE1	1.51049	8.485e-21
ENSG00000135736	CCDC102A	0.171438	0.410064
ENSG00000150636	CCDC102B	0.126736	0.818775
ENSG00000167131	CCDC103	-0.302031	0.413794
ENSG00000173581	CCDC106	-0.0157598	0.963671
ENSG00000159884	CCDC107	0.110228	0.596414
ENSG00000168491	CCDC110	0.0818417	0.956576
ENSG00000164221	CCDC112	0.104799	0.762203
ENSG00000103021	CCDC113	-0.3777	0.286096
ENSG00000136710	CCDC115	-0.0464895	0.880691
ENSG00000161180	CCDC116	0.00975547	0.997426
ENSG00000159873	CCDC117	0.0414029	0.869584
ENSG00000160799	CCDC12	-0.134912	0.567722
ENSG00000147144	CCDC120	-0.0808348	0.83694
ENSG00000176714	CCDC121	0.288984	0.521992
ENSG00000151773	CCDC122	-0.0020414	0.999169
ENSG00000007080	CCDC124	-0.148443	0.401763
ENSG00000183323	CCDC125	-0.261651	0.50892
ENSG00000169193	CCDC126	0.364028	0.127611
ENSG00000164366	CCDC127	0.13337	0.490657
ENSG00000100147	CCDC134	-0.0556303	0.870451
ENSG00000128596	CCDC136	-0.446839	0.0407622
ENSG00000185298	CCDC137	-0.0815105	0.74794
ENSG00000163006	CCDC138	0.0430535	0.939782
ENSG00000175455	CCDC14	-0.473427	8.46625e-05
ENSG00000135637	CCDC142	0.0795403	0.83043
ENSG00000170160	CCDC144A	-0.110058	0.854949
ENSG00000135205	CCDC146	-0.210353	0.669699
ENSG00000153237	CCDC148	-0.200584	0.810122
ENSG00000181982	CCDC149	-0.124569	0.59383
ENSG00000149548	CCDC15	-0.820593	0.0133266
ENSG00000144395	CCDC150	-0.567324	0.194629
ENSG00000198865	CCDC152	0.298478	0.523393
ENSG00000248712	CCDC153	0.63182	0.0950052
ENSG00000197599	CCDC154	-1.10918	0.0663994
ENSG00000187860	CCDC157	0.289397	0.395022
ENSG00000163749	CCDC158	-0.566528	0.712403
ENSG00000183401	CCDC159	0.0794118	0.84859
ENSG00000203952	CCDC160	1.1415	0.0512789
ENSG00000280670	CCDC163	-0.0322501	0.960664
ENSG00000198937	CCDC167	-0.316637	0.19213
ENSG00000175820	CCDC168	0.106425	0.91488
ENSG00000242715	CCDC169	-0.211906	0.697134
ENSG00000159588	CCDC17	-0.0293098	0.983821
ENSG00000120262	CCDC170	1.85385	7.43866e-27
ENSG00000164989	CCDC171	-0.560261	0.0552714
ENSG00000154781	CCDC174	-0.0730788	0.794895
ENSG00000122483	CCDC18	-0.293142	0.42017
ENSG00000117477	CCDC181	-0.36791	0.746206
ENSG00000213213	CCDC183	0.59331	0.312268
ENSG00000177875	CCDC184	1.5065	2.65217e-09
ENSG00000165813	CCDC186	0.00956289	0.98221
ENSG00000260220	CCDC187	0.300027	0.866026
ENSG00000234409	CCDC188	0.563848	0.184031
ENSG00000185860	CCDC190	-0.261404	0.793897
ENSG00000163617	CCDC191	0.00300568	0.998633
ENSG00000230561	CCDC192	2.67649	2.55747e-05
ENSG00000269720	CCDC194	0.464467	0.759884
ENSG00000101997	CCDC22	-0.107948	0.718072
ENSG00000159214	CCDC24	-0.180498	0.718915
ENSG00000147419	CCDC25	-0.0438308	0.865961
ENSG00000024862	CCDC28A	0.0917131	0.767196
ENSG00000160050	CCDC28B	-0.818833	2.78899e-06
ENSG00000151468	CCDC3	0.263504	0.743508
ENSG00000186409	CCDC30	0.418704	0.334972
ENSG00000128891	CCDC32	-0.0179986	0.962002
ENSG00000140481	CCDC33	-1.46476	0.000514893
ENSG00000109881	CCDC34	-0.282574	0.363274
ENSG00000141519	CCDC40	-0.0387591	0.931019
ENSG00000161973	CCDC42	-0.189703	0.924141
ENSG00000180329	CCDC43	-0.0741071	0.772171
ENSG00000108588	CCDC47	0.102787	0.590472
ENSG00000152492	CCDC50	-0.274976	0.0447234
ENSG00000164051	CCDC51	0.0719057	0.827163
ENSG00000176155	CCDC57	-0.138561	0.636918
ENSG00000133773	CCDC59	-0.081757	0.785096
ENSG00000108091	CCDC6	-0.177146	0.268359
ENSG00000104983	CCDC61	-0.181425	0.608795
ENSG00000130783	CCDC62	-0.506134	0.474383
ENSG00000139537	CCDC65	-0.162277	0.827163
ENSG00000180376	CCDC66	0.248577	0.345798
ENSG00000166510	CCDC68	1.81463	4.50138e-16
ENSG00000198624	CCDC69	1.41925	1.25416e-16
ENSG00000216937	CCDC7	0.0299836	0.964935
ENSG00000177352	CCDC71	-0.0472098	0.872553
ENSG00000253276	CCDC71L	0.432111	0.000258361
ENSG00000163040	CCDC74A	-0.642434	0.000275134
ENSG00000152076	CCDC74B	0.130184	0.774803
ENSG00000120647	CCDC77	0.0193203	0.969001
ENSG00000162004	CCDC78	-0.24935	0.708772
ENSG00000169515	CCDC8	-0.0978489	0.652831
ENSG00000091986	CCDC80	0.143931	0.437392
ENSG00000149201	CCDC81	-0.916745	4.11223e-10
ENSG00000149231	CCDC82	0.0776196	0.784149
ENSG00000055813	CCDC85A	0.918963	1.64678e-05
ENSG00000175602	CCDC85B	-0.528528	5.93279e-06
ENSG00000205476	CCDC85C	-0.34722	0.0287313
ENSG00000110104	CCDC86	-0.339305	0.0296866
ENSG00000182791	CCDC87	0.54274	0.240641
ENSG00000115355	CCDC88A	-0.483297	6.89097e-05
ENSG00000168071	CCDC88B	0.257865	0.544499
ENSG00000015133	CCDC88C	2.36079	0.00554007
ENSG00000179071	CCDC89	0.062694	0.914252
ENSG00000105321	CCDC9	-0.189061	0.338022
ENSG00000137500	CCDC90B	-0.211856	0.183721
ENSG00000123106	CCDC91	-0.0218132	0.944711
ENSG00000119242	CCDC92	-0.142857	0.599985
ENSG00000125633	CCDC93	-0.172966	0.300373
ENSG00000173013	CCDC96	0.131825	0.767675
ENSG00000142039	CCDC97	-0.122104	0.611316
ENSG00000188549	CCDC9B	-0.00173118	0.998588
ENSG00000204536	CCHCR1	-0.391645	0.144692
ENSG00000185972	CCIN	-1.08498	2.89013e-06
ENSG00000172156	CCL11	1.81834	0.233364
ENSG00000108691	CCL2	0.617559	0.000193839
ENSG00000006606	CCL26	0.848598	0.00457502
ENSG00000151882	CCL28	-0.0439002	0.959564
ENSG00000108688	CCL7	0.0677471	0.957458
ENSG00000108700	CCL8	4.18207	8.43774e-08
ENSG00000136280	CCM2	-0.196439	0.213703
ENSG00000142871	CCN1	-0.49922	5.74812e-05
ENSG00000118523	CCN2	-0.251253	0.115613
ENSG00000136999	CCN3	-0.280794	0.503343
ENSG00000104415	CCN4	1.56301	3.99502e-44
ENSG00000064205	CCN5	1.79762	1.5358e-09
ENSG00000133101	CCNA1	1.34195	0.00203086
ENSG00000145386	CCNA2	-1.01413	1.01264e-07
ENSG00000134057	CCNB1	-1.02729	9.99053e-11
ENSG00000100814	CCNB1IP1	-0.267261	0.0654873
[truncated: 12,704 more rows]

## Sheet: S3
Differentially expressed (FDR<0.01; Log2(FC) ≥ |1|)					Venn Diagram Lists From Figure 1
P-UP	NP-UP	P-DOWN	NP-DOWN		Common UP	Common DOWN	Only Preg UP	Only NP-UP	Only Preg-DOWN	Only NP-DOWN
A4GALT	A4GALT	ABCA12	ABCA12	#VALUE!	A4GALT	ABCA12	C11orf86	ADORA2A	BEGAIN	C1ORF198
AADAC	AADAC	AC008687.4	AC008687.4		AADAC	AC008687.4	C11orf87	ALOX15B	C1orf198	C3ORF80
AADACL4	AADACL4	AC068831.7	AC068831.7		AADACL4	AC068831.7	C1orf167	ANXA8L1	C3orf80	C6ORF141
ABCA4	ABCA4	ACHE	ACHE		ABCA4	ACHE	C1orf21	BTC	C6orf141	CHRNA1
ABCA6	ABCA6	ACKR4	ACKR4		ABCA6	ACKR4	C1orf226	C11ORF86	CNTFR	HRK
ABCA8	ABCA8	ACP5	ACP5		ABCA8	ACP5	C2orf88	C11ORF87	DPP6	IRF8
ABCA9	ABCA9	ACVR1C	ACVR1C		ABCA9	ACVR1C	C7orf57	C1ORF167	EPHA6	KCNH6
ABCC9	ABCC9	ADAMTS16	ADAMTS16		ABCC9	ADAMTS16	RIMS2	C1ORF21	KRT33B	KCNQ5
ABLIM2	ABLIM2	ADAMTS19	ADAMTS19		ABLIM2	ADAMTS19	SSTR2	C1ORF226	LHFPL1	MUC19
ACER2	ACER2	ADCY4	ADCY4		ACER2	ADCY4		C2ORF88	PRCD	XIRP1
ACKR3	ACKR3	ADRA1D	ADRA1D		ACKR3	ADRA1D		C7ORF57
ADAMTS1	ADAMTS1	ADTRP	ADTRP		ADAMTS1	ADTRP		CHI3L2
ADAMTS15	ADAMTS15	AFAP1L2	AFAP1L2		ADAMTS15	AFAP1L2		CST2
ADAMTS8	ADAMTS8	AGT	AGT		ADAMTS8	AGT		CX3CR1
ADAMTS9	ADAMTS9	AK5	AK5		ADAMTS9	AK5		CYP4B1
ADAMTSL4	ADAMTSL4	ALKAL1	ALKAL1		ADAMTSL4	ALKAL1		DAPP1
ADARB1	ADARB1	ANKRD34A	ANKRD34A		ADARB1	ANKRD34A		FABP2
ADGRB3	ADGRB3	ANO1	ANO1		ADGRB3	ANO1		FGL1
ADGRF4	ADGRF4	ANXA3	ANXA3		ADGRF4	ANXA3		HPGDS
ADGRL3	ADGRL3	APCDD1L	APCDD1L		ADGRL3	APCDD1L		KERA
ADH1B	ADH1B	APLN	APLN		ADH1B	APLN		KRT85
ADH1C	ADH1C	APOBEC3B	APOBEC3B		ADH1C	APOBEC3B		PXT1
ADRA1B	ADORA2A	AQP1	AQP1		ADRA1B	AQP1		SLC22A3
ADRA2C	ADRA1B	ARHGAP25	ARHGAP25		ADRA2C	ARHGAP25		SMOC2
ADRB2	ADRA2C	ARHGAP27	ARHGAP27		ADRB2	ARHGAP27		TRH
AKR1C1	ADRB2	ARL4C	ARL4C		AKR1C1	ARL4C		TRIM54
ALDH1A1	AKR1C1	ART5	ART5		ALDH1A1	ART5		WNT16
ALDH1L1	ALDH1A1	ASF1B	ASF1B		ALDH1L1	ASF1B		ZP1
ALDH2	ALDH1L1	ASGR1	ASGR1		ALDH2	ASGR1
ALDH8A1	ALDH2	ASXL3	ASXL3		ALDH8A1	ASXL3
ALOX5AP	ALDH8A1	ATAD5	ATAD5		ALOX5AP	ATAD5
ANG	ALOX15B	ATF3	ATF3		ANG	ATF3
ANGPT1	ALOX5AP	ATP8B1	ATP8B1		ANGPT1	ATP8B1
ANGPT2	ANG	AUNIP	AUNIP		ANGPT2	AUNIP
ANGPTL1	ANGPT1	AURKB	AURKB		ANGPTL1	AURKB
ANO3	ANGPT2	B3GALT1	B3GALT1		ANO3	B3GALT1
ANXA13	ANGPTL1	BAALC	BAALC		ANXA13	BAALC
AOC3	ANO3	BBC3	BBC3		AOC3	BBC3
AP3B2	ANXA13	BCAN	BCAN		AP3B2	BCAN
APOB	ANXA8L1	BEGAIN	BEX2		APOB	BEX2
APOD	AOC3	BEX2	BHLHE41		APOD	BHLHE41
APOL4	AP3B2	BHLHE41	BIRC5		APOL4	BIRC5
AQP8	APOB	BIRC5	BLM		AQP8	BLM
ARHGAP28	APOD	BLM	BUB1		ARHGAP28	BUB1
ARHGEF19	APOL4	BUB1	BUB1B		ARHGEF19	BUB1B
ARMC12	AQP8	BUB1B	C1ORF198		ARMC12	C1QTNF2
ATOH8	ARHGAP28	C1orf198	C1QTNF2		ATOH8	CACNA1D
ATP1A2	ARHGEF19	C1QTNF2	C3ORF80		ATP1A2	CACNG6
ATP8A1	ARMC12	C3orf80	C6ORF141		ATP8A1	CADPS
ATP8B4	ATOH8	C6orf141	CACNA1D		ATP8B4	CALB2
AVPR1A	ATP1A2	CACNA1D	CACNG6		AVPR1A	CAMK4
AXIN2	ATP8A1	CACNG6	CADPS		AXIN2	CARD10
B3GALT5	ATP8B4	CADPS	CALB2		B3GALT5	CARD11
BCO2	AVPR1A	CALB2	CAMK4		BCO2	CASQ1
BMP2	AXIN2	CAMK4	CARD10		BMP2	CASS4
BMP6	B3GALT5	CARD10	CARD11		BMP6	CBLN2
BMP8A	BCO2	CARD11	CASQ1		BMP8A	CCDC33
BTLA	BMP2	CASQ1	CASS4		BTLA	CCIN
C11orf86	BMP6	CASS4	CBLN2		C1GALT1C1	CCNA2
C11orf87	BMP8A	CBLN2	CCDC33		C1QTNF1	CCNB1
C1GALT1C1	BTC	CCDC33	CCIN		C1QTNF7	CCNB2
C1orf167	BTLA	CCIN	CCNA2		C1R	CCNE2
C1orf21	C11ORF86	CCNA2	CCNB1		C3	CCNJL
C1orf226	C11ORF87	CCNB1	CCNB2		C5AR2	CCRL2
C1QTNF1	C1GALT1C1	CCNB2	CCNE2		CA8	CDC20
C1QTNF7	C1ORF167	CCNE2	CCNJL		CACNB2	CDC25C
C1R	C1ORF21	CCNJL	CCRL2		CAPN6	CDC42BPG
C2orf88	C1ORF226	CCRL2	CDC20		CARMIL2	CDC45
C3	C1QTNF1	CDC20	CDC25C		CCBE1	CDC6
C5AR2	C1QTNF7	CDC25C	CDC42BPG		CCDC170	CDCA2
C7orf57	C1R	CDC42BPG	CDC45		CCDC184	CDCA3
CA8	C2ORF88	CDC45	CDC6		CCDC192	CDCA8
CACNB2	C3	CDC6	CDCA2		CCDC68	CDCP1
CAPN6	C5AR2	CDCA2	CDCA3		CCDC69	CDK1
CARMIL2	C7ORF57	CDCA3	CDCA8		CCDC88C	CDK15
CCBE1	CA8	CDCA8	CDCP1		CCL8	CDT1
CCDC170	CACNB2	CDCP1	CDK1		CCN4	CENPA
CCDC184	CAPN6	CDK1	CDK15		CCN5	CENPF
CCDC192	CARMIL2	CDK15	CDT1		CCNA1	CENPH
CCDC68	CCBE1	CDT1	CENPA		CCR7	CENPM
CCDC69	CCDC170	CENPA	CENPF		CD14	CENPU
CCDC88C	CCDC184	CENPF	CENPH		CD1D	CEP55
CCL8	CCDC192	CENPH	CENPM		CD226	CFAP251
CCN4	CCDC68	CENPM	CENPU		CD302	CHDH
CCN5	CCDC69	CENPU	CEP55		CD83	CHODL
CCNA1	CCDC88C	CEP55	CFAP251		CDH26	CHRM2
CCR7	CCL8	CFAP251	CHDH		CDKL1	CIT
CD14	CCN4	CHDH	CHODL		CDKN1C	CKAP2L
CD1D	CCN5	CHODL	CHRM2		CEACAM1	CLDN1
CD226	CCNA1	CHRM2	CHRNA1		CEBPA	CLDN11
CD302	CCR7	CIT	CIT		CEBPD	CLDN16
CD83	CD14	CKAP2L	CKAP2L		CELF2	CLEC14A
CDH26	CD1D	CLDN1	CLDN1		CERS6	CLSPN
CDKL1	CD226	CLDN11	CLDN11		CES1	CNIH3
CDKN1C	CD302	CLDN16	CLDN16		CFAP54	COL13A1
CEACAM1	CD83	CLEC14A	CLEC14A		CFD	COL16A1
CEBPA	CDH26	CLSPN	CLSPN		CFH	COL19A1
CEBPD	CDKL1	CNIH3	CNIH3		CGA	COL25A1
CELF2	CDKN1C	CNTFR	COL13A1		CGREF1	COL6A6
CERS6	CEACAM1	COL13A1	COL16A1		CHN2	CPA4
CES1	CEBPA	COL16A1	COL19A1		CHRDL2	CPA5
CFAP54	CEBPD	COL19A1	COL25A1		CHST11	CREB5
CFD	CELF2	COL25A1	COL6A6		CHST2	CRYBG1
CFH	CERS6	COL6A6	CPA4		CHST7	CX3CL1
CGA	CES1	CPA4	CPA5		CIDEC	CYTIP
CGREF1	CFAP54	CPA5	CREB5		CILP	DACH1
CHN2	CFD	CREB5	CRYBG1		CMPK2	DACT3
CHRDL2	CFH	CRYBG1	CX3CL1		CNR1	DCDC2
CHST11	CGA	CX3CL1	CYTIP		COL14A1	DCSTAMP
CHST2	CGREF1	CYTIP	DACH1		COL15A1	DDIAS
CHST7	CHI3L2	DACH1	DACT3		COL18A1	DDIT4L
CIDEC	CHN2	DACT3	DCDC2		COL28A1	DENND2A
CILP	CHRDL2	DCDC2	DCSTAMP		COL4A3	DEPDC1
CMPK2	CHST11	DCSTAMP	DDIAS		COL4A4	DEPDC1B
CNR1	CHST2	DDIAS	DDIT4L		COL4A6	DES
COL14A1	CHST7	DDIT4L	DENND2A		COLEC12	DGKI
COL15A1	CIDEC	DENND2A	DEPDC1		COMP	DKK1
COL18A1	CILP	DEPDC1	DEPDC1B		CORIN	DKK2
COL28A1	CMPK2	DEPDC1B	DES		CPM	DLGAP5
COL4A3	CNR1	DES	DGKI		CPZ	DLL4
COL4A4	COL14A1	DGKI	DKK1		CREG1	DNMT3B
COL4A6	COL15A1	DKK1	DKK2		CRISPLD2	DOCK10
COLEC12	COL18A1	DKK2	DLGAP5		CRLF1	DOCK2
COMP	COL28A1	DLGAP5	DLL4		CRTAM	DOK5
CORIN	COL4A3	DLL4	DNMT3B		CRYGN	DPF3
CPM	COL4A4	DNMT3B	DOCK10		CSF3R	DTL
CPZ	COL4A6	DOCK10	DOCK2		CSGALNACT1	DUSP2
CREG1	COLEC12	DOCK2	DOK5		CST11	DUSP6
CRISPLD2	COMP	DOK5	DPF3		CXADR	DYRK2
CRLF1	CORIN	DPF3	DTL		CXCL1	DYSF
CRTAM	CPM	DPP6	DUSP2		CXCL12	E2F2
CRYGN	CPZ	DTL	DUSP6		CXCL6	E2F7
CSF3R	CREG1	DUSP2	DYRK2		CXCL8	E2F8
CSGALNACT1	CRISPLD2	DUSP6	DYSF		CXXC4	EBF3
CST11	CRLF1	DYRK2	E2F2		CYP1B1	EDN1
CXADR	CRTAM	DYSF	E2F7		CYP26B1	EEPD1
CXCL1	CRYGN	E2F2	E2F8		DCHS2	EGF
CXCL12	CSF3R	E2F7	EBF3		DCN	EGR1
CXCL6	CSGALNACT1	E2F8	EDN1		DEPP1	EGR2
CXCL8	CST11	EBF3	EEPD1		DHRS3	EGR3
CXXC4	CST2	EDN1	EGF		DIRAS2	ELFN2
CYP1B1	CX3CR1	EEPD1	EGR1		DNAH7	ELOVL2
CYP26B1	CXADR	EGF	EGR2		DNAJC12	ENC1
DCHS2	CXCL1	EGR1	EGR3		DNER	EPHA5
DCN	CXCL12	EGR2	ELFN2		DOCK8	EPHB1
DEPP1	CXCL6	EGR3	ELOVL2		DPEP2	EPPK1
DHRS3	CXCL8	ELFN2	ENC1		DPT	ERCC6L
DIRAS2	CXXC4	ELOVL2	EPHA5		EDNRA	ERMN
DNAH7	CYP1B1	ENC1	EPHB1		EDNRB	ESCO2
DNAJC12	CYP26B1	EPHA5	EPPK1		EFCAB12	ESPL1
DNER	CYP4B1	EPHA6	ERCC6L		EFEMP1	ETS1
DOCK8	DAPP1	EPHB1	ERMN		EFHC2	ETV1
DPEP2	DCHS2	EPPK1	ESCO2		EFR3B	ETV4
DPT	DCN	ERCC6L	ESPL1		ELN	EVA1A
EDNRA	DEPP1	ERMN	ETS1		ELOVL3	EVI2A
EDNRB	DHRS3	ESCO2	ETV1		EML6	EXO1
EFCAB12	DIRAS2	ESPL1	ETV4		ENPP1	EXTL1
EFEMP1	DNAH7	ETS1	EVA1A		ENPP2	F2RL1
EFHC2	DNAJC12	ETV1	EVI2A		ENPP4	F2RL2
EFR3B	DNER	ETV4	EXO1		ENTPD1	F2RL3
ELN	DOCK8	EVA1A	EXTL1		EPB41L3	FABP3
ELOVL3	DPEP2	EVI2A	F2RL1		EPYC	FABP4
EML6	DPT	EXO1	F2RL2		ERBB3	FAM111B
ENPP1	EDNRA	EXTL1	F2RL3		ERBIN	FAR2
ENPP2	EDNRB	F2RL1	FABP3		ERC2	FAT3
ENPP4	EFCAB12	F2RL2	FABP4		ERMP1	FAXC
ENTPD1	EFEMP1	F2RL3	FAM111B		ERVMER34-1	FCRLA
EPB41L3	EFHC2	FABP3	FAR2		EVA1C	FCRLB
EPYC	EFR3B	FABP4	FAT3		F3	FGF5
ERBB3	ELN	FAM111B	FAXC		FAM167A	FHOD3
ERBIN	ELOVL3	FAR2	FCRLA		FAM20A	FLT1
ERC2	EML6	FAT3	FCRLB		FAM89A	FNDC5
ERMP1	ENPP1	FAXC	FGF5		FBLN1	FOLR3
ERVMER34-1	ENPP2	FCRLA	FHOD3		FBXL16	FOSL1
EVA1C	ENPP4	FCRLB	FLT1		FBXO32	FOXC2
F3	ENTPD1	FGF5	FNDC5		FGF14	FOXL1
FAM167A	EPB41L3	FHOD3	FOLR3		FGF7	FOXM1
FAM20A	EPYC	FLT1	FOSL1		FIBIN	FOXS1
FAM89A	ERBB3	FNDC5	FOXC2		FKBP5	FRMD4A
FBLN1	ERBIN	FOLR3	FOXL1		FMO2	FRMD5
FBXL16	ERC2	FOSL1	FOXM1		FMO3	FRMPD3
FBXO32	ERMP1	FOXC2	FOXS1		FMOD	FZD7
FGF14	ERVMER34-1	FOXL1	FRMD4A		FNDC3A	GALNT18
FGF7	EVA1C	FOXM1	FRMD5		FOS	GALNT3
FIBIN	F3	FOXS1	FRMPD3		FOXE1	GDF10
FKBP5	FABP2	FRMD4A	FZD7		FOXO1	GDF15
FMO2	FAM167A	FRMD5	GALNT18		FPR1	GDF5
FMO3	FAM20A	FRMPD3	GALNT3		FREM2	GFRA1
FMOD	FAM89A	FZD7	GDF10		FRMD3	GINS2
FNDC3A	FBLN1	GALNT18	GDF15		FSIP1	GLI1
FOS	FBXL16	GALNT3	GDF5		FST	GNG8
FOXE1	FBXO32	GDF10	GFRA1		FXYD1	GPR3
FOXO1	FGF14	GDF15	GINS2		FZD4	GPR37
FPR1	FGF7	GDF5	GLI1		GALNT15	GPR39
FREM2	FGL1	GFRA1	GNG8		GALNT17	GPSM3
FRMD3	FIBIN	GINS2	GPR3		GAS1	GRIN2A
FSIP1	FKBP5	GLI1	GPR37		GCHFR	GRPR
FST	FMO2	GNG8	GPR39		GCNT1	GSG1
FXYD1	FMO3	GPR3	GPSM3		GGT5	GSTA1
FZD4	FMOD	GPR37	GRIN2A		GLB1L2	GTSE1
GALNT15	FNDC3A	GPR39	GRPR		GLIS1	HBD
GALNT17	FOS	GPSM3	GSG1		GLP2R	HBEGF
GAS1	FOXE1	GRIN2A	GSTA1		GLT8D2	HDAC9
GCHFR	FOXO1	GRPR	GTSE1		GLUL	HEPHL1
GCNT1	FPR1	GSG1	HBD		GNAL	HES1
GGT5	FREM2	GSTA1	HBEGF		GNAO1	HJURP
GLB1L2	FRMD3	GTSE1	HDAC9		GNG2	HKDC1
GLIS1	FSIP1	HBD	HEPHL1		GPBAR1	HMGA1
GLP2R	FST	HBEGF	HES1		GPC6	HMGA2
GLT8D2	FXYD1	HDAC9	HJURP		GPM6B	HMMR
GLUL	FZD4	HEPHL1	HKDC1		GPRC5B	HS3ST5
GNAL	GALNT15	HES1	HMGA1		GPX3	HTR1D
GNAO1	GALNT17	HJURP	HMGA2		GREB1	HTR1F
GNG2	GAS1	HKDC1	HMMR		HAND2	IFIT2
GPBAR1	GCHFR	HMGA1	HRK		HDAC4	IGDCC4
GPC6	GCNT1	HMGA2	HS3ST5		HPD	IGFBP5
GPM6B	GGT5	HMMR	HTR1D		HPSE	IGSF23
GPRC5B	GLB1L2	HS3ST5	HTR1F		HRCT1	IL12A
GPX3	GLIS1	HTR1D	IFIT2		HSD11B1	IL17RB
GREB1	GLP2R	HTR1F	IGDCC4		HSD17B6	IL20RA
HAND2	GLT8D2	IFIT2	IGFBP5		HSPA2	IL24
HDAC4	GLUL	IGDCC4	IGSF23		HTR2A	IL27RA
HPD	GNAL	IGFBP5	IL12A		HTRA3	IL32
HPSE	GNAO1	IGSF23	IL17RB		HTRA4	IL34
HRCT1	GNG2	IL12A	IL20RA		ICAM4	IL4I1
HSD11B1	GPBAR1	IL17RB	IL24		ID1	IL6
HSD17B6	GPC6	IL20RA	IL27RA		ID3	IL7R
HSPA2	GPM6B	IL24	IL32		ID4	INAVA
HTR2A	GPRC5B	IL27RA	IL34		IFI44	INSYN2B
HTRA3	GPX3	IL32	IL4I1		IFI44L	IQGAP3
HTRA4	GREB1	IL34	IL6		IFI6	IRAK2
ICAM4	HAND2	IL4I1	IL7R		IGF1	ISLR2
ID1	HDAC4	IL6	INAVA		IGF2	ITGA7
ID3	HPD	IL7R	INSYN2B		IGFBP1	ITGA8
ID4	HPGDS	INAVA	IQGAP3		IGFBP2	ITPRIPL1
IFI44	HPSE	INSYN2B	IRAK2		IGFBP4	KCNA3
IFI44L	HRCT1	IQGAP3	IRF8		IKZF2	KCNC1
IFI6	HSD11B1	IRAK2	ISLR2		IL15	KCND1
IGF1	HSD17B6	ISLR2	ITGA7		IL16	KCNG1
IGF2	HSPA2	ITGA7	ITGA8		IL18R1	KCNIP4
IGFBP1	HTR2A	ITGA8	ITPRIPL1		IL1B	KCNMA1
IGFBP2	HTRA3	ITPRIPL1	KCNA3		IL1R1	KCNN2
IGFBP4	HTRA4	KCNA3	KCNC1		IL1R2	KHDRBS3
IKZF2	ICAM4	KCNC1	KCND1		IL1RL2	KIF14
IL15	ID1	KCND1	KCNG1		ING1	KIF15
IL16	ID3	KCNG1	KCNH6		INHBB	KIF17
IL18R1	ID4	KCNIP4	KCNIP4		INSR	KIF18A
IL1B	IFI44	KCNMA1	KCNMA1		INSRR	KIF18B
IL1R1	IFI44L	KCNN2	KCNN2		IP6K3	KIF20A
IL1R2	IFI6	KHDRBS3	KCNQ5		IRAK3	KIF21B
IL1RL2	IGF1	KIF14	KHDRBS3		IRS2	KIF2C
ING1	IGF2	KIF15	KIF14		ISM2	KIF4A
INHBB	IGFBP1	KIF17	KIF15		ITGA10	KIFC1
INSR	IGFBP2	KIF18A	KIF17		ITGBL1	KIRREL3
INSRR	IGFBP4	KIF18B	KIF18A		ITK	KIT
IP6K3	IKZF2	KIF20A	KIF18B		ITPR1	KLHDC7B
IRAK3	IL15	KIF21B	KIF20A		IYD	KLHL4
IRS2	IL16	KIF2C	KIF21B		JAKMIP2	KNL1
ISM2	IL18R1	KIF4A	KIF2C		KCND2	KRT13
ITGA10	IL1B	KIFC1	KIF4A		KCNE3	KRT15
ITGBL1	IL1R1	KIRREL3	KIFC1		KCNK15	KRT17
ITK	IL1R2	KIT	KIRREL3		KCNK3	KRT19
ITPR1	IL1RL2	KLHDC7B	KIT		KCNK6	KRT34
IYD	ING1	KLHL4	KLHDC7B		KCNS2	LCTL
JAKMIP2	INHBB	KNL1	KLHL4		KCNT2	LFNG
KCND2	INSR	KRT13	KNL1		KDR	LIF
KCNE3	INSRR	KRT15	KRT13		KLF15	LIG1
KCNK15	IP6K3	KRT17	KRT15		KLF9	LIPG
KCNK3	IRAK3	KRT19	KRT17		KLHL23	LRATD2
KCNK6	IRS2	KRT33B	KRT19		KLK10	LRRC15
KCNS2	ISM2	KRT34	KRT34		KRT86	LRRC17
KCNT2	ITGA10	LCTL	LCTL		KYNU	LRRC4C
KDR	ITGBL1	LFNG	LFNG		LAMA3	LRRC7
KLF15	ITK	LHFPL1	LIF		LCP1	LRRN1
KLF9	ITPR1	LIF	LIG1		LDLRAD4	LTC4S
KLHL23	IYD	LIG1	LIPG		LEFTY2	LYPD1
KLK10	JAKMIP2	LIPG	LRATD2		LMO3	LZTS1
KRT86	KCND2	LRATD2	LRRC15		LMO4	MALL
KYNU	KCNE3	LRRC15	LRRC17		LONRF2	MAP3K7CL
LAMA3	KCNK15	LRRC17	LRRC4C		LPAR1	MARCHF4
LCP1	KCNK3	LRRC4C	LRRC7		LRIG1	MB21D2
LDLRAD4	KCNK6	LRRC7	LRRN1		LRPAP1	MCM10
LEFTY2	KCNS2	LRRN1	LTC4S		LRRN2	MCM5
LMO3	KCNT2	LTC4S	LYPD1		LSAMP	MCM7
LMO4	KDR	LYPD1	LZTS1		LTBP1	MEOX1
LONRF2	KERA	LZTS1	MALL		LUM	MICAL2
LPAR1	KLF15	MALL	MAP3K7CL		MAF	MKI67
LRIG1	KLF9	MAP3K7CL	MARCHF4		MAOA	MMP1
LRPAP1	KLHL23	MARCHF4	MB21D2		MAOB	MMP16
LRRN2	KLK10	MB21D2	MCM10		MAP1LC3C	MMP27
LSAMP	KRT85	MCM10	MCM5		MAP7	MOXD1
LTBP1	KRT86	MCM5	MCM7		MARCHF10	MPP4
LUM	KYNU	MCM7	MEOX1		MASP1	MPPED2
MAF	LAMA3	MEOX1	MICAL2		MBNL2	MSC
MAOA	LCP1	MICAL2	MKI67		MCAM	MSTN
MAOB	LDLRAD4	MKI67	MMP1		MCC	MTFR2
MAP1LC3C	LEFTY2	MMP1	MMP16		MEDAG	MXRA5
MAP7	LMO3	MMP16	MMP27		METTL7A	MYBL1
MARCHF10	LMO4	MMP27	MOXD1		MFSD2A	MYBL2
MASP1	LONRF2	MOXD1	MPP4		MMD	MYH2
MBNL2	LPAR1	MPP4	MPPED2		MMP7	MYLK2
MCAM	LRIG1	MPPED2	MSC		MMRN1	MYRF
MCC	LRPAP1	MSC	MSTN		MOB3B	NAV3
MEDAG	LRRN2	MSTN	MTFR2		MSX2	NCAPG
METTL7A	LSAMP	MTFR2	MUC19		MT1F	NCAPH
MFSD2A	LTBP1	MXRA5	MXRA5		MTARC1	NCF2
MMD	LUM	MYBL1	MYBL1		MTUS1	NCKAP5
MMP7	MAF	MYBL2	MYBL2		MTUS2	NEK2
MMRN1	MAOA	MYH2	MYH2		MUSK	NES
MOB3B	MAOB	MYLK2	MYLK2		MX1	NEURL1B
MSX2	MAP1LC3C	MYRF	MYRF		MX2	NFATC2
MT1F	MAP7	NAV3	NAV3		MYCL	NFE2L3
MTARC1	MARCHF10	NCAPG	NCAPG		MYO16	NFKBIE
MTUS1	MASP1	NCAPH	NCAPH		MYOCD	NGF
MTUS2	MBNL2	NCF2	NCF2		MYZAP	NIBAN1
MUSK	MCAM	NCKAP5	NCKAP5		NAALAD2	NIPAL4
MX1	MCC	NEK2	NEK2		NALCN	NOD2
MX2	MEDAG	NES	NES		NDNF	NOG
MYCL	METTL7A	NEURL1B	NEURL1B		NDP	NPBWR1
MYO16	MFSD2A	NFATC2	NFATC2		NDRG1	NPM2
MYOCD	MMD	NFE2L3	NFE2L3		NEGR1	NR5A2
MYZAP	MMP7	NFKBIE	NFKBIE		NID1	NREP
NAALAD2	MMRN1	NGF	NGF		NKAIN1	NRGN
NALCN	MOB3B	NIBAN1	NIBAN1		NKAIN3	NTM
NDNF	MSX2	NIPAL4	NIPAL4		NKD1	NUF2
NDP	MT1F	NOD2	NOD2		NLGN3	OIP5
NDRG1	MTARC1	NOG	NOG		NLGN4X	ORC1
NEGR1	MTUS1	NPBWR1	NPBWR1		NMNAT2	OXTR
NID1	MTUS2	NPM2	NPM2		NNMT	P2RX7
NKAIN1	MUSK	NR5A2	NR5A2		NOX4	PADI2
NKAIN3	MX1	NREP	NREP		NPY1R	PBK
NKD1	MX2	NRGN	NRGN		NR1H4	PCDH1
NLGN3	MYCL	NTM	NTM		NR4A2	PCDH9
NLGN4X	MYO16	NUF2	NUF2		NR4A3	PCLAF
NMNAT2	MYOCD	OIP5	OIP5		NRTN	PDE6G
NNMT	MYZAP	ORC1	ORC1		NT5C1A	PIMREG
NOX4	NAALAD2	OXTR	OXTR		NTN1	PKMYT1
NPY1R	NALCN	P2RX7	P2RX7		NTRK1	PKNOX2
NR1H4	NDNF	PADI2	PADI2		NXPH2	PLA2G4A
NR4A2	NDP	PBK	PBK		NYAP1	PLEK2
NR4A3	NDRG1	PCDH1	PCDH1		OAS1	PLK1
NRTN	NEGR1	PCDH9	PCDH9		OAS2	PLK2
NT5C1A	NID1	PCLAF	PCLAF		OASL	PLK4
NTN1	NKAIN1	PDE6G	PDE6G		OGN	PNPLA3
NTRK1	NKAIN3	PIMREG	PIMREG		OLFML2B	POLQ
NXPH2	NKD1	PKMYT1	PKMYT1		OMD	POSTN
NYAP1	NLGN3	PKNOX2	PKNOX2		OSR2	POU2F2
OAS1	NLGN4X	PLA2G4A	PLA2G4A		OTULINL	PRR11
OAS2	NMNAT2	PLEK2	PLEK2		OTX1	PRSS3
OASL	NNMT	PLK1	PLK1		P2RY1	PRSS35
OGN	NOX4	PLK2	PLK2		P2RY14	PSG3
OLFML2B	NPY1R	PLK4	PLK4		P4HA3	PTGER4
OMD	NR1H4	PNPLA3	PNPLA3		PAK3	PTGS2
OSR2	NR4A2	POLQ	POLQ		PAPLN	PTN
OTULINL	NR4A3	POSTN	POSTN		PARM1	PTPRB
OTX1	NRTN	POU2F2	POU2F2		PC	PTPRC
P2RY1	NT5C1A	PRCD	PRR11		PCBP3	PTPRH
P2RY14	NTN1	PRR11	PRSS3		PCSK1	PTPRR
P4HA3	NTRK1	PRSS3	PRSS35		PCSK5	PTTG1
PAK3	NXPH2	PRSS35	PSG3		PDE10A	RAB39B
PAPLN	NYAP1	PSG3	PTGER4		PDE1A	RAD54L
PARM1	OAS1	PTGER4	PTGS2		PDE4B	RAPGEF3
PC	OAS2	PTGS2	PTN		PDE4D	RASEF
PCBP3	OASL	PTN	PTPRB		PDE7B	RASGRF1
PCSK1	OGN	PTPRB	PTPRC		PDGFD	RASGRF2
PCSK5	OLFML2B	PTPRC	PTPRH		PDGFRA	RASGRP3
PDE10A	OMD	PTPRH	PTPRR		PDGFRL	RASSF2
PDE1A	OSR2	PTPRR	PTTG1		PDK4	RCAN2
PDE4B	OTULINL	PTTG1	RAB39B		PENK	RELN
PDE4D	OTX1	RAB39B	RAD54L		PER1	RENBP
PDE7B	P2RY1	RAD54L	RAPGEF3		PGM2L1	REXO5
PDGFD	P2RY14	RAPGEF3	RASEF		PGM5	RGMB
PDGFRA	P4HA3	RASEF	RASGRF1		PHOSPHO2	RGS20
PDGFRL	PAK3	RASGRF1	RASGRF2		PHYHIP	RGS4
PDK4	PAPLN	RASGRF2	RASGRP3		PI16	RIMS1
PENK	PARM1	RASGRP3	RASSF2		PID1	RNF165
PER1	PC	RASSF2	RCAN2		PIP5K1B	ROBO2
PGM2L1	PCBP3	RCAN2	RELN		PIPOX	ROBO4
PGM5	PCSK1	RELN	RENBP		PISD	RRAD
PHOSPHO2	PCSK5	RENBP	REXO5		PLAC1	RRM2
PHYHIP	PDE10A	REXO5	RGMB		PLBD1	SAMD12
PI16	PDE1A	RGMB	RGS20		PLCE1	SAPCD2
PID1	PDE4B	RGS20	RGS4		PLCL1	SCN9A
PIP5K1B	PDE4D	RGS4	RIMS1		PLPP3	SEL1L3
PIPOX	PDE7B	RIMS1	RNF165		PLXNA4	SERPINB7
PISD	PDGFD	RNF165	ROBO2		PLXNC1	SFRP4
PLAC1	PDGFRA	ROBO2	ROBO4		PODNL1	SGCG
PLBD1	PDGFRL	ROBO4	RRAD		POPDC2	SGO1
PLCE1	PDK4	RRAD	RRM2		PPARGC1A	SH2D5
PLCL1	PENK	RRM2	SAMD12		PPP1R14A	SH3BP1
PLPP3	PER1	SAMD12	SAPCD2		PPP1R36	SH3RF2
PLXNA4	PGM2L1	SAPCD2	SCN9A		PPP2R2B	SHCBP1
PLXNC1	PGM5	SCN9A	SEL1L3		PRDM6	SIGLEC15
PODNL1	PHOSPHO2	SEL1L3	SERPINB7		PRL	SKA1
POPDC2	PHYHIP	SERPINB7	SFRP4		PRLR	SKA3
PPARGC1A	PI16	SFRP4	SGCG		PRND	SLC13A5
PPP1R14A	PID1	SGCG	SGO1		PROSER2	SLC14A1
PPP1R36	PIP5K1B	SGO1	SH2D5		PRR15	SLC20A2
PPP2R2B	PIPOX	SH2D5	SH3BP1		PRRG4	SLC28A3
PRDM6	PISD	SH3BP1	SH3RF2		PSD	SLC35F3
PRL	PLAC1	SH3RF2	SHCBP1		PTGDR	SLC7A14
PRLR	PLBD1	SHCBP1	SIGLEC15		PTGER2	SLCO2A1
PRND	PLCE1	SIGLEC15	SKA1		PTGES	SLIT2
PROSER2	PLCL1	SKA1	SKA3		PTGIS	SMURF2
PRR15	PLPP3	SKA3	SLC13A5		PTGS1	SOCS1
PRRG4	PLXNA4	SLC13A5	SLC14A1		PTPRQ	SORCS3
PSD	PLXNC1	SLC14A1	SLC20A2		PWWP3B	SOX8
PTGDR	PODNL1	SLC20A2	SLC28A3		RAB40A	SOX9
PTGER2	POPDC2	SLC28A3	SLC35F3		RADIL	SP140
PTGES	PPARGC1A	SLC35F3	SLC7A14		RAET1G	SPAG5
PTGIS	PPP1R14A	SLC7A14	SLCO2A1		RAI2	SPC24
PTGS1	PPP1R36	SLCO2A1	SLIT2		RAMP1	SPC25
PTPRQ	PPP2R2B	SLIT2	SMURF2		RARRES1	SRSF12
PWWP3B	PRDM6	SMURF2	SOCS1		RASD1	SSTR1
RAB40A	PRL	SOCS1	SORCS3		RASGRP2	STAC
RADIL	PRLR	SORCS3	SOX8		RASL10B	STX1B
RAET1G	PRND	SOX8	SOX9		RASL11A	SULT1C4
RAI2	PROSER2	SOX9	SP140		RASL11B	SYNPO2L
RAMP1	PRR15	SP140	SPAG5		RASSF4	SYT16
RARRES1	PRRG4	SPAG5	SPC24		RBP4	SYT7
RASD1	PSD	SPC24	SPC25		RDH10	SYTL5
RASGRP2	PTGDR	SPC25	SRSF12		RELL1	TCF19
RASL10B	PTGER2	SRSF12	SSTR1		REN	TCF7
RASL11A	PTGES	SSTR1	STAC		RERG	TENM2
RASL11B	PTGIS	STAC	STX1B		RETREG1	TFAP2A
RASSF4	PTGS1	STX1B	SULT1C4		RGCC	TGFB2
RBP4	PTPRQ	SULT1C4	SYNPO2L		RGMA	TIAM1
RDH10	PWWP3B	SYNPO2L	SYT16		RGS16	TICRR
RELL1	PXT1	SYT16	SYT7		RGS2	TK1
REN	RAB40A	SYT7	SYTL5		RHCE	TLL1
RERG	RADIL	SYTL5	TCF19		RHOB	TMEM132D
RETREG1	RAET1G	TCF19	TCF7		RHOU	TMEM26
RGCC	RAI2	TCF7	TENM2		RIPOR3	TMEM92
RGMA	RAMP1	TENM2	TFAP2A		RMDN2	TNC
RGS16	RARRES1	TFAP2A	TGFB2		RNASE4	TNFRSF9
RGS2	RASD1	TGFB2	TIAM1		RNF144A	TNFSF15
RHCE	RASGRP2	TIAM1	TICRR		RNF182	TNFSF18
RHOB	RASL10B	TICRR	TK1		ROR2	TNFSF4
RHOU	RASL11A	TK1	TLL1		RORB	TNIK
RIMS2	RASL11B	TLL1	TMEM132D		RSAD2	TNNT1
RIPOR3	RASSF4	TMEM132D	TMEM26		RSPO1	TP63
RMDN2	RBP4	TMEM26	TMEM92		RSPO3	TPD52L1
RNASE4	RDH10	TMEM92	TNC		RXFP1	TPX2
RNF144A	RELL1	TNC	TNFRSF9		SAA1	TRIB3
RNF182	REN	TNFRSF9	TNFSF15		SAMD11	TRIM55
ROR2	RERG	TNFSF15	TNFSF18		SAMHD1	TROAP
RORB	RETREG1	TNFSF18	TNFSF4		SAT1	TRPA1
RSAD2	RGCC	TNFSF4	TNIK		SBSN	TSLP
RSPO1	RGMA	TNIK	TNNT1		SCARA5	TSPAN18
RSPO3	RGS16	TNNT1	TP63		SCUBE2	TTK
RXFP1	RGS2	TP63	TPD52L1		SDC2	TXK
SAA1	RHCE	TPD52L1	TPX2		SEMA3B	TYMS
SAMD11	RHOB	TPX2	TRIB3		SEMA4D	UBE2C
SAMHD1	RHOU	TRIB3	TRIM55		SEMA6A	UHRF1
SAT1	RIPOR3	TRIM55	TROAP		SERPIND1	UNC13A
SBSN	RMDN2	TROAP	TRPA1		SERPINF1	VEPH1
SCARA5	RNASE4	TRPA1	TSLP		SERTM2	VWF
SCUBE2	RNF144A	TSLP	TSPAN18		SETBP1	WDR62
SDC2	RNF182	TSPAN18	TTK		SH2D2A	WNK4
SEMA3B	ROR2	TTK	TXK		SHC3	WNT7B
SEMA4D	RORB	TXK	TYMS		SHROOM2	XDH
SEMA6A	RSAD2	TYMS	UBE2C		SIGLEC9	ZNF367
SERPIND1	RSPO1	UBE2C	UHRF1		SIK1	ZNF469
SERPINF1	RSPO3	UHRF1	UNC13A		SIX2	ZNF474
SERTM2	RXFP1	UNC13A	VEPH1		SLA	ZNF608
SETBP1	SAA1	VEPH1	VWF		SLC10A6	ZPLD1
SH2D2A	SAMD11	VWF	WDR62		SLC16A12
SHC3	SAMHD1	WDR62	WNK4		SLC16A6
SHROOM2	SAT1	WNK4	WNT7B		SLC22A31
SIGLEC9	SBSN	WNT7B	XDH		SLC24A3
SIK1	SCARA5	XDH	XIRP1		SLC25A18
SIX2	SCUBE2	ZNF367	ZNF367		SLC2A1
SLA	SDC2	ZNF469	ZNF469		SLC2A12
SLC10A6	SEMA3B	ZNF474	ZNF474		SLC2A5
SLC16A12	SEMA4D	ZNF608	ZNF608		SLC40A1
SLC16A6	SEMA6A	ZPLD1	ZPLD1		SLC44A1
SLC22A31	SERPIND1				SLC46A3
SLC24A3	SERPINF1				SLC47A1
SLC25A18	SERTM2				SLC7A3
SLC2A1	SETBP1				SLC7A8
SLC2A12	SH2D2A				SMAD9
SLC2A5	SHC3				SMIM43
SLC40A1	SHROOM2				SNCA
SLC44A1	SIGLEC9				SNX10
SLC46A3	SIK1				SORBS1
SLC47A1	SIX2				SPARCL1
SLC7A3	SLA				SRGN
SLC7A8	SLC10A6				SST
SMAD9	SLC16A12				STEAP1
SMIM43	SLC16A6				STEAP4
SNCA	SLC22A3				STK26
SNX10	SLC22A31				STMND1
SORBS1	SLC24A3				STON1
SPARCL1	SLC25A18				STXBP5L
SRGN	SLC2A1				SUSD2
SST	SLC2A12				SVIL
SSTR2	SLC2A5				SYN3
STEAP1	SLC40A1				SYT1
STEAP4	SLC44A1				SYT12
STK26	SLC46A3				SYT15B
STMND1	SLC47A1				SYT3
STON1	SLC7A3				SYTL4
STXBP5L	SLC7A8				TACSTD2
SUSD2	SMAD9				TAFA2
SVIL	SMIM43				TCAF2
SYN3	SMOC2				TENT5A
SYT1	SNCA				TEX15
SYT12	SNX10				TFPI2
SYT15B	SORBS1				TGM2
SYT3	SPARCL1				THBD
SYTL4	SRGN				THSD7A
TACSTD2	SST				TIMP3
TAFA2	STEAP1				TLE2
TCAF2	STEAP4				TLE6
TENT5A	STK26				TLR4
TEX15	STMND1				TM4SF1
TFPI2	STON1				TMCC3
TGM2	STXBP5L				TMEM215
THBD	SUSD2				TMEM35A
THSD7A	SVIL				TMEM37
TIMP3	SYN3				TNFRSF1B
TLE2	SYT1				TNFRSF8
TLE6	SYT12				TNFSF10
TLR4	SYT15B				TNNC2
TM4SF1	SYT3				TNS4
TMCC3	SYTL4				TPD52
TMEM215	TACSTD2				TPPP
TMEM35A	TAFA2				TRABD2A
TMEM37	TCAF2				TRABD2B
TNFRSF1B	TENT5A				TRIM29
TNFRSF8	TEX15				TRPC6
TNFSF10	TFPI2				TRPM3
TNNC2	TGM2				TSC22D3
TNS4	THBD				TSKU
TPD52	THSD7A				TST
TPPP	TIMP3				TUBA3D
TRABD2A	TLE2				TWIST2
TRABD2B	TLE6				UNC5C
TRIM29	TLR4				UPK1B
TRPC6	TM4SF1				USP18
TRPM3	TMCC3				VIT
TSC22D3	TMEM215				VTN
TSKU	TMEM35A				WDR86
TST	TMEM37				WIPF3
TUBA3D	TNFRSF1B				WNK2
TWIST2	TNFRSF8				WNT2B
UNC5C	TNFSF10				WNT4
UPK1B	TNNC2				WNT9A
USP18	TNS4				ZBTB16
VIT	TPD52				ZFP92
VTN	TPPP				ZNF488
WDR86	TRABD2A
WIPF3	TRABD2B
WNK2	TRH
WNT2B	TRIM29
WNT4	TRIM54
WNT9A	TRPC6
ZBTB16	TRPM3
ZFP92	TSC22D3
ZNF488	TSKU
	TST
	TUBA3D
	TWIST2
	UNC5C
	UPK1B
	USP18
	VIT
	VTN
	WDR86
	WIPF3
	WNK2
	WNT16
	WNT2B
	WNT4
	WNT9A
	ZBTB16
	ZFP92
	ZNF488
	ZP1

## Sheet: S4
Gene stable ID	HGNC symbol	Log2FC(EPC vs VEH)	FDR
ENSG00000268895	A1BG-AS1	0.330833	0.114466
ENSG00000245105	A2M-AS1	0.123774	0.874413
ENSG00000242908	AADACL2-AS1	-0.359346	0.757526
ENSG00000215458	AATBC	-0.936645	0.263322
ENSG00000281376	ABALON	-0.448096	0.233362
ENSG00000273212	AC000068.2	0.158571	0.823445
ENSG00000243107	AC000120.1	0.290501	0.819393
ENSG00000278727	AC000403.1	-0.731143	0.0985675
ENSG00000237813	AC002066.1	-0.696316	0.371811
ENSG00000248636	AC002070.1	0.664911	0.488949
ENSG00000285090	AC002074.1	0.513871	0.172246
ENSG00000277450	AC002094.4	0.306689	0.805308
ENSG00000248101	AC002116.1	0.315526	0.721661
ENSG00000267698	AC002116.2	-0.345926	0.647375
ENSG00000239791	AC002310.2	-0.851792	0.164288
ENSG00000267328	AC002398.2	0.396778	0.081827
ENSG00000236472	AC002401.1	-0.170765	0.818898
ENSG00000276851	AC002401.4	-0.864041	0.203421
ENSG00000223969	AC002456.1	1.00978	0.00822208
ENSG00000272829	AC002470.1	0.28527	0.732095
ENSG00000261312	AC002550.1	-0.403298	0.642522
ENSG00000276571	AC002550.2	0.254757	0.75124
ENSG00000262265	AC002558.3	0.476921	0.543762
ENSG00000268266	AC003005.2	0.0881209	0.954424
ENSG00000236453	AC003092.1	0.0436267	0.950841
ENSG00000260793	AC003102.1	0.283609	0.635731
ENSG00000279159	AC003681.1	-0.443272	0.23113
ENSG00000268392	AC003682.1	-0.192763	0.877451
ENSG00000236536	AC003986.3	-0.578068	0.436529
ENSG00000273447	AC004067.1	1.03987	0.276674
ENSG00000276449	AC004076.2	-0.0159545	0.987325
ENSG00000253508	AC004080.2	0.352144	0.582332
ENSG00000263272	AC004148.2	-0.276706	0.691668
ENSG00000267666	AC004156.1	-0.649874	0.370011
ENSG00000230333	AC004160.1	3.19567	9.1576e-13
ENSG00000230435	AC004160.2	1.67334	0.101798
ENSG00000274902	AC004241.2	0.0343298	0.980665
ENSG00000276390	AC004241.3	-0.35618	0.606534
ENSG00000268069	AC004466.1	0.839216	0.0705691
ENSG00000274737	AC004466.2	-0.0697804	0.94971
ENSG00000266341	AC004477.2	0.191933	0.732713
ENSG00000278765	AC004477.3	-0.464166	0.597952
ENSG00000272072	AC004492.1	0.0432004	0.970547
ENSG00000262312	AC004494.1	0.230017	0.837129
ENSG00000274177	AC004528.2	0.134694	0.85139
ENSG00000269987	AC004542.2	0.10541	0.941678
ENSG00000266088	AC004585.1	3.72478	4.52927e-06
ENSG00000253102	AC004707.1	0.496675	0.138616
ENSG00000234203	AC004771.2	-0.145895	0.893602
ENSG00000262227	AC004771.3	0.191997	0.703272
ENSG00000262429	AC004771.4	-0.601954	0.255871
ENSG00000250132	AC004803.1	0.2119	0.541442
ENSG00000274818	AC004825.2	0.283198	0.605008
ENSG00000273350	AC004832.5	0.243371	0.865528
ENSG00000258944	AC004846.2	1.12046	0.152044
ENSG00000272768	AC004854.2	-0.318828	0.412916
ENSG00000273419	AC004877.1	-0.192812	0.816763
ENSG00000272812	AC004908.2	-0.542095	0.401436
ENSG00000273402	AC004908.3	0.847262	0.374257
ENSG00000243797	AC004917.1	-2.11029	4.52561e-05
ENSG00000228434	AC004951.1	-0.6462	0.26431
ENSG00000273432	AC004951.4	0.0720806	0.950841
ENSG00000273387	AC005005.3	-0.0964965	0.880582
ENSG00000272361	AC005014.2	-0.550478	0.524044
ENSG00000271452	AC005034.5	-0.183255	0.733022
ENSG00000183308	AC005037.1	0.328707	0.799698
ENSG00000267052	AC005050.1	-1.53687	0.00195301
ENSG00000243004	AC005062.1	1.03376	0.0364073
ENSG00000272918	AC005070.3	0.0156054	0.989923
ENSG00000226816	AC005082.1	-0.294806	0.725849
ENSG00000223374	AC005104.1	0.716559	0.463685
ENSG00000267405	AC005180.1	0.265543	0.791565
ENSG00000266709	AC005224.4	0.457227	0.41124
ENSG00000258695	AC005225.3	0.877481	0.447998
ENSG00000273314	AC005229.4	0.0151342	0.976701
ENSG00000268030	AC005253.1	0.221493	0.737625
ENSG00000268205	AC005261.1	0.166634	0.503779
ENSG00000267139	AC005262.2	0.340702	0.577682
ENSG00000266469	AC005288.1	0.347157	0.507531
ENSG00000267283	AC005306.1	-0.101263	0.883789
ENSG00000248015	AC005329.1	-0.379339	0.405765
ENSG00000267755	AC005329.2	-1.24289	0.21546
ENSG00000280486	AC005329.3	-0.193316	0.754539
ENSG00000274561	AC005332.4	-0.16625	0.728593
ENSG00000277476	AC005332.6	-0.486456	0.0806633
ENSG00000278730	AC005332.7	-0.329135	0.0102304
ENSG00000268565	AC005339.1	-0.471376	0.548385
ENSG00000250994	AC005355.1	-0.00902832	0.996719
ENSG00000268938	AC005387.1	-0.127099	0.912285
ENSG00000275162	AC005391.1	-0.825004	0.474691
ENSG00000276445	AC005393.1	0.104062	0.934378
ENSG00000266368	AC005410.1	-0.214301	0.886642
ENSG00000259005	AC005479.1	-0.073862	0.929041
ENSG00000270000	AC005479.2	-0.134068	0.883789
ENSG00000222012	AC005481.1	0.0993081	0.950025
ENSG00000258559	AC005519.1	-0.0303446	0.962135
ENSG00000273711	AC005520.5	-0.808928	0.29844
ENSG00000269604	AC005523.2	-0.157473	0.784239
ENSG00000235852	AC005540.1	-0.135208	0.775321
ENSG00000266897	AC005546.1	-0.507483	0.590217
ENSG00000214719	AC005562.1	-0.26666	0.469423
ENSG00000261305	AC005586.2	-0.371847	0.488495
ENSG00000260107	AC005606.1	0.0799615	0.921576
ENSG00000261790	AC005606.2	0.274562	0.734474
ENSG00000272070	AC005618.1	-0.101949	0.85926
ENSG00000261596	AC005632.2	-0.0102346	0.995577
ENSG00000262050	AC005696.1	0.989878	0.0318028
ENSG00000264044	AC005726.2	-0.0578495	0.950131
ENSG00000265168	AC005726.4	0.110215	0.943375
ENSG00000271871	AC005740.4	-0.120576	0.93972
ENSG00000266934	AC005746.1	-0.0603969	0.95968
ENSG00000267131	AC005746.2	0.00561876	0.99756
ENSG00000268650	AC005759.1	-0.652801	0.38663
ENSG00000267436	AC005786.3	0.168099	0.72879
ENSG00000274447	AC005790.1	-0.169374	0.88132
ENSG00000265702	AC005821.1	1.35026	0.129552
ENSG00000265971	AC005828.5	2.46774	0.000259726
ENSG00000261335	AC005837.1	-0.651108	0.467849
ENSG00000277382	AC005837.3	-0.680678	0.570581
ENSG00000266538	AC005838.2	0.583453	0.439151
ENSG00000256433	AC005840.2	-0.305686	0.720026
ENSG00000258092	AC005841.1	-0.60118	0.303956
ENSG00000258114	AC005871.2	0.82932	0.442324
ENSG00000266385	AC005899.5	-0.255375	0.846738
ENSG00000274341	AC005899.6	0.123268	0.928146
ENSG00000278668	AC005899.7	0.540122	0.548385
ENSG00000279762	AC005899.8	0.106613	0.898136
ENSG00000278356	AC005911.1	-0.611488	0.503589
ENSG00000262967	AC005921.2	-0.12485	0.913817
ENSG00000267469	AC005944.1	0.464284	0.0739287
ENSG00000267138	AC005954.1	0.692659	0.362356
ENSG00000267205	AC005954.2	-0.97063	0.362226
ENSG00000283538	AC005972.4	0.45001	0.353638
ENSG00000226824	AC006001.2	0.0511803	0.931683
ENSG00000229591	AC006017.1	0.444749	0.704144
ENSG00000234286	AC006026.3	0.839625	0.378332
ENSG00000272908	AC006033.2	-1.47838	0.127088
ENSG00000234141	AC006042.4	0.136509	0.91827
ENSG00000261786	AC006058.1	-0.289398	0.623612
ENSG00000272121	AC006058.3	-0.615623	0.538221
ENSG00000247853	AC006064.2	0.0973971	0.867686
ENSG00000269968	AC006064.4	0.0992853	0.664723
ENSG00000263235	AC006111.2	0.9956	0.34844
ENSG00000264895	AC006141.1	-0.412921	0.714687
ENSG00000256417	AC006206.2	-1.44306	0.20011
ENSG00000267058	AC006213.2	0.321596	0.385893
ENSG00000277806	AC006213.4	-0.0333238	0.965833
ENSG00000278492	AC006213.5	1.03309	0.0928516
ENSG00000274578	AC006249.1	0.604258	0.6038
ENSG00000272473	AC006273.1	0.960922	0.055329
ENSG00000262456	AC006435.1	0.532336	0.467112
ENSG00000265784	AC006441.3	0.139579	0.801537
ENSG00000228509	AC006460.1	0.350215	0.689293
ENSG00000284052	AC006460.2	0.347847	0.616975
ENSG00000273448	AC006480.2	0.357798	0.616106
ENSG00000261770	AC006504.1	-0.263782	0.567102
ENSG00000281468	AC006504.8	0.29188	0.567511
ENSG00000261342	AC006538.1	-0.15671	0.748674
ENSG00000243762	AC006547.2	-0.00226546	0.998953
ENSG00000268292	AC006547.3	-0.0543017	0.959047
ENSG00000273368	AC006566.1	0.12027	0.926448
ENSG00000269194	AC006942.1	1.43973	0.0150757
ENSG00000273203	AC006946.2	-0.738023	0.407329
ENSG00000267055	AC007001.1	1.11642	0.288611
ENSG00000273320	AC007032.1	0.0520991	0.958752
ENSG00000272807	AC007038.2	0.74994	0.307377
ENSG00000261094	AC007066.2	0.126753	0.820391
ENSG00000269151	AC007193.3	-0.572466	0.32432
ENSG00000261560	AC007216.3	0.323298	0.65481
ENSG00000284959	AC007262.2	0.329151	0.798121
ENSG00000267980	AC007292.1	0.0434546	0.949304
ENSG00000269318	AC007292.2	0.496148	0.529333
ENSG00000272600	AC007308.1	0.176345	0.886809
ENSG00000234818	AC007314.1	-0.0916633	0.934573
ENSG00000261997	AC007336.1	0.306643	0.657612
ENSG00000225216	AC007362.1	0.980926	0.0380358
ENSG00000226756	AC007365.1	2.06928	0.0214887
ENSG00000273090	AC007378.1	-0.18554	0.736567
ENSG00000281920	AC007389.5	0.413917	0.687412
ENSG00000272054	AC007390.2	-0.253501	0.642962
ENSG00000235934	AC007405.2	-0.326106	0.75292
ENSG00000261799	AC007406.5	0.0443562	0.921367
ENSG00000283240	AC007529.2	0.416811	0.55445
ENSG00000277595	AC007546.1	0.613044	0.555433
ENSG00000244055	AC007566.1	0.395863	0.252618
ENSG00000255655	AC007570.1	0.205119	0.807671
ENSG00000260086	AC007611.1	-0.123991	0.836055
ENSG00000242539	AC007620.2	0.291422	0.740987
ENSG00000256139	AC007637.1	0.800875	0.0765213
ENSG00000273139	AC007663.3	-0.0514223	0.965566
ENSG00000273343	AC007663.4	-0.790301	0.216118
ENSG00000270571	AC007681.1	-0.356913	0.762522
ENSG00000273729	AC007686.3	-0.116179	0.801582
ENSG00000233251	AC007743.1	1.01809	0.000521195
ENSG00000236841	AC007750.1	0.489929	0.430735
ENSG00000267009	AC007780.1	1.43243	0.0120808
ENSG00000268401	AC007785.3	-0.0847933	0.946602
ENSG00000260743	AC007823.1	0.456118	0.320434
ENSG00000281195	AC007878.1	-0.259804	0.66526
ENSG00000225916	AC007879.2	-0.629625	0.457776
ENSG00000234902	AC007879.3	-0.0174278	0.990074
ENSG00000272735	AC007881.3	0.818887	0.350736
ENSG00000283175	AC007920.2	0.847797	7.97628e-05
ENSG00000266877	AC007923.4	0.0235358	0.991162
ENSG00000259920	AC007938.1	-0.952146	0.26334
ENSG00000270823	AC007938.2	-0.418892	0.43964
ENSG00000270953	AC007938.3	-0.24425	0.634497
ENSG00000276651	AC007950.2	0.601047	0.580515
ENSG00000228157	AC007952.2	0.597933	0.345029
ENSG00000225790	AC007953.1	0.616421	0.389815
ENSG00000277534	AC007996.1	0.119688	0.797061
ENSG00000272369	AC008035.1	0.1607	0.826361
ENSG00000258181	AC008083.2	-0.120917	0.895705
ENSG00000257298	AC008147.2	0.703322	0.0118495
ENSG00000258177	AC008149.1	0.752459	0.386939
ENSG00000273489	AC008264.2	0.586863	0.647252
ENSG00000229321	AC008269.1	0.427312	0.471103
ENSG00000272156	AC008280.3	0.374753	0.425137
ENSG00000268530	AC008403.2	-0.179554	0.806249
ENSG00000254295	AC008429.3	0.713222	0.508074
ENSG00000232220	AC008440.2	0.762839	0.0107237
ENSG00000233937	AC008443.1	0.313023	0.333307
ENSG00000247049	AC008443.2	-0.129495	0.876656
ENSG00000253660	AC008464.1	-1.04391	0.0126278
ENSG00000249476	AC008467.1	-0.107143	0.882521
ENSG00000271797	AC008494.3	-0.689218	0.145544
ENSG00000279232	AC008522.1	-1.71883	3.85612e-10
ENSG00000197332	AC008543.1	0.483326	0.597462
ENSG00000267379	AC008569.1	0.0781733	0.915877
ENSG00000267474	AC008569.2	-0.124275	0.923414
ENSG00000250362	AC008592.1	0.3756	0.714687
ENSG00000271737	AC008608.2	-0.192316	0.735042
ENSG00000248367	AC008610.1	0.513797	0.518496
ENSG00000275719	AC008622.2	0.110712	0.75124
ENSG00000269487	AC008635.1	-0.207616	0.787123
ENSG00000267633	AC008686.1	-0.186557	0.87055
ENSG00000253357	AC008708.1	-0.879635	0.198259
ENSG00000268743	AC008737.1	0.634224	0.484263
ENSG00000267650	AC008742.1	0.122575	0.934504
ENSG00000267984	AC008750.4	0.101534	0.879192
ENSG00000268112	AC008761.1	0.0786657	0.932192
ENSG00000268309	AC008764.3	1.1939	0.0908788
ENSG00000269399	AC008764.6	0.00116375	0.998953
ENSG00000279529	AC008764.8	0.0169282	0.981604
ENSG00000267274	AC008770.3	0.0915586	0.934991
ENSG00000250240	AC008840.1	-0.551674	0.100535
ENSG00000260751	AC008870.2	-0.240962	0.680978
ENSG00000271788	AC008875.1	0.94637	0.115178
ENSG00000269371	AC008878.4	0.0841891	0.900295
ENSG00000269243	AC008894.2	0.0361944	0.956332
ENSG00000248734	AC008906.1	0.853511	0.264398
ENSG00000272109	AC008906.2	-0.457279	0.604545
ENSG00000262211	AC008914.1	0.943854	0.0712103
ENSG00000260136	AC008915.2	0.266213	0.500404
ENSG00000271828	AC008937.3	0.369945	0.732608
ENSG00000267939	AC008946.1	0.576523	0.409377
ENSG00000176593	AC008969.1	0.310753	0.329055
ENSG00000271926	AC008972.1	-0.0622382	0.955304
ENSG00000269688	AC008982.2	0.786886	0.141116
ENSG00000196696	AC009022.1	0.432579	0.325202
ENSG00000274093	AC009032.1	0.0866072	0.934378
ENSG00000276931	AC009041.4	-0.107478	0.87401
ENSG00000261079	AC009053.2	-0.200825	0.85845
ENSG00000261783	AC009054.2	-0.215894	0.736197
ENSG00000247228	AC009060.1	1.10184	0.0610767
ENSG00000259780	AC009065.1	0.38565	0.599827
ENSG00000261123	AC009065.5	-1.30611	0.0378143
ENSG00000261240	AC009065.6	0.562055	0.587503
ENSG00000260304	AC009088.2	-0.406571	0.488343
ENSG00000260038	AC009090.1	0.0126016	0.99361
ENSG00000259807	AC009093.1	-0.55167	0.0496951
ENSG00000261513	AC009097.4	0.418628	0.507606
ENSG00000260927	AC009107.2	0.462618	0.357072
ENSG00000270020	AC009108.3	0.494546	0.558669
ENSG00000259972	AC009120.2	0.0487585	0.919596
ENSG00000247121	AC009126.1	-0.0998882	0.87055
ENSG00000261765	AC009127.1	0.253833	0.858031
ENSG00000259952	AC009133.2	-0.305791	0.38249
ENSG00000275857	AC009133.4	0.754313	0.387878
ENSG00000260495	AC009148.1	0.192739	0.822711
ENSG00000261476	AC009163.3	0.143851	0.928871
ENSG00000274220	AC009163.7	-0.37829	0.478586
ENSG00000261238	AC009166.1	0.943914	0.148688
ENSG00000223725	AC009226.1	0.0210055	0.988906
ENSG00000242628	AC009228.1	0.113576	0.936501
ENSG00000273305	AC009237.15	-0.968282	0.0808286
ENSG00000278472	AC009268.2	1.51326	0.0159991
ENSG00000259744	AC009269.4	-1.29933	0.0683551
ENSG00000267327	AC009271.1	0.51207	0.590079
ENSG00000273080	AC009309.1	0.640306	0.0808286
ENSG00000257176	AC009318.1	0.0849637	0.903023
ENSG00000273680	AC009318.2	-0.0408777	0.953771
ENSG00000274315	AC009318.3	-0.0570546	0.942139
ENSG00000236255	AC009404.1	-0.295985	0.464282
ENSG00000276261	AC009509.4	-0.526295	0.371492
ENSG00000256747	AC009511.2	0.290768	0.733138
ENSG00000272986	AC009570.1	-0.219955	0.806249
ENSG00000264578	AC009630.3	0.229329	0.714687
ENSG00000261460	AC009690.2	-0.00581689	0.996263
ENSG00000283667	AC009802.1	-0.767494	0.353071
ENSG00000251867	AC009812.1	0.257386	0.616106
ENSG00000263823	AC009831.1	-0.142396	0.784899
ENSG00000278840	AC009878.1	0.257599	0.813938
ENSG00000270277	AC009948.3	-0.268422	0.571397
ENSG00000270956	AC009948.4	0.0198989	0.976452
ENSG00000269068	AC009955.4	0.465742	0.616975
ENSG00000226266	AC009961.1	0.0179971	0.987325
ENSG00000259659	AC009996.1	-0.0329978	0.976452
ENSG00000261019	AC010132.4	-0.194191	0.835964
ENSG00000235726	AC010148.1	-1.01546	0.313103
ENSG00000261324	AC010168.2	0.0822164	0.890067
ENSG00000258101	AC010173.1	-0.265683	0.666054
ENSG00000257027	AC010186.3	0.318259	0.348283
ENSG00000271259	AC010201.1	0.923978	0.318071
ENSG00000271327	AC010201.2	0.0263293	0.976534
ENSG00000247311	AC010255.1	-0.39616	0.664551
ENSG00000248664	AC010273.1	0.271081	0.727253
ENSG00000268015	AC010320.2	0.757593	0.159824
ENSG00000276570	AC010327.5	0.211218	0.688949
ENSG00000277383	AC010331.1	0.706493	0.115578
ENSG00000268199	AC010335.1	0.545719	0.670816
ENSG00000214248	AC010336.1	0.641423	0.152237
ENSG00000260500	AC010336.2	0.038715	0.978194
ENSG00000268149	AC010336.4	0.102214	0.925646
ENSG00000269139	AC010336.5	0.929213	0.00713182
ENSG00000262732	AC010401.1	0.314226	0.771639
ENSG00000268945	AC010422.2	-1.34172	0.134448
ENSG00000251257	AC010457.1	0.939001	0.106849
ENSG00000269815	AC010463.3	0.216408	0.826205
ENSG00000268746	AC010519.1	-1.18233	0.15482
ENSG00000270165	AC010530.1	1.1472	0.209497
ENSG00000226180	AC010536.1	-0.835779	0.0943849
ENSG00000275734	AC010538.1	-0.323584	0.511999
ENSG00000260755	AC010542.2	0.229177	0.831725
ENSG00000261519	AC010542.4	0.119536	0.913121
ENSG00000273189	AC010619.2	0.0687907	0.962479
ENSG00000283103	AC010642.2	0.202202	0.457326
ENSG00000277369	AC010654.1	0.125202	0.87055
ENSG00000270574	AC010680.2	-0.419046	0.319938
ENSG00000271011	AC010680.3	-0.320068	0.605008
ENSG00000271141	AC010680.4	0.343336	0.702865
ENSG00000270933	AC010719.1	0.403525	0.786921
ENSG00000261379	AC010735.1	0.910195	0.00117241
ENSG00000272622	AC010735.2	1.08198	8.97698e-12
ENSG00000264577	AC010761.1	0.263446	0.539238
ENSG00000265840	AC010761.5	-0.273287	0.801537
ENSG00000267774	AC010776.2	1.70624	0.0259921
ENSG00000259287	AC010809.1	0.0198058	0.976645
ENSG00000259408	AC010809.2	-0.0320122	0.959047
ENSG00000253854	AC010834.3	0.592174	0.611568
ENSG00000234936	AC010883.1	0.417017	0.609036
ENSG00000237798	AC010894.4	0.223081	0.85893
ENSG00000272702	AC010913.1	-0.149705	0.867919
ENSG00000248540	AC010931.2	-1.37803	0.0251983
ENSG00000269973	AC010969.2	0.288537	0.342172
ENSG00000244151	AC010973.2	0.228115	0.640409
ENSG00000231731	AC010976.1	0.325812	0.800755
ENSG00000272789	AC010976.2	1.14409	0.0238448
ENSG00000235522	AC010978.1	0.310189	0.580213
ENSG00000272692	AC010997.4	-0.224099	0.855053
ENSG00000273248	AC010997.5	0.0355943	0.980896
ENSG00000271795	AC011337.1	-0.249678	0.747931
ENSG00000248362	AC011352.1	0.350907	0.748904
ENSG00000254192	AC011365.2	-0.574074	0.605996
ENSG00000272112	AC011374.2	-0.0593894	0.938971
ENSG00000249593	AC011405.1	0.146364	0.863789
ENSG00000283897	AC011416.3	-0.486889	0.634485
ENSG00000269246	AC011445.2	0.476617	0.693495
ENSG00000267512	AC011446.1	0.693663	0.40602
ENSG00000267598	AC011446.2	-0.66517	0.0476626
ENSG00000267383	AC011447.3	0.321762	0.634337
ENSG00000197813	AC011450.1	-0.449846	0.268464
ENSG00000283108	AC011451.3	-0.0746168	0.942909
ENSG00000267197	AC011461.1	-0.377456	0.603758
ENSG00000277744	AC011462.4	-0.361525	0.69531
ENSG00000268583	AC011466.1	-0.237128	0.753697
ENSG00000260160	AC011468.1	0.315325	0.493343
ENSG00000275055	AC011468.5	-0.00521086	0.99671
ENSG00000267082	AC011472.1	1.02374	0.119293
ENSG00000267174	AC011472.2	0.945203	0.347036
ENSG00000273733	AC011472.4	0.267176	0.732592
ENSG00000267481	AC011477.2	-0.0289073	0.965296
ENSG00000267114	AC011481.1	-0.851662	0.370969
ENSG00000267282	AC011481.2	0.675783	0.197697
ENSG00000204850	AC011484.1	-1.07636	0.134719
ENSG00000267011	AC011498.1	-0.374774	0.727414
ENSG00000267030	AC011498.2	-0.425215	0.75124
ENSG00000267769	AC011498.6	-0.052318	0.922783
ENSG00000269289	AC011503.1	4.59089	3.87923e-77
ENSG00000269397	AC011503.2	-0.252269	0.760986
ENSG00000269652	AC011510.1	-0.534687	0.335185
ENSG00000267105	AC011511.3	1.05521	0.166127
ENSG00000257890	AC011595.2	0.0569209	0.962373
ENSG00000254362	AC011726.3	0.647707	0.504495
ENSG00000266495	AC011731.1	0.123449	0.935154
ENSG00000231083	AC011747.1	0.0796848	0.957332
ENSG00000268573	AC011815.1	-0.225497	0.653942
ENSG00000279145	AC011912.1	0.629388	0.137961
ENSG00000275638	AC011939.3	0.225295	0.883058
ENSG00000261542	AC011978.2	0.31	0.605704
ENSG00000279277	AC012020.1	0.887449	0.393749
ENSG00000269976	AC012065.3	1.01919	0.150945
ENSG00000271936	AC012073.1	-0.402407	0.344228
ENSG00000260350	AC012173.1	0.296927	0.642702
ENSG00000261114	AC012181.1	-0.57843	0.272171
ENSG00000261270	AC012181.2	0.0881575	0.898496
ENSG00000260111	AC012184.1	-0.360886	0.498859
ENSG00000272667	AC012306.2	0.0294249	0.95968
ENSG00000268049	AC012313.2	0.317473	0.339917
ENSG00000268230	AC012313.3	0.264388	0.698695
ENSG00000268912	AC012313.5	-0.0932435	0.85298
ENSG00000273901	AC012313.9	-0.315511	0.731244
ENSG00000203327	AC012358.1	-0.685462	0.298984
ENSG00000240401	AC012358.3	0.148844	0.854763
ENSG00000272861	AC012360.2	-0.386034	0.628534
ENSG00000277135	AC012409.3	-0.638964	0.172847
ENSG00000260409	AC012414.5	0.405414	0.730576
ENSG00000228251	AC012442.1	-0.564041	0.45105
ENSG00000243389	AC012442.2	0.209082	0.846362
ENSG00000271976	AC012467.2	0.0563528	0.892091
ENSG00000231092	AC012513.1	-1.47879	0.140058
ENSG00000260597	AC012531.1	0.229576	0.605575
ENSG00000271843	AC012557.1	-0.260876	0.812774
ENSG00000253406	AC012613.2	0.162387	0.887126
ENSG00000261526	AC012615.1	-0.292265	0.470691
ENSG00000267007	AC012615.2	0.450061	0.70468
ENSG00000267125	AC012615.3	-0.363933	0.782024
ENSG00000267244	AC012615.6	0.426831	0.684724
ENSG00000267053	AC012617.1	0.549656	0.499092
ENSG00000248968	AC012640.1	-1.73132	0.0596049
ENSG00000271980	AC012640.4	0.293681	0.678505
ENSG00000274719	AC012653.2	-0.964817	0.176442
ENSG00000272148	AC013403.2	0.187877	0.785305
ENSG00000258425	AC013451.1	0.178819	0.706494
ENSG00000258976	AC013451.2	-0.498159	0.363984
ENSG00000273240	AC013468.1	-0.247277	0.85809
ENSG00000272056	AC013472.3	-0.0503762	0.967207
ENSG00000259345	AC013652.1	0.798007	0.000142823
ENSG00000270557	AC013731.1	-0.465931	0.700564
ENSG00000264558	AC015674.1	0.443268	0.411804
ENSG00000232386	AC015712.1	-0.0473813	0.971238
ENSG00000278456	AC015712.7	0.678091	0.481417
ENSG00000270091	AC015726.1	0.410477	0.424318
ENSG00000267543	AC015802.3	-1.51605	0.12464
ENSG00000267546	AC015802.4	0.239816	0.807645
ENSG00000264112	AC015813.1	0.193219	0.605657
ENSG00000278600	AC015871.3	-0.0584244	0.918183
ENSG00000249406	AC015909.1	-0.231333	0.649843
ENSG00000263176	AC015909.4	-0.293777	0.723359
ENSG00000262112	AC015912.1	0.889873	0.359655
ENSG00000274213	AC015912.3	-0.616924	0.441631
ENSG00000265254	AC015917.2	0.589058	0.43964
ENSG00000276855	AC015922.4	0.306164	0.458305
ENSG00000093100	AC016026.1	-0.210157	0.847883
ENSG00000225335	AC016027.1	-0.342949	0.533323
ENSG00000227540	AC016394.1	-0.297311	0.634337
ENSG00000272599	AC016394.2	-0.169861	0.819001
ENSG00000272384	AC016405.3	0.551375	0.524205
ENSG00000268670	AC016586.1	-0.248689	0.659391
ENSG00000267124	AC016588.1	0.155368	0.830505
ENSG00000282393	AC016588.2	-0.194587	0.837069
ENSG00000267682	AC016590.2	0.196123	0.849864
ENSG00000276846	AC016590.3	-0.193047	0.846738
ENSG00000228925	AC016722.2	1.12431	0.0100231
ENSG00000271151	AC016737.1	0.246985	0.84819
ENSG00000223947	AC016738.1	-0.0111524	0.99671
ENSG00000271204	AC016831.5	-0.049838	0.975452
ENSG00000233223	AC016876.1	0.400392	0.180977
ENSG00000264772	AC016876.2	-0.455121	0.586526
ENSG00000276384	AC016876.3	-0.229518	0.762896
ENSG00000271930	AC016877.3	0.363367	0.531384
ENSG00000250934	AC016924.1	1.79967	0.00938837
ENSG00000230732	AC016949.1	0.170222	0.831447
ENSG00000276136	AC016957.2	0.790352	0.242999
ENSG00000229915	AC016999.1	-0.708344	0.248657
ENSG00000271709	AC017033.1	-0.307137	0.692037
ENSG00000273064	AC017083.1	-0.338296	0.707102
ENSG00000273275	AC017083.2	0.721657	0.195162
ENSG00000259985	AC017100.1	0.10894	0.900782
ENSG00000227227	AC017101.1	0.710254	0.349728
ENSG00000224376	AC017104.1	0.223848	0.727309
ENSG00000261684	AC018362.1	-0.326112	0.738704
ENSG00000241679	AC018450.1	2.1388	0.00702704
ENSG00000234520	AC018464.1	-1.00575	0.219069
ENSG00000260465	AC018557.1	0.530068	0.330076
ENSG00000271344	AC018638.6	-0.206179	0.763984
ENSG00000271553	AC018638.7	-0.0660266	0.942334
ENSG00000273014	AC018645.2	0.14032	0.774533
ENSG00000273306	AC018690.1	0.327823	0.630016
ENSG00000275393	AC018695.6	-0.431465	0.642739
ENSG00000285190	AC018754.1	0.281223	0.795563
ENSG00000267062	AC018761.2	0.297784	0.477487
ENSG00000268047	AC018766.1	-0.0993173	0.920221
ENSG00000269982	AC018809.2	0.00123728	0.998997
ENSG00000235978	AC018816.1	-0.168571	0.865202
ENSG00000274765	AC018926.1	-0.0394245	0.978573
ENSG00000276533	AC018926.2	-1.25907	0.136009
ENSG00000277548	AC018926.3	0.1584	0.883789
ENSG00000214559	AC019077.1	0.509066	0.615627
ENSG00000213963	AC019080.1	0.574273	0.0214698
ENSG00000272777	AC019131.2	0.695779	0.0773575
ENSG00000269210	AC019171.1	0.528347	0.246443
ENSG00000234584	AC019186.1	-0.00150963	0.999225
ENSG00000272784	AC019193.2	0.545527	0.557044
ENSG00000264666	AC020558.1	1.24319	0.00239639
ENSG00000273123	AC020634.1	0.919296	0.101679
ENSG00000250379	AC020659.2	-0.921036	0.399946
ENSG00000251161	AC020661.1	-0.619593	0.173381
ENSG00000275441	AC020765.2	-0.637349	0.377999
ENSG00000249180	AC020900.1	0.814148	0.0636284
ENSG00000268518	AC020909.2	-0.269921	0.854425
ENSG00000268854	AC020909.3	0.507911	0.2552
ENSG00000274104	AC020910.4	0.543017	0.236052
ENSG00000268056	AC020913.1	0.0486473	0.962766
ENSG00000269480	AC020913.2	0.00973661	0.99671
ENSG00000267216	AC020915.1	-0.49775	0.291169
ENSG00000268201	AC020915.2	-0.000818264	0.999432
ENSG00000267260	AC020928.2	0.244227	0.810154
ENSG00000267387	AC020931.1	0.565247	0.399468
ENSG00000267735	AC020934.2	0.518678	0.397152
ENSG00000262160	AC020978.5	0.291342	0.76733
ENSG00000263276	AC020978.7	-0.653414	0.446924
ENSG00000261338	AC021016.2	0.151417	0.67767
ENSG00000273361	AC021016.3	0.0720918	0.941508
ENSG00000230551	AC021078.1	0.176646	0.461338
ENSG00000260774	AC021087.3	0.12043	0.917231
ENSG00000272661	AC021097.1	0.236519	0.599405
ENSG00000273007	AC021205.3	-0.912643	0.439387
ENSG00000267313	AC021504.1	-0.0562355	0.968584
ENSG00000259407	AC021739.2	0.695823	0.18185
ENSG00000259544	AC021739.4	0.46407	0.583928
ENSG00000273674	AC021752.1	-0.689931	0.557334
ENSG00000272800	AC021851.1	0.864284	0.21666
ENSG00000206567	AC022007.1	0.39073	0.322399
ENSG00000278733	AC022079.2	1.659	0.0726078
ENSG00000180458	AC022148.1	0.526076	0.159633
ENSG00000268093	AC022154.1	0.14305	0.914884
ENSG00000233849	AC022201.2	-0.181354	0.883595
ENSG00000263786	AC022211.1	-0.224563	0.798958
ENSG00000265800	AC022211.3	-0.729162	0.538125
ENSG00000253736	AC022217.3	0.0476432	0.967834
ENSG00000269954	AC022239.1	2.78951	0.00113703
ENSG00000275580	AC022306.2	-0.219575	0.801537
ENSG00000247934	AC022364.1	-0.167653	0.6992
ENSG00000269886	AC022382.1	-0.153068	0.879105
ENSG00000272140	AC022400.5	0.50746	0.457735
ENSG00000274654	AC022467.1	0.253473	0.742338
ENSG00000255750	AC022509.1	-0.502967	0.605008
ENSG00000256894	AC022509.3	-1.05455	0.000765177
ENSG00000259767	AC022558.1	-0.605038	0.592848
ENSG00000273747	AC022558.3	-0.801813	0.291347
ENSG00000268873	AC022601.1	0.93351	0.162668
ENSG00000267940	AC022762.2	-0.719919	0.336302
ENSG00000254340	AC022784.7	1.28785	0.0849502
ENSG00000253636	AC022893.1	0.0744006	0.920577
ENSG00000253608	AC022915.2	-0.69789	0.38775
ENSG00000266947	AC022916.1	-0.235126	0.713811
ENSG00000267601	AC022966.1	0.438906	0.0221894
ENSG00000274849	AC023043.4	0.231968	0.796138
ENSG00000248115	AC023154.1	5.48756	5.90434e-32
ENSG00000276900	AC023157.3	-0.242469	0.664723
ENSG00000257379	AC023509.1	-0.298217	0.512166
ENSG00000257550	AC023509.2	-0.115843	0.908569
ENSG00000270175	AC023509.4	0.166871	0.763898
ENSG00000255621	AC023790.2	-1.19775	0.206797
ENSG00000248265	AC023794.1	0.385084	0.514462
ENSG00000256482	AC023796.2	0.2463	0.83103
ENSG00000260052	AC023813.3	-0.879697	0.439151
ENSG00000278434	AC023830.3	0.627285	0.593393
ENSG00000259327	AC023906.3	0.280625	0.723359
ENSG00000259709	AC023906.4	0.240543	0.857008
ENSG00000259712	AC023906.5	0.911615	0.00917747
ENSG00000261136	AC023908.3	0.765095	0.071172
ENSG00000267904	AC024075.1	0.0859979	0.852258
ENSG00000269044	AC024075.2	0.214819	0.458548
ENSG00000248515	AC024230.1	-1.41976	0.0491162
ENSG00000260579	AC024270.3	-0.622938	0.199824
ENSG00000273771	AC024337.2	-0.3063	0.568933
ENSG00000273308	AC024560.3	1.69791	0.0627069
ENSG00000267277	AC024575.1	0.738626	0.140362
ENSG00000274021	AC024909.2	-0.406437	0.57498
ENSG00000272656	AC024933.1	0.868954	0.176719
ENSG00000257496	AC025031.1	-0.914627	0.0480987
ENSG00000275481	AC025031.4	0.301066	0.807633
ENSG00000258302	AC025034.1	-0.491687	0.714294
ENSG00000267095	AC025048.1	0.180466	0.757526
ENSG00000267248	AC025048.2	0.193458	0.616436
ENSG00000258554	AC025162.1	-0.283297	0.794011
ENSG00000224713	AC025165.1	0.38446	0.518496
ENSG00000257342	AC025165.2	0.429615	0.290434
ENSG00000269903	AC025165.4	-0.24843	0.828574
ENSG00000270039	AC025165.5	0.00210758	0.998492
ENSG00000251131	AC025171.3	0.467417	0.604545
ENSG00000272144	AC025171.4	0.0486054	0.957687
ENSG00000272416	AC025175.1	-0.42481	0.590079
ENSG00000250764	AC025178.1	0.0697323	0.964148
ENSG00000225407	AC025188.1	-0.830423	0.0227081
ENSG00000257386	AC025257.1	1.65816	0.0220581
ENSG00000257663	AC025259.1	0.0455085	0.948435
ENSG00000257681	AC025265.1	-0.316004	0.707945
ENSG00000260859	AC025280.1	2.81308	2.72837e-05
ENSG00000257181	AC025423.4	1.31743	0.00296434
ENSG00000250234	AC025754.1	-0.230475	0.68604
ENSG00000250280	AC026124.1	0.474444	0.477487
ENSG00000254485	AC026191.1	0.421153	0.439105
ENSG00000233912	AC026202.2	0.414143	0.720213
ENSG00000268509	AC026202.3	0.318972	0.629741
ENSG00000268129	AC026304.1	-0.523249	0.389931
ENSG00000228561	AC026355.1	-0.159191	0.883592
ENSG00000274964	AC026356.1	-0.358138	0.346034
ENSG00000276115	AC026356.2	-0.203813	0.72879
ENSG00000256028	AC026362.1	0.0480804	0.932742
ENSG00000270482	AC026367.1	0.113194	0.934034
ENSG00000275409	AC026367.2	-0.250638	0.849989
ENSG00000275759	AC026367.3	0.449199	0.49929
ENSG00000277840	AC026368.1	0.417296	0.728656
ENSG00000275088	AC026469.1	0.741216	0.450276
ENSG00000260267	AC026471.1	-0.147033	0.647819
ENSG00000260740	AC026471.3	-0.53668	0.626362
ENSG00000261474	AC026471.4	0.274987	0.567023
ENSG00000270021	AC026691.1	-0.20727	0.738691
ENSG00000271781	AC026740.1	-1.0514	0.26816
ENSG00000272103	AC026741.1	0.107656	0.92364
ENSG00000260545	AC026771.1	1.27081	0.2005
ENSG00000260366	AC026803.1	0.357187	0.750436
ENSG00000253688	AC026904.3	0.408802	0.646882
ENSG00000263171	AC026954.3	0.304233	0.807116
ENSG00000272375	AC026979.3	-0.139059	0.855072
ENSG00000270127	AC027020.2	0.313017	0.581388
ENSG00000267787	AC027097.2	0.688931	0.0204897
ENSG00000253671	AC027117.1	2.5516	2.77149e-05
ENSG00000272576	AC027271.1	1.11545	0.237982
ENSG00000257894	AC027288.3	4.16437	9.12294e-105
ENSG00000256152	AC027290.1	0.755921	0.269819
ENSG00000267317	AC027307.2	0.188389	0.470557
ENSG00000268798	AC027307.3	0.0407255	0.948435
ENSG00000267484	AC027319.1	-0.405411	0.394994
ENSG00000260368	AC027373.1	-0.810193	0.295753
ENSG00000278107	AC027575.2	0.490473	0.270394
ENSG00000260005	AC027601.1	0.191915	0.835964
ENSG00000276101	AC027601.4	0.17591	0.707948
ENSG00000248936	AC027607.1	1.21966	0.140058
ENSG00000272831	AC027644.3	-0.10217	0.803989
ENSG00000259945	AC027682.2	-1.09822	0.098626
ENSG00000260894	AC027682.3	-0.450821	0.550679
ENSG00000261396	AC027682.5	0.0576231	0.943127
ENSG00000276075	AC027682.6	-0.110143	0.862785
ENSG00000260588	AC027702.1	-0.0354176	0.982756
ENSG00000204584	AC027801.1	0.578295	0.608914
ENSG00000274340	AC032011.1	-0.0381069	0.972097
ENSG00000257553	AC034102.4	-0.142127	0.819001
ENSG00000258317	AC034102.6	0.536147	0.366657
ENSG00000258345	AC034102.7	-0.232164	0.876812
ENSG00000272263	AC034198.2	0.0520254	0.961994
ENSG00000271918	AC034236.2	-0.108013	0.851622
ENSG00000249328	AC036214.1	-1.77911	0.00426468
ENSG00000272518	AC036214.2	-0.125972	0.890349
ENSG00000253200	AC037459.3	-0.253339	0.416247
ENSG00000254230	AC037459.4	0.240135	0.631824
ENSG00000278493	AC039056.2	0.14219	0.926743
ENSG00000262691	AC040160.1	-0.189825	0.764992
ENSG00000263126	AC040162.3	-0.65091	0.483992
ENSG00000274677	AC040169.3	0.0832354	0.956314
ENSG00000253347	AC040934.1	0.324802	0.719156
ENSG00000262089	AC040977.1	0.00521999	0.99671
ENSG00000258122	AC044802.2	0.202952	0.838027
ENSG00000272256	AC044849.1	1.11157	0.00772429
ENSG00000272707	AC046143.2	0.567901	0.547583
ENSG00000275180	AC048341.2	0.204943	0.667954
ENSG00000276278	AC048382.6	0.302662	0.635846
ENSG00000259539	AC051619.6	0.17685	0.819117
ENSG00000260035	AC051619.8	-0.713553	0.543449
ENSG00000234638	AC053503.4	-2.93914	1.23362e-12
ENSG00000268603	AC053503.5	-0.525556	0.267109
ENSG00000256973	AC053513.1	0.381285	0.60395
ENSG00000273375	AC055764.2	0.422833	0.723742
ENSG00000267547	AC060766.4	0.000835873	0.998997
ENSG00000267711	AC060766.6	0.273367	0.732592
ENSG00000267745	AC060766.7	0.000433458	0.999432
ENSG00000267002	AC060780.1	0.0713102	0.877403
ENSG00000278344	AC063943.1	0.416272	0.72879
ENSG00000272024	AC064807.4	0.503079	0.63185
ENSG00000273456	AC064836.3	-0.576748	0.197297
ENSG00000225649	AC064875.1	-0.391256	0.75292
ENSG00000272631	AC067750.1	0.0897204	0.834031
ENSG00000272338	AC067838.1	0.285156	0.548107
ENSG00000267632	AC067852.3	0.0391721	0.961529
ENSG00000266111	AC068025.2	-0.207097	0.858031
ENSG00000262879	AC068152.1	0.188838	0.26334
ENSG00000283341	AC068205.2	0.195648	0.714924
ENSG00000260274	AC068338.2	-0.297503	0.498695
ENSG00000275645	AC068338.3	0.541326	0.472381
ENSG00000255498	AC068385.1	0.327871	0.753374
ENSG00000229512	AC068580.1	-0.660785	0.321123
ENSG00000269921	AC068620.1	0.391655	0.70941
ENSG00000282556	AC068733.3	0.322403	0.336201
ENSG00000269938	AC068790.2	-0.201772	0.856562
ENSG00000269997	AC068790.3	-0.47047	0.498091
ENSG00000270048	AC068790.4	-0.408378	0.632942
ENSG00000270061	AC068790.5	-0.314963	0.739794
ENSG00000270095	AC068790.6	0.361114	0.763019
ENSG00000270130	AC068790.7	-0.465476	0.505978
ENSG00000275389	AC068790.9	-0.467006	0.555332
ENSG00000275769	AC068792.1	-0.0799633	0.946584
ENSG00000259661	AC068831.4	0.135815	0.924103
ENSG00000278514	AC068831.6	-1.31844	0.180808
ENSG00000260619	AC068870.1	-1.0927	0.282816
ENSG00000277782	AC068870.2	-0.0122041	0.98764
ENSG00000233581	AC069155.1	-0.425099	0.286211
ENSG00000255046	AC069185.1	0.125276	0.842304
ENSG00000223711	AC069213.1	-0.908838	0.294865
ENSG00000273374	AC069222.1	-0.728463	0.471704
ENSG00000255946	AC069234.1	-0.279706	0.842416
ENSG00000256364	AC069234.2	0.108277	0.883337
ENSG00000256569	AC069234.3	-0.761406	0.449525
ENSG00000276188	AC069234.4	0.224813	0.869945
ENSG00000277423	AC069234.5	0.317752	0.622739
ENSG00000254559	AC069287.2	-0.153575	0.882945
ENSG00000269949	AC069307.1	-0.414278	0.557117
ENSG00000255856	AC069503.1	0.0902697	0.929252
ENSG00000237870	AC073130.1	-1.11612	0.0972474
ENSG00000259589	AC073167.1	0.155044	0.921591
ENSG00000271855	AC073195.1	0.00907985	0.99569
ENSG00000237126	AC073254.1	0.879813	0.371911
ENSG00000217702	AC073263.1	0.888237	0.179809
ENSG00000226087	AC073283.2	-0.998119	0.250251
ENSG00000242578	AC073288.2	-1.63902	0.052842
ENSG00000217455	AC073316.1	-0.139283	0.86495
ENSG00000237773	AC073332.1	-0.424818	0.400724
ENSG00000228010	AC073343.2	0.292638	0.735385
ENSG00000225213	AC073367.1	-0.248186	0.84694
ENSG00000268584	AC073389.1	-0.833794	0.245594
ENSG00000272791	AC073389.3	-0.949547	0.249423
ENSG00000261096	AC073476.3	0.224044	0.806249
ENSG00000257509	AC073487.1	0.0374593	0.969103
ENSG00000278834	AC073508.3	-0.284544	0.372198
ENSG00000277130	AC073569.3	-0.827832	0.476596
ENSG00000274227	AC073575.2	-1.91543	0.0429355
ENSG00000242798	AC073842.2	-1.04829	0.0881898
ENSG00000251679	AC073848.1	-1.59362	0.0335402
ENSG00000257359	AC073863.1	-1.14145	0.0773019
ENSG00000273073	AC073869.3	-0.597247	0.639963
ENSG00000256299	AC073912.2	0.550187	0.466672
ENSG00000257607	AC073957.2	-0.0515265	0.976534
ENSG00000273151	AC073957.3	0.251056	0.76266
ENSG00000272368	AC074032.1	0.116169	0.880967
ENSG00000267886	AC074135.1	-0.249155	0.731474
ENSG00000276071	AC074138.1	-0.413562	0.56571
ENSG00000248206	AC074194.1	0.0630132	0.956454
ENSG00000259605	AC074212.1	0.267042	0.59641
ENSG00000235872	AC078777.1	-0.963086	0.306768
ENSG00000269984	AC078795.1	1.25237	0.0698453
ENSG00000270096	AC078795.2	-0.150651	0.884125
ENSG00000269889	AC078802.1	0.787359	0.218195
ENSG00000273329	AC078846.1	-0.00239	0.998086
ENSG00000248187	AC078850.1	1.58698	1.53391e-06
ENSG00000271579	AC078880.3	-1.61891	0.00779113
ENSG00000226963	AC078883.2	0.536513	0.472183
ENSG00000259460	AC078909.1	-0.270005	0.742893
ENSG00000258355	AC079174.1	-0.808408	0.429571
ENSG00000277715	AC079174.2	0.0142716	0.989043
ENSG00000249258	AC079193.2	-0.826354	0.246443
ENSG00000278981	AC079298.1	4.14504	3.37359e-08
ENSG00000280241	AC079298.3	3.89234	2.08941e-24
ENSG00000222043	AC079305.1	0.622102	0.0544735
ENSG00000229337	AC079305.3	0.9081	0.0312912
ENSG00000261187	AC079322.1	0.84117	0.309693
ENSG00000259627	AC079328.2	0.0566483	0.932868
ENSG00000254680	AC079329.1	-0.692042	0.327212
ENSG00000265222	AC079336.2	-1.07464	0.288292
ENSG00000231903	AC079354.3	0.634699	0.610133
ENSG00000257545	AC079385.1	-0.356793	0.777415
ENSG00000257711	AC079385.2	-0.842427	0.325938
ENSG00000257918	AC079385.3	-0.754729	0.450574
ENSG00000276007	AC079414.3	0.456809	0.390249
ENSG00000232633	AC079465.1	1.60328	0.0151462
ENSG00000257225	AC079601.1	-0.227348	0.710846
ENSG00000270659	AC079610.2	1.032	0.00890704
ENSG00000274943	AC079684.1	0.00706498	0.996905
ENSG00000232581	AC079742.1	-0.235704	0.79865
ENSG00000272646	AC079766.1	-0.0949472	0.934378
ENSG00000284707	AC079781.5	-0.0380424	0.972014
ENSG00000233230	AC079807.1	0.0147647	0.989205
ENSG00000272944	AC079834.2	0.152575	0.849714
ENSG00000249207	AC079921.1	0.218447	0.773988
ENSG00000249685	AC079921.2	-0.89704	0.0100622
ENSG00000256001	AC079949.1	-0.0853183	0.934068
ENSG00000278266	AC079949.2	-0.293087	0.682008
ENSG00000240207	AC080013.1	0.612103	0.0739541
ENSG00000274565	AC080038.1	0.0450831	0.932752
ENSG00000249609	AC080188.1	-0.845411	0.459541
ENSG00000203644	AC083799.1	-0.0485838	0.930748
ENSG00000245651	AC083805.1	-0.214012	0.868859
ENSG00000273805	AC083805.3	0.542089	0.528851
ENSG00000272941	AC083862.2	0.150401	0.700357
ENSG00000273391	AC083880.1	-0.245102	0.728531
ENSG00000272293	AC083964.1	-0.676473	0.0883563
ENSG00000254337	AC083967.1	-0.872984	0.0172974
ENSG00000274292	AC084018.2	0.0736304	0.936171
ENSG00000253356	AC084024.3	0.455223	0.579524
ENSG00000272990	AC084036.1	0.604043	0.0909495
ENSG00000256006	AC084117.1	0.928713	0.132652
ENSG00000254578	AC084125.1	0.222035	0.867728
ENSG00000255182	AC084125.2	-0.0400049	0.966259
ENSG00000265393	AC084125.4	0.277859	0.582541
ENSG00000257202	AC084398.2	0.602413	0.606796
ENSG00000236377	AC084809.2	-0.287334	0.728728
ENSG00000274105	AC084824.3	-0.327831	0.728728
ENSG00000275854	AC084824.4	0.401201	0.501453
ENSG00000276148	AC084824.5	-0.519227	0.629536
ENSG00000266677	AC087164.1	0.61564	0.0912772
ENSG00000263244	AC087190.3	-0.149951	0.349741
ENSG00000254577	AC087276.1	-0.121732	0.932186
ENSG00000283415	AC087280.2	-0.191708	0.843697
ENSG00000259375	AC087286.3	0.0528903	0.946699
ENSG00000259453	AC087286.4	1.17662	0.226643
ENSG00000267342	AC087289.2	0.168007	0.899039
ENSG00000267801	AC087289.5	-0.331255	0.640146
ENSG00000263165	AC087292.1	0.110883	0.943137
ENSG00000262003	AC087392.1	-0.409129	0.325202
ENSG00000262434	AC087392.4	-0.0544872	0.942334
ENSG00000277491	AC087392.5	-0.257275	0.865202
ENSG00000263986	AC087393.2	0.214971	0.760754
ENSG00000259275	AC087477.2	0.103848	0.805469
ENSG00000259347	AC087482.1	-0.317363	0.799109
ENSG00000271851	AC087501.4	-0.0221809	0.967959
ENSG00000244953	AC087521.1	1.11258	0.19567
ENSG00000254409	AC087521.3	0.0796958	0.941627
ENSG00000283375	AC087521.4	0.809906	0.281991
ENSG00000285367	AC087564.1	0.295073	0.555554
ENSG00000272092	AC087623.3	0.60862	0.331248
ENSG00000272159	AC087623.4	-0.153005	0.880278
ENSG00000258773	AC087636.1	0.200382	0.799109
ENSG00000267737	AC087645.2	0.249975	0.785386
ENSG00000254288	AC087672.2	-0.115773	0.920734
ENSG00000276174	AC087683.2	-0.00460217	0.998492
ENSG00000262580	AC087741.1	0.287396	0.511574
ENSG00000259278	AC087878.1	0.722109	0.142128
ENSG00000257732	AC089983.1	-0.670424	0.0204032
ENSG00000257286	AC089999.1	0.115385	0.941875
ENSG00000224239	AC090044.1	0.297569	0.778034
ENSG00000269951	AC090181.2	-0.137035	0.900174
ENSG00000253227	AC090192.2	-0.0281083	0.965833
ENSG00000253106	AC090198.1	0.204651	0.626964
ENSG00000247134	AC090204.1	0.320351	0.739411
ENSG00000267397	AC090229.1	0.896278	0.112616
ENSG00000274776	AC090241.3	1.18202	0.195778
ENSG00000260988	AC090260.1	0.941288	0.359812
ENSG00000267279	AC090409.1	-0.629127	0.0291831
ENSG00000267316	AC090409.2	-0.51152	0.618444
ENSG00000272910	AC090425.2	0.548371	0.514
ENSG00000278769	AC090510.3	0.531929	0.652578
ENSG00000259353	AC090515.4	0.0894103	0.913817
ENSG00000259402	AC090515.5	0.330716	0.763984
ENSG00000274667	AC090517.2	-0.109791	0.938623
ENSG00000253553	AC090568.2	-0.677747	0.401312
ENSG00000270060	AC090589.3	0.0265923	0.980418
ENSG00000259322	AC090607.1	-0.53944	0.677546
ENSG00000236838	AC090617.2	-0.308315	0.745094
ENSG00000262533	AC090617.3	-0.105434	0.890349
ENSG00000254165	AC090739.1	-0.440672	0.46827
ENSG00000265750	AC090772.3	1.48472	0.103356
ENSG00000259363	AC090825.1	-0.0536779	0.913817
ENSG00000261821	AC090826.1	-0.0651219	0.955574
ENSG00000259755	AC090907.2	0.235359	0.869016
ENSG00000272498	AC090948.2	1.24987	0.100692
ENSG00000274528	AC090970.3	-0.283428	0.658272
ENSG00000254665	AC091053.1	-0.239928	0.701521
ENSG00000230532	AC091133.1	-0.176887	0.755067
ENSG00000267160	AC091152.2	-0.242156	0.684724
ENSG00000275345	AC091167.5	-0.897569	0.24157
ENSG00000250186	AC091180.3	-0.0503307	0.942999
ENSG00000253123	AC091182.1	-1.67901	0.0767896
ENSG00000253746	AC091182.2	-1.67232	4.66819e-06
ENSG00000253476	AC091185.1	0.0435663	0.966277
ENSG00000273702	AC091271.1	-0.561248	0.292173
ENSG00000254343	AC091563.1	1.08322	4.49859e-09
ENSG00000254400	AC091564.2	-0.309572	0.467613
ENSG00000255410	AC091564.5	-0.759153	0.457653
ENSG00000255680	AC091564.6	-0.299971	0.562967
ENSG00000285338	AC091564.7	-0.186361	0.802123
ENSG00000266283	AC091588.3	-0.615797	0.485081
ENSG00000273219	AC091736.1	-0.0923359	0.949444
ENSG00000236393	AC091806.1	-0.0978684	0.871691
ENSG00000275765	AC091982.3	0.0704481	0.898136
ENSG00000283849	AC092053.2	0.285235	0.786535
ENSG00000284669	AC092053.3	-0.120229	0.935154
ENSG00000267458	AC092069.1	0.147976	0.731556
ENSG00000275367	AC092111.1	-0.735808	0.0246856
ENSG00000276417	AC092111.2	-0.295447	0.809245
ENSG00000261602	AC092115.2	0.512275	0.680029
ENSG00000276791	AC092117.1	-0.0670593	0.92764
ENSG00000276166	AC092118.2	-0.136713	0.890349
ENSG00000274460	AC092119.2	0.111174	0.860829
ENSG00000261118	AC092123.1	0.0615186	0.956454
ENSG00000270124	AC092127.2	-1.59722	0.00025169
ENSG00000260621	AC092140.1	0.865278	0.448875
ENSG00000259006	AC092143.2	-0.304041	0.7393
ENSG00000267048	AC092143.3	-0.175131	0.82559
ENSG00000226622	AC092155.1	1.01166	0.0210219
ENSG00000226965	AC092167.1	-0.106837	0.905444
ENSG00000230733	AC092171.2	0.13187	0.858421
ENSG00000272953	AC092171.4	-0.578734	0.34287
ENSG00000268362	AC092279.1	0.264248	0.437175
ENSG00000284428	AC092329.4	0.534996	0.165912
ENSG00000261512	AC092368.3	-0.611572	0.0792849
ENSG00000260306	AC092375.2	0.42955	0.686366
ENSG00000245768	AC092378.1	0.533867	0.371851
ENSG00000273179	AC092535.4	-1.03347	0.229659
ENSG00000272885	AC092574.1	0.64508	0.396387
ENSG00000223523	AC092598.1	-1.44298	0.115417
ENSG00000273245	AC092653.1	0.00634029	0.997774
ENSG00000230393	AC092667.1	-1.09571	0.0444066
ENSG00000272275	AC092687.3	0.0808594	0.91378
ENSG00000275764	AC092747.4	0.244521	0.406966
ENSG00000259238	AC092755.2	0.369186	0.583769
ENSG00000259771	AC092756.1	0.418571	0.719006
ENSG00000277144	AC092757.3	-0.00299692	0.998675
ENSG00000274987	AC092794.1	-0.0463806	0.977315
ENSG00000260805	AC092803.2	-0.154174	0.81022
ENSG00000282057	AC092807.3	-0.252925	0.412394
ENSG00000237101	AC092809.4	1.07096	0.0790618
ENSG00000253284	AC092828.1	0.524159	0.504915
ENSG00000241357	AC092849.2	-0.159776	0.915313
ENSG00000248787	AC092903.2	0.0912284	0.925861
ENSG00000243176	AC092944.1	-0.368143	0.324385
ENSG00000267152	AC093227.1	0.247011	0.607187
ENSG00000261840	AC093249.6	-0.0508223	0.942999
ENSG00000272335	AC093297.2	0.217053	0.539971
ENSG00000272979	AC093388.1	-0.451914	0.672922
ENSG00000284600	AC093390.2	-0.781279	0.155164
ENSG00000277324	AC093462.1	-0.126526	0.929244
ENSG00000265401	AC093484.3	0.12359	0.730824
ENSG00000269292	AC093503.2	-0.691199	0.076967
ENSG00000274904	AC093512.1	0.290455	0.764342
ENSG00000261613	AC093525.6	0.108046	0.925635
ENSG00000269937	AC093525.7	-0.425554	0.384949
ENSG00000250602	AC093535.1	1.28019	0.00953124
ENSG00000236529	AC093582.1	-0.338457	0.679214
ENSG00000241269	AC093620.1	0.472878	0.682118
ENSG00000269559	AC093677.2	-1.14479	0.281941
ENSG00000231156	AC093702.1	1.92308	0.0466157
ENSG00000273183	AC093726.2	-0.457391	0.605008
ENSG00000250950	AC093752.2	-0.718604	0.489408
ENSG00000273449	AC093788.1	0.79468	0.223894
ENSG00000272950	AC093799.1	-0.855499	0.122393
ENSG00000284968	AC093827.4	0.0129511	0.983926
ENSG00000270681	AC095055.1	-0.214995	0.749211
ENSG00000260296	AC095057.3	0.522508	0.480457
ENSG00000242396	AC096536.3	-0.485112	0.274435
ENSG00000272936	AC096586.1	-0.326471	0.745358
ENSG00000273369	AC096586.2	1.3647	0.15844
ENSG00000277007	AC096642.1	-0.0994237	0.947774
ENSG00000283839	AC096667.1	0.412521	0.34287
ENSG00000251555	AC096711.2	-0.889292	0.434057
ENSG00000273472	AC096733.2	0.465848	0.462437
ENSG00000261468	AC096921.2	0.314252	0.650285
ENSG00000273486	AC096992.2	0.333636	0.541284
ENSG00000228919	AC097381.1	0.809974	0.159351
ENSG00000245748	AC097382.2	0.379773	0.56939
ENSG00000272632	AC097504.2	0.853137	0.301027
ENSG00000248138	AC097515.1	-0.318097	0.708306
ENSG00000277855	AC097634.3	0.0420599	0.973346
ENSG00000277728	AC097641.2	-0.0571411	0.951186
ENSG00000273233	AC097724.1	0.413909	0.730576
ENSG00000234917	AC098484.2	0.508177	0.598071
ENSG00000248161	AC098487.1	0.109097	0.838562
ENSG00000241520	AC098820.3	1.08595	0.27354
ENSG00000284734	AC099063.4	-0.209218	0.794127
ENSG00000227496	AC099066.2	-1.25867	0.00257523
ENSG00000270426	AC099343.2	-0.237829	0.827472
ENSG00000247033	AC099508.1	0.565601	0.658014
ENSG00000261759	AC099518.5	0.310435	0.719156
ENSG00000278389	AC099518.6	-0.174704	0.889186
ENSG00000274698	AC099521.1	0.881651	0.321495
ENSG00000278829	AC099811.5	0.712632	0.508658
ENSG00000224738	AC099850.1	0.33702	0.576515
ENSG00000263916	AC100778.2	-0.586773	0.473084
ENSG00000265496	AC100778.3	0.00892442	0.99671
ENSG00000246731	AC100786.1	-0.580382	0.233745
ENSG00000275516	AC100791.3	-0.526219	0.605008
ENSG00000267042	AC100793.2	0.0848375	0.953197
ENSG00000267765	AC100793.3	-0.628845	0.417394
ENSG00000272010	AC100814.1	0.925802	0.0480355
ENSG00000265967	AC100830.3	0.357889	0.755225
ENSG00000278703	AC100847.1	0.693242	0.167293
ENSG00000254242	AC100849.2	0.373925	0.785976
ENSG00000273230	AC102953.2	-0.0872942	0.835964
ENSG00000274383	AC103691.1	-0.187201	0.728601
ENSG00000257178	AC103702.1	-0.286767	0.668407
ENSG00000259314	AC103739.2	1.36497	0.151513
ENSG00000259370	AC103740.1	-0.129752	0.756055
ENSG00000259727	AC103740.2	-1.32554	0.0240254
ENSG00000275322	AC103746.1	-0.607796	0.0338284
ENSG00000271725	AC103858.1	1.03631	0.0210745
ENSG00000249971	AC104116.1	1.00256	0.104505
ENSG00000254035	AC104117.3	-0.124283	0.897543
ENSG00000271862	AC104118.1	0.212159	0.761081
ENSG00000251314	AC104123.1	0.294022	0.608064
ENSG00000225420	AC104134.1	-0.144337	0.914112
ENSG00000236209	AC104135.1	0.120878	0.918183
ENSG00000248858	AC104211.1	2.65285	1.91404e-06
ENSG00000275612	AC104237.2	-2.27679	0.00459043
ENSG00000276668	AC104237.3	-1.11708	0.151513
ENSG00000241770	AC104411.1	-0.487895	0.590999
ENSG00000273204	AC104506.1	0.674428	0.42767
ENSG00000264290	AC104564.3	0.633284	0.543289
ENSG00000265625	AC104564.5	-0.308676	0.789168
ENSG00000244063	AC104653.2	-0.643266	0.326673
ENSG00000270210	AC104695.3	0.989536	0.0133548
ENSG00000270720	AC104785.1	0.607215	0.467613
ENSG00000260077	AC104794.2	-0.705215	0.00922586
ENSG00000251615	AC104825.1	0.236745	0.458399
ENSG00000272502	AC104958.2	-1.37528	0.000180412
ENSG00000261451	AC104964.3	-0.617011	0.463225
ENSG00000272505	AC104964.4	0.195456	0.838893
ENSG00000203392	AC105020.1	0.136229	0.824309
ENSG00000260892	AC105020.4	-0.796376	0.076967
ENSG00000274515	AC105020.5	-0.486891	0.675474
ENSG00000275454	AC105020.6	0.508156	0.441571
ENSG00000260269	AC105036.3	-0.0358423	0.969946
ENSG00000267257	AC105105.1	0.641413	0.107511
ENSG00000274354	AC105105.4	0.603077	0.531424
ENSG00000177725	AC105206.1	-0.155819	0.899891
ENSG00000252690	AC105339.2	0.264329	0.604545
ENSG00000205959	AC105345.1	0.604423	0.279274
ENSG00000249706	AC105384.1	1.63976	0.0175146
ENSG00000260361	AC106028.3	0.686958	0.266632
ENSG00000246792	AC106038.1	-1.19555	0.174669
ENSG00000274092	AC106739.2	0.329889	0.638616
ENSG00000274653	AC106782.6	-0.690708	0.3383
ENSG00000260293	AC106820.4	-0.154576	0.754771
ENSG00000260874	AC106820.5	-0.307549	0.726029
ENSG00000260899	AC106886.2	-0.124704	0.905233
ENSG00000261051	AC107021.2	0.917701	0.0827737
ENSG00000248468	AC107027.1	0.184956	0.853632
ENSG00000261167	AC107027.3	0.490762	0.131351
ENSG00000257526	AC107032.2	-1.67246	0.0319345
ENSG00000259959	AC107068.1	0.295099	0.388475
ENSG00000224218	AC107072.1	-0.84827	0.346289
ENSG00000272744	AC107214.2	-0.110778	0.911443
ENSG00000272970	AC107294.2	0.37523	0.349961
ENSG00000273403	AC107294.3	0.879252	0.145241
ENSG00000272157	AC107373.2	1.0205	0.100222
ENSG00000259891	AC107375.1	-0.301624	0.45317
ENSG00000248254	AC107398.2	-0.149002	0.925011
ENSG00000260657	AC107871.2	0.624787	0.547236
ENSG00000272343	AC107952.2	1.49376	0.0132123
ENSG00000245025	AC107959.1	-0.022058	0.959934
ENSG00000246130	AC107959.2	0.091326	0.934034
ENSG00000284948	AC107959.4	-0.130763	0.934598
ENSG00000265478	AC107982.3	0.34007	0.632052
ENSG00000242588	AC108010.1	-0.0858225	0.69773
ENSG00000238273	AC108058.1	2.11878	8.79338e-05
ENSG00000261889	AC108134.2	-0.426159	0.366291
ENSG00000254129	AC108449.1	0.266941	0.843697
ENSG00000259366	AC108449.2	0.0635843	0.884184
ENSG00000259607	AC108449.3	0.807984	0.439387
ENSG00000271590	AC108463.3	-0.639424	0.235002
ENSG00000273174	AC108673.2	-1.03986	0.0101604
ENSG00000273437	AC108673.3	1.19189	0.15116
ENSG00000244675	AC108676.1	-2.37882	1.95325e-08
ENSG00000274695	AC108704.1	0.935522	0.309612
ENSG00000278408	AC108861.1	5.11969	1.10064e-15
ENSG00000255224	AC109322.1	0.125105	0.802528
ENSG00000249635	AC109361.1	-1.04955	0.283375
ENSG00000259940	AC109449.1	0.112495	0.864949
ENSG00000260367	AC109460.1	0.209816	0.770422
ENSG00000261067	AC109460.3	-0.455632	0.621947
ENSG00000223930	AC109779.1	1.69462	1.28263e-06
ENSG00000251199	AC109830.1	-0.614994	0.594568
ENSG00000227279	AC110015.1	-0.223619	0.715276
ENSG00000277152	AC110048.2	0.151404	0.819001
ENSG00000262877	AC110285.2	0.0911973	0.883506
ENSG00000273077	AC110609.1	0.59026	0.61459
ENSG00000270019	AC110769.2	0.376584	0.644112
ENSG00000272650	AC110792.3	0.86805	0.296367
ENSG00000267263	AC111170.2	-0.54189	0.541808
ENSG00000266998	AC111182.1	0.673553	0.574941
ENSG00000272149	AC112211.1	0.773979	0.172105
ENSG00000272717	AC112236.2	1.24883	0.0304752
ENSG00000261159	AC112484.3	1.45725	0.115582
ENSG00000269888	AC112491.1	1.26163	0.171025
ENSG00000241886	AC112496.1	0.463502	0.458731
ENSG00000273454	AC112503.2	0.657588	0.537709
ENSG00000224132	AC112715.1	-0.0254045	0.988714
ENSG00000222022	AC112721.1	-0.844999	0.052779
ENSG00000222032	AC112721.2	-1.18328	0.00237141
ENSG00000263826	AC112907.3	0.102983	0.872648
ENSG00000274425	AC114271.1	0.112344	0.792012
ENSG00000248927	AC114284.1	-0.813901	0.00840224
ENSG00000250049	AC114316.2	-1.8427	0.00468011
ENSG00000215692	AC114730.1	0.563331	0.291347
ENSG00000261604	AC114947.2	0.213521	0.854425
ENSG00000249492	AC114956.3	0.461264	0.552129
ENSG00000251023	AC114980.1	0.18519	0.862618
ENSG00000204620	AC115618.1	-0.255969	0.715045
ENSG00000264116	AC116003.1	0.508369	0.614281
ENSG00000254639	AC116021.1	-0.158547	0.876508
ENSG00000262172	AC116025.2	0.169	0.869245
ENSG00000259326	AC116158.1	-0.377524	0.619259
ENSG00000249856	AC116337.3	0.000602	0.999654
ENSG00000260487	AC116348.1	0.637717	0.552139
ENSG00000261332	AC116348.2	-0.374747	0.670816
ENSG00000214708	AC116407.1	0.121468	0.872574
ENSG00000277511	AC116407.2	0.187579	0.811662
ENSG00000274918	AC116447.1	-0.0303771	0.977773
ENSG00000246308	AC116535.1	0.0144383	0.990936
ENSG00000250126	AC116563.1	0.133757	0.866742
ENSG00000273133	AC116651.1	-1.61271	0.0666484
ENSG00000271009	AC116667.1	0.121087	0.892806
ENSG00000261351	AC116913.1	0.378053	0.516087
ENSG00000257653	AC117498.1	0.24705	0.808641
ENSG00000205041	AC118344.1	-0.061179	0.929543
ENSG00000228084	AC118553.1	0.828142	0.0596049
ENSG00000253392	AC119403.1	-0.00783152	0.995912
ENSG00000255366	AC120036.4	1.64193	8.13056e-05
ENSG00000271971	AC120053.1	0.133324	0.832706
ENSG00000278713	AC120114.3	0.435623	0.308464
ENSG00000277010	AC120498.10	-2.01995	0.00106899
ENSG00000273551	AC120498.8	-0.622965	0.0384648
ENSG00000274751	AC120498.9	0.276339	0.830111
ENSG00000225399	AC121247.1	-0.289353	0.579085
ENSG00000257829	AC121757.1	2.21398	0.000144214
ENSG00000273987	AC121761.2	0.890786	0.316917
ENSG00000273156	AC124016.2	-0.278504	0.746067
ENSG00000272077	AC124045.1	0.0398184	0.951338
ENSG00000253414	AC124067.2	-2.23099	0.00390425
ENSG00000261845	AC124283.1	-0.0283136	0.985085
ENSG00000260196	AC124798.1	-0.458489	0.124288
ENSG00000249776	AC124854.1	-1.12835	0.186475
ENSG00000257252	AC124947.1	1.52243	0.137273
ENSG00000274630	AC125257.2	0.293036	0.755262
ENSG00000267655	AC125437.1	-0.43758	0.516518
ENSG00000219410	AC125494.1	0.33947	0.539971
ENSG00000269892	AC125494.2	0.0946194	0.89561
ENSG00000258232	AC125611.3	-0.684372	0.0273433
ENSG00000250899	AC125807.2	-0.155362	0.663768
ENSG00000271993	AC126118.1	-0.752712	0.339065
ENSG00000264215	AC126365.1	-0.558484	0.484193
ENSG00000260466	AC126696.2	-1.04817	0.195031
ENSG00000260498	AC126696.3	0.0731354	0.953466
ENSG00000248994	AC126768.2	0.915428	0.396881
ENSG00000266490	AC127024.5	0.295809	0.57888
ENSG00000276250	AC127024.6	-0.236049	0.843697
ENSG00000250790	AC127070.2	0.526622	0.423256
ENSG00000262873	AC127496.5	-0.292423	0.829215
ENSG00000263218	AC127496.6	-0.0534946	0.957687
ENSG00000270055	AC127502.2	0.338539	0.382065
ENSG00000260647	AC127537.1	-0.466877	0.660231
ENSG00000277597	AC130343.2	-0.756356	0.457998
ENSG00000260934	AC130456.5	0.731565	0.499497
ENSG00000276564	AC130650.2	-0.0886274	0.945611
ENSG00000273568	AC131009.3	0.106745	0.899687
ENSG00000275871	AC131025.2	0.858356	0.338697
ENSG00000277873	AC131159.2	-0.621905	0.244501
ENSG00000250777	AC131956.2	-0.721173	0.340488
ENSG00000268403	AC132192.2	0.332592	0.446735
ENSG00000251031	AC132803.1	-1.25477	0.025889
ENSG00000260563	AC132872.1	-0.228961	0.648622
ENSG00000275888	AC132872.3	-0.355638	0.661628
ENSG00000273113	AC133528.1	0.316816	0.619259
ENSG00000278716	AC133540.1	0.638396	0.518148
ENSG00000260570	AC133550.1	-0.129526	0.916559
ENSG00000261766	AC133550.2	-0.103571	0.924589
ENSG00000275494	AC133552.5	-0.20309	0.75292
ENSG00000261327	AC134312.5	-1.54946	5.69349e-08
ENSG00000244380	AC134772.1	0.0629264	0.869941
ENSG00000275263	AC135048.3	-0.555796	0.421893
ENSG00000232748	AC135050.1	-0.0997632	0.89949
ENSG00000260911	AC135050.3	0.00155929	0.998997
ENSG00000262766	AC135050.5	-0.453233	0.507606
ENSG00000278133	AC135050.6	0.0173643	0.974325
ENSG00000269947	AC135178.5	-0.814823	0.155368
ENSG00000277895	AC135279.3	0.778513	0.301371
ENSG00000272742	AC135457.1	0.181349	0.892806
ENSG00000272182	AC135507.1	-0.0610733	0.924103
ENSG00000251661	AC136475.1	0.0786337	0.918292
ENSG00000254910	AC136475.2	0.394001	0.57007
ENSG00000255328	AC136475.5	1.60248	0.00840765
ENSG00000250999	AC136604.3	0.192329	0.828897
ENSG00000223343	AC137630.1	0.349877	0.66007
ENSG00000235236	AC137630.2	0.356358	0.723909
ENSG00000272434	AC137630.3	0.285532	0.587118
ENSG00000273211	AC137630.4	-0.216955	0.845155
ENSG00000276727	AC137834.2	-0.217972	0.794327
ENSG00000261253	AC137932.2	-3.74961	5.51999e-06
ENSG00000224888	AC138028.2	-0.0554209	0.934151
ENSG00000260121	AC138028.4	-0.12832	0.820531
ENSG00000260617	AC138028.5	-0.0133872	0.995001
ENSG00000278341	AC138028.6	-0.165522	0.795211
ENSG00000267288	AC138150.2	0.527652	0.428064
ENSG00000264456	AC138207.4	-0.0804846	0.924103
ENSG00000183154	AC138356.1	0.0441247	0.97291
ENSG00000278467	AC138393.3	-0.516916	0.548589
ENSG00000274253	AC138649.1	1.31894	0.151513
ENSG00000272172	AC138696.2	-0.302393	0.623612
ENSG00000250909	AC138956.1	0.150269	0.883595
ENSG00000278000	AC139100.2	0.838001	0.336002
ENSG00000229848	AC139149.1	0.116848	0.812683
ENSG00000262049	AC139530.1	-0.0370526	0.943375
ENSG00000275902	AC139530.3	-0.0883661	0.926964
ENSG00000251600	AC139713.2	-0.106153	0.935375
ENSG00000278126	AC139768.1	-0.298917	0.460987
ENSG00000247679	AC139795.2	-0.12271	0.801265
ENSG00000233799	AC139887.1	-0.0973013	0.92889
ENSG00000272588	AC139887.4	-0.286348	0.762069
ENSG00000261093	AC141586.3	0.605075	0.27298
ENSG00000276728	AC142472.1	-0.0311288	0.961277
ENSG00000258210	AC144548.1	0.235136	0.875953
ENSG00000261888	AC144831.1	0.877757	5.82335e-07
ENSG00000255495	AC145124.1	-0.218489	0.676941
ENSG00000235296	AC145207.1	-0.266562	0.851105
ENSG00000262413	AC145207.2	-0.126141	0.765116
ENSG00000262831	AC145207.3	0.589033	0.0287562
ENSG00000263585	AC145207.4	-0.00135826	0.998891
ENSG00000263731	AC145207.5	-0.0397482	0.941875
ENSG00000264769	AC145207.8	0.352894	0.651552
ENSG00000251417	AC145285.2	-0.173578	0.843866
ENSG00000260796	AC145285.3	0.289884	0.819001
ENSG00000275807	AC145285.6	-0.407153	0.348263
ENSG00000274427	AC145423.2	0.313385	0.766872
ENSG00000278112	AC145423.3	-1.50975	0.0514035
ENSG00000244459	AC147067.1	0.240813	0.550772
ENSG00000262075	AC174065.1	0.529148	0.301218
ENSG00000272843	AC211476.2	-0.477532	0.625384
ENSG00000235078	AC231981.1	0.417058	0.230575
ENSG00000270012	AC232271.1	-0.151249	0.795244
ENSG00000261600	AC233266.2	0.678477	0.411301
ENSG00000233250	AC233728.1	1.09729	0.210938
ENSG00000236263	AC234582.2	0.332525	0.744006
ENSG00000269902	AC234772.3	1.44005	0.160377
ENSG00000261101	AC234775.3	0.0664147	0.912657
ENSG00000232721	AC239800.2	0.291543	0.829215
ENSG00000227733	AC239809.3	-0.759164	0.115327
ENSG00000278431	AC243547.2	0.0981288	0.931683
ENSG00000259774	AC243562.3	0.107176	0.943127
ENSG00000233030	AC243772.2	0.964043	0.032976
ENSG00000275552	AC243965.2	-1.25875	0.03576
ENSG00000285184	AC244033.2	0.195418	0.629536
ENSG00000276170	AC244153.1	-0.0659246	0.913292
ENSG00000234998	AC244453.3	-0.524209	0.463225
ENSG00000272108	AC244517.1	0.621411	0.570133
ENSG00000274422	AC245060.5	0.127145	0.834875
ENSG00000272824	AC245100.7	0.703234	0.300546
ENSG00000280195	AC245140.2	0.106082	0.772378
ENSG00000285018	AC245140.3	-0.053684	0.916041
ENSG00000274265	AC245297.3	-0.224532	0.70941
ENSG00000253853	AC246817.1	-0.162357	0.820612
ENSG00000232545	AC253536.3	0.284495	0.687412
ENSG00000272482	AC254633.1	1.86558	2.45829e-12
ENSG00000287110	ACAD9-DT	0.48957	0.400407
ENSG00000229325	ACAP2-IT1	-0.155238	0.887161
ENSG00000234478	ACBD3-AS1	0.344268	0.65531
ENSG00000204581	ACOXL-AS1	0.948365	0.056801
ENSG00000180139	ACTA2-AS1	0.597878	0.000222004
ENSG00000259062	ACTN1-DT	0.452061	0.484989
ENSG00000228857	ACTR3-AS1	-0.0035596	0.997329
ENSG00000229589	ACVR2B-AS1	0.271507	0.617775
ENSG00000267439	AD000671.3	0.412505	0.610091
ENSG00000241684	ADAMTS9-AS2	1.46404	1.77598e-05
ENSG00000203804	ADAMTSL4-AS1	0.524618	0.375292
ENSG00000237781	ADAMTSL4-AS2	-0.319663	0.638248
ENSG00000290554	ADCY10P1	-0.910038	0.137055
ENSG00000203876	ADD3-AS1	0.738344	0.241052
ENSG00000267169	ADGRL1-AS1	0.0171712	0.975695
ENSG00000272734	ADIRF-AS1	-0.45445	0.244501
ENSG00000254554	ADM-DT	0.744077	0.130803
ENSG00000259456	ADNP-AS1	0.0446468	0.947812
ENSG00000260898	ADPGK-AS1	0.478734	0.626964
ENSG00000267786	AF038458.3	-0.107881	0.936321
ENSG00000272163	AF106564.1	0.324724	0.232563
ENSG00000235609	AF127577.4	0.2313	0.453491
ENSG00000231125	AF129075.1	0.0975335	0.934378
ENSG00000273254	AF129075.2	0.319561	0.762628
ENSG00000255310	AF131215.5	0.294687	0.331523
ENSG00000269918	AF131215.6	0.0424524	0.937871
ENSG00000280273	AF131216.4	0.196352	0.785988
ENSG00000232855	AF165147.1	1.85603	1.14348e-12
ENSG00000260651	AF213884.3	-0.647781	0.548385
ENSG00000223697	AF230666.1	-0.22247	0.807257
ENSG00000271743	AF287957.1	-0.517566	0.616436
ENSG00000272620	AFAP1-AS1	0.264722	0.391204
ENSG00000260101	AFTPH-DT	-0.491171	0.382028
ENSG00000250131	AGA-DT	0.446809	0.336962
ENSG00000235529	AGAP1-IT1	-0.24059	0.872766
ENSG00000255737	AGAP2-AS1	-0.166357	0.384965
ENSG00000231028	AHI1-DT	0.170934	0.834001
ENSG00000229425	AJ009632.2	0.930335	0.194126
ENSG00000274248	AJ011932.1	0.553633	0.25034
ENSG00000280604	AJ239328.1	1.22582	0.0227612
ENSG00000258457	AJUBA-DT	-0.314241	0.543762
ENSG00000263004	AKAP1-DT	0.148103	0.850945
ENSG00000272977	AL008721.2	-0.205133	0.594719
ENSG00000271984	AL008726.1	0.669069	0.211573
ENSG00000215022	AL008729.1	-0.685625	0.139577
ENSG00000272379	AL008729.2	-0.18629	0.857508
ENSG00000272848	AL009176.1	0.257149	0.661245
ENSG00000228172	AL020996.1	-0.0729009	0.909062
ENSG00000270031	AL020997.3	0.12965	0.908571
ENSG00000213062	AL021068.1	0.259502	0.610828
ENSG00000272316	AL021368.2	-0.153196	0.794127
ENSG00000275894	AL021578.1	-0.458363	0.642937
ENSG00000225450	AL021707.1	0.367685	0.667173
ENSG00000228274	AL021707.2	0.0158088	0.975986
ENSG00000230149	AL021707.3	-0.207329	0.768163
ENSG00000244491	AL021707.5	0.853742	0.226489
ENSG00000272669	AL021707.6	0.0014318	0.998891
ENSG00000273076	AL021707.7	-0.809535	0.403059
ENSG00000272468	AL021807.1	0.684067	0.0825381
ENSG00000269919	AL022067.1	0.865115	0.457653
ENSG00000226310	AL022157.1	-0.23979	0.807404
ENSG00000226375	AL022310.1	-2.65812	0.000119005
ENSG00000279738	AL022311.1	0.135328	0.780475
ENSG00000228719	AL022313.2	0.559461	0.664723
ENSG00000272720	AL022322.1	-0.165886	0.808641
ENSG00000272836	AL022328.1	0.343061	0.753015
ENSG00000228201	AL022341.1	0.0101667	0.995352
ENSG00000262528	AL022341.2	-0.76262	0.420318
ENSG00000259869	AL022344.2	-0.0400647	0.974325
ENSG00000227192	AL023581.2	0.0755465	0.954561
ENSG00000272209	AL023583.1	1.3624	0.0482216
ENSG00000270638	AL023806.1	0.243029	0.819742
ENSG00000272476	AL024507.2	0.0494167	0.917576
ENSG00000275438	AL031008.1	-1.53445	0.0773625
ENSG00000271755	AL031118.1	-0.0895738	0.951668
ENSG00000268575	AL031282.2	0.295975	0.453979
ENSG00000278206	AL031320.2	-0.369336	0.723839
ENSG00000272432	AL031432.3	1.30734	0.185599
ENSG00000284602	AL031432.4	-0.0396584	0.956454
ENSG00000284657	AL031432.5	0.134953	0.92174
ENSG00000272582	AL031587.3	-0.0569751	0.930865
ENSG00000284633	AL031590.1	-0.677892	0.293486
ENSG00000280434	AL031595.3	-0.799979	0.109419
ENSG00000224228	AL031599.1	-0.874849	0.126666
ENSG00000261641	AL031600.3	0.112457	0.854098
ENSG00000277829	AL031651.2	-0.23773	0.835964
ENSG00000273951	AL031667.3	-0.871924	0.40485
ENSG00000278383	AL031673.1	0.777499	0.226409
ENSG00000261505	AL031714.1	0.241258	0.640769
ENSG00000272465	AL031768.1	-0.0164977	0.99321
ENSG00000272345	AL031775.1	0.510709	0.156168
ENSG00000279833	AL031846.2	0.285285	0.774321
ENSG00000271746	AL031848.2	0.891726	0.394701
ENSG00000272277	AL031963.3	-0.0609179	0.927168
ENSG00000260920	AL031985.3	-0.782314	0.000878
ENSG00000236528	AL033528.2	0.286986	0.80343
ENSG00000271367	AL034374.1	0.909781	0.109419
ENSG00000205444	AL034376.1	0.982096	0.0452569
ENSG00000284716	AL034417.3	0.401184	0.764379
ENSG00000284747	AL034417.4	-0.280264	0.692094
ENSG00000236772	AL034550.1	0.262514	0.819078
ENSG00000260257	AL035071.1	0.10097	0.840175
ENSG00000277938	AL035252.3	-0.394787	0.503589
ENSG00000230498	AL035409.1	-0.365972	0.471279
ENSG00000234147	AL035446.1	-0.984125	0.0247256
ENSG00000250917	AL035458.2	0.632961	0.543762
ENSG00000275632	AL035461.2	-0.967611	0.132131
ENSG00000284830	AL049557.1	-0.058937	0.969553
ENSG00000226526	AL049569.1	-0.090777	0.899357
ENSG00000258646	AL049780.1	0.178499	0.883192
ENSG00000224066	AL049795.1	0.378199	0.487573
ENSG00000260464	AL049796.1	-0.13877	0.849178
ENSG00000259969	AL049838.1	0.0612506	0.918705
ENSG00000269910	AL049840.2	0.892997	0.306408
ENSG00000269940	AL049840.3	0.0496356	0.897306
ENSG00000269958	AL049840.4	0.0159522	0.968369
ENSG00000270108	AL049840.5	-0.116391	0.831329
ENSG00000258526	AL049875.1	0.144888	0.870006
ENSG00000266993	AL050343.1	0.560567	0.341509
ENSG00000270792	AL050403.2	-0.396729	0.741562
ENSG00000232358	AL050404.1	-0.92983	0.113516
ENSG00000237927	AL078604.2	0.109094	0.939978
ENSG00000255252	AL078612.1	0.424784	0.327477
ENSG00000273004	AL078644.2	0.299954	0.675688
ENSG00000258535	AL079307.1	-0.0902473	0.943137
ENSG00000227627	AL080276.2	0.532101	0.391329
ENSG00000271789	AL080317.2	-0.260402	0.637408
ENSG00000272356	AL080317.3	-0.0348058	0.957264
ENSG00000240591	AL096701.3	0.106659	0.927544
ENSG00000273821	AL096828.3	-0.78239	0.37786
ENSG00000271857	AL096865.1	0.0489874	0.946291
ENSG00000260669	AL096870.2	0.513292	0.566076
ENSG00000276603	AL109614.1	0.249421	0.781392
ENSG00000226849	AL109811.1	0.00658603	0.996263
ENSG00000277287	AL109976.1	-0.446576	0.266632
ENSG00000259515	AL117209.1	0.15836	0.805983
ENSG00000275457	AL117332.1	0.237284	0.567043
ENSG00000276649	AL117335.1	-0.483163	0.432308
ENSG00000269952	AL117336.2	1.53808	0.00391284
ENSG00000272983	AL117339.4	0.15121	0.8181
ENSG00000273759	AL117379.1	0.101098	0.912285
ENSG00000268858	AL118506.1	-0.103928	0.737625
ENSG00000223393	AL118511.1	-0.882238	0.00743336
ENSG00000271780	AL118558.3	-0.35035	0.394341
ENSG00000272444	AL118558.4	-0.227032	0.832857
ENSG00000259977	AL121578.3	-3.1146	1.03807e-18
ENSG00000277692	AL121583.1	-1.94715	0.0106472
ENSG00000271228	AL121655.1	-0.105049	0.936321
ENSG00000231010	AL121672.1	-0.0102379	0.99671
ENSG00000273289	AL121672.3	0.374747	0.734147
ENSG00000230309	AL121718.1	-1.36051	0.0475455
ENSG00000238258	AL121748.2	-0.0513542	0.937212
ENSG00000273312	AL121749.1	-0.450406	0.32796
ENSG00000274414	AL121772.1	0.112109	0.920473
ENSG00000276952	AL121772.3	-0.57171	0.452393
ENSG00000250681	AL121796.1	2.24433	3.54356e-05
ENSG00000273619	AL121832.2	0.158465	0.790355
ENSG00000275437	AL121832.3	-0.428988	0.505078
ENSG00000277425	AL121890.4	0.011032	0.99671
ENSG00000270001	AL121894.2	0.25867	0.698547
ENSG00000275223	AL121906.2	0.195158	0.867567
ENSG00000225806	AL121917.1	0.0213363	0.98791
ENSG00000273262	AL121928.1	0.709135	0.38663
ENSG00000272009	AL121944.1	-0.148436	0.868259
ENSG00000225279	AL121987.1	0.121938	0.885139
ENSG00000227741	AL121987.2	-0.612019	0.0909495
ENSG00000237301	AL121992.1	0.819287	0.380078
ENSG00000258824	AL122035.1	0.0878689	0.878203
ENSG00000272909	AL122035.2	0.210872	0.637853
ENSG00000258744	AL132800.1	0.0856776	0.862891
ENSG00000258682	AL132989.1	0.520481	0.566136
ENSG00000257522	AL133166.1	-2.21044	1.75724e-06
ENSG00000236662	AL133215.1	0.213663	0.86863
ENSG00000273162	AL133215.2	-0.908296	0.135637
ENSG00000273828	AL133227.1	-0.0078182	0.996186
ENSG00000232043	AL133230.1	0.341461	0.749148
ENSG00000276334	AL133243.2	-0.0516938	0.93696
ENSG00000276517	AL133243.3	-0.137461	0.85298
ENSG00000260954	AL133297.1	-0.339678	0.801537
ENSG00000251194	AL133330.1	-0.646684	0.190731
ENSG00000260000	AL133338.1	-0.109446	0.840217
ENSG00000259130	AL133371.3	-2.4506	0.00824407
ENSG00000227388	AL133410.1	-1.03568	0.19089
ENSG00000228843	AL133410.2	-0.118351	0.883592
ENSG00000234961	AL133415.1	-0.472588	0.00149059
ENSG00000238280	AL133417.1	0.268119	0.792665
ENSG00000235426	AL133481.1	0.736682	0.190678
ENSG00000273893	AL133520.1	-0.00799266	0.99321
ENSG00000258982	AL133523.1	-0.204405	0.689149
ENSG00000260830	AL135744.1	0.297699	0.806249
ENSG00000236514	AL135791.1	-0.0413311	0.976212
ENSG00000266680	AL135905.1	-0.0769224	0.88132
ENSG00000272447	AL135925.1	-0.181815	0.70468
ENSG00000274015	AL136038.5	-0.158211	0.830159
ENSG00000270412	AL136084.3	1.10073	0.0801051
ENSG00000269967	AL136115.2	0.0892752	0.943137
ENSG00000272114	AL136131.3	0.00945591	0.991606
ENSG00000259321	AL136295.2	-0.163071	0.827472
ENSG00000276698	AL136295.6	0.0514824	0.955646
ENSG00000278784	AL136295.7	0.0724737	0.907025
ENSG00000272223	AL136304.1	-0.593042	0.525318
ENSG00000254821	AL136309.4	0.579174	0.593297
ENSG00000229728	AL136531.1	0.206608	0.860615
ENSG00000274718	AL136964.1	0.168652	0.823515
ENSG00000237280	AL136982.3	0.745709	0.465217
ENSG00000272033	AL136984.1	-1.28512	0.158146
ENSG00000224407	AL136988.1	0.549668	0.208478
ENSG00000283828	AL137002.2	-0.465092	0.195368
ENSG00000272341	AL137003.2	0.395536	0.171495
ENSG00000229116	AL137026.1	0.665042	0.114289
ENSG00000274270	AL137060.1	0.929084	0.165311
ENSG00000283078	AL137077.2	-0.700078	0.260285
ENSG00000272084	AL137127.1	0.737818	0.0632374
ENSG00000232807	AL137186.2	0.531941	0.0772533
ENSG00000259053	AL137230.2	-0.497118	0.397743
ENSG00000270008	AL137247.1	0.3632	0.57344
ENSG00000259088	AL137779.2	-0.252163	0.825334
ENSG00000261553	AL137782.1	-0.943528	0.0288728
ENSG00000284966	AL138689.2	-0.839201	0.229848
ENSG00000244332	AL138759.1	-0.0903674	0.91682
ENSG00000272572	AL138762.1	-0.367887	0.541156
ENSG00000196566	AL138767.1	-0.0118502	0.987769
ENSG00000275329	AL138781.2	0.76954	0.257348
ENSG00000277151	AL138820.1	-0.66589	0.458399
ENSG00000230648	AL138831.1	-0.346268	0.803133
ENSG00000228793	AL138881.1	-0.388417	0.52431
ENSG00000285278	AL138885.3	-0.369835	0.561859
ENSG00000235119	AL138895.1	-0.821213	0.303919
ENSG00000276809	AL138955.1	-0.968803	0.246388
ENSG00000277831	AL138960.1	0.314638	0.801537
ENSG00000273149	AL138963.3	0.24199	0.0800858
ENSG00000277368	AL138966.2	-0.194436	0.827895
ENSG00000277763	AL138995.1	-0.20909	0.800917
ENSG00000277386	AL138999.1	0.570979	0.456839
ENSG00000259118	AL139022.1	0.325299	0.58536
ENSG00000272158	AL139022.2	0.115627	0.932833
ENSG00000238221	AL139095.4	-0.4562	0.623395
ENSG00000258377	AL139099.1	-0.172426	0.730246
ENSG00000248458	AL139147.1	1.54192	0.0603334
ENSG00000230615	AL139220.2	0.0737591	0.885842
ENSG00000230928	AL139241.1	0.215789	0.854425
ENSG00000272008	AL139274.2	0.122203	0.926065
ENSG00000240731	AL139287.1	0.0968416	0.883592
ENSG00000259049	AL139317.3	-0.451926	0.457735
ENSG00000234699	AL139339.1	-0.707786	0.41467
ENSG00000273485	AL139339.2	-0.249835	0.780004
ENSG00000230490	AL139383.1	-1.21042	0.201589
ENSG00000274922	AL139384.1	0.100458	0.920175
ENSG00000277159	AL139384.2	-0.130984	0.83225
ENSG00000231863	AL139393.1	2.45648	2.32814e-14
ENSG00000284391	AL139398.1	-1.92483	1.63508e-06
ENSG00000277687	AL139407.1	-0.140477	0.843697
ENSG00000272078	AL139423.1	0.415755	0.481056
ENSG00000284642	AL139424.2	0.0528737	0.955686
ENSG00000235100	AL157400.3	0.0672647	0.959047
ENSG00000227482	AL157702.2	-0.974903	0.159945
ENSG00000232934	AL157786.1	0.906107	0.137178
ENSG00000258504	AL157871.1	0.203271	0.819816
ENSG00000258666	AL157871.4	0.0431555	0.957707
ENSG00000258904	AL157871.5	0.598139	0.398124
ENSG00000282787	AL157888.1	-0.0816232	0.954093
ENSG00000262198	AL157931.1	0.991171	0.320858
ENSG00000231530	AL157932.1	0.546273	0.472524
ENSG00000273381	AL158071.4	0.533809	0.604706
ENSG00000234055	AL158151.2	0.0405488	0.977195
ENSG00000268707	AL158151.4	-0.208124	0.865202
ENSG00000270589	AL158163.1	0.660598	0.579085
ENSG00000227076	AL158166.1	0.444539	0.647819
ENSG00000260912	AL158206.1	1.22251	9.18815e-08
ENSG00000233547	AL158212.2	0.656977	0.263143
ENSG00000260917	AL158212.3	0.171483	0.526679
ENSG00000232939	AL158829.1	-1.67755	0.0803231
ENSG00000241720	AL158847.1	0.0390984	0.975899
ENSG00000226571	AL158850.1	-0.0928771	0.867113
ENSG00000231811	AL159166.1	0.722069	0.156353
ENSG00000272871	AL159169.2	-0.35247	0.743689
ENSG00000258634	AL160006.1	-0.241838	0.299852
ENSG00000276012	AL160153.1	1.39395	0.062814
ENSG00000284977	AL160272.1	1.04484	0.0146286
ENSG00000247970	AL160313.1	0.0795262	0.946584
ENSG00000228830	AL160408.2	0.314068	0.470763
ENSG00000277270	AL160412.1	1.48635	0.098234
ENSG00000275202	AL161421.1	1.93439	1.55982e-24
ENSG00000226706	AL161452.1	0.352812	0.748905
ENSG00000233178	AL161457.2	0.300815	0.555395
ENSG00000278518	AL161645.1	0.566579	0.616106
ENSG00000278071	AL161669.3	0.635309	0.0586063
ENSG00000271155	AL161729.1	0.249403	0.622796
ENSG00000271314	AL161729.2	1.26441	0.203247
ENSG00000214770	AL161756.1	0.644949	0.580671
ENSG00000278291	AL161772.1	-0.378155	0.314703
ENSG00000276672	AL161891.1	0.19422	0.796912
ENSG00000234698	AL161937.1	0.802819	0.475492
ENSG00000258789	AL162171.1	0.493923	0.625355
ENSG00000278576	AL162171.3	-0.368099	0.589499
ENSG00000230074	AL162231.2	0.189609	0.526679
ENSG00000261215	AL162231.4	-0.528053	0.445198
ENSG00000271853	AL162258.1	-0.0786116	0.935334
ENSG00000272030	AL162258.2	0.126125	0.851527
ENSG00000277959	AL162274.2	-0.789861	0.186437
ENSG00000258938	AL162311.3	0.186566	0.731949
ENSG00000231856	AL162377.1	0.210075	0.672083
ENSG00000234740	AL162386.2	-0.291208	0.676941
ENSG00000261447	AL162412.1	-0.559014	0.67126
ENSG00000279571	AL162426.1	0.0905368	0.899219
ENSG00000243155	AL162431.2	-0.119573	0.868057
ENSG00000179253	AL162457.1	0.0698277	0.954383
ENSG00000275741	AL162497.1	2.01668	3.18324e-07
ENSG00000227068	AL162584.1	6.46653	5.5564e-08
ENSG00000225032	AL162586.1	0.525127	0.140421
ENSG00000273110	AL162591.2	0.147359	0.90231
ENSG00000260046	AL162632.3	0.811275	0.42767
ENSG00000285424	AL162718.1	0.195131	0.850945
ENSG00000227200	AL162724.1	0.730448	0.37117
ENSG00000233817	AL162727.1	-0.951504	0.376442
ENSG00000260179	AL162741.1	0.0995437	0.943375
ENSG00000224945	AL353150.1	1.26067	7.53423e-06
ENSG00000269934	AL353593.2	-0.0463128	0.928871
ENSG00000270605	AL353622.1	0.783039	0.128045
ENSG00000233706	AL353689.2	0.801463	0.362835
ENSG00000260360	AL353708.1	-1.17115	0.056801
ENSG00000272906	AL353708.3	0.48227	0.186808
ENSG00000261696	AL353732.1	1.70112	0.0636729
ENSG00000232110	AL353751.1	-2.14082	1.60069e-06
ENSG00000283064	AL353759.1	0.0669007	0.947812
ENSG00000224764	AL353768.1	1.12787	0.167852
ENSG00000259994	AL353796.1	0.0510281	0.92889
ENSG00000273363	AL353801.3	0.872835	0.40517
ENSG00000261334	AL353803.4	1.20531	0.178602
ENSG00000268615	AL353803.5	-0.589251	0.605008
ENSG00000277662	AL354696.1	0.0173348	0.989043
ENSG00000278390	AL354696.2	0.0873044	0.910251
ENSG00000225339	AL354740.1	-0.973274	0.000203399
ENSG00000273483	AL354760.1	-0.144574	0.924593
ENSG00000278177	AL354811.1	1.01826	0.101849
ENSG00000255438	AL354813.1	1.93274	0.00115936
ENSG00000226332	AL354836.1	-0.228358	0.665678
ENSG00000268926	AL354861.3	-0.272849	0.730571
ENSG00000271992	AL354872.2	0.010716	0.995915
ENSG00000229065	AL354893.2	0.0839106	0.942999
ENSG00000254545	AL354919.2	-1.30222	0.197313
ENSG00000275964	AL355001.2	-0.0759984	0.882945
ENSG00000258412	AL355102.1	0.0056254	0.997215
ENSG00000271551	AL355297.4	-0.242659	0.707945
ENSG00000228703	AL355310.2	0.0392135	0.967643
ENSG00000231760	AL355312.2	0.338102	0.491276
ENSG00000273132	AL355312.3	0.271151	0.751021
ENSG00000225092	AL355336.1	-0.169689	0.894208
ENSG00000231970	AL355490.2	0.017237	0.995001
ENSG00000227678	AL355581.1	0.174372	0.910901
ENSG00000271754	AL355802.2	-0.326961	0.675467
ENSG00000273221	AL355816.2	-0.505235	0.611562
ENSG00000258471	AL355922.2	-0.0293139	0.987325
ENSG00000273066	AL355987.4	0.449636	0.32796
ENSG00000258768	AL356019.2	0.17268	0.70941
ENSG00000226149	AL356124.1	-0.634634	0.276948
ENSG00000224583	AL356277.2	-1.28412	0.197601
ENSG00000228395	AL356481.1	0.0609406	0.919961
ENSG00000280758	AL356481.3	-0.0764063	0.913817
ENSG00000260947	AL356489.2	-0.437923	0.487321
ENSG00000272195	AL356512.1	0.911984	0.05032
ENSG00000276527	AL356515.1	1.18745	0.000861172
ENSG00000276317	AL357033.3	0.900049	0.329445
ENSG00000272463	AL357054.4	0.42889	0.321123
ENSG00000223786	AL357507.1	-0.61487	0.0969348
ENSG00000280425	AL357673.2	-0.170283	0.886288
ENSG00000271427	AL358072.1	-0.460302	0.66765
ENSG00000225140	AL358216.1	-1.46261	0.0491162
ENSG00000258711	AL358334.2	3.28062	1.23613e-05
ENSG00000258745	AL358334.3	0.248185	0.856437
ENSG00000273026	AL358472.3	0.18945	0.850575
ENSG00000282386	AL358472.4	0.258555	0.680777
ENSG00000176868	AL358781.1	0.590216	0.193857
ENSG00000282772	AL358790.1	0.190252	0.866629
ENSG00000278899	AL358852.1	0.215962	0.73284
ENSG00000261839	AL358933.1	-0.466259	0.70408
ENSG00000272696	AL359091.4	0.613114	0.177706
ENSG00000273186	AL359091.5	0.171566	0.740987
ENSG00000223528	AL359094.1	0.32413	0.794808
ENSG00000226334	AL359182.1	0.706956	0.176377
ENSG00000272817	AL359198.1	-0.00884038	0.99671
ENSG00000258561	AL359232.1	0.528938	0.647819
ENSG00000260879	AL359258.2	0.0928087	0.916145
ENSG00000272914	AL359532.1	0.489524	0.589406
ENSG00000271978	AL359643.2	-0.177141	0.730044
ENSG00000272142	AL359643.3	0.0962893	0.795843
ENSG00000260273	AL359711.2	0.127882	0.917231
ENSG00000233967	AL359715.1	0.13006	0.862626
ENSG00000260645	AL359715.2	0.493284	0.573034
ENSG00000272129	AL359715.3	0.0662413	0.945611
ENSG00000284882	AL359762.1	0.235938	0.807362
ENSG00000282849	AL359834.1	-1.47999	2.63964e-08
ENSG00000205740	AL359878.1	-0.779128	0.417328
ENSG00000230325	AL359921.1	-0.0916342	0.952354
ENSG00000273058	AL359921.2	0.233186	0.706339
ENSG00000228417	AL360182.2	0.566375	0.583343
ENSG00000273264	AL360219.1	0.528586	0.647819
ENSG00000261654	AL360270.2	0.257866	0.70941
ENSG00000273010	AL360270.3	-0.656266	0.316917
ENSG00000272405	AL365181.3	0.0916855	0.88122
ENSG00000226919	AL365184.1	-0.184807	0.826205
ENSG00000237356	AL365295.1	0.748073	0.00104536
ENSG00000272153	AL365330.1	0.381216	0.627113
ENSG00000232536	AL365436.2	0.235545	0.860615
ENSG00000224950	AL390066.1	0.129273	0.87492
ENSG00000243960	AL390195.1	0.221842	0.815208
ENSG00000260948	AL390195.2	0.502651	0.218362
ENSG00000259865	AL390728.6	0.414762	0.311862
ENSG00000235749	AL390860.1	-0.131	0.923893
ENSG00000285280	AL390957.1	1.51588	0.00467601
ENSG00000269887	AL391001.1	0.00574147	0.996905
ENSG00000227619	AL391056.1	0.744992	0.00236532
ENSG00000224635	AL391095.1	-0.409734	0.396138
ENSG00000275401	AL391095.3	-0.178545	0.857008
ENSG00000250734	AL391335.1	-0.510394	0.578713
ENSG00000270504	AL391422.3	0.150645	0.408005
ENSG00000272842	AL391834.1	0.112785	0.920175
ENSG00000273226	AL391834.2	0.446559	0.369295
ENSG00000229502	AL391863.1	0.977978	0.115698
ENSG00000277879	AL391988.1	0.265026	0.524834
ENSG00000261071	AL441883.1	-0.0463993	0.951696
ENSG00000276248	AL442125.1	-0.122281	0.813636
ENSG00000276916	AL442125.2	0.745004	0.167842
ENSG00000277767	AL442128.2	0.534337	0.484435
ENSG00000232993	AL445183.1	0.879441	0.111897
ENSG00000235563	AL445183.2	1.58736	0.0039807
ENSG00000271833	AL445222.1	-0.255635	0.847254
ENSG00000269189	AL445223.1	-0.921751	0.295983
ENSG00000225096	AL445250.1	-0.112628	0.847863
ENSG00000272823	AL445423.1	0.884592	0.214207
ENSG00000242753	AL445430.2	0.674452	0.372198
ENSG00000227486	AL445472.1	0.093115	0.908663
ENSG00000233461	AL445524.1	0.683982	0.0151859
ENSG00000276740	AL445649.1	0.0138299	0.995352
ENSG00000231424	AL445673.1	0.323143	0.811662
ENSG00000223390	AL445685.1	0.0896962	0.92639
ENSG00000228741	AL445985.1	0.53577	0.193198
ENSG00000240291	AL450384.2	0.138727	0.867725
ENSG00000237938	AL450998.3	-0.126994	0.919594
ENSG00000282317	AL451007.2	-0.666375	0.574032
ENSG00000226900	AL451069.1	-0.0684179	0.934573
ENSG00000271380	AL451085.2	0.349035	0.397935
ENSG00000244137	AL512328.1	-1.07429	0.154033
ENSG00000283480	AL512380.2	0.261186	0.584515
ENSG00000260063	AL512408.1	-0.215511	0.736453
ENSG00000273107	AL512598.1	-0.146124	0.87043
ENSG00000233144	AL512656.1	-0.427194	0.623207
ENSG00000283913	AL512662.2	2.38404	0.0116823
ENSG00000228302	AL512770.1	-0.681111	0.457839
ENSG00000258424	AL512791.1	0.0623124	0.952207
ENSG00000234160	AL513165.1	-0.0360392	0.947812
ENSG00000278831	AL513190.1	0.212023	0.87492
ENSG00000223774	AL513217.1	0.49461	0.146983
ENSG00000272100	AL513218.1	-0.25538	0.830049
ENSG00000238260	AL513320.1	-0.310785	0.797354
ENSG00000270115	AL513327.3	0.365093	0.686704
ENSG00000272420	AL513477.2	0.303582	0.749268
ENSG00000260400	AL513534.1	0.126656	0.807634
ENSG00000258430	AL583722.2	0.0479024	0.941875
ENSG00000271967	AL583856.2	2.1229	0.00738101
ENSG00000224848	AL589843.1	0.231181	0.806249
ENSG00000260604	AL590004.4	0.0818925	0.774303
ENSG00000259357	AL590133.2	0.367241	0.365518
ENSG00000272668	AL590560.2	0.279706	0.540292
ENSG00000227885	AL590652.1	-0.00126108	0.998985
ENSG00000223356	AL590666.1	1.32006	0.139709
ENSG00000203279	AL590705.1	-0.323972	0.567862
ENSG00000224985	AL590714.1	0.430538	0.46343
ENSG00000260698	AL591848.3	-0.76811	0.135672
ENSG00000260855	AL591848.4	0.46736	0.171176
ENSG00000242861	AL591895.1	-0.140517	0.801088
ENSG00000261065	AL592146.1	-0.313148	0.827365
ENSG00000272750	AL592148.3	0.297983	0.465498
ENSG00000225721	AL592166.1	0.038897	0.91631
ENSG00000283696	AL592295.4	0.134433	0.876508
ENSG00000261168	AL592424.1	1.2511	0.0645042
ENSG00000232995	AL592435.1	0.297107	0.673026
ENSG00000272764	AL596094.1	0.84856	0.121661
ENSG00000235381	AL596202.1	-0.493057	0.198969
ENSG00000229261	AL596223.1	-1.16512	0.230135
ENSG00000272574	AL596325.2	-0.621096	0.288663
ENSG00000271933	AL603756.1	-0.738982	0.425598
ENSG00000230896	AL604028.1	0.128157	0.782003
ENSG00000225643	AL606491.1	0.44478	0.618121
ENSG00000236723	AL606760.2	0.355147	0.599163
ENSG00000281091	AL606763.1	0.345085	0.503984
ENSG00000269906	AL606834.1	0.45589	0.323344
ENSG00000270062	AL606834.2	-0.428969	0.527343
ENSG00000278002	AL627171.1	-0.0806961	0.927978
ENSG00000282885	AL627171.2	0.272138	0.493063
ENSG00000230699	AL645608.3	1.06502	0.024316
ENSG00000272438	AL645608.7	0.234767	0.859902
ENSG00000272512	AL645608.8	1.13308	0.0407951
ENSG00000215014	AL645728.1	0.345865	0.546904
ENSG00000272540	AL662797.1	-0.525738	0.325202
ENSG00000231563	AL670729.1	-0.692194	0.125152
ENSG00000273192	AL671710.1	-0.0598498	0.930748
ENSG00000235813	AL672032.1	-1.63421	0.0176297
ENSG00000232611	AL683813.1	0.141261	0.79865
ENSG00000273565	AL691403.2	0.838992	0.0264135
ENSG00000272106	AL691432.2	0.142179	0.715276
ENSG00000232063	AL691447.2	-0.344447	0.424318
ENSG00000237768	AL731563.2	0.319969	0.803318
ENSG00000272630	AL731563.3	0.893808	0.0124623
ENSG00000273891	AL731566.1	-0.77473	0.453469
ENSG00000276742	AL731566.2	0.105312	0.918705
ENSG00000273599	AL731571.1	0.523311	0.187588
ENSG00000249456	AL731577.2	-0.072226	0.886824
ENSG00000273416	AL732292.2	0.992125	0.115411
ENSG00000284116	AL772307.1	-0.028017	0.96518
ENSG00000260190	AL807752.5	-1.20492	0.0531552
ENSG00000273027	AL844908.2	-0.936233	0.230203
ENSG00000257270	AL928654.2	-0.891574	0.390792
ENSG00000237419	AL954642.1	-1.406	0.119748
ENSG00000259285	ALDH1A2-AS1	0.115472	0.915313
ENSG00000259583	ALDH1A3-AS1	0.0145162	0.977226
ENSG00000248671	ALG1L9P	0.0920875	0.933619
ENSG00000230002	ALMS1-IT1	0.067716	0.951818
ENSG00000215067	ALOX12-AS1	-0.12443	0.798149
ENSG00000291140	AMZ2P1	-0.09597	0.855296
ENSG00000249637	ANKHD1-DT	-0.0148374	0.992567
ENSG00000229152	ANKRD10-IT1	0.269449	0.45665
ENSG00000250220	ANKRD17-DT	0.138205	0.900174
ENSG00000247137	ANKRD42-DT	-0.0326002	0.957332
ENSG00000225905	ANKRD65-AS1	0.908402	0.418323
ENSG00000215068	ANXA2R-AS1	-0.038539	0.937624
ENSG00000177738	ANXA2R-OT1	-0.17563	0.667301
ENSG00000260583	AP000223.1	-0.712386	0.508939
ENSG00000273464	AP000238.1	0.27929	0.827472
ENSG00000273017	AP000240.1	-0.686289	0.321002
ENSG00000273271	AP000254.1	0.481589	0.310855
ENSG00000214955	AP000317.1	-0.800388	0.308921
ENSG00000225555	AP000320.1	0.755885	0.275584
ENSG00000272733	AP000345.2	-0.0623131	0.969303
ENSG00000211683	AP000346.1	-0.00181734	0.998997
ENSG00000255139	AP000442.2	-0.329243	0.688849
ENSG00000272872	AP000525.1	-0.292109	0.599809
ENSG00000283633	AP000547.3	-0.0438366	0.959934
ENSG00000207751	AP000553.1	-0.26391	0.851622
ENSG00000254477	AP000640.1	-0.850027	0.155175
ENSG00000269895	AP000654.1	-0.123534	0.90918
ENSG00000233393	AP000688.2	-0.885958	0.178164
ENSG00000228107	AP000692.1	0.242052	0.773988
ENSG00000273199	AP000692.2	-0.469829	0.480946
ENSG00000255537	AP000708.1	0.00357842	0.998675
ENSG00000255320	AP000759.1	0.0919495	0.935727
ENSG00000261098	AP000766.1	0.362604	0.453426
ENSG00000255959	AP000777.2	-0.353266	0.679775
ENSG00000254662	AP000781.1	-0.125933	0.827628
ENSG00000247416	AP000802.1	-0.0597184	0.941846
ENSG00000272788	AP000864.1	0.139959	0.882219
ENSG00000279342	AP000866.6	-0.148225	0.799109
ENSG00000254676	AP000873.4	0.0212301	0.986762
ENSG00000254721	AP000879.1	-0.285522	0.602171
ENSG00000276505	AP000892.2	0.0066604	0.99756
ENSG00000273355	AP000894.4	0.0765813	0.935154
ENSG00000265907	AP000919.2	-0.339725	0.728017
ENSG00000272625	AP000919.4	1.13729	0.105466
ENSG00000255176	AP000941.1	-0.425193	0.513698
ENSG00000254422	AP000942.2	-0.0650524	0.941762
ENSG00000264635	AP001020.2	-0.337204	0.672083
ENSG00000267108	AP001029.1	-0.171777	0.885254
ENSG00000267199	AP001029.2	0.793292	0.048548
ENSG00000273284	AP001033.2	0.541304	0.369664
ENSG00000285413	AP001056.2	3.17041	0.000795798
ENSG00000232124	AP001057.1	0.412406	0.584447
ENSG00000184441	AP001062.1	0.484996	0.0543489
ENSG00000265413	AP001094.2	-0.521848	0.49929
ENSG00000245156	AP001107.1	0.0637913	0.924319
ENSG00000254452	AP001107.2	0.375851	0.451555
ENSG00000254461	AP001107.4	-0.270527	0.815056
ENSG00000254510	AP001107.5	0.199514	0.595072
ENSG00000254756	AP001107.6	-0.555305	0.472183
ENSG00000267811	AP001160.2	0.0343379	0.957039
ENSG00000269176	AP001160.3	0.221971	0.629536
ENSG00000269463	AP001160.4	-0.30642	0.799875
ENSG00000236304	AP001189.1	-2.09468	0.0184972
ENSG00000254810	AP001189.3	-0.987645	0.00117294
ENSG00000254873	AP001267.1	-0.472118	0.721659
ENSG00000271882	AP001330.5	-0.129114	0.830752
ENSG00000224905	AP001347.1	1.49651	9.51446e-07
ENSG00000269570	AP001350.1	-0.454811	0.23173
ENSG00000257058	AP001363.2	-0.878083	0.44034
ENSG00000272948	AP001412.1	0.147566	0.878289
ENSG00000270116	AP001429.1	0.275232	0.83225
ENSG00000273210	AP001437.1	-0.347149	0.727547
ENSG00000256116	AP001453.1	-0.443095	0.332432
ENSG00000257086	AP001453.4	-0.109265	0.823604
ENSG00000228137	AP001469.2	-1.03063	0.233477
ENSG00000239415	AP001469.3	-0.196343	0.861218
ENSG00000224413	AP001476.1	-1.22582	0.00193963
ENSG00000276529	AP001505.1	0.406843	0.424318
ENSG00000277459	AP001527.2	0.460451	0.32273
ENSG00000227698	AP001619.1	0.478773	0.692503
ENSG00000254990	AP001781.1	2.54519	0.00116547
ENSG00000266708	AP001793.1	0.761558	0.102593
ENSG00000254531	AP001816.1	-0.0154635	0.976804
ENSG00000254694	AP001893.1	-0.0736371	0.936418
ENSG00000255326	AP001922.5	0.308056	0.675887
ENSG00000246090	AP002026.1	1.10153	5.92238e-06
ENSG00000254604	AP002336.2	-0.706406	0.546308
ENSG00000254682	AP002387.2	-0.156683	0.762522
ENSG00000255467	AP002433.1	-0.232481	0.811701
ENSG00000251143	AP002490.1	-0.227064	0.472157
ENSG00000256034	AP002770.1	0.331985	0.373503
ENSG00000250519	AP002784.1	-0.342983	0.405787
ENSG00000255031	AP002807.1	0.565975	0.039521
ENSG00000254459	AP002812.2	0.248407	0.861218
ENSG00000255449	AP002812.5	0.0235093	0.989043
ENSG00000270179	AP002840.2	0.330989	0.532092
ENSG00000283959	AP002851.1	0.118002	0.848978
ENSG00000255345	AP002957.1	-0.190271	0.8845
ENSG00000254501	AP003068.1	0.220369	0.757526
ENSG00000255173	AP003068.3	1.02044	0.166335
ENSG00000261276	AP003071.3	1.29711	0.000384738
ENSG00000261625	AP003071.4	0.973206	1.11836e-06
ENSG00000260808	AP003096.1	0.373819	0.717491
ENSG00000261578	AP003119.3	2.27841	3.45677e-35
ENSG00000255114	AP003392.3	0.209119	0.797038
ENSG00000271751	AP003392.5	-0.138545	0.922849
ENSG00000245385	AP003396.1	-0.234238	0.793852
ENSG00000275484	AP003419.3	0.0609649	0.96686
ENSG00000278376	AP004609.3	-0.0725655	0.908904
ENSG00000266783	AP005136.2	-0.150616	0.862258
ENSG00000260877	AP005233.2	-2.24813	4.72223e-10
ENSG00000267069	AP005264.1	0.277918	0.684126
ENSG00000272688	AP005329.3	0.343557	0.443962
ENSG00000273335	AP005432.2	0.815024	0.371862
ENSG00000267249	AP005482.3	0.470253	0.311664
ENSG00000255038	AP006287.2	-0.423401	0.626072
ENSG00000260949	AP006545.1	0.443334	0.262106
ENSG00000255108	AP006621.1	0.751899	0.0299225
ENSG00000255142	AP006621.2	-1.19871	0.00976872
ENSG00000250397	AP006623.1	0.323171	0.742893
ENSG00000260526	AP1AR-DT	0.292708	0.629649
ENSG00000258727	AP1G2-AS1	0.275807	0.345567
ENSG00000231290	APCDD1L-DT	-1.34538	8.284e-05
ENSG00000230606	APPAT	0.672357	0.311862
ENSG00000259349	APPBP2-DT	0.60779	0.279991
ENSG00000273492	APP-DT	-0.704217	0.539492
ENSG00000198590	APRG1	0.0871288	0.925843
ENSG00000214293	APTR	0.166471	0.585447
ENSG00000256007	ARAP1-AS1	-0.273202	0.792367
ENSG00000245148	ARAP1-AS2	0.289595	0.757668
ENSG00000272146	ARF4-AS1	0.0845924	0.932556
ENSG00000271966	ARFGEF1-DT	-0.43321	0.548107
ENSG00000215769	ARHGAP27P1-BPTFP1-KPNA2P3	0.272188	0.626253
ENSG00000266441	ARHGAP28-AS1	1.18761	0.0452068
ENSG00000226835	ARHGAP29-AS1	-0.701271	0.500423
ENSG00000241155	ARHGAP31-AS1	0.898526	0.281772
ENSG00000258655	ARHGAP5-AS1	0.89407	0.000321659
ENSG00000257038	ARHGEF17-AS1	0.23566	0.499248
ENSG00000273002	ARHGEF2-AS2	0.626176	0.304059
ENSG00000244198	ARHGEF35-AS1	-0.40872	0.322384
ENSG00000235875	ARHGEF7-AS2	1.35852	0.0117602
ENSG00000221883	ARIH2OS	0.238649	0.663032
ENSG00000260896	ARLNC1	-1.51564	0.124178
ENSG00000228275	ARMCX3-AS1	0.282192	0.66741
ENSG00000271147	ARMCX5-GPRASP2	0.0113601	0.984824
ENSG00000259495	ARNT2-DT	0.816095	0.157736
ENSG00000203993	ARRDC1-AS1	-0.0126795	0.975899
ENSG00000281357	ARRDC3-AS1	-0.165933	0.807645
ENSG00000229851	ARSD-AS1	0.433632	0.601166
ENSG00000245281	ASAH1-AS1	0.114019	0.881439
ENSG00000280543	ASAP1-IT2	-0.373121	0.67557
ENSG00000267080	ASB16-AS1	0.0335431	0.934034
ENSG00000235919	ASH1L-AS1	-0.183598	0.757526
ENSG00000226889	ATF6-DT	-0.162483	0.798167
ENSG00000233058	ATP13A3-DT	-0.73176	0.0522286
ENSG00000203865	ATP1A1-AS1	0.209158	0.598328
ENSG00000260442	ATP2A1-AS1	-0.312479	0.619161
ENSG00000271614	ATP2B1-AS1	-0.861959	0.00175717
ENSG00000261286	ATP2C2-AS1	0.118818	0.876599
ENSG00000197180	ATP6AP1-DT	-0.270987	0.508318
ENSG00000270049	ATP6V0D1-DT	-0.0123792	0.986563
ENSG00000204934	ATP6V0E2-AS1	0.326267	0.366099
ENSG00000267040	ATP8B1-AS1	0.0326112	0.955882
ENSG00000229931	ATXN1-AS1	0.304177	0.353741
ENSG00000258099	ATXN2-AS	-0.0716608	0.951482
ENSG00000267394	ATXN7L3-AS1	-0.106523	0.923716
ENSG00000184809	B3GALT5-AS1	1.8889	0.000246029
ENSG00000233554	B4GALT1-AS1	0.289878	0.492348
ENSG00000255468	B4GAT1-DT	-0.000179861	0.999654
ENSG00000247081	BAALC-AS1	-0.118988	0.760986
ENSG00000278768	BACE1-AS	0.0107881	0.985964
ENSG00000248476	BACH1-IT1	-0.726384	0.129209
ENSG00000228817	BACH1-IT2	-0.384777	0.733827
ENSG00000226137	BAIAP2-DT	-0.0948263	0.694736
ENSG00000215196	BASP1-AS1	2.75555	4.93889e-21
ENSG00000258738	BAZ1A-AS1	-0.143203	0.702133
ENSG00000224152	BAZ2B-AS1	0.201577	0.638616
ENSG00000254560	BBOX1-AS1	0.879027	0.381941
ENSG00000272068	BCAN-AS1	0.450899	0.723943
ENSG00000229953	BCAN-AS2	0.0487715	0.95528
ENSG00000224093	BCAR3-AS1	0.428855	0.718169
ENSG00000258057	BCDIN3D-AS1	0.161641	0.780333
ENSG00000223653	BCL10-AS1	-0.0796926	0.925781
ENSG00000245573	BDNF-AS	0.302487	0.436349
ENSG00000235831	BHLHE40-AS1	0.166058	0.764724
ENSG00000282851	BISPR	0.694792	0.0820772
ENSG00000260278	BMP2K-DT	-0.138408	0.883595
ENSG00000271816	BMS1P4	0.126551	0.877131
ENSG00000234779	BNC2-AS1	0.187642	0.744285
ENSG00000234235	BOK-AS1	0.297859	0.534783
ENSG00000225439	BOLA3-DT	-0.175527	0.591884
ENSG00000246982	BRPF3-AS1	0.317867	0.655332
ENSG00000255568	BRWD1-AS2	-1.00986	0.120083
ENSG00000267751	BSG-AS1	0.197156	0.773144
ENSG00000236526	BTBD3-AS1	-0.296567	0.737625
ENSG00000272525	BTF3-DT	0.15612	0.904379
ENSG00000245904	BTG1-DT	0.985698	0.00306528
ENSG00000291104	BTN2A3P	0.012368	0.985077
ENSG00000203808	BVES-AS1	0.584254	0.206576
ENSG00000225655	BX255923.1	-0.0232436	0.986406
ENSG00000238142	BX284668.5	0.314271	0.499028
ENSG00000233085	BX322234.2	0.0360186	0.981724
ENSG00000273796	BX322562.1	0.771995	0.0579411
ENSG00000284652	BX323043.1	1.04977	0.00172647
ENSG00000273175	BX323046.1	-0.104331	0.732727
ENSG00000238279	BX470102.1	0.315323	0.712428
ENSG00000273145	BX537318.1	0.54372	0.208563
ENSG00000278869	BX539320.1	0.440201	0.454542
ENSG00000230408	BZW1-AS1	0.308802	0.729117
ENSG00000222047	C10orf55	-0.573207	0.101346
ENSG00000224215	C10orf67-AS1	-0.0223658	0.987349
ENSG00000269609	C10orf95-AS1	-0.00291992	0.99756
ENSG00000257642	C12orf75-AS1	-0.978319	0.00618641
ENSG00000270006	C16orf95-DT	0.119036	0.896595
ENSG00000213057	C1orf220	-0.508565	0.317807
ENSG00000265096	C1QTNF1-AS1	1.80527	0.00926496
ENSG00000205885	C1RL-AS1	-0.149166	0.699138
ENSG00000234614	C2CD4D-AS1	0.298855	0.781809
ENSG00000287151	C2orf27A	-0.958203	8.28605e-07
ENSG00000272994	C2orf49-DT	0.146694	0.791572
ENSG00000212978	C2orf74-DT	0.0596593	0.848054
ENSG00000288547	C3orf36	-3.2657	0.000835539
ENSG00000248554	C5orf34-AS1	0.282129	0.811325
ENSG00000248801	C8orf34-AS1	0.789815	0.34101
ENSG00000288596	C8orf44	0.082314	0.877332
ENSG00000196366	C9orf163	0.611007	0.307962
ENSG00000246627	CACNA1C-AS1	-0.112284	0.905168
ENSG00000256271	CACNA1C-AS2	0.114443	0.940616
ENSG00000226800	CACTIN-AS1	0.00137375	0.998675
ENSG00000270419	CAHM	-0.33094	0.598104
ENSG00000224063	CALCRL-AS1	0.249082	0.70402
ENSG00000238058	CAMSAP1-DT	-0.382399	0.369295
ENSG00000237436	CAMTA1-DT	0.407666	0.725787
ENSG00000262678	CAMTA2-AS1	0.0748347	0.955686
[truncated: 2,628 more rows]

## Sheet: S5
Gene stable ID	HGNC symbol	Log2FC(EPC vs VEH)	FDR
ENSG00000268895	A1BG-AS1	0.331528	0.118459
ENSG00000245105	A2M-AS1	0.125259	0.881688
ENSG00000242908	AADACL2-AS1	-0.36828	0.770528
ENSG00000215458	AATBC	-0.944556	0.282829
ENSG00000254180	AB015752.1	0.47582	0.751572
ENSG00000281376	ABALON	-0.447422	0.24597
ENSG00000273212	AC000068.2	0.159333	0.829721
ENSG00000243107	AC000120.1	0.29655	0.827875
ENSG00000278727	AC000403.1	-0.730016	0.107348
ENSG00000237813	AC002066.1	-0.695369	0.395674
ENSG00000248636	AC002070.1	0.669657	0.514522
ENSG00000285090	AC002074.1	0.514524	0.180578
ENSG00000265618	AC002094.2	-0.0149931	0.998329
ENSG00000277450	AC002094.4	0.307935	0.816978
ENSG00000248101	AC002116.1	0.316188	0.736723
ENSG00000267698	AC002116.2	-0.345122	0.666039
ENSG00000239791	AC002310.2	-0.850854	0.177907
ENSG00000267328	AC002398.2	0.397299	0.0859909
ENSG00000236472	AC002401.1	-0.170025	0.82735
ENSG00000276851	AC002401.4	-0.863867	0.219661
ENSG00000223969	AC002456.1	1.01034	0.00885416
ENSG00000272829	AC002470.1	0.28557	0.74794
ENSG00000232949	AC002480.3	-3.40606	0.00560244
ENSG00000259810	AC002519.1	0.968575	0.456569
ENSG00000261312	AC002550.1	-0.402261	0.662175
ENSG00000276571	AC002550.2	0.255455	0.765536
ENSG00000227782	AC002553.1	-0.634211	0.688411
ENSG00000275413	AC002553.2	-0.443158	0.787257
ENSG00000262265	AC002558.3	0.477996	0.562284
ENSG00000268266	AC003005.2	0.0811377	0.962813
ENSG00000236453	AC003092.1	0.044193	0.953765
ENSG00000260793	AC003102.1	0.284422	0.652064
ENSG00000279159	AC003681.1	-0.442641	0.245014
ENSG00000268392	AC003682.1	-0.191335	0.891568
ENSG00000236536	AC003986.3	-0.577282	0.459085
ENSG00000237903	AC004000.1	-0.225556	0.90251
ENSG00000273447	AC004067.1	1.03532	0.313105
ENSG00000251259	AC004069.1	0.466537	0.804239
ENSG00000276449	AC004076.2	-0.0149015	0.991922
ENSG00000253508	AC004080.2	0.352864	0.600134
ENSG00000263272	AC004148.2	-0.276712	0.708096
ENSG00000267666	AC004156.1	-0.648855	0.391949
ENSG00000230333	AC004160.1	3.19739	9.52358e-13
ENSG00000230435	AC004160.2	1.68123	0.135964
ENSG00000274902	AC004241.2	0.0326985	0.987284
ENSG00000276390	AC004241.3	-0.355631	0.626486
ENSG00000261204	AC004449.1	-0.0330712	0.993003
ENSG00000268069	AC004466.1	0.839985	0.0765908
ENSG00000274737	AC004466.2	-0.0691569	0.953936
ENSG00000266341	AC004477.2	0.192735	0.747103
ENSG00000278765	AC004477.3	-0.464072	0.61832
ENSG00000267122	AC004490.1	-0.250111	0.910253
ENSG00000272072	AC004492.1	0.0454374	0.973086
ENSG00000262312	AC004494.1	0.234403	0.842781
ENSG00000274177	AC004528.2	0.135293	0.857552
ENSG00000269972	AC004542.1	0.939946	0.550701
ENSG00000269987	AC004542.2	0.109047	0.944314
ENSG00000263120	AC004584.3	-1.02131	0.403322
ENSG00000266088	AC004585.1	3.72704	6.46674e-06
ENSG00000253102	AC004707.1	0.497293	0.150557
ENSG00000234203	AC004771.2	-0.145494	0.903503
ENSG00000262227	AC004771.3	0.19255	0.716918
ENSG00000262429	AC004771.4	-0.601232	0.273693
ENSG00000250132	AC004803.1	0.212569	0.559971
ENSG00000269927	AC004817.3	4.7155	0.00658551
ENSG00000274818	AC004825.2	0.283915	0.621615
ENSG00000272689	AC004832.4	0.00331403	0.999231
ENSG00000273350	AC004832.5	0.234611	0.886601
ENSG00000284523	AC004834.1	-1.84755	0.212146
ENSG00000272854	AC004839.1	-0.633373	0.705769
ENSG00000258944	AC004846.2	1.12514	0.168548
ENSG00000272768	AC004854.2	-0.318177	0.436902
ENSG00000273419	AC004877.1	-0.191635	0.825442
ENSG00000272812	AC004908.2	-0.541291	0.42318
ENSG00000273402	AC004908.3	0.855905	0.399761
ENSG00000243797	AC004917.1	-2.10861	5.17068e-05
ENSG00000255306	AC004923.4	-0.827223	0.546962
ENSG00000259209	AC004943.1	-0.735534	0.58427
ENSG00000228434	AC004951.1	-0.644966	0.282774
ENSG00000273432	AC004951.4	0.0737407	0.953682
ENSG00000272732	AC004982.1	-0.141475	0.937768
ENSG00000273387	AC005005.3	-0.0956853	0.891978
ENSG00000272361	AC005014.2	-0.547498	0.549838
ENSG00000270996	AC005034.4	-0.00757902	0.999178
ENSG00000271452	AC005034.5	-0.182681	0.748905
ENSG00000183308	AC005037.1	0.322626	0.816538
ENSG00000272183	AC005041.3	-0.209289	0.925688
ENSG00000273055	AC005046.1	-0.00894908	0.999169
ENSG00000267052	AC005050.1	-1.53583	0.00219901
ENSG00000243004	AC005062.1	1.03533	0.0398335
ENSG00000272918	AC005070.3	0.0165329	0.992655
ENSG00000272219	AC005072.1	0.409577	0.806308
ENSG00000226816	AC005082.1	-0.292857	0.743508
ENSG00000223374	AC005104.1	0.720028	0.49273
ENSG00000267405	AC005180.1	0.266107	0.802719
ENSG00000266709	AC005224.4	0.45769	0.432102
ENSG00000258603	AC005225.2	0.948435	0.46465
ENSG00000258695	AC005225.3	0.88685	0.485091
ENSG00000273314	AC005229.4	0.015824	0.980311
ENSG00000268030	AC005253.1	0.222151	0.752895
ENSG00000268205	AC005261.1	0.167307	0.517047
ENSG00000267139	AC005262.2	0.341267	0.59549
ENSG00000263707	AC005277.1	0.00465897	0.999231
ENSG00000266469	AC005288.1	0.348021	0.525859
ENSG00000273388	AC005291.2	0.60893	0.736194
ENSG00000267283	AC005306.1	-0.100489	0.895845
ENSG00000248015	AC005329.1	-0.37871	0.425413
ENSG00000267755	AC005329.2	-1.23536	0.255743
ENSG00000280486	AC005329.3	-0.192734	0.770051
ENSG00000267731	AC005332.3	0.347334	0.869015
ENSG00000274561	AC005332.4	-0.165558	0.745965
ENSG00000277476	AC005332.6	-0.485742	0.0868872
ENSG00000278730	AC005332.7	-0.328456	0.0128214
ENSG00000268565	AC005339.1	-0.469988	0.56905
ENSG00000203593	AC005342.1	1.15165	0.485239
ENSG00000250994	AC005355.1	-0.0102168	0.998329
ENSG00000277602	AC005363.2	-0.959105	0.497792
ENSG00000275024	AC005383.1	-1.59662	0.239466
ENSG00000268938	AC005387.1	-0.126623	0.919261
ENSG00000275162	AC005391.1	-0.808798	0.52467
ENSG00000276445	AC005393.1	0.102068	0.939429
ENSG00000266368	AC005410.1	-0.245189	0.883416
ENSG00000259005	AC005479.1	-0.0729886	0.933709
ENSG00000270000	AC005479.2	-0.133242	0.895886
ENSG00000222012	AC005481.1	0.0785635	0.966496
ENSG00000258559	AC005519.1	-0.029294	0.967753
ENSG00000273711	AC005520.5	-0.80701	0.322991
ENSG00000269604	AC005523.2	-0.156754	0.796382
ENSG00000235852	AC005540.1	-0.13453	0.789434
ENSG00000266897	AC005546.1	-0.512147	0.609059
ENSG00000214719	AC005562.1	-0.265984	0.485385
ENSG00000261305	AC005586.2	-0.370842	0.510381
ENSG00000261757	AC005592.1	-0.694655	0.639515
ENSG00000260107	AC005606.1	0.0805443	0.925472
ENSG00000261790	AC005606.2	0.275001	0.750619
ENSG00000279726	AC005609.5	-1.03891	0.50892
ENSG00000272070	AC005618.1	-0.10114	0.867707
ENSG00000261596	AC005632.2	-0.00868155	0.998329
ENSG00000262050	AC005696.1	0.990826	0.0348531
ENSG00000272770	AC005696.2	0.217418	0.917515
ENSG00000272911	AC005696.3	-1.32052	0.259594
ENSG00000264044	AC005726.2	-0.0568634	0.954886
ENSG00000265168	AC005726.4	0.104704	0.952083
ENSG00000271871	AC005740.4	-0.107967	0.950951
ENSG00000266934	AC005746.1	-0.0582141	0.965479
ENSG00000267131	AC005746.2	0.00646125	0.998633
ENSG00000268650	AC005759.1	-0.652181	0.409134
ENSG00000267436	AC005786.3	0.168792	0.743325
ENSG00000267090	AC005789.1	0.816512	0.591987
ENSG00000274447	AC005790.1	-0.169764	0.892466
ENSG00000265702	AC005821.1	1.36366	0.148108
ENSG00000265282	AC005828.4	-1.21682	0.459453
ENSG00000265971	AC005828.5	2.4699	0.000326303
ENSG00000261335	AC005837.1	-0.650558	0.496809
ENSG00000277382	AC005837.3	-0.685076	0.602974
ENSG00000266538	AC005838.2	0.584228	0.4601
ENSG00000256433	AC005840.2	-0.30545	0.7361
ENSG00000258092	AC005841.1	-0.600182	0.323488
ENSG00000255775	AC005845.1	0.04052	0.990209
ENSG00000258114	AC005871.2	0.820339	0.487473
ENSG00000266385	AC005899.5	-0.239391	0.869106
ENSG00000274341	AC005899.6	0.143882	0.922457
ENSG00000278668	AC005899.7	0.539495	0.57337
ENSG00000279762	AC005899.8	0.107179	0.906461
ENSG00000278356	AC005911.1	-0.608641	0.532527
ENSG00000262967	AC005921.2	-0.123686	0.921107
ENSG00000267469	AC005944.1	0.464963	0.0783897
ENSG00000267138	AC005954.1	0.694196	0.383153
ENSG00000267205	AC005954.2	-0.970403	0.401712
ENSG00000278627	AC005962.1	-0.918374	0.52023
ENSG00000283538	AC005972.4	0.450716	0.371814
ENSG00000226824	AC006001.2	0.052018	0.934001
ENSG00000229591	AC006017.1	0.449903	0.724135
ENSG00000234286	AC006026.3	0.84401	0.40657
ENSG00000272638	AC006027.1	1.73199	0.258312
ENSG00000272908	AC006033.2	-1.47535	0.160851
ENSG00000234141	AC006042.4	0.13052	0.927797
ENSG00000261786	AC006058.1	-0.28881	0.642105
ENSG00000272121	AC006058.3	-0.607329	0.572259
ENSG00000247853	AC006064.2	0.0985421	0.873685
ENSG00000269968	AC006064.4	0.0999212	0.678063
ENSG00000263235	AC006111.2	1.00828	0.380816
ENSG00000264895	AC006141.1	-0.414813	0.735019
ENSG00000243574	AC006148.2	-1.64941	0.318439
ENSG00000256417	AC006206.2	-1.43546	0.258133
ENSG00000267058	AC006213.2	0.322412	0.402256
ENSG00000277806	AC006213.4	-0.0326931	0.971012
ENSG00000278492	AC006213.5	1.03363	0.101113
ENSG00000274578	AC006249.1	0.605025	0.634394
ENSG00000272473	AC006273.1	0.961652	0.0605495
ENSG00000246225	AC006299.1	1.52812	0.270892
ENSG00000234210	AC006372.3	-0.679201	0.681344
ENSG00000262456	AC006435.1	0.533257	0.488665
ENSG00000265784	AC006441.3	0.140345	0.809121
ENSG00000228509	AC006460.1	0.351919	0.704749
ENSG00000284052	AC006460.2	0.348304	0.635254
ENSG00000273448	AC006480.2	0.359722	0.632806
ENSG00000272719	AC006483.2	0.610755	0.72089
ENSG00000261770	AC006504.1	-0.263052	0.583988
ENSG00000281468	AC006504.8	0.292604	0.583768
ENSG00000261342	AC006538.1	-0.155944	0.765371
ENSG00000236540	AC006547.1	1.08905	0.51727
ENSG00000243762	AC006547.2	-0.00222588	0.999231
ENSG00000268292	AC006547.3	-0.0534884	0.963969
ENSG00000273368	AC006566.1	0.115582	0.934001
ENSG00000269194	AC006942.1	1.44033	0.0167748
ENSG00000273203	AC006946.2	-0.738342	0.436902
ENSG00000267055	AC007001.1	1.07123	0.360071
ENSG00000274038	AC007014.2	0.932979	0.559801
ENSG00000273320	AC007032.1	0.0527419	0.962567
ENSG00000272807	AC007038.2	0.752376	0.325152
ENSG00000261094	AC007066.2	0.127399	0.825934
ENSG00000283549	AC007161.3	-0.791638	0.649445
ENSG00000269151	AC007193.3	-0.571096	0.345566
ENSG00000260488	AC007216.1	-0.937151	0.552399
ENSG00000261560	AC007216.3	0.324278	0.67137
ENSG00000284959	AC007262.2	0.329197	0.811809
ENSG00000267980	AC007292.1	0.0440204	0.952045
ENSG00000269318	AC007292.2	0.497181	0.548673
ENSG00000269807	AC007292.3	-0.65547	0.73797
ENSG00000272600	AC007308.1	0.186561	0.891978
ENSG00000234818	AC007314.1	-0.0906764	0.938807
ENSG00000261997	AC007336.1	0.307795	0.673405
ENSG00000225216	AC007362.1	0.981063	0.042015
ENSG00000226756	AC007365.1	2.07667	0.0285304
ENSG00000273090	AC007378.1	-0.184746	0.752766
ENSG00000231955	AC007383.3	0.914888	0.521933
ENSG00000281920	AC007389.5	0.414746	0.707216
ENSG00000272054	AC007390.2	-0.25343	0.660003
ENSG00000235934	AC007405.2	-0.323854	0.772906
ENSG00000261799	AC007406.5	0.0447834	0.923338
ENSG00000283240	AC007529.2	0.41777	0.572693
ENSG00000277595	AC007546.1	0.614942	0.582689
ENSG00000256564	AC007552.2	-0.583186	0.695888
ENSG00000244055	AC007566.1	0.395757	0.262157
ENSG00000255655	AC007570.1	0.205627	0.816309
ENSG00000260086	AC007611.1	-0.122994	0.844552
ENSG00000255670	AC007619.1	2.15244	0.109962
ENSG00000242539	AC007620.2	0.292395	0.756309
ENSG00000256139	AC007637.1	0.801543	0.0827233
ENSG00000273139	AC007663.3	-0.0523219	0.969001
ENSG00000273343	AC007663.4	-0.789677	0.232278
ENSG00000270571	AC007681.1	-0.352996	0.784931
ENSG00000273035	AC007684.1	0.469633	0.801379
ENSG00000273729	AC007686.3	-0.115491	0.810122
ENSG00000233251	AC007743.1	1.01834	0.000587299
ENSG00000236841	AC007750.1	0.490752	0.451383
ENSG00000267009	AC007780.1	1.43281	0.0133514
ENSG00000268401	AC007785.3	-0.0839149	0.951974
ENSG00000260743	AC007823.1	0.456743	0.336183
ENSG00000281195	AC007878.1	-0.258923	0.682903
ENSG00000225916	AC007879.2	-0.629612	0.484873
ENSG00000234902	AC007879.3	-0.0174717	0.993564
ENSG00000240440	AC007879.4	0.0638024	0.980347
ENSG00000272735	AC007881.3	0.822357	0.376686
ENSG00000261291	AC007906.1	1.48978	0.28489
ENSG00000283175	AC007920.2	0.848357	6.30451e-05
ENSG00000266877	AC007923.4	0.0335884	0.991282
ENSG00000259920	AC007938.1	-0.94598	0.293224
ENSG00000270823	AC007938.2	-0.418401	0.461408
ENSG00000270953	AC007938.3	-0.244068	0.650347
ENSG00000276651	AC007950.2	0.606482	0.605461
ENSG00000228157	AC007952.2	0.599302	0.363022
ENSG00000225790	AC007953.1	0.618236	0.407861
ENSG00000277534	AC007996.1	0.120492	0.803372
ENSG00000257042	AC008011.2	-0.0902138	0.965328
ENSG00000272369	AC008035.1	0.161535	0.833045
ENSG00000233397	AC008063.2	1.76262	0.0971908
ENSG00000280007	AC008079.2	1.50152	0.282274
ENSG00000258181	AC008083.2	-0.120754	0.904923
ENSG00000276454	AC008083.3	-0.672841	0.686092
ENSG00000255649	AC008114.1	1.64806	0.208507
ENSG00000275963	AC008115.4	0.336858	0.83487
ENSG00000274156	AC008121.2	0.860385	0.525859
ENSG00000257298	AC008147.2	0.703699	0.0113426
ENSG00000258177	AC008149.1	0.75437	0.412921
ENSG00000273489	AC008264.2	0.607009	0.66551
ENSG00000229321	AC008269.1	0.428294	0.492547
ENSG00000223642	AC008277.1	0.56869	0.774941
ENSG00000272156	AC008280.3	0.375618	0.442861
ENSG00000268530	AC008403.2	-0.178889	0.815799
ENSG00000254295	AC008429.3	0.715407	0.540359
ENSG00000249655	AC008434.1	-0.686144	0.683169
ENSG00000232220	AC008440.2	0.763552	0.0117664
ENSG00000233937	AC008443.1	0.313706	0.348583
ENSG00000247049	AC008443.2	-0.128938	0.888036
ENSG00000248103	AC008443.3	0.0992481	0.962002
ENSG00000253660	AC008464.1	-1.04344	0.0139162
ENSG00000249476	AC008467.1	-0.106342	0.893606
ENSG00000271797	AC008494.3	-0.688607	0.157501
ENSG00000279232	AC008522.1	-1.71838	4.5057e-10
ENSG00000282951	AC008537.4	0.213536	0.919104
ENSG00000197332	AC008543.1	0.484587	0.617907
ENSG00000266922	AC008543.3	0.531073	0.790379
ENSG00000267379	AC008569.1	0.0791332	0.920335
ENSG00000267474	AC008569.2	-0.126465	0.927061
ENSG00000248634	AC008588.1	0.359136	0.842153
ENSG00000250362	AC008592.1	0.375701	0.734793
ENSG00000271737	AC008608.2	-0.191579	0.751572
ENSG00000248367	AC008610.1	0.514674	0.538535
ENSG00000275719	AC008622.2	0.111409	0.762315
ENSG00000269487	AC008635.1	-0.206815	0.799991
ENSG00000269392	AC008655.2	2.07493	0.121173
ENSG00000248544	AC008676.1	-1.81977	0.0817413
ENSG00000267633	AC008686.1	-0.188698	0.880551
ENSG00000268108	AC008687.2	1.35011	0.254026
ENSG00000253357	AC008708.1	-0.880407	0.212945
ENSG00000268743	AC008737.1	0.634595	0.511144
ENSG00000267650	AC008742.1	0.129793	0.935857
ENSG00000267024	AC008747.1	1.95168	0.161657
ENSG00000267984	AC008750.4	0.101901	0.889012
ENSG00000268520	AC008750.5	1.07058	0.36711
ENSG00000268112	AC008761.1	0.0793279	0.935248
ENSG00000268309	AC008764.3	1.19453	0.10255
ENSG00000269399	AC008764.6	0.00193839	0.999178
ENSG00000279529	AC008764.8	0.0176633	0.985527
ENSG00000267274	AC008770.3	0.0932857	0.937684
ENSG00000273557	AC008781.3	0.464467	0.759884
ENSG00000250240	AC008840.1	-0.550937	0.109402
ENSG00000260751	AC008870.2	-0.24016	0.699168
ENSG00000271788	AC008875.1	0.9472	0.12433
ENSG00000269371	AC008878.4	0.0850473	0.907391
ENSG00000269243	AC008894.2	0.0369387	0.959614
ENSG00000248734	AC008906.1	0.856345	0.283526
ENSG00000272109	AC008906.2	-0.456443	0.626336
ENSG00000262211	AC008914.1	0.94462	0.0776555
ENSG00000259782	AC008915.1	0.00310622	0.999231
ENSG00000260136	AC008915.2	0.266899	0.520085
ENSG00000271828	AC008937.3	0.374787	0.748747
ENSG00000267939	AC008946.1	0.577319	0.429441
ENSG00000272123	AC008966.2	-0.0509986	0.987426
ENSG00000176593	AC008969.1	0.311557	0.346995
ENSG00000271926	AC008972.1	-0.0617772	0.959614
ENSG00000269688	AC008982.2	0.788025	0.152293
ENSG00000196696	AC009022.1	0.433054	0.341031
ENSG00000274093	AC009032.1	0.0882018	0.936705
ENSG00000276931	AC009041.4	-0.10663	0.884632
ENSG00000261079	AC009053.2	-0.198671	0.870092
ENSG00000261783	AC009054.2	-0.21527	0.752571
ENSG00000247228	AC009060.1	1.10272	0.0664295
ENSG00000259780	AC009065.1	0.386841	0.616874
ENSG00000261123	AC009065.5	-1.30491	0.0426018
ENSG00000261240	AC009065.6	0.563307	0.612414
ENSG00000261532	AC009065.7	-0.713903	0.62607
ENSG00000260060	AC009088.1	-0.180599	0.932324
ENSG00000260304	AC009088.2	-0.40594	0.51036
ENSG00000260038	AC009090.1	0.0129434	0.996061
ENSG00000276663	AC009090.3	-0.0119899	0.998588
ENSG00000259807	AC009093.1	-0.550868	0.0518687
ENSG00000284685	AC009093.10	-0.356761	0.844182
ENSG00000261513	AC009097.4	0.419284	0.527958
ENSG00000260927	AC009107.2	0.463428	0.375787
ENSG00000270020	AC009108.3	0.496082	0.576863
ENSG00000276131	AC009118.2	0.332198	0.837268
ENSG00000259972	AC009120.2	0.049518	0.923163
ENSG00000275236	AC009120.5	0.642575	0.70317
ENSG00000263080	AC009121.2	-1.22568	0.312268
ENSG00000247121	AC009126.1	-0.0993151	0.880691
ENSG00000261765	AC009127.1	0.256063	0.869764
ENSG00000259952	AC009133.2	-0.305267	0.39532
ENSG00000275857	AC009133.4	0.749288	0.420323
ENSG00000260999	AC009137.1	0.314853	0.883968
ENSG00000266801	AC009137.2	-1.5016	0.282003
ENSG00000260495	AC009148.1	0.194025	0.828854
ENSG00000261476	AC009163.3	0.165479	0.925626
ENSG00000274220	AC009163.7	-0.377476	0.500401
ENSG00000261238	AC009166.1	0.944121	0.161022
ENSG00000263105	AC009171.2	0.395977	0.813393
ENSG00000223725	AC009226.1	0.0229495	0.991295
ENSG00000242628	AC009228.1	0.12096	0.937944
ENSG00000273305	AC009237.15	-0.967089	0.088605
ENSG00000283031	AC009242.1	-0.467494	0.818227
ENSG00000278472	AC009268.2	1.51555	0.018042
ENSG00000259744	AC009269.4	-1.30092	0.0788035
ENSG00000274297	AC009269.5	-0.797782	0.65069
ENSG00000267327	AC009271.1	0.518048	0.608218
ENSG00000235066	AC009303.2	0.208509	0.921107
ENSG00000273080	AC009309.1	0.640939	0.0855724
ENSG00000257176	AC009318.1	0.0857004	0.9102
ENSG00000273680	AC009318.2	-0.0393658	0.959476
ENSG00000274315	AC009318.3	-0.0562467	0.946654
ENSG00000275476	AC009318.4	-1.04456	0.489573
ENSG00000236255	AC009404.1	-0.29518	0.489357
ENSG00000276261	AC009509.4	-0.525335	0.393381
ENSG00000256512	AC009511.1	-0.404882	0.818775
ENSG00000256747	AC009511.2	0.291502	0.748923
ENSG00000272986	AC009570.1	-0.219468	0.815573
ENSG00000264578	AC009630.3	0.230229	0.728602
ENSG00000261460	AC009690.2	-0.00589244	0.998305
ENSG00000283667	AC009802.1	-0.766825	0.38046
ENSG00000254847	AC009806.1	-0.0191558	0.998057
ENSG00000251867	AC009812.1	0.258374	0.631522
ENSG00000263823	AC009831.1	-0.141696	0.797012
ENSG00000278840	AC009878.1	0.26321	0.819824
ENSG00000270277	AC009948.3	-0.267463	0.589051
ENSG00000270956	AC009948.4	0.0207362	0.979391
ENSG00000225963	AC009950.1	1.9683	0.157591
ENSG00000267919	AC009955.2	-1.96052	0.100475
ENSG00000268896	AC009955.3	0.796753	0.601931
ENSG00000269068	AC009955.4	0.466376	0.638265
ENSG00000226266	AC009961.1	0.0192236	0.990209
ENSG00000259659	AC009996.1	-0.0318306	0.982136
ENSG00000261019	AC010132.4	-0.192878	0.84483
ENSG00000235726	AC010148.1	-1.02998	0.34128
ENSG00000261324	AC010168.2	0.0832826	0.896973
ENSG00000258101	AC010173.1	-0.264804	0.683377
ENSG00000257027	AC010186.3	0.318873	0.359595
ENSG00000271259	AC010201.1	0.931503	0.343194
ENSG00000271327	AC010201.2	0.0274964	0.979742
ENSG00000260633	AC010207.1	0.717844	0.60104
ENSG00000247311	AC010255.1	-0.394527	0.684033
ENSG00000248664	AC010273.1	0.27151	0.742367
ENSG00000249588	AC010280.3	-0.53	0.796058
ENSG00000267927	AC010320.1	0.0615267	0.984893
ENSG00000268015	AC010320.2	0.758534	0.172628
ENSG00000269867	AC010326.3	-0.210004	0.906609
ENSG00000276570	AC010327.5	0.212044	0.702967
ENSG00000277383	AC010331.1	0.707429	0.123957
ENSG00000268199	AC010335.1	0.543489	0.700894
ENSG00000214248	AC010336.1	0.642087	0.162791
ENSG00000260500	AC010336.2	0.0363746	0.985196
ENSG00000268149	AC010336.4	0.103088	0.928892
ENSG00000269139	AC010336.5	0.929452	0.00759622
ENSG00000269813	AC010336.6	-0.558249	0.740682
ENSG00000262732	AC010401.1	0.315317	0.786958
ENSG00000268945	AC010422.2	-1.34332	0.15822
ENSG00000251257	AC010457.1	0.939738	0.115613
ENSG00000269815	AC010463.3	0.218324	0.832185
ENSG00000268746	AC010519.1	-1.18137	0.176847
ENSG00000270165	AC010530.1	1.15411	0.234912
ENSG00000226180	AC010536.1	-0.835213	0.103464
ENSG00000260671	AC010536.2	0.144741	0.945351
ENSG00000275734	AC010538.1	-0.323121	0.531398
ENSG00000260755	AC010542.2	0.23068	0.839145
ENSG00000261519	AC010542.4	0.120329	0.919061
ENSG00000247324	AC010547.1	0.22902	0.918979
ENSG00000273189	AC010619.2	0.0924271	0.954623
ENSG00000269091	AC010624.3	-0.624753	0.720498
ENSG00000267345	AC010632.1	0.747202	0.580281
ENSG00000283103	AC010642.2	0.202879	0.475895
ENSG00000268686	AC010643.1	-0.711336	0.636611
ENSG00000277369	AC010654.1	0.125868	0.879638
ENSG00000270574	AC010680.2	-0.41806	0.33589
ENSG00000271011	AC010680.3	-0.318719	0.625699
ENSG00000271141	AC010680.4	0.345049	0.718244
ENSG00000270933	AC010719.1	0.424454	0.800453
ENSG00000261379	AC010735.1	0.910668	0.0012544
ENSG00000272622	AC010735.2	1.08255	5.98416e-12
ENSG00000264577	AC010761.1	0.264097	0.556441
ENSG00000265073	AC010761.2	1.15433	0.484685
ENSG00000265474	AC010761.4	1.29709	0.391871
ENSG00000265840	AC010761.5	-0.271015	0.814755
ENSG00000267774	AC010776.2	1.6997	0.0326021
ENSG00000259287	AC010809.1	0.0209108	0.979372
ENSG00000259408	AC010809.2	-0.0308087	0.964714
ENSG00000276702	AC010809.3	0.75562	0.569834
ENSG00000253854	AC010834.3	0.606209	0.633564
ENSG00000234936	AC010883.1	0.418057	0.626655
ENSG00000237798	AC010894.4	0.22878	0.866051
ENSG00000272702	AC010913.1	-0.149532	0.877308
ENSG00000248540	AC010931.2	-1.37578	0.0283355
ENSG00000269973	AC010969.2	0.289257	0.353758
ENSG00000244151	AC010973.2	0.22856	0.653893
ENSG00000231731	AC010976.1	0.32573	0.814413
ENSG00000272789	AC010976.2	1.14487	0.0262567
ENSG00000235522	AC010978.1	0.310907	0.59698
ENSG00000272692	AC010997.4	-0.22679	0.863604
ENSG00000273248	AC010997.5	0.0437649	0.98081
ENSG00000243230	AC011005.4	-0.9244	0.559594
ENSG00000235586	AC011247.2	1.81891	0.2162
ENSG00000275601	AC011330.2	0.405626	0.813664
ENSG00000271795	AC011337.1	-0.248792	0.764946
ENSG00000248362	AC011352.1	0.353848	0.765371
ENSG00000254192	AC011365.2	-0.57841	0.633091
ENSG00000272112	AC011374.2	-0.0586929	0.943081
ENSG00000249593	AC011405.1	0.146912	0.872335
ENSG00000283897	AC011416.3	-0.482462	0.662093
ENSG00000269246	AC011445.2	0.481078	0.716512
ENSG00000267512	AC011446.1	0.692501	0.433993
ENSG00000267598	AC011446.2	-0.664473	0.0506113
ENSG00000267383	AC011447.3	0.322364	0.652266
ENSG00000197813	AC011450.1	-0.449011	0.282529
ENSG00000283108	AC011451.3	-0.0735332	0.94719
ENSG00000267197	AC011461.1	-0.3763	0.623591
ENSG00000277744	AC011462.4	-0.361725	0.713302
ENSG00000268583	AC011466.1	-0.236068	0.770528
ENSG00000260160	AC011468.1	0.315188	0.511144
ENSG00000275055	AC011468.5	-0.00412081	0.998701
ENSG00000267082	AC011472.1	1.0244	0.130151
ENSG00000267174	AC011472.2	0.943598	0.383671
ENSG00000273733	AC011472.4	0.26786	0.748161
ENSG00000267481	AC011477.2	-0.0280179	0.970254
ENSG00000268499	AC011479.2	0.333882	0.851548
ENSG00000269653	AC011479.3	0.582754	0.718072
ENSG00000267114	AC011481.1	-0.840134	0.411923
ENSG00000267282	AC011481.2	0.676755	0.212598
ENSG00000204850	AC011484.1	-1.07563	0.150674
ENSG00000268636	AC011495.2	-0.173529	0.929724
ENSG00000267011	AC011498.1	-0.371668	0.74861
ENSG00000267030	AC011498.2	-0.444381	0.764074
ENSG00000267255	AC011498.3	-0.0497877	0.989086
ENSG00000267769	AC011498.6	-0.0517937	0.926157
ENSG00000269792	AC011500.3	0.935366	0.558006
ENSG00000269289	AC011503.1	4.59209	6.25055e-78
ENSG00000269397	AC011503.2	-0.251468	0.776558
ENSG00000269652	AC011510.1	-0.533892	0.356024
ENSG00000267105	AC011511.3	1.05719	0.184884
ENSG00000257890	AC011595.2	0.0565642	0.967279
ENSG00000253307	AC011676.1	-0.413285	0.81393
ENSG00000253430	AC011726.2	0.500901	0.789644
ENSG00000254362	AC011726.3	0.647284	0.533901
ENSG00000266495	AC011731.1	0.126196	0.93917
ENSG00000231083	AC011747.1	0.0917447	0.956311
ENSG00000268573	AC011815.1	-0.224898	0.670635
ENSG00000274184	AC011815.2	0.332762	0.86469
ENSG00000272334	AC011816.2	2.25615	0.0708001
ENSG00000265008	AC011825.4	-0.442662	0.803482
ENSG00000231421	AC011840.1	1.20521	0.487357
ENSG00000279145	AC011912.1	0.630072	0.147647
ENSG00000264853	AC011933.2	-0.0396624	0.991295
ENSG00000275638	AC011939.3	0.210292	0.906609
ENSG00000261542	AC011978.2	0.311025	0.622545
ENSG00000279277	AC012020.1	0.896417	0.426195
ENSG00000269976	AC012065.3	1.01938	0.166083
ENSG00000270100	AC012065.4	0.501297	0.773273
ENSG00000271936	AC012073.1	-0.401602	0.360889
ENSG00000260350	AC012173.1	0.29748	0.660089
ENSG00000261114	AC012181.1	-0.577699	0.290083
ENSG00000261270	AC012181.2	0.0889639	0.906054
ENSG00000260111	AC012184.1	-0.360085	0.520031
ENSG00000261131	AC012186.2	0.94235	0.469157
ENSG00000272667	AC012306.2	0.0302072	0.962813
ENSG00000268049	AC012313.2	0.318079	0.352588
ENSG00000268230	AC012313.3	0.265285	0.714724
ENSG00000268912	AC012313.5	-0.0925289	0.861949
ENSG00000269106	AC012313.7	-1.21258	0.332845
ENSG00000273901	AC012313.9	-0.31488	0.748161
ENSG00000203327	AC012358.1	-0.684352	0.318439
ENSG00000240401	AC012358.3	0.149623	0.861949
ENSG00000235319	AC012360.1	-0.153902	0.930533
ENSG00000272861	AC012360.2	-0.38558	0.6472
ENSG00000224789	AC012363.1	0.277316	0.900263
ENSG00000277135	AC012409.3	-0.63803	0.18653
ENSG00000260409	AC012414.5	0.4095	0.74923
ENSG00000228251	AC012442.1	-0.563252	0.473935
ENSG00000243389	AC012442.2	0.207418	0.85548
ENSG00000225166	AC012462.1	-1.28336	0.412589
ENSG00000258303	AC012464.2	1.33567	0.248341
ENSG00000271976	AC012467.2	0.0570405	0.89845
ENSG00000260163	AC012508.1	-0.304909	0.866721
ENSG00000260634	AC012508.2	-0.020872	0.997022
ENSG00000231092	AC012513.1	-1.46973	0.173222
ENSG00000260597	AC012531.1	0.230367	0.622545
ENSG00000257327	AC012555.1	-0.636861	0.706329
ENSG00000271843	AC012557.1	-0.262495	0.821911
ENSG00000254002	AC012574.2	-1.66071	0.142452
ENSG00000253406	AC012613.2	0.163609	0.897548
ENSG00000261526	AC012615.1	-0.291571	0.494956
ENSG00000267007	AC012615.2	0.456135	0.724674
ENSG00000267125	AC012615.3	-0.361432	0.802097
ENSG00000267244	AC012615.6	0.428178	0.704858
ENSG00000267053	AC012617.1	0.550644	0.52103
ENSG00000248968	AC012640.1	-1.72554	0.0783013
ENSG00000271980	AC012640.4	0.294152	0.695888
ENSG00000274719	AC012653.2	-0.964607	0.192826
ENSG00000259211	AC013356.2	1.24286	0.354351
ENSG00000272148	AC013403.2	0.188198	0.796597
ENSG00000258425	AC013451.1	0.17954	0.720831
ENSG00000258976	AC013451.2	-0.498241	0.383477
ENSG00000273240	AC013468.1	-0.244916	0.87171
ENSG00000272056	AC013472.3	-0.0488199	0.973382
ENSG00000253875	AC013643.2	-0.145187	0.941526
ENSG00000253139	AC013644.1	1.62741	0.149325
ENSG00000259345	AC013652.1	0.79851	0.000121055
ENSG00000270557	AC013731.1	-0.466134	0.725573
ENSG00000274294	AC015660.4	-0.274273	0.900614
ENSG00000264558	AC015674.1	0.443881	0.43213
ENSG00000266872	AC015688.7	1.07547	0.412905
ENSG00000232386	AC015712.1	-0.0467922	0.976855
ENSG00000278456	AC015712.7	0.681908	0.508706
ENSG00000270091	AC015726.1	0.411142	0.443217
ENSG00000276406	AC015726.2	2.71848	0.0629708
ENSG00000267543	AC015802.3	-1.51205	0.154241
ENSG00000267546	AC015802.4	0.240974	0.816309
ENSG00000272386	AC015802.5	-1.14468	0.492505
ENSG00000264112	AC015813.1	0.194101	0.622754
ENSG00000260907	AC015818.2	0.148854	0.93978
ENSG00000265542	AC015845.2	-1.95975	0.164571
ENSG00000263015	AC015853.2	-0.425137	0.816834
ENSG00000278600	AC015871.3	-0.0575751	0.924299
ENSG00000249406	AC015909.1	-0.230615	0.666568
ENSG00000263176	AC015909.4	-0.29325	0.739772
ENSG00000262112	AC015912.1	0.890705	0.392188
ENSG00000274213	AC015912.3	-0.616328	0.466418
ENSG00000265254	AC015917.2	0.59014	0.460656
ENSG00000276855	AC015922.4	0.306845	0.478326
ENSG00000224746	AC015987.1	0.477936	0.814413
ENSG00000093100	AC016026.1	-0.209108	0.856879
ENSG00000225335	AC016027.1	-0.342208	0.552712
ENSG00000262833	AC016245.1	0.54177	0.786012
ENSG00000227540	AC016394.1	-0.296473	0.653165
ENSG00000272599	AC016394.2	-0.168985	0.827816
ENSG00000261076	AC016396.2	0.153411	0.931146
ENSG00000272384	AC016405.3	0.553027	0.5461
ENSG00000258454	AC016526.2	-0.352161	0.846013
ENSG00000268670	AC016586.1	-0.247529	0.677752
ENSG00000267124	AC016588.1	0.155809	0.837282
ENSG00000282393	AC016588.2	-0.194509	0.844552
ENSG00000267605	AC016590.1	-1.97934	0.157291
ENSG00000267682	AC016590.2	0.198099	0.855156
ENSG00000276846	AC016590.3	-0.192677	0.854203
ENSG00000261329	AC016597.1	-0.00404052	0.999231
ENSG00000251205	AC016598.2	-1.8642	0.213725
ENSG00000226548	AC016722.1	-0.000750493	0.999283
ENSG00000228925	AC016722.2	1.12467	0.0110579
ENSG00000271151	AC016737.1	0.259033	0.849906
ENSG00000223947	AC016738.1	-0.0119184	0.998329
ENSG00000272563	AC016745.2	0.398275	0.820683
ENSG00000274769	AC016747.4	-0.523408	0.794618
ENSG00000271204	AC016831.5	-0.0358695	0.988383
ENSG00000233223	AC016876.1	0.401047	0.191067
ENSG00000264772	AC016876.2	-0.453921	0.607989
ENSG00000276384	AC016876.3	-0.22857	0.778793
ENSG00000271930	AC016877.3	0.364232	0.548957
ENSG00000250934	AC016924.1	1.79996	0.0114469
ENSG00000230732	AC016949.1	0.171217	0.837603
ENSG00000276136	AC016957.2	0.791637	0.258224
ENSG00000229915	AC016999.1	-0.707562	0.265901
ENSG00000271709	AC017033.1	-0.307721	0.707644
ENSG00000259915	AC017071.1	1.43016	0.265797
ENSG00000273064	AC017083.1	-0.337602	0.724943
ENSG00000273275	AC017083.2	0.722017	0.210727
ENSG00000259985	AC017100.1	0.109819	0.908506
ENSG00000227227	AC017101.1	0.712421	0.3694
ENSG00000224376	AC017104.1	0.224132	0.741791
ENSG00000261684	AC018362.1	-0.324733	0.757638
ENSG00000241679	AC018450.1	2.13747	0.00922213
ENSG00000234520	AC018464.1	-1.01119	0.239704
ENSG00000234149	AC018511.2	0.585293	0.714724
ENSG00000275178	AC018529.1	0.55943	0.7868
ENSG00000260465	AC018557.1	0.530757	0.349047
ENSG00000271344	AC018638.6	-0.205272	0.779455
ENSG00000271553	AC018638.7	-0.0649489	0.946955
ENSG00000273014	AC018645.2	0.14096	0.787478
ENSG00000272905	AC018648.1	0.58336	0.718048
ENSG00000256967	AC018653.3	-0.219258	0.918979
ENSG00000273306	AC018690.1	0.328805	0.647737
ENSG00000275393	AC018695.6	-0.430021	0.66455
ENSG00000233005	AC018742.1	-0.252226	0.901101
ENSG00000285190	AC018754.1	0.281158	0.807565
ENSG00000267062	AC018761.2	0.298465	0.496608
ENSG00000268047	AC018766.1	-0.0987533	0.925472
ENSG00000269982	AC018809.2	0.00276043	0.999178
ENSG00000235978	AC018816.1	-0.168024	0.875869
ENSG00000274765	AC018926.1	-0.041383	0.982565
ENSG00000276533	AC018926.2	-1.26564	0.154852
ENSG00000277548	AC018926.3	0.159005	0.894961
ENSG00000214559	AC019077.1	0.507709	0.641175
ENSG00000213963	AC019080.1	0.575026	0.0243108
ENSG00000272777	AC019131.2	0.696501	0.0828178
ENSG00000269210	AC019171.1	0.529201	0.26047
ENSG00000234584	AC019186.1	0.00164016	0.999283
ENSG00000272784	AC019193.2	0.547523	0.580611
ENSG00000256686	AC019209.3	0.331777	0.853537
ENSG00000264666	AC020558.1	1.24383	0.00262907
ENSG00000255886	AC020611.2	1.90793	0.106315
ENSG00000273123	AC020634.1	0.920069	0.110237
ENSG00000174171	AC020659.1	-0.287823	0.87171
ENSG00000250379	AC020659.2	-0.908698	0.451293
ENSG00000251161	AC020661.1	-0.618963	0.186882
ENSG00000267077	AC020663.2	0.552181	0.734793
ENSG00000275056	AC020663.3	-1.29267	0.394846
ENSG00000275441	AC020765.2	-0.636622	0.399171
ENSG00000249180	AC020900.1	0.815394	0.0684754
ENSG00000268518	AC020909.2	-0.26732	0.869106
ENSG00000268854	AC020909.3	0.508437	0.26929
ENSG00000274104	AC020910.4	0.543831	0.250136
ENSG00000284430	AC020912.1	-0.60978	0.677752
ENSG00000268056	AC020913.1	0.048881	0.967279
ENSG00000269480	AC020913.2	0.0109727	0.998329
ENSG00000267216	AC020915.1	-0.49706	0.308502
ENSG00000268201	AC020915.2	-0.00012642	0.999814
ENSG00000277825	AC020917.3	0.489028	0.799952
ENSG00000267260	AC020928.2	0.24447	0.819377
ENSG00000267387	AC020931.1	0.566091	0.419366
ENSG00000267735	AC020934.2	0.519172	0.417559
ENSG00000259797	AC020978.1	-0.568969	0.72423
ENSG00000262160	AC020978.5	0.291643	0.782941
ENSG00000262514	AC020978.6	-0.796618	0.547781
ENSG00000263276	AC020978.7	-0.651575	0.47582
ENSG00000261338	AC021016.2	0.152007	0.687489
ENSG00000273361	AC021016.3	0.0726541	0.944081
ENSG00000230551	AC021078.1	0.177222	0.476457
ENSG00000260774	AC021087.3	0.12098	0.922583
ENSG00000272661	AC021097.1	0.237244	0.614594
ENSG00000230747	AC021188.1	-0.425367	0.820456
ENSG00000273007	AC021205.3	-0.874387	0.51325
ENSG00000250286	AC021491.2	-0.0120746	0.998633
ENSG00000275897	AC021491.4	-0.0107873	0.998633
ENSG00000267313	AC021504.1	-0.060515	0.970964
ENSG00000254041	AC021546.1	1.9862	0.0833304
ENSG00000259407	AC021739.2	0.696491	0.196401
ENSG00000259544	AC021739.4	0.464688	0.602658
ENSG00000273674	AC021752.1	-0.690582	0.591761
ENSG00000272800	AC021851.1	0.86568	0.233433
ENSG00000206567	AC022007.1	0.391407	0.336274
ENSG00000278733	AC022079.2	1.65191	0.0932788
ENSG00000267783	AC022098.3	0.53017	0.790445
ENSG00000250328	AC022101.1	1.12034	0.506544
ENSG00000267892	AC022144.1	0.219254	0.917898
ENSG00000180458	AC022148.1	0.526914	0.167297
ENSG00000268093	AC022154.1	0.141979	0.922457
ENSG00000261243	AC022165.1	-0.755208	0.630179
ENSG00000233849	AC022201.2	-0.173918	0.9018
ENSG00000263786	AC022211.1	-0.223169	0.809536
ENSG00000265800	AC022211.3	-0.748297	0.562851
ENSG00000253736	AC022217.3	0.0474057	0.97302
ENSG00000269954	AC022239.1	2.78786	0.00174362
ENSG00000275580	AC022306.2	-0.218098	0.812902
ENSG00000247934	AC022364.1	-0.166704	0.712473
ENSG00000269886	AC022382.1	-0.152111	0.890884
ENSG00000272140	AC022400.5	0.508846	0.478319
ENSG00000274654	AC022467.1	0.254062	0.757528
ENSG00000255750	AC022509.1	-0.50392	0.628779
ENSG00000256894	AC022509.3	-1.05407	0.000771606
ENSG00000259767	AC022558.1	-0.61238	0.61743
ENSG00000273747	AC022558.3	-0.80247	0.312982
ENSG00000268873	AC022601.1	0.934014	0.17692
ENSG00000267940	AC022762.2	-0.718742	0.358733
ENSG00000254340	AC022784.7	1.28917	0.0973192
ENSG00000259921	AC022819.1	1.47997	0.288807
ENSG00000253636	AC022893.1	0.0751097	0.92401
ENSG00000273792	AC022898.2	-0.954243	0.462802
ENSG00000253608	AC022915.2	-0.697951	0.412418
ENSG00000266947	AC022916.1	-0.234405	0.730491
ENSG00000274281	AC022929.2	1.16631	0.347014
ENSG00000276282	AC022960.2	0.133517	0.943845
ENSG00000267601	AC022966.1	0.439558	0.0225367
ENSG00000274849	AC023043.4	0.232245	0.806471
ENSG00000248115	AC023154.1	5.48927	3.11778e-32
ENSG00000276900	AC023157.3	-0.241621	0.682187
ENSG00000253891	AC023202.1	0.204273	0.929398
ENSG00000271983	AC023302.1	0.168974	0.931095
ENSG00000263720	AC023394.2	1.16705	0.478767
ENSG00000257379	AC023509.1	-0.297179	0.530557
ENSG00000257550	AC023509.2	-0.115511	0.916395
ENSG00000270175	AC023509.4	0.167915	0.775459
ENSG00000255621	AC023790.2	-1.18958	0.24363
ENSG00000248265	AC023794.1	0.386047	0.532682
ENSG00000260470	AC023794.7	-0.796051	0.600134
ENSG00000256482	AC023796.2	0.241731	0.844552
ENSG00000260052	AC023813.3	-0.894343	0.469804
ENSG00000278434	AC023830.3	0.635831	0.619648
ENSG00000259327	AC023906.3	0.28165	0.73797
ENSG00000259709	AC023906.4	0.24596	0.86555
ENSG00000259712	AC023906.5	0.911879	0.00977905
ENSG00000261136	AC023908.3	0.765588	0.0763141
ENSG00000267904	AC024075.1	0.0867689	0.85714
ENSG00000269044	AC024075.2	0.21549	0.474042
ENSG00000269427	AC024075.3	1.12751	0.500205
ENSG00000248515	AC024230.1	-1.41807	0.0584513
ENSG00000272969	AC024243.1	-0.592409	0.764188
ENSG00000260579	AC024270.3	-0.622482	0.214941
ENSG00000259702	AC024337.1	3.73017	0.000730663
ENSG00000273771	AC024337.2	-0.305651	0.587281
ENSG00000262410	AC024361.1	0.800776	0.612896
ENSG00000269924	AC024451.4	-0.297479	0.889208
ENSG00000273308	AC024560.3	1.70302	0.078195
ENSG00000267277	AC024575.1	0.739257	0.151777
ENSG00000276272	AC024884.2	-1.18465	0.339566
ENSG00000247903	AC024896.1	0.210014	0.920217
ENSG00000255910	AC024901.1	0.252554	0.90918
ENSG00000274021	AC024909.2	-0.405663	0.595012
ENSG00000272656	AC024933.1	0.870479	0.189547
ENSG00000257496	AC025031.1	-0.914199	0.0531207
ENSG00000275481	AC025031.4	0.305239	0.818147
ENSG00000258302	AC025034.1	-0.521086	0.724236
ENSG00000267095	AC025048.1	0.180554	0.770528
ENSG00000267248	AC025048.2	0.194051	0.632891
ENSG00000258554	AC025162.1	-0.281495	0.807485
ENSG00000273973	AC025162.2	0.0731674	0.973054
ENSG00000224713	AC025165.1	0.385273	0.536837
ENSG00000257342	AC025165.2	0.430294	0.302358
ENSG00000269903	AC025165.4	-0.247011	0.839142
ENSG00000270039	AC025165.5	0.0030174	0.999169
ENSG00000251131	AC025171.3	0.468863	0.62484
ENSG00000272144	AC025171.4	0.0494471	0.96162
ENSG00000272382	AC025171.5	-0.976373	0.440338
ENSG00000272416	AC025175.1	-0.422659	0.610468
ENSG00000250081	AC025176.1	0.645913	0.70868
ENSG00000250764	AC025178.1	0.0534046	0.979527
ENSG00000225407	AC025188.1	-0.829344	0.0247473
ENSG00000257386	AC025257.1	1.65862	0.0265368
ENSG00000257663	AC025259.1	0.0460696	0.951503
ENSG00000257681	AC025265.1	-0.31548	0.724719
ENSG00000260859	AC025280.1	2.81579	3.45104e-05
ENSG00000276408	AC025287.2	1.29018	0.270045
ENSG00000256325	AC025423.1	-1.77876	0.15386
ENSG00000257181	AC025423.4	1.31779	0.00331358
ENSG00000259563	AC025430.1	0.762677	0.664134
ENSG00000253744	AC025442.1	0.531467	0.773072
ENSG00000258168	AC025569.1	-0.406926	0.796025
ENSG00000255629	AC025576.1	-0.938673	0.553684
ENSG00000250234	AC025754.1	-0.229818	0.70317
ENSG00000270133	AC025766.1	-0.0366547	0.99186
ENSG00000225798	AC025918.1	0.121762	0.946955
ENSG00000250280	AC026124.1	0.475897	0.497984
ENSG00000260693	AC026150.1	0.976299	0.54975
ENSG00000254485	AC026191.1	0.422155	0.457964
ENSG00000233912	AC026202.2	0.417023	0.739787
ENSG00000268509	AC026202.3	0.319669	0.647737
ENSG00000266313	AC026254.2	-1.096	0.514097
ENSG00000268129	AC026304.1	-0.522643	0.411587
ENSG00000239739	AC026316.2	-1.37081	0.357354
ENSG00000228561	AC026355.1	-0.157661	0.896193
ENSG00000274964	AC026356.1	-0.357531	0.36714
ENSG00000276115	AC026356.2	-0.203148	0.745386
ENSG00000256028	AC026362.1	0.0489676	0.935248
ENSG00000270482	AC026367.1	0.118336	0.935297
ENSG00000275409	AC026367.2	-0.254862	0.857763
ENSG00000275759	AC026367.3	0.450411	0.519077
ENSG00000277840	AC026368.1	0.414653	0.752045
ENSG00000275088	AC026469.1	0.754032	0.472451
ENSG00000260267	AC026471.1	-0.146342	0.664789
ENSG00000260740	AC026471.3	-0.538322	0.652431
ENSG00000261474	AC026471.4	0.275636	0.581644
ENSG00000270021	AC026691.1	-0.206675	0.754976
ENSG00000249713	AC026725.1	0.474172	0.756309
ENSG00000271781	AC026740.1	-1.0513	0.299891
ENSG00000272103	AC026741.1	0.108894	0.926967
ENSG00000260545	AC026771.1	1.27416	0.233433
ENSG00000271892	AC026790.1	1.139	0.453382
ENSG00000260366	AC026803.1	0.359267	0.767639
ENSG00000253688	AC026904.3	0.409324	0.665515
ENSG00000263171	AC026954.3	0.304623	0.81951
ENSG00000272375	AC026979.3	-0.138023	0.865039
ENSG00000270127	AC027020.2	0.314322	0.596829
ENSG00000267787	AC027097.2	0.689717	0.0229548
ENSG00000253671	AC027117.1	2.55182	3.26366e-05
ENSG00000272576	AC027271.1	1.11128	0.275064
ENSG00000256013	AC027277.1	0.338569	0.866741
ENSG00000257894	AC027288.3	4.16524	2.32009e-106
ENSG00000256152	AC027290.1	0.756524	0.287023
ENSG00000267092	AC027307.1	-0.524557	0.751572
ENSG00000267317	AC027307.2	0.189076	0.486993
ENSG00000268798	AC027307.3	0.0412954	0.951026
ENSG00000267484	AC027319.1	-0.404719	0.415386
ENSG00000260368	AC027373.1	-0.808727	0.319722
ENSG00000266900	AC027514.1	0.491647	0.811851
ENSG00000256588	AC027544.2	0.376921	0.831878
ENSG00000278107	AC027575.2	0.491062	0.28489
ENSG00000260005	AC027601.1	0.192962	0.842462
ENSG00000276101	AC027601.4	0.176645	0.723111
ENSG00000248936	AC027607.1	1.22706	0.156955
ENSG00000272831	AC027644.3	-0.101422	0.814712
ENSG00000259945	AC027682.2	-1.09786	0.109157
ENSG00000260894	AC027682.3	-0.449903	0.571042
ENSG00000261386	AC027682.4	-0.458554	0.762203
ENSG00000261396	AC027682.5	0.0582201	0.946955
ENSG00000276075	AC027682.6	-0.109483	0.872411
ENSG00000260588	AC027702.1	-0.0201772	0.995528
ENSG00000261916	AC027796.1	-0.139158	0.946955
ENSG00000204584	AC027801.1	0.58544	0.633408
ENSG00000274340	AC032011.1	-0.0376785	0.977287
ENSG00000257553	AC034102.4	-0.141048	0.827919
ENSG00000258317	AC034102.6	0.53669	0.38627
ENSG00000258345	AC034102.7	-0.21749	0.900945
ENSG00000272263	AC034198.2	0.0527743	0.965559
ENSG00000271918	AC034236.2	-0.107332	0.858888
ENSG00000249328	AC036214.1	-1.77881	0.00498429
ENSG00000272518	AC036214.2	-0.125311	0.901261
ENSG00000251034	AC037459.2	-0.54666	0.783175
ENSG00000253200	AC037459.3	-0.252688	0.428839
ENSG00000254230	AC037459.4	0.240714	0.647154
ENSG00000278493	AC039056.2	0.146585	0.930096
ENSG00000262691	AC040160.1	-0.188837	0.780248
ENSG00000263126	AC040162.3	-0.646501	0.515639
ENSG00000274677	AC040169.3	0.105795	0.949227
ENSG00000253347	AC040934.1	0.326698	0.733428
ENSG00000262089	AC040977.1	0.00598542	0.998305
ENSG00000258122	AC044802.2	0.204602	0.844552
ENSG00000272256	AC044849.1	1.11262	0.00839959
ENSG00000242880	AC046136.1	-0.507849	0.762653
ENSG00000272707	AC046143.2	0.568498	0.572059
ENSG00000275180	AC048341.2	0.205632	0.682653
ENSG00000277342	AC048344.4	-0.844811	0.577426
ENSG00000259244	AC048382.2	1.0823	0.394846
ENSG00000276278	AC048382.6	0.303414	0.652819
ENSG00000259539	AC051619.6	0.177525	0.826816
ENSG00000260035	AC051619.8	-0.735614	0.564212
ENSG00000234638	AC053503.4	-2.93833	1.23843e-12
ENSG00000268603	AC053503.5	-0.524673	0.283753
ENSG00000256973	AC053513.1	0.382784	0.620536
ENSG00000234136	AC055764.1	-1.01542	0.464478
ENSG00000273375	AC055764.2	0.421593	0.746837
ENSG00000266498	AC055811.3	0.195315	0.925626
ENSG00000260773	AC055855.1	0.551907	0.781115
ENSG00000233665	AC060234.2	0.275007	0.892466
ENSG00000267547	AC060766.4	0.00174613	0.999178
ENSG00000267711	AC060766.6	0.274938	0.747411
ENSG00000267745	AC060766.7	0.00130571	0.999231
ENSG00000267002	AC060780.1	0.0719877	0.886334
ENSG00000260777	AC061975.1	-0.0614738	0.98506
ENSG00000278344	AC063943.1	0.414528	0.751572
ENSG00000272597	AC063944.3	1.1234	0.504357
ENSG00000260586	AC064799.2	-1.80799	0.225554
ENSG00000278017	AC064801.1	-0.0280894	0.995785
ENSG00000272024	AC064807.4	0.508483	0.652702
ENSG00000273456	AC064836.3	-0.57572	0.212492
ENSG00000241409	AC064852.1	0.905194	0.52897
ENSG00000225649	AC064875.1	-0.405968	0.76514
ENSG00000272631	AC067750.1	0.0905044	0.840382
ENSG00000272338	AC067838.1	0.286119	0.56272
ENSG00000267632	AC067852.3	0.0401954	0.96483
ENSG00000254812	AC067930.3	0.954016	0.556058
ENSG00000255050	AC067930.5	1.31253	0.388524
ENSG00000264808	AC068025.1	0.4579	0.807161
ENSG00000266111	AC068025.2	-0.204241	0.870344
ENSG00000262879	AC068152.1	0.189523	0.271432
ENSG00000283341	AC068205.2	0.196017	0.727783
ENSG00000260274	AC068338.2	-0.296846	0.516232
ENSG00000275645	AC068338.3	0.542772	0.493928
ENSG00000255498	AC068385.1	0.331536	0.76829
ENSG00000229512	AC068580.1	-0.660168	0.340586
ENSG00000269921	AC068620.1	0.392264	0.730292
ENSG00000270147	AC068620.2	-1.90948	0.105534
ENSG00000260398	AC068700.1	-1.35452	0.370751
ENSG00000282556	AC068733.3	0.322916	0.348224
ENSG00000269938	AC068790.2	-0.199757	0.867764
ENSG00000269997	AC068790.3	-0.469506	0.520225
ENSG00000270048	AC068790.4	-0.407511	0.65302
ENSG00000270061	AC068790.5	-0.31415	0.757626
ENSG00000270095	AC068790.6	0.353357	0.788971
ENSG00000270130	AC068790.7	-0.464036	0.52897
ENSG00000275389	AC068790.9	-0.465895	0.576638
ENSG00000275769	AC068792.1	-0.0787811	0.951779
ENSG00000259661	AC068831.4	0.146622	0.923666
ENSG00000278514	AC068831.6	-1.33294	0.208597
ENSG00000260619	AC068870.1	-1.09899	0.318439
ENSG00000277782	AC068870.2	-0.0114354	0.991924
ENSG00000260122	AC068987.2	0.320343	0.853537
ENSG00000260473	AC068987.3	-0.223116	0.920814
ENSG00000253496	AC068992.1	0.174793	0.927583
ENSG00000273209	AC069148.1	-0.311977	0.853537
ENSG00000233581	AC069155.1	-0.424651	0.300189
ENSG00000255046	AC069185.1	0.125632	0.848378
ENSG00000274029	AC069209.1	-1.7677	0.238363
ENSG00000223711	AC069213.1	-0.908617	0.322784
ENSG00000273374	AC069222.1	-0.724334	0.507673
ENSG00000255946	AC069234.1	-0.285009	0.851899
ENSG00000256364	AC069234.2	0.10899	0.892466
ENSG00000256569	AC069234.3	-0.767655	0.477928
ENSG00000276188	AC069234.4	0.223217	0.884632
ENSG00000277423	AC069234.5	0.318386	0.64056
ENSG00000254559	AC069287.2	-0.153863	0.893073
ENSG00000269949	AC069307.1	-0.414007	0.577211
ENSG00000250041	AC069360.1	-0.611485	0.672122
ENSG00000255856	AC069503.1	0.0908864	0.93236
ENSG00000273455	AC072039.2	0.638313	0.70317
ENSG00000237870	AC073130.1	-1.11665	0.107535
ENSG00000243243	AC073130.2	-1.12858	0.373446
ENSG00000259589	AC073167.1	0.162283	0.925142
ENSG00000271855	AC073195.1	0.00998839	0.997022
ENSG00000237126	AC073254.1	0.88283	0.403807
ENSG00000217702	AC073263.1	0.889478	0.193138
ENSG00000279070	AC073263.2	-0.744717	0.610963
ENSG00000225187	AC073283.1	-0.278133	0.870192
ENSG00000226087	AC073283.2	-0.992856	0.280842
ENSG00000242578	AC073288.2	-1.62933	0.0675221
ENSG00000217455	AC073316.1	-0.137085	0.877204
ENSG00000225794	AC073321.1	1.01032	0.425425
ENSG00000237773	AC073332.1	-0.424088	0.421109
ENSG00000228010	AC073343.2	0.293681	0.750606
ENSG00000225213	AC073367.1	-0.254762	0.852211
ENSG00000268584	AC073389.1	-0.83423	0.264066
ENSG00000272791	AC073389.3	-0.952739	0.273194
ENSG00000261096	AC073476.3	0.22541	0.814413
ENSG00000257509	AC073487.1	0.0384164	0.972888
ENSG00000278834	AC073508.3	-0.28379	0.396331
ENSG00000277130	AC073569.3	-0.809975	0.528002
ENSG00000258225	AC073571.1	4.99567	0.00165991
ENSG00000257808	AC073573.1	1.30611	0.392373
ENSG00000274227	AC073575.2	-1.91573	0.0561709
ENSG00000258365	AC073655.2	0.32529	0.852167
ENSG00000242798	AC073842.2	-1.0471	0.0970262
ENSG00000251679	AC073848.1	-1.59251	0.0406603
ENSG00000257359	AC073863.1	-1.1407	0.0857016
ENSG00000273073	AC073869.3	-0.621329	0.655804
ENSG00000256299	AC073912.2	0.552083	0.487357
ENSG00000257607	AC073957.2	-0.0675715	0.973086
ENSG00000273151	AC073957.3	0.251627	0.776839
ENSG00000272368	AC074032.1	0.116973	0.890718
ENSG00000272844	AC074044.1	-0.031981	0.993917
ENSG00000267886	AC074135.1	-0.248385	0.748341
ENSG00000276071	AC074138.1	-0.41267	0.58467
ENSG00000248206	AC074194.1	0.0636407	0.960652
ENSG00000259605	AC074212.1	0.267809	0.611394
ENSG00000284644	AC074386.1	0.194324	0.925626
ENSG00000235872	AC078777.1	-0.959465	0.339566
ENSG00000269984	AC078795.1	1.25183	0.0794138
ENSG00000270096	AC078795.2	-0.149009	0.896867
ENSG00000270135	AC078795.3	-0.536786	0.724835
ENSG00000269889	AC078802.1	0.788562	0.232946
ENSG00000273329	AC078846.1	-0.00152278	0.99919
ENSG00000248187	AC078850.1	1.58828	1.51299e-06
ENSG00000271579	AC078880.3	-1.61892	0.00883529
ENSG00000226963	AC078883.2	0.537257	0.494181
ENSG00000253317	AC078906.1	-0.263244	0.898021
ENSG00000259460	AC078909.1	-0.269139	0.759597
ENSG00000274444	AC078909.2	-0.107226	0.956231
ENSG00000258355	AC079174.1	-0.80878	0.463908
ENSG00000277715	AC079174.2	0.0150595	0.991922
ENSG00000249258	AC079193.2	-0.824134	0.265826
ENSG00000278981	AC079298.1	4.14631	4.41596e-08
ENSG00000280241	AC079298.3	3.89254	11111111111111
ENSG00000222043	AC079305.1	0.622874	0.0587852
ENSG00000229337	AC079305.3	0.908974	0.0339652
ENSG00000261187	AC079322.1	0.841087	0.335083
ENSG00000259627	AC079328.2	0.0567345	0.935885
ENSG00000254680	AC079329.1	-0.69076	0.348061
ENSG00000265222	AC079336.2	-1.07958	0.323132
ENSG00000226757	AC079341.1	1.35379	0.308186
ENSG00000231903	AC079354.3	0.659038	0.626655
ENSG00000251388	AC079380.1	0.171785	0.935051
ENSG00000257545	AC079385.1	-0.36086	0.793827
ENSG00000257711	AC079385.2	-0.839599	0.355936
ENSG00000257918	AC079385.3	-0.755897	0.48303
ENSG00000276007	AC079414.3	0.457786	0.408656
ENSG00000232633	AC079465.1	1.60524	0.0175839
ENSG00000257225	AC079601.1	-0.226689	0.727806
ENSG00000270659	AC079610.2	1.03274	0.0096271
ENSG00000274943	AC079684.1	0.00911321	0.998329
ENSG00000232581	AC079742.1	-0.234794	0.809121
ENSG00000272646	AC079766.1	-0.0943806	0.938627
ENSG00000228643	AC079779.2	-0.288389	0.89684
ENSG00000284707	AC079781.5	-0.0378224	0.977008
ENSG00000233230	AC079807.1	0.0161279	0.992094
ENSG00000272944	AC079834.2	0.153513	0.855285
ENSG00000257222	AC079907.1	-1.59937	0.226897
ENSG00000266371	AC079915.1	0.0406725	0.991282
ENSG00000249207	AC079921.1	0.219022	0.786854
ENSG00000249685	AC079921.2	-0.89649	0.0108212
ENSG00000256001	AC079949.1	-0.0844414	0.937944
ENSG00000278266	AC079949.2	-0.291584	0.701319
ENSG00000240207	AC080013.1	0.612714	0.0776555
ENSG00000271778	AC080013.3	-1.57806	0.237035
ENSG00000274565	AC080038.1	0.0457306	0.934102
ENSG00000256458	AC080075.1	0.148803	0.934001
ENSG00000239300	AC080162.1	0.192932	0.925894
ENSG00000249609	AC080188.1	-0.834848	0.506026
ENSG00000240687	AC082651.1	0.219274	0.92268
ENSG00000203644	AC083799.1	-0.0478702	0.935248
ENSG00000245651	AC083805.1	-0.214498	0.88075
ENSG00000273805	AC083805.3	0.543564	0.550035
ENSG00000272941	AC083862.2	0.150969	0.717049
ENSG00000273391	AC083880.1	-0.244756	0.744714
ENSG00000272293	AC083964.1	-0.674906	0.0961968
ENSG00000254337	AC083967.1	-0.871182	0.0188771
ENSG00000274292	AC084018.2	0.0742209	0.939351
ENSG00000253356	AC084024.3	0.456462	0.597428
ENSG00000272990	AC084036.1	0.604474	0.0950052
ENSG00000256006	AC084117.1	0.929171	0.143624
ENSG00000254578	AC084125.1	0.227328	0.876952
ENSG00000255182	AC084125.2	-0.0394252	0.971361
ENSG00000265393	AC084125.4	0.278669	0.597868
ENSG00000257202	AC084398.2	0.601683	0.639384
ENSG00000236377	AC084809.2	-0.286749	0.745292
ENSG00000274105	AC084824.3	-0.324732	0.74794
ENSG00000275854	AC084824.4	0.402025	0.521141
ENSG00000276148	AC084824.5	-0.521587	0.65302
ENSG00000277299	AC084876.1	0.735278	0.679513
ENSG00000266677	AC087164.1	0.616401	0.0961968
ENSG00000260349	AC087190.1	-0.755869	0.666197
ENSG00000263244	AC087190.3	-0.149276	0.375124
ENSG00000270074	AC087203.3	-2.02593	0.141026
ENSG00000278743	AC087239.1	0.861682	0.565949
ENSG00000254577	AC087276.1	-0.106269	0.945351
ENSG00000254907	AC087276.2	0.345134	0.843755
ENSG00000255340	AC087276.3	0.633001	0.668437
ENSG00000283415	AC087280.2	-0.190971	0.851759
ENSG00000259375	AC087286.3	0.0540588	0.949447
ENSG00000259453	AC087286.4	1.18857	0.25508
ENSG00000267342	AC087289.2	0.167807	0.909902
ENSG00000267801	AC087289.5	-0.330727	0.658677
ENSG00000263165	AC087292.1	0.107617	0.950731
ENSG00000265010	AC087301.1	0.95652	0.452838
ENSG00000255487	AC087362.2	0.183197	0.925626
ENSG00000262003	AC087392.1	-0.409066	0.339127
ENSG00000262228	AC087392.3	-0.348459	0.837603
ENSG00000262434	AC087392.4	-0.0537927	0.946777
ENSG00000277491	AC087392.5	-0.257538	0.881092
ENSG00000263986	AC087393.2	0.215444	0.774974
ENSG00000253358	AC087439.1	0.355512	0.834009
ENSG00000259275	AC087477.2	0.104548	0.813981
ENSG00000259347	AC087482.1	-0.316845	0.812575
ENSG00000271851	AC087501.4	-0.0215675	0.973108
ENSG00000244953	AC087521.1	1.11315	0.219757
ENSG00000246250	AC087521.2	0.0323592	0.993881
ENSG00000254409	AC087521.3	0.0804527	0.94446
ENSG00000283375	AC087521.4	0.810829	0.302143
ENSG00000285367	AC087564.1	0.295817	0.571745
ENSG00000255201	AC087623.2	-0.416293	0.806961
ENSG00000272092	AC087623.3	0.609559	0.349983
ENSG00000272159	AC087623.4	-0.151432	0.892456
ENSG00000258773	AC087636.1	0.20036	0.809067
ENSG00000267737	AC087645.2	0.250751	0.7966
ENSG00000254288	AC087672.2	-0.114362	0.926544
ENSG00000276174	AC087683.2	-0.00477723	0.999178
ENSG00000262580	AC087741.1	0.288163	0.530519
ENSG00000275479	AC087741.2	0.791631	0.544417
ENSG00000272509	AC087752.4	0.0606038	0.979321
ENSG00000259278	AC087878.1	0.72332	0.152762
ENSG00000274598	AC087893.1	-0.571075	0.764057
ENSG00000257732	AC089983.1	-0.669789	0.0222214
ENSG00000257286	AC089999.1	0.11521	0.947153
ENSG00000277566	AC089999.2	0.433932	0.807507
ENSG00000256915	AC090023.2	-0.938389	0.510086
ENSG00000224239	AC090044.1	0.29996	0.79107
ENSG00000269951	AC090181.2	-0.134837	0.910866
ENSG00000272076	AC090186.1	1.79331	0.145552
ENSG00000253227	AC090192.2	-0.027664	0.970719
ENSG00000253106	AC090198.1	0.205332	0.6402
ENSG00000247134	AC090204.1	0.320965	0.756543
ENSG00000267397	AC090229.1	0.897665	0.121322
ENSG00000274776	AC090241.3	1.19763	0.216918
ENSG00000277310	AC090246.1	-0.689341	0.680303
ENSG00000260988	AC090260.1	0.93568	0.402256
ENSG00000267279	AC090409.1	-0.628418	0.0299882
ENSG00000267316	AC090409.2	-0.507987	0.646731
ENSG00000272660	AC090425.1	0.465559	0.806308
ENSG00000272910	AC090425.2	0.551708	0.53317
ENSG00000274403	AC090510.2	0.031383	0.992094
ENSG00000278769	AC090510.3	0.528964	0.682923
ENSG00000259353	AC090515.4	0.0906249	0.918979
ENSG00000259402	AC090515.5	0.331828	0.780531
ENSG00000274667	AC090517.2	-0.108705	0.944036
ENSG00000253553	AC090568.2	-0.676728	0.427055
ENSG00000270060	AC090589.3	0.0280869	0.984212
ENSG00000259322	AC090607.1	-0.536556	0.708192
ENSG00000272418	AC090607.4	0.417949	0.829894
ENSG00000236838	AC090617.2	-0.307856	0.76286
ENSG00000262533	AC090617.3	-0.104911	0.901101
ENSG00000254165	AC090739.1	-0.439782	0.49207
ENSG00000265750	AC090772.3	1.49756	0.121322
ENSG00000259363	AC090825.1	-0.0529935	0.920611
ENSG00000261821	AC090826.1	-0.0637962	0.96094
ENSG00000264968	AC090844.2	-0.255292	0.901536
ENSG00000259376	AC090907.1	-0.60645	0.705854
ENSG00000259755	AC090907.2	0.226973	0.888859
ENSG00000265943	AC090912.1	0.393444	0.802532
ENSG00000271964	AC090948.1	0.703699	0.609059
ENSG00000272498	AC090948.2	1.24809	0.115715
ENSG00000272529	AC090948.3	1.07298	0.543564
ENSG00000274528	AC090970.3	-0.282683	0.676632
ENSG00000259185	AC090971.1	-0.879458	0.511384
ENSG00000259536	AC091045.1	0.629035	0.708793
ENSG00000254665	AC091053.1	-0.239213	0.718915
ENSG00000230532	AC091133.1	-0.176072	0.770571
ENSG00000267160	AC091152.2	-0.241314	0.7025
ENSG00000261898	AC091153.4	0.197427	0.921189
ENSG00000275345	AC091167.5	-0.899208	0.262108
ENSG00000250186	AC091180.3	-0.0493189	0.947749
ENSG00000250948	AC091180.4	-0.731979	0.680132
ENSG00000262039	AC091180.5	-0.659998	0.66574
ENSG00000253123	AC091182.1	-1.68414	0.0980327
ENSG00000253746	AC091182.2	-1.67195	4.98115e-06
ENSG00000253476	AC091185.1	0.0452732	0.969001
ENSG00000273702	AC091271.1	-0.560268	0.311966
ENSG00000254343	AC091563.1	1.08389	3.87446e-09
ENSG00000254400	AC091564.2	-0.309136	0.488301
ENSG00000255410	AC091564.5	-0.755822	0.494572
ENSG00000255680	AC091564.6	-0.299061	0.581532
ENSG00000285338	AC091564.7	-0.185632	0.813204
ENSG00000266283	AC091588.3	-0.615655	0.512398
ENSG00000273219	AC091736.1	-0.0839636	0.959744
ENSG00000236393	AC091806.1	-0.097153	0.881304
ENSG00000251556	AC091887.1	-0.806633	0.600134
ENSG00000272049	AC091965.4	0.241176	0.907391
ENSG00000275765	AC091982.3	0.0710663	0.906275
ENSG00000283849	AC092053.2	0.285887	0.799913
ENSG00000284669	AC092053.3	-0.116495	0.94223
ENSG00000267458	AC092069.1	0.148628	0.743013
ENSG00000275367	AC092111.1	-0.73525	0.0258738
ENSG00000276417	AC092111.2	-0.292423	0.823405
ENSG00000261602	AC092115.2	0.519532	0.702967
ENSG00000276791	AC092117.1	-0.0662025	0.931906
ENSG00000276166	AC092118.2	-0.135402	0.901536
ENSG00000274460	AC092119.2	0.111968	0.867707
ENSG00000261118	AC092123.1	0.0616267	0.96094
ENSG00000260417	AC092127.1	0.203681	0.914039
ENSG00000270124	AC092127.2	-1.59565	0.000289333
ENSG00000260621	AC092140.1	0.863047	0.489997
ENSG00000259006	AC092143.2	-0.303392	0.756726
ENSG00000267048	AC092143.3	-0.174367	0.834009
ENSG00000226622	AC092155.1	1.01251	0.0228895
ENSG00000226965	AC092167.1	-0.105329	0.914765
ENSG00000232034	AC092168.2	1.09149	0.524925
ENSG00000230733	AC092171.2	0.132691	0.866051
ENSG00000272953	AC092171.4	-0.577633	0.363795
ENSG00000268362	AC092279.1	0.265007	0.455944
ENSG00000228629	AC092295.1	0.465559	0.806308
ENSG00000284428	AC092329.4	0.535702	0.17513
ENSG00000261512	AC092368.3	-0.610766	0.0833715
ENSG00000260306	AC092375.2	0.431323	0.706417
ENSG00000245768	AC092378.1	0.534495	0.391871
ENSG00000227189	AC092535.1	-0.645398	0.676787
ENSG00000273179	AC092535.4	-1.03173	0.257103
ENSG00000249988	AC092546.1	-2.2416	0.0763257
ENSG00000272885	AC092574.1	0.645834	0.418264
ENSG00000223523	AC092598.1	-1.4424	0.13964
ENSG00000273245	AC092653.1	0.00688097	0.998919
ENSG00000230393	AC092667.1	-1.09505	0.0490685
ENSG00000272275	AC092687.3	0.0814702	0.919104
ENSG00000275764	AC092747.4	0.245174	0.416771
ENSG00000259238	AC092755.2	0.369407	0.601931
ENSG00000259771	AC092756.1	0.42464	0.73632
ENSG00000277144	AC092757.3	-0.00193414	0.999231
ENSG00000274987	AC092794.1	-0.0545724	0.978828
ENSG00000260805	AC092803.2	-0.153365	0.81962
ENSG00000282057	AC092807.3	-0.252222	0.42372
ENSG00000237101	AC092809.4	1.07131	0.0859909
ENSG00000254038	AC092818.1	-0.188816	0.93236
ENSG00000253284	AC092828.1	0.525784	0.525411
ENSG00000241357	AC092849.2	-0.1425	0.930259
ENSG00000248787	AC092903.2	0.0913384	0.929618
ENSG00000240497	AC092919.1	-0.791627	0.609797
ENSG00000243176	AC092944.1	-0.367431	0.34586
ENSG00000235795	AC093157.2	-0.144192	0.943081
ENSG00000228541	AC093159.1	-0.042951	0.991295
ENSG00000267152	AC093227.1	0.247451	0.62153
ENSG00000260167	AC093249.2	0.218115	0.912877
ENSG00000261840	AC093249.6	-0.0500884	0.947749
ENSG00000272335	AC093297.2	0.217811	0.558662
ENSG00000266844	AC093330.1	1.06503	0.532603
ENSG00000272979	AC093388.1	-0.450216	0.697153
ENSG00000284600	AC093390.2	-0.781925	0.167776
ENSG00000277324	AC093462.1	-0.12924	0.93247
ENSG00000239203	AC093484.1	0.307076	0.877288
ENSG00000264739	AC093484.2	-1.05503	0.426461
ENSG00000265401	AC093484.3	0.124218	0.741243
ENSG00000269292	AC093503.2	-0.690253	0.0832708
ENSG00000274904	AC093512.1	0.290178	0.779934
ENSG00000249335	AC093523.1	0.413298	0.818583
ENSG00000261613	AC093525.6	0.106507	0.929766
ENSG00000269937	AC093525.7	-0.42499	0.404077
ENSG00000250602	AC093535.1	1.28097	0.0105304
ENSG00000236529	AC093582.1	-0.338363	0.696949
ENSG00000241269	AC093620.1	0.490858	0.694121
ENSG00000269559	AC093677.2	-1.12541	0.333213
ENSG00000231156	AC093702.1	1.92571	0.0622754
ENSG00000273183	AC093726.2	-0.456322	0.626538
ENSG00000250950	AC093752.2	-0.708189	0.531255
ENSG00000248491	AC093772.1	0.41322	0.796025
ENSG00000273449	AC093788.1	0.795804	0.238246
ENSG00000272950	AC093799.1	-0.8552	0.133159
ENSG00000284968	AC093827.4	0.0138057	0.986882
ENSG00000270681	AC095055.1	-0.214552	0.765371
ENSG00000260296	AC095057.3	0.524126	0.500559
ENSG00000242396	AC096536.3	-0.484422	0.290499
ENSG00000272936	AC096586.1	-0.324138	0.765371
ENSG00000273369	AC096586.2	1.37258	0.186579
ENSG00000277007	AC096642.1	-0.086419	0.960652
ENSG00000229750	AC096649.1	0.153216	0.93482
ENSG00000283839	AC096667.1	0.41359	0.357299
ENSG00000251555	AC096711.2	-0.894757	0.471524
ENSG00000273472	AC096733.2	0.46672	0.484471
ENSG00000261468	AC096921.2	0.314955	0.66723
ENSG00000273486	AC096992.2	0.333929	0.558769
ENSG00000271653	AC097359.3	-0.713546	0.693084
ENSG00000228919	AC097381.1	0.810376	0.172171
ENSG00000245748	AC097382.2	0.380151	0.58781
ENSG00000251095	AC097478.1	1.1248	0.382489
ENSG00000272632	AC097504.2	0.852404	0.32724
ENSG00000248837	AC097512.1	0.0579379	0.984279
ENSG00000248138	AC097515.1	-0.317036	0.725573
ENSG00000248774	AC097534.1	1.08053	0.361305
ENSG00000277855	AC097634.3	0.041626	0.978663
ENSG00000277728	AC097641.2	-0.0561999	0.955677
ENSG00000228162	AC097713.1	-0.22448	0.921623
ENSG00000232732	AC097717.1	-0.111826	0.954243
ENSG00000273233	AC097724.1	0.411714	0.753543
ENSG00000234917	AC098484.2	0.504881	0.625385
ENSG00000248161	AC098487.1	0.109754	0.844552
ENSG00000241520	AC098820.3	1.10414	0.300189
ENSG00000284734	AC099063.4	-0.208644	0.805614
ENSG00000227496	AC099066.2	-1.25858	0.00280157
ENSG00000270426	AC099343.2	-0.238456	0.83666
ENSG00000247033	AC099508.1	0.568816	0.685276
ENSG00000260430	AC099518.1	0.487285	0.756776
ENSG00000261759	AC099518.5	0.311093	0.7345
ENSG00000278389	AC099518.6	-0.174215	0.901489
ENSG00000274698	AC099521.1	0.879217	0.352336
ENSG00000241593	AC099542.1	-0.654452	0.736038
ENSG00000224149	AC099786.2	-1.86879	0.126649
ENSG00000236194	AC099811.1	0.0231567	0.995785
ENSG00000278829	AC099811.5	0.713886	0.541826
ENSG00000224738	AC099850.1	0.337529	0.594623
ENSG00000263916	AC100778.2	-0.584149	0.500328
ENSG00000265496	AC100778.3	0.0102496	0.998329
ENSG00000246731	AC100786.1	-0.579794	0.249808
ENSG00000275516	AC100791.3	-0.524698	0.632043
ENSG00000267042	AC100793.2	0.0854939	0.957502
ENSG00000267765	AC100793.3	-0.62846	0.440799
ENSG00000272010	AC100814.1	0.927145	0.0523526
ENSG00000260955	AC100821.2	0.761759	0.56148
ENSG00000260672	AC100827.4	0.225555	0.916395
ENSG00000265967	AC100830.3	0.362121	0.771543
ENSG00000275527	AC100835.2	0.508824	0.795526
ENSG00000278703	AC100847.1	0.69417	0.179874
ENSG00000254242	AC100849.2	0.361798	0.810522
ENSG00000253266	AC100860.1	-0.00878783	0.998846
ENSG00000273230	AC102953.2	-0.0866335	0.844683
ENSG00000274383	AC103691.1	-0.186628	0.743325
ENSG00000257178	AC103702.1	-0.285899	0.686906
ENSG00000259314	AC103739.2	1.36589	0.179602
ENSG00000259370	AC103740.1	-0.129536	0.772682
ENSG00000259727	AC103740.2	-1.32494	0.0265712
ENSG00000275322	AC103746.1	-0.607094	0.0332822
ENSG00000255496	AC103796.1	-1.32761	0.246685
ENSG00000253420	AC103853.1	3.67451	0.00114011
ENSG00000254141	AC103853.2	0.700862	0.643757
ENSG00000271725	AC103858.1	1.03731	0.0231216
ENSG00000273920	AC103858.2	-0.496882	0.80728
ENSG00000259692	AC104041.1	0.200412	0.922055
ENSG00000249971	AC104116.1	1.00387	0.112839
ENSG00000254035	AC104117.3	-0.122832	0.90757
ENSG00000271862	AC104118.1	0.21333	0.774493
ENSG00000251314	AC104123.1	0.294862	0.62484
ENSG00000225420	AC104134.1	-0.149302	0.918841
ENSG00000236209	AC104135.1	0.123153	0.922457
ENSG00000248858	AC104211.1	2.65367	2.10989e-06
ENSG00000275612	AC104237.2	-2.26173	0.00656797
ENSG00000276668	AC104237.3	-1.10852	0.17362
ENSG00000241770	AC104411.1	-0.487242	0.613083
ENSG00000226862	AC104463.2	-0.764146	0.612051
ENSG00000273204	AC104506.1	0.675648	0.453382
ENSG00000269425	AC104521.1	0.289714	0.892466
ENSG00000267571	AC104532.2	0.53695	0.727389
ENSG00000264007	AC104564.2	1.11947	0.387604
ENSG00000264290	AC104564.3	0.641998	0.564583
ENSG00000265625	AC104564.5	-0.315267	0.799067
ENSG00000244063	AC104653.2	-0.642389	0.347014
ENSG00000270210	AC104695.3	0.990373	0.0144378
ENSG00000270640	AC104695.4	0.809194	0.656294
ENSG00000259792	AC104758.2	1.62727	0.212998
ENSG00000237220	AC104777.3	-0.751529	0.603501
ENSG00000270720	AC104785.1	0.609073	0.491542
ENSG00000260077	AC104794.2	-0.705122	0.00902961
ENSG00000271787	AC104794.4	1.85245	0.217109
ENSG00000251615	AC104825.1	0.237341	0.470288
ENSG00000273487	AC104836.1	-1.09285	0.407881
ENSG00000272502	AC104958.2	-1.37458	0.000197823
ENSG00000261451	AC104964.3	-0.616371	0.49016
ENSG00000272505	AC104964.4	0.19704	0.844962
ENSG00000203392	AC105020.1	0.136841	0.830011
ENSG00000260892	AC105020.4	-0.79527	0.0840182
ENSG00000274515	AC105020.5	-0.502389	0.689761
ENSG00000275454	AC105020.6	0.508273	0.463108
ENSG00000260269	AC105036.3	-0.0340392	0.977008
ENSG00000229498	AC105053.1	2.78589	0.00948294
ENSG00000267257	AC105105.1	0.64198	0.114814
ENSG00000274354	AC105105.4	0.604683	0.556372
ENSG00000276744	AC105137.2	-0.74882	0.67137
ENSG00000177725	AC105206.1	-0.153199	0.911549
ENSG00000252690	AC105339.2	0.265162	0.619648
ENSG00000205959	AC105345.1	0.606032	0.295586
ENSG00000249706	AC105384.1	1.64061	0.0209401
ENSG00000234775	AC105940.2	1.08702	0.466149
ENSG00000260361	AC106028.3	0.687725	0.282818
ENSG00000246792	AC106038.1	-1.19319	0.202082
ENSG00000274092	AC106739.2	0.330378	0.656013
ENSG00000274653	AC106782.6	-0.690057	0.358901
ENSG00000260095	AC106820.3	0.693948	0.643757
ENSG00000260293	AC106820.4	-0.153915	0.77086
ENSG00000260874	AC106820.5	-0.306865	0.742611
ENSG00000260899	AC106886.2	-0.124067	0.913962
ENSG00000249679	AC106897.1	0.144692	0.938979
ENSG00000261051	AC107021.2	0.919066	0.0897896
ENSG00000248468	AC107027.1	0.185533	0.861018
ENSG00000261167	AC107027.3	0.491508	0.144547
ENSG00000257526	AC107032.2	-1.67313	0.0391043
ENSG00000259959	AC107068.1	0.295708	0.402166
ENSG00000224218	AC107072.1	-0.850525	0.373997
ENSG00000236498	AC107081.2	0.518546	0.756417
ENSG00000272744	AC107214.2	-0.109674	0.918979
ENSG00000272970	AC107294.2	0.375775	0.365635
ENSG00000273403	AC107294.3	0.879569	0.156773
ENSG00000272157	AC107373.2	1.02086	0.109157
ENSG00000259891	AC107375.1	-0.30083	0.476851
ENSG00000248254	AC107398.2	-0.155054	0.92845
ENSG00000260657	AC107871.2	0.62848	0.572441
ENSG00000272343	AC107952.2	1.49443	0.0147838
ENSG00000245025	AC107959.1	-0.0214231	0.964821
ENSG00000246130	AC107959.2	0.0925514	0.936224
ENSG00000284948	AC107959.4	-0.120187	0.945351
ENSG00000265478	AC107982.3	0.341245	0.649474
ENSG00000242588	AC108010.1	-0.0851249	0.714724
ENSG00000238273	AC108058.1	2.11944	9.80374e-05
ENSG00000261889	AC108134.2	-0.425259	0.38598
ENSG00000263011	AC108134.4	0.0120181	0.998633
ENSG00000254129	AC108449.1	0.254099	0.865452
ENSG00000259366	AC108449.2	0.0643193	0.893073
ENSG00000259607	AC108449.3	0.817192	0.469868
ENSG00000270919	AC108451.2	0.391356	0.823405
ENSG00000271590	AC108463.3	-0.638231	0.253147
ENSG00000273174	AC108673.2	-1.03932	0.0111428
ENSG00000273437	AC108673.3	1.19278	0.171479
ENSG00000244675	AC108676.1	-2.37838	2.19075e-08
ENSG00000242659	AC108693.2	-0.763925	0.66455
ENSG00000274695	AC108704.1	0.944193	0.333709
ENSG00000278408	AC108861.1	5.11933	1.28036e-15
ENSG00000253645	AC108863.1	1.71979	0.110905
ENSG00000255224	AC109322.1	0.125876	0.811809
ENSG00000249635	AC109361.1	-1.05	0.320587
ENSG00000259940	AC109449.1	0.113361	0.872471
ENSG00000260367	AC109460.1	0.210736	0.783175
ENSG00000261067	AC109460.3	-0.454153	0.64512
ENSG00000223930	AC109779.1	1.6946	1.32032e-06
ENSG00000275995	AC109809.1	-0.542981	0.742367
ENSG00000251199	AC109830.1	-0.615308	0.625319
ENSG00000227279	AC110015.1	-0.223336	0.731527
ENSG00000277152	AC110048.2	0.152867	0.824004
ENSG00000262877	AC110285.2	0.0918889	0.892466
ENSG00000273077	AC110609.1	0.585244	0.649262
ENSG00000243179	AC110769.1	-0.440246	0.815541
ENSG00000270019	AC110769.2	0.377078	0.661866
ENSG00000272650	AC110792.3	0.87643	0.316532
ENSG00000267263	AC111170.2	-0.543428	0.562851
ENSG00000266998	AC111182.1	0.671131	0.612017
ENSG00000272149	AC112211.1	0.774655	0.18549
ENSG00000272717	AC112236.2	1.25002	0.033312
ENSG00000261159	AC112484.3	1.47017	0.136178
ENSG00000269888	AC112491.1	1.27009	0.195524
ENSG00000241886	AC112496.1	0.464788	0.480415
ENSG00000273454	AC112503.2	0.660429	0.564519
ENSG00000214773	AC112512.1	-1.36958	0.377791
ENSG00000224132	AC112715.1	-0.0302592	0.990222
ENSG00000222022	AC112721.1	-0.844494	0.0576107
ENSG00000222032	AC112721.2	-1.18258	0.00259458
ENSG00000263826	AC112907.3	0.103881	0.880551
ENSG00000271555	AC113139.1	0.261848	0.905665
ENSG00000262624	AC113189.1	-0.593019	0.733377
ENSG00000272255	AC113361.1	0.186178	0.934146
ENSG00000274425	AC114271.1	0.112981	0.801438
ENSG00000248927	AC114284.1	-0.813296	0.00899747
ENSG00000250049	AC114316.2	-1.84623	0.00550719
ENSG00000278075	AC114341.1	-0.175998	0.92845
ENSG00000229167	AC114488.1	-0.158532	0.944078
ENSG00000264078	AC114488.3	-0.000994556	0.999283
ENSG00000224409	AC114489.1	1.1535	0.484873
ENSG00000215692	AC114730.1	0.563703	0.309076
ENSG00000230432	AC114803.1	0.0441309	0.988657
ENSG00000261604	AC114947.2	0.21882	0.859954
ENSG00000248240	AC114956.1	0.52772	0.752948
ENSG00000249492	AC114956.3	0.462504	0.569428
ENSG00000251023	AC114980.1	0.186787	0.870923
ENSG00000268601	AC115522.1	1.16896	0.494289
ENSG00000204620	AC115618.1	-0.255192	0.732694
ENSG00000264116	AC116003.1	0.508417	0.638356
ENSG00000254639	AC116021.1	-0.157765	0.887363
ENSG00000262172	AC116025.2	0.16948	0.878678
ENSG00000272360	AC116036.2	0.386174	0.826655
ENSG00000259326	AC116158.1	-0.376974	0.638149
ENSG00000249856	AC116337.3	0.00125817	0.999231
ENSG00000260487	AC116348.1	0.635746	0.584105
ENSG00000261332	AC116348.2	-0.374364	0.68852
ENSG00000261346	AC116348.3	-1.08972	0.529498
ENSG00000214708	AC116407.1	0.122103	0.880958
ENSG00000277511	AC116407.2	0.188875	0.818775
ENSG00000274918	AC116447.1	-0.0291888	0.983755
ENSG00000246308	AC116535.1	0.0146102	0.994134
ENSG00000250126	AC116563.1	0.13438	0.875917
ENSG00000273133	AC116651.1	-1.63944	0.0771565
ENSG00000271009	AC116667.1	0.121287	0.902293
ENSG00000261351	AC116913.1	0.378476	0.534867
ENSG00000273013	AC117490.2	-0.435984	0.815541
ENSG00000257653	AC117498.1	0.245984	0.819455
ENSG00000205041	AC118344.1	-0.0604956	0.934001
ENSG00000228084	AC118553.1	0.828554	0.064637
ENSG00000253392	AC119403.1	-0.00721933	0.998305
ENSG00000237852	AC119800.1	0.219064	0.912831
ENSG00000255366	AC120036.4	1.64306	9.00901e-05
ENSG00000271971	AC120053.1	0.134234	0.838134
ENSG00000278713	AC120114.3	0.436295	0.322991
ENSG00000277010	AC120498.10	-2.01934	0.00126212
ENSG00000261294	AC120498.6	-1.3548	0.240919
ENSG00000273551	AC120498.8	-0.622199	0.0410915
ENSG00000274751	AC120498.9	0.273894	0.843199
ENSG00000225399	AC121247.1	-0.288684	0.597133
ENSG00000270059	AC121493.1	0.433922	0.808366
ENSG00000257829	AC121757.1	2.21456	0.000165261
ENSG00000273987	AC121761.2	0.901253	0.337917
ENSG00000242775	AC121764.3	-0.962368	0.503194
ENSG00000268081	AC123912.1	-0.419703	0.811262
ENSG00000273156	AC124016.2	-0.277633	0.763273
ENSG00000272077	AC124045.1	0.0404794	0.953899
ENSG00000253414	AC124067.2	-2.23183	0.00508307
ENSG00000254290	AC124067.4	0.0272443	0.994901
ENSG00000254991	AC124276.1	-1.3245	0.393792
ENSG00000261845	AC124283.1	-0.0251215	0.991282
ENSG00000262652	AC124283.3	-0.399413	0.834009
ENSG00000276863	AC124319.3	-0.201313	0.918979
ENSG00000260196	AC124798.1	-0.4581	0.130072
ENSG00000249776	AC124854.1	-1.12868	0.211043
ENSG00000257252	AC124947.1	1.51294	0.176223
ENSG00000274630	AC125257.2	0.293862	0.770498
ENSG00000267655	AC125437.1	-0.436565	0.537849
ENSG00000219410	AC125494.1	0.340262	0.557073
ENSG00000269892	AC125494.2	0.0953177	0.903259
ENSG00000258232	AC125611.3	-0.683676	0.0305068
ENSG00000250899	AC125807.2	-0.154606	0.675594
ENSG00000271993	AC126118.1	-0.751694	0.363682
ENSG00000264215	AC126365.1	-0.558278	0.507673
ENSG00000260466	AC126696.2	-1.05053	0.215895
ENSG00000260498	AC126696.3	0.0723108	0.958201
ENSG00000248994	AC126768.2	0.933167	0.428755
ENSG00000275383	AC126773.4	-0.834972	0.600134
ENSG00000263603	AC127024.2	0.21463	0.920335
ENSG00000266490	AC127024.5	0.296576	0.595012
ENSG00000276250	AC127024.6	-0.231935	0.856507
ENSG00000250790	AC127070.2	0.527296	0.443268
ENSG00000261924	AC127496.1	-0.420808	0.810957
ENSG00000262313	AC127496.3	-2.78981	0.0106946
ENSG00000262662	AC127496.4	0.816707	0.551505
ENSG00000262873	AC127496.5	-0.302943	0.835817
ENSG00000263218	AC127496.6	-0.0529904	0.962567
ENSG00000270055	AC127502.2	0.339307	0.402617
ENSG00000260647	AC127537.1	-0.467128	0.683169
ENSG00000266803	AC127540.1	0.58277	0.775459
ENSG00000266824	AC129492.4	0.036873	0.991922
ENSG00000263531	AC130324.1	0.739679	0.584854
ENSG00000275185	AC130324.3	-0.914236	0.483748
ENSG00000277597	AC130343.2	-0.754652	0.493979
ENSG00000257879	AC130415.1	2.33776	0.0547277
ENSG00000260934	AC130456.5	0.740892	0.527827
ENSG00000276564	AC130650.2	-0.0859561	0.952064
ENSG00000256955	AC131009.2	-0.387113	0.81698
ENSG00000273568	AC131009.3	0.107967	0.907001
ENSG00000275871	AC131025.2	0.862492	0.364631
ENSG00000276292	AC131159.1	-0.538043	0.786854
ENSG00000277873	AC131159.2	-0.621273	0.261798
ENSG00000277186	AC131212.1	0.409099	0.794895
ENSG00000274859	AC131238.1	0.432867	0.816309
ENSG00000228061	AC131571.1	-1.75593	0.256585
ENSG00000250906	AC131953.1	1.09195	0.39996
ENSG00000250777	AC131956.2	-0.720959	0.362612
ENSG00000268403	AC132192.2	0.333323	0.462038
ENSG00000251031	AC132803.1	-1.25333	0.0287653
ENSG00000260563	AC132872.1	-0.227806	0.666083
ENSG00000264548	AC132872.2	-2.07334	0.11936
ENSG00000275888	AC132872.3	-0.35447	0.680212
ENSG00000273113	AC133528.1	0.317689	0.63689
ENSG00000278716	AC133540.1	0.636472	0.548554
ENSG00000260570	AC133550.1	-0.128069	0.923338
ENSG00000261766	AC133550.2	-0.102436	0.929086
ENSG00000275494	AC133552.5	-0.202683	0.767976
ENSG00000253256	AC134043.1	0.553034	0.780531
ENSG00000260166	AC134312.3	-0.500614	0.749209
ENSG00000261327	AC134312.5	-1.54851	5.75502e-08
ENSG00000261693	AC134682.1	0.374287	0.83422
ENSG00000244380	AC134772.1	0.0636418	0.87632
ENSG00000262721	AC135048.2	0.00615454	0.999178
ENSG00000275263	AC135048.3	-0.555262	0.443268
ENSG00000232748	AC135050.1	-0.099081	0.909066
ENSG00000260911	AC135050.3	0.00303934	0.999178
ENSG00000262766	AC135050.5	-0.451883	0.530531
ENSG00000278133	AC135050.6	0.0180838	0.977406
ENSG00000269947	AC135178.5	-0.814	0.168673
ENSG00000277895	AC135279.3	0.77841	0.32208
ENSG00000272742	AC135457.1	0.178079	0.906914
ENSG00000272182	AC135507.1	-0.0605704	0.928407
ENSG00000261546	AC135782.3	0.303675	0.854275
ENSG00000272864	AC135803.1	-1.08076	0.491542
ENSG00000251661	AC136475.1	0.0796257	0.922457
ENSG00000254910	AC136475.2	0.394943	0.587778
ENSG00000255328	AC136475.5	1.60321	0.00947506
ENSG00000250999	AC136604.3	0.192451	0.836535
ENSG00000257000	AC137590.1	-0.877485	0.59698
ENSG00000223343	AC137630.1	0.351012	0.67596
ENSG00000235236	AC137630.2	0.361559	0.737974
ENSG00000272434	AC137630.3	0.28617	0.602837
ENSG00000273211	AC137630.4	-0.215406	0.854949
ENSG00000276727	AC137834.2	-0.217447	0.805824
ENSG00000260279	AC137932.1	0.0124574	0.998633
ENSG00000261253	AC137932.2	-3.74097	8.5407e-06
ENSG00000268218	AC137932.3	0.313829	0.847901
ENSG00000224888	AC138028.2	-0.0549619	0.937586
ENSG00000259813	AC138028.3	0.089901	0.966496
ENSG00000260121	AC138028.4	-0.127626	0.828607
ENSG00000260617	AC138028.5	-0.00873632	0.998588
ENSG00000278341	AC138028.6	-0.165086	0.805923
ENSG00000267288	AC138150.2	0.528326	0.448136
ENSG00000264456	AC138207.4	-0.0792626	0.928892
ENSG00000183154	AC138356.1	0.0461381	0.976031
ENSG00000278467	AC138393.3	-0.515559	0.572259
ENSG00000256312	AC138466.1	-0.55915	0.779963
ENSG00000261273	AC138512.1	0.0278118	0.995785
ENSG00000274253	AC138649.1	1.31402	0.181291
ENSG00000272172	AC138696.2	-0.301852	0.642587
ENSG00000260017	AC138811.1	-0.0349291	0.991546
ENSG00000250909	AC138956.1	0.151099	0.893606
ENSG00000262898	AC139099.2	2.00137	0.147514
ENSG00000267251	AC139100.1	0.696458	0.700894
ENSG00000278000	AC139100.2	0.837776	0.363977
ENSG00000229848	AC139149.1	0.11793	0.818775
ENSG00000262049	AC139530.1	-0.0364019	0.947749
ENSG00000275902	AC139530.3	-0.0874284	0.93117
ENSG00000251600	AC139713.2	-0.106753	0.939694
ENSG00000278126	AC139768.1	-0.298083	0.485842
ENSG00000247679	AC139795.2	-0.122013	0.812526
ENSG00000233799	AC139887.1	-0.0957734	0.934001
ENSG00000272588	AC139887.4	-0.285292	0.778053
ENSG00000261093	AC141586.3	0.605588	0.289974
ENSG00000276728	AC142472.1	-0.0301598	0.966556
ENSG00000258210	AC144548.1	0.218213	0.900924
ENSG00000261888	AC144831.1	0.878493	5.50641e-07
ENSG00000255495	AC145124.1	-0.217573	0.693766
ENSG00000235296	AC145207.1	-0.265509	0.865039
ENSG00000262413	AC145207.2	-0.125571	0.78023
ENSG00000262831	AC145207.3	0.589763	0.029585
ENSG00000263585	AC145207.4	-0.000671675	0.999231
ENSG00000263731	AC145207.5	-0.0390387	0.946366
ENSG00000264769	AC145207.8	0.35319	0.669475
ENSG00000251417	AC145285.2	-0.172693	0.852023
ENSG00000260796	AC145285.3	0.28858	0.832264
ENSG00000275807	AC145285.6	-0.406465	0.366572
ENSG00000265055	AC145343.1	-1.53533	0.19342
ENSG00000274427	AC145423.2	0.316349	0.78171
ENSG00000278112	AC145423.3	-1.50692	0.0618976
ENSG00000244459	AC147067.1	0.241509	0.566854
ENSG00000262075	AC174065.1	0.530229	0.317544
ENSG00000273069	AC211433.2	0.433012	0.777333
ENSG00000272843	AC211476.2	-0.476594	0.649645
ENSG00000232828	AC231533.1	-0.646061	0.653811
ENSG00000235078	AC231981.1	0.417755	0.24765
ENSG00000270012	AC232271.1	-0.150335	0.806386
ENSG00000261600	AC233266.2	0.678756	0.436555
ENSG00000233250	AC233728.1	1.09672	0.238446
ENSG00000272115	AC233992.3	-2.12764	0.112673
ENSG00000236263	AC234582.2	0.33594	0.759152
ENSG00000269902	AC234772.3	1.41501	0.206186
ENSG00000261101	AC234775.3	0.067447	0.917428
ENSG00000232721	AC239800.2	0.28913	0.844157
ENSG00000227733	AC239809.3	-0.757625	0.125499
ENSG00000237188	AC242426.2	1.2485	0.3514
ENSG00000278431	AC243547.2	0.0990976	0.934976
ENSG00000259774	AC243562.3	0.104888	0.949768
ENSG00000233030	AC243772.2	0.964811	0.03605
ENSG00000275552	AC243965.2	-1.25739	0.0395616
ENSG00000285184	AC244033.2	0.196053	0.64056
ENSG00000276170	AC244153.1	-0.0655021	0.919484
ENSG00000238039	AC244197.2	0.426168	0.819894
ENSG00000234998	AC244453.3	-0.522992	0.487357
ENSG00000272108	AC244517.1	0.614917	0.604995
ENSG00000279068	AC244517.6	-1.4418	0.314447
ENSG00000274422	AC245060.5	0.128083	0.840133
ENSG00000272824	AC245100.7	0.70388	0.318216
ENSG00000280195	AC245140.2	0.106715	0.780637
ENSG00000285018	AC245140.3	-0.0531999	0.921623
ENSG00000274265	AC245297.3	-0.224695	0.724135
ENSG00000253853	AC246817.1	-0.161586	0.829721
ENSG00000232545	AC253536.3	0.285394	0.70317
ENSG00000275426	AC253576.2	-0.263601	0.88075
ENSG00000272482	AC254633.1	1.86735	3.39546e-12
ENSG00000287110	ACAD9-DT	0.490604	0.419935
ENSG00000229325	ACAP2-IT1	-0.152832	0.900888
ENSG00000234478	ACBD3-AS1	0.345137	0.671841
ENSG00000204581	ACOXL-AS1	0.948722	0.0622754
ENSG00000180139	ACTA2-AS1	0.598351	0.000209443
ENSG00000259062	ACTN1-DT	0.45266	0.506758
ENSG00000228857	ACTR3-AS1	-0.00267811	0.999169
ENSG00000229589	ACVR2B-AS1	0.272409	0.634051
ENSG00000283907	AD000090.1	-0.154703	0.930259
ENSG00000267439	AD000671.3	0.413125	0.628305
ENSG00000253535	ADAM7-AS1	0.0428432	0.991295
ENSG00000249421	ADAMTS19-AS1	-1.28292	0.353758
ENSG00000241684	ADAMTS9-AS2	1.46426	1.85727e-05
ENSG00000203804	ADAMTSL4-AS1	0.526784	0.393381
ENSG00000237781	ADAMTSL4-AS2	-0.318622	0.657572
ENSG00000290554	ADCY10P1	-0.908379	0.149546
ENSG00000203876	ADD3-AS1	0.739096	0.256233
ENSG00000267169	ADGRL1-AS1	0.0180712	0.978673
ENSG00000272734	ADIRF-AS1	-0.454094	0.255506
ENSG00000254554	ADM-DT	0.745058	0.141387
ENSG00000259456	ADNP-AS1	0.0452506	0.950696
ENSG00000260898	ADPGK-AS1	0.478643	0.650597
ENSG00000263335	AF001548.2	0.655058	0.64484
ENSG00000267388	AF038458.2	0.282528	0.86737
ENSG00000267786	AF038458.3	-0.107688	0.940683
ENSG00000272163	AF106564.1	0.32521	0.237464
ENSG00000259081	AF111169.3	-0.172518	0.934001
ENSG00000235609	AF127577.4	0.231813	0.464358
ENSG00000232884	AF127936.2	0.0469637	0.98779
ENSG00000231125	AF129075.1	0.100149	0.936051
ENSG00000273254	AF129075.2	0.31817	0.780942
ENSG00000272991	AF129408.1	-0.792307	0.648714
ENSG00000227330	AF130417.1	-3.65608	0.00379475
ENSG00000254556	AF131215.2	0.749075	0.671153
ENSG00000254936	AF131215.4	0.898065	0.543589
ENSG00000255310	AF131215.5	0.295194	0.344257
ENSG00000269918	AF131215.6	0.0427346	0.940268
ENSG00000270076	AF131215.7	-1.05629	0.47877
ENSG00000280273	AF131216.4	0.197273	0.797012
ENSG00000232855	AF165147.1	1.8541	6.12356e-13
ENSG00000253576	AF181450.1	1.9965	0.0778084
ENSG00000260651	AF213884.3	-0.641681	0.584506
ENSG00000223697	AF230666.1	-0.221381	0.816978
ENSG00000271743	AF287957.1	-0.515901	0.642977
ENSG00000272620	AFAP1-AS1	0.265355	0.402085
ENSG00000260101	AFTPH-DT	-0.490449	0.403322
ENSG00000250131	AGA-DT	0.448007	0.352336
ENSG00000235529	AGAP1-IT1	-0.232097	0.892466
ENSG00000255737	AGAP2-AS1	-0.1657	0.40466
ENSG00000231028	AHI1-DT	0.171475	0.840643
ENSG00000229425	AJ009632.2	0.930861	0.212206
ENSG00000274248	AJ011932.1	0.55418	0.264449
ENSG00000280604	AJ239328.1	1.2285	0.0248908
ENSG00000258457	AJUBA-DT	-0.313327	0.562851
ENSG00000263004	AKAP1-DT	0.148744	0.857483
ENSG00000273424	AL008582.1	0.655309	0.742902
ENSG00000273287	AL008718.2	1.79843	0.0965285
ENSG00000273353	AL008718.3	-0.766428	0.662161
ENSG00000272977	AL008721.2	-0.204671	0.61109
ENSG00000271984	AL008726.1	0.669783	0.226552
ENSG00000260316	AL008727.1	0.841852	0.580064
ENSG00000215022	AL008729.1	-0.684573	0.151148
ENSG00000272379	AL008729.2	-0.18512	0.867299
ENSG00000272848	AL009176.1	0.258024	0.676318
ENSG00000228172	AL020996.1	-0.0721875	0.916619
ENSG00000270031	AL020997.3	0.131234	0.915067
ENSG00000213062	AL021068.1	0.260088	0.626592
ENSG00000235052	AL021154.1	-0.906309	0.570625
ENSG00000272316	AL021368.2	-0.153354	0.803681
ENSG00000275894	AL021578.1	-0.463146	0.661866
ENSG00000225450	AL021707.1	0.36869	0.68321
ENSG00000228274	AL021707.2	0.0165506	0.979347
ENSG00000230149	AL021707.3	-0.206255	0.783935
ENSG00000230912	AL021707.4	-1.34702	0.239037
ENSG00000244491	AL021707.5	0.854904	0.24302
ENSG00000272669	AL021707.6	0.00222412	0.999178
ENSG00000273076	AL021707.7	-0.803195	0.440799
ENSG00000273096	AL021707.8	-0.0277363	0.995785
ENSG00000272468	AL021807.1	0.684766	0.0883007
ENSG00000269919	AL022067.1	0.871477	0.496467
ENSG00000226310	AL022157.1	-0.239181	0.817322
ENSG00000226375	AL022310.1	-2.65971	0.000158837
ENSG00000279738	AL022311.1	0.136112	0.793309
ENSG00000228719	AL022313.2	0.561037	0.693323
ENSG00000272720	AL022322.1	-0.165146	0.818387
ENSG00000279080	AL022322.2	1.82234	0.220443
ENSG00000272836	AL022328.1	0.345249	0.770051
ENSG00000273188	AL022328.3	-0.768749	0.661531
ENSG00000228201	AL022341.1	0.0109611	0.996685
ENSG00000262528	AL022341.2	-0.761488	0.452325
ENSG00000259869	AL022344.2	-0.0378556	0.979929
ENSG00000233981	AL022396.1	3.18542	0.012671
ENSG00000227192	AL023581.2	0.0742555	0.960086
ENSG00000272209	AL023583.1	1.36378	0.0555119
ENSG00000274825	AL023803.2	-0.21126	0.905263
ENSG00000270638	AL023806.1	0.24502	0.827875
ENSG00000270828	AL023806.2	0.910603	0.576763
ENSG00000272476	AL024507.2	0.0500938	0.922457
ENSG00000275438	AL031008.1	-1.5428	0.0931097
ENSG00000271755	AL031118.1	-0.0797845	0.962002
ENSG00000268575	AL031282.2	0.296545	0.476652
ENSG00000237899	AL031289.1	0.452303	0.779333
ENSG00000278206	AL031320.2	-0.366931	0.745724
ENSG00000272432	AL031432.3	1.32322	0.212492
ENSG00000284602	AL031432.4	-0.0389562	0.96162
ENSG00000284657	AL031432.5	0.129794	0.929724
ENSG00000233739	AL031587.2	-0.735914	0.647737
ENSG00000272582	AL031587.3	-0.0563883	0.935245
ENSG00000284633	AL031590.1	-0.676746	0.31297
ENSG00000280434	AL031595.3	-0.798964	0.119837
ENSG00000224228	AL031599.1	-0.874479	0.138139
ENSG00000261641	AL031600.3	0.112872	0.860332
ENSG00000277829	AL031651.2	-0.236752	0.846574
ENSG00000267882	AL031666.2	-1.5002	0.300347
ENSG00000273451	AL031666.3	0.44748	0.829412
ENSG00000273951	AL031667.3	-0.8682	0.44535
ENSG00000278383	AL031673.1	0.778383	0.240834
ENSG00000283757	AL031686.1	0.702334	0.700836
ENSG00000275092	AL031710.2	-1.99112	0.149522
ENSG00000261505	AL031714.1	0.241822	0.656716
ENSG00000272465	AL031768.1	-0.0168481	0.995785
ENSG00000231329	AL031772.1	0.537342	0.74794
ENSG00000272345	AL031775.1	0.511487	0.165262
ENSG00000272402	AL031775.2	0.973929	0.48808
ENSG00000279833	AL031846.2	0.285459	0.789091
ENSG00000271746	AL031848.2	0.90161	0.427055
ENSG00000272277	AL031963.3	-0.0601952	0.93117
ENSG00000260920	AL031985.3	-0.781642	0.00103409
ENSG00000271218	AL033384.2	0.0193913	0.997957
ENSG00000236528	AL033528.2	0.29032	0.813764
ENSG00000279175	AL033543.1	-0.706715	0.634325
ENSG00000271367	AL034374.1	0.910575	0.118455
ENSG00000205444	AL034376.1	0.982656	0.0497565
ENSG00000226698	AL034380.1	1.47336	0.291593
ENSG00000235189	AL034405.1	0.831789	0.582867
ENSG00000284716	AL034417.3	0.403472	0.786057
ENSG00000284747	AL034417.4	-0.279334	0.709637
ENSG00000236772	AL034550.1	0.267431	0.825934
ENSG00000260257	AL035071.1	0.101709	0.846393
ENSG00000277938	AL035252.3	-0.393673	0.525617
ENSG00000230498	AL035409.1	-0.364704	0.494182
ENSG00000234139	AL035420.1	2.13519	0.0486061
ENSG00000234147	AL035446.1	-0.982652	0.0274875
ENSG00000250917	AL035458.2	0.637578	0.568648
ENSG00000275632	AL035461.2	-0.967211	0.14385
ENSG00000229771	AL035665.1	0.829917	0.584232
ENSG00000284830	AL049557.1	-0.0528276	0.979347
ENSG00000226526	AL049569.1	-0.0910571	0.907391
ENSG00000258646	AL049780.1	0.181786	0.892621
ENSG00000224066	AL049795.1	0.379467	0.506801
ENSG00000260464	AL049796.1	-0.138019	0.857059
ENSG00000259018	AL049829.2	-0.0778797	0.970023
ENSG00000258525	AL049830.3	-0.558181	0.731951
ENSG00000259969	AL049838.1	0.0618242	0.92268
ENSG00000269910	AL049840.2	0.892694	0.333213
ENSG00000269940	AL049840.3	0.0503135	0.903503
ENSG00000269958	AL049840.4	0.0166213	0.971059
ENSG00000270108	AL049840.5	-0.115589	0.838275
ENSG00000258526	AL049875.1	0.145884	0.878725
ENSG00000266993	AL050343.1	0.561509	0.360073
ENSG00000270792	AL050403.2	-0.409079	0.754976
ENSG00000232358	AL050404.1	-0.929894	0.123028
ENSG00000281021	AL078581.3	1.08307	0.529498
ENSG00000237927	AL078604.2	0.0878561	0.956476
ENSG00000255252	AL078612.1	0.425459	0.343389
ENSG00000273004	AL078644.2	0.300665	0.692625
ENSG00000258535	AL079307.1	-0.0903962	0.947749
ENSG00000227627	AL080276.2	0.532951	0.411587
ENSG00000271789	AL080317.2	-0.26	0.654293
ENSG00000272356	AL080317.3	-0.034305	0.962002
ENSG00000240591	AL096701.3	0.107106	0.931082
ENSG00000273821	AL096828.3	-0.781245	0.406722
ENSG00000271857	AL096865.1	0.0496973	0.949291
ENSG00000260669	AL096870.2	0.513155	0.587493
ENSG00000276603	AL109614.1	0.250652	0.793174
ENSG00000272491	AL109659.2	-0.675033	0.718247
ENSG00000226849	AL109811.1	0.00757429	0.99769
ENSG00000285091	AL109840.2	-0.944377	0.460112
ENSG00000277558	AL109923.1	0.508721	0.762614
ENSG00000277287	AL109976.1	-0.445381	0.28069
ENSG00000258749	AL110504.1	-0.495991	0.806676
ENSG00000258663	AL117190.2	-0.166353	0.932324
ENSG00000259515	AL117209.1	0.159226	0.81393
ENSG00000275457	AL117332.1	0.237951	0.585589
ENSG00000276649	AL117335.1	-0.482316	0.454786
ENSG00000269952	AL117336.2	1.539	0.00429791
ENSG00000272983	AL117339.4	0.152113	0.823405
ENSG00000237481	AL117350.1	2.26813	0.0678396
ENSG00000273759	AL117379.1	0.101737	0.917927
ENSG00000268858	AL118506.1	-0.103223	0.753543
ENSG00000223393	AL118511.1	-0.881641	0.00780295
ENSG00000276223	AL118522.1	-0.0209623	0.997239
ENSG00000259113	AL118556.1	0.838076	0.625319
ENSG00000271780	AL118558.3	-0.35002	0.411923
ENSG00000272444	AL118558.4	-0.227694	0.841386
ENSG00000259977	AL121578.3	-3.11379	9.15246e-19
ENSG00000277692	AL121583.1	-1.94748	0.0133772
ENSG00000271228	AL121655.1	-0.107229	0.939429
ENSG00000231010	AL121672.1	-0.00970681	0.998588
ENSG00000273289	AL121672.3	0.37849	0.75193
ENSG00000230309	AL121718.1	-1.35924	0.0552637
ENSG00000238258	AL121748.2	-0.0503913	0.941836
ENSG00000273312	AL121749.1	-0.449441	0.347348
ENSG00000268628	AL121761.2	0.33197	0.837282
ENSG00000274414	AL121772.1	0.112574	0.925071
ENSG00000276952	AL121772.3	-0.570649	0.47582
ENSG00000250681	AL121796.1	2.24536	3.94657e-05
ENSG00000232675	AL121830.1	1.40765	0.365238
ENSG00000273619	AL121832.2	0.159164	0.800098
ENSG00000275437	AL121832.3	-0.428523	0.526921
ENSG00000277425	AL121890.4	0.0239094	0.994766
ENSG00000278816	AL121890.5	-0.639709	0.707782
ENSG00000270001	AL121894.2	0.259335	0.714724
ENSG00000278035	AL121895.2	1.74267	0.107751
ENSG00000275223	AL121906.2	0.201093	0.873635
ENSG00000225806	AL121917.1	0.0217623	0.991295
ENSG00000273262	AL121928.1	0.713839	0.407816
ENSG00000272009	AL121944.1	-0.147149	0.878961
ENSG00000225279	AL121987.1	0.121267	0.896867
ENSG00000227741	AL121987.2	-0.611476	0.0965285
ENSG00000237301	AL121992.1	0.830114	0.402724
ENSG00000272510	AL121992.3	-0.67283	0.69069
ENSG00000258824	AL122035.1	0.087986	0.887746
ENSG00000272909	AL122035.2	0.211594	0.65435
ENSG00000268333	AL132655.1	-0.739992	0.673531
ENSG00000268649	AL132655.2	-1.32586	0.382416
ENSG00000226578	AL132657.1	1.43096	0.215154
ENSG00000230805	AL132709.1	-0.743698	0.589626
ENSG00000258744	AL132800.1	0.0864652	0.869695
ENSG00000258682	AL132989.1	0.524592	0.58442
ENSG00000257522	AL133166.1	-2.20931	2.02804e-06
ENSG00000236662	AL133215.1	0.217214	0.878314
ENSG00000273162	AL133215.2	-0.907978	0.147236
ENSG00000273828	AL133227.1	-0.0066686	0.998329
ENSG00000232043	AL133230.1	0.343365	0.766132
ENSG00000276334	AL133243.2	-0.0513988	0.940683
ENSG00000276517	AL133243.3	-0.136336	0.862282
ENSG00000272754	AL133245.1	0.731344	0.616874
ENSG00000260954	AL133297.1	-0.336949	0.818775
ENSG00000251194	AL133330.1	-0.645373	0.20632
ENSG00000260000	AL133338.1	-0.108657	0.848252
ENSG00000278231	AL133342.1	-2.00645	0.150048
ENSG00000258642	AL133371.1	-1.61416	0.251189
ENSG00000259130	AL133371.3	-2.45729	0.0117664
ENSG00000245261	AL133375.1	-1.51534	0.206488
ENSG00000227388	AL133410.1	-1.02182	0.220213
ENSG00000228843	AL133410.2	-0.117833	0.894893
ENSG00000234961	AL133415.1	-0.471936	0.00169814
ENSG00000238280	AL133417.1	0.26892	0.803917
ENSG00000258572	AL133467.1	-0.00111122	0.999453
ENSG00000235426	AL133481.1	0.737678	0.204894
ENSG00000273893	AL133520.1	-0.00714637	0.996685
ENSG00000258982	AL133523.1	-0.203648	0.704783
ENSG00000272892	AL133551.1	0.167116	0.928536
ENSG00000260830	AL135744.1	0.29798	0.818438
ENSG00000236514	AL135791.1	-0.0389285	0.982912
ENSG00000258875	AL135818.1	0.437003	0.806961
ENSG00000258620	AL135838.1	0.531073	0.790379
ENSG00000266680	AL135905.1	-0.0762891	0.892466
ENSG00000272447	AL135925.1	-0.181103	0.721659
ENSG00000261242	AL136038.3	-0.217416	0.922457
ENSG00000274015	AL136038.5	-0.157511	0.838134
ENSG00000270412	AL136084.3	1.1011	0.0874921
ENSG00000269967	AL136115.2	0.0933197	0.945989
ENSG00000272114	AL136131.3	0.0103568	0.993987
ENSG00000270755	AL136141.1	-1.29411	0.332272
ENSG00000276434	AL136221.1	0.0292965	0.995785
ENSG00000259321	AL136295.2	-0.162698	0.835817
ENSG00000276698	AL136295.6	0.0522105	0.959601
ENSG00000278784	AL136295.7	0.0732947	0.912831
ENSG00000276436	AL136301.1	-1.50746	0.206934
ENSG00000272223	AL136304.1	-0.594838	0.54954
ENSG00000254821	AL136309.4	0.591115	0.610963
ENSG00000229728	AL136531.1	0.214959	0.864898
ENSG00000274718	AL136964.1	0.169616	0.829894
ENSG00000237280	AL136982.3	0.747643	0.498228
ENSG00000272033	AL136984.1	-1.27296	0.190862
ENSG00000224407	AL136988.1	0.550588	0.220569
ENSG00000269125	AL137002.1	-1.28119	0.40139
ENSG00000283828	AL137002.2	-0.464479	0.209769
ENSG00000272341	AL137003.2	0.396354	0.185407
ENSG00000229116	AL137026.1	0.66579	0.122185
ENSG00000274270	AL137060.1	0.929643	0.179512
ENSG00000283078	AL137077.2	-0.698947	0.278571
ENSG00000272084	AL137127.1	0.738176	0.0678396
ENSG00000232807	AL137186.2	0.533562	0.0768202
ENSG00000259053	AL137230.2	-0.496574	0.419636
ENSG00000270008	AL137247.1	0.364796	0.590551
ENSG00000259088	AL137779.2	-0.251806	0.835333
ENSG00000261553	AL137782.1	-0.943128	0.0317219
ENSG00000277801	AL138478.1	0.198274	0.920335
ENSG00000284966	AL138689.2	-0.8373	0.248441
ENSG00000244332	AL138759.1	-0.0894578	0.922792
ENSG00000272572	AL138762.1	-0.367152	0.561009
ENSG00000196566	AL138767.1	-0.0110816	0.992094
ENSG00000275329	AL138781.2	0.769935	0.274293
ENSG00000277151	AL138820.1	-0.662983	0.490478
ENSG00000230648	AL138831.1	-0.318646	0.836305
ENSG00000272248	AL138831.2	-0.234358	0.911497
ENSG00000228793	AL138881.1	-0.387158	0.5461
ENSG00000285278	AL138885.3	-0.369167	0.581994
ENSG00000235119	AL138895.1	-0.820512	0.329018
ENSG00000276809	AL138955.1	-0.968428	0.272498
ENSG00000277831	AL138960.1	0.317311	0.813809
ENSG00000228886	AL138963.1	0.385124	0.860387
ENSG00000273149	AL138963.3	0.242666	0.0874921
ENSG00000277368	AL138966.2	-0.193617	0.836777
ENSG00000277763	AL138995.1	-0.208991	0.81059
ENSG00000277386	AL138999.1	0.572162	0.478423
ENSG00000258378	AL139021.1	0.63967	0.683184
ENSG00000259118	AL139022.1	0.326111	0.601931
ENSG00000272158	AL139022.2	0.116666	0.936909
ENSG00000234426	AL139042.1	5.02597	0.00108974
ENSG00000238221	AL139095.4	-0.457471	0.643887
ENSG00000258377	AL139099.1	-0.17177	0.746164
ENSG00000258450	AL139099.2	0.655802	0.652819
ENSG00000277218	AL139123.1	0.622067	0.701602
ENSG00000273450	AL139124.1	-0.219936	0.922295
ENSG00000248458	AL139147.1	1.54192	0.0727779
ENSG00000230615	AL139220.2	0.0741898	0.895007
ENSG00000230928	AL139241.1	0.215138	0.865452
ENSG00000272008	AL139274.2	0.126198	0.928513
ENSG00000240731	AL139287.1	0.0977343	0.892466
ENSG00000259049	AL139317.3	-0.450874	0.48209
ENSG00000234699	AL139339.1	-0.714797	0.437392
ENSG00000273485	AL139339.2	-0.249222	0.793555
ENSG00000254419	AL139349.1	-0.040318	0.991282
ENSG00000230490	AL139383.1	-1.19536	0.241439
ENSG00000274922	AL139384.1	0.101185	0.92397
ENSG00000277159	AL139384.2	-0.130028	0.840133
ENSG00000231863	AL139393.1	2.458	1.82324e-14
ENSG00000284391	AL139398.1	-1.92402	1.81406e-06
ENSG00000277687	AL139407.1	-0.139252	0.852132
ENSG00000272078	AL139423.1	0.416974	0.501268
ENSG00000284642	AL139424.2	0.0535216	0.959614
[truncated: 3,840 more rows]

## Sheet: S6
Differentially expressed (FDR<0.01; Log2(FC) ≥ |1|)					Venn Diagram Lists From Figure 2
P-UP	NP-UP	P-DOWN	NP-DOWN		Common UP	Common DOWN	Only Preg UP	Only NP-UP	Only Preg-DOWN	Only NP-DOWN
AC002456.1	AC002456.1	AC004917.1	AC002480.3		AC002456.1	AC004917.1	AC016924.1	AC004817.3	AL133371.3	AC002480.3
AC004160.1	AC004160.1	AC005050.1	AC004917.1		AC004160.1	AC005050.1	AC079298.3	AC024337.1	AP006621.2	AF130417.1
AC004585.1	AC004585.1	AC008522.1	AC005050.1		AC004585.1	AC008522.1	AC093535.1	AC073571.1	IL6-AS1	CNIH3-AS2
AC005828.5	AC004817.3	AC022509.3	AC008522.1		AC005828.5	AC022509.3	C1QTNF1-AS1	AC103853.1		ENSG00000285671
AC007743.1	AC005828.5	AC036214.1	AC022509.3		AC007743.1	AC036214.1		AC105053.1		ENSG00000289252
AC010735.2	AC007743.1	AC053503.4	AC036214.1		AC010735.2	AC053503.4		AL139042.1		LINC01483
AC011503.1	AC010735.2	AC078880.3	AC053503.4		AC011503.1	AC078880.3		AL158068.2		LINC01603
AC016924.1	AC011503.1	AC091182.2	AC078880.3		AC018450.1	AC091182.2		AL451123.1
AC018450.1	AC018450.1	AC092127.2	AC091182.2		AC020558.1	AC092127.2		CEDORA
AC020558.1	AC020558.1	AC099066.2	AC092127.2		AC022239.1	AC099066.2		ENSG00000286649
AC022239.1	AC022239.1	AC104237.2	AC099066.2		AC023154.1	AC104237.2		IL1R1-AS1
AC023154.1	AC023154.1	AC104958.2	AC104237.2		AC025280.1	AC104958.2		LINC01832
AC025280.1	AC024337.1	AC108676.1	AC104958.2		AC025423.4	AC108676.1		LINC02171
AC025423.4	AC025280.1	AC112721.2	AC108676.1		AC027117.1	AC112721.2		LINC02223
AC027117.1	AC025423.4	AC114316.2	AC112721.2		AC027288.3	AC114316.2		LINC02349
AC027288.3	AC027117.1	AC120498.10	AC114316.2		AC044849.1	AC120498.10		SMC2-DT
AC044849.1	AC027288.3	AC124067.2	AC120498.10		AC078850.1	AC124067.2		WDR86-AS1
AC078850.1	AC044849.1	AC134312.5	AC124067.2		AC079298.1	AC134312.5
AC079298.1	AC073571.1	AC137932.2	AC134312.5		AC079610.2	AC137932.2
AC079298.3	AC078850.1	AL022310.1	AC137932.2		AC091563.1	AL022310.1
AC079610.2	AC079298.1	AL121578.3	AF130417.1		AC104211.1	AL121578.3
AC091563.1	AC079610.2	AL133166.1	AL022310.1		AC108058.1	AL133166.1
AC093535.1	AC091563.1	AL133371.3	AL121578.3		AC108861.1	AL139398.1
AC104211.1	AC103853.1	AL139398.1	AL133166.1		AC109779.1	AL353751.1
AC108058.1	AC104211.1	AL353751.1	AL139398.1		AC120036.4	AL359834.1
AC108861.1	AC105053.1	AL359834.1	AL353751.1		AC121757.1	AP001476.1
AC109779.1	AC108058.1	AP001476.1	AL359834.1		AC136475.5	AP005233.2
AC120036.4	AC108861.1	AP005233.2	AP001476.1		AC254633.1	APCDD1L-DT
AC121757.1	AC109779.1	AP006621.2	AP005233.2		ADAMTS9-AS2	C3orf36
AC136475.5	AC120036.4	APCDD1L-DT	APCDD1L-DT		AF165147.1	CLDN14-AS1
AC254633.1	AC121757.1	C3orf36	C3orf36		AL117336.2	DELEC1
ADAMTS9-AS2	AC136475.5	CLDN14-AS1	CLDN14-AS1		AL121796.1	DHCR24-DT
AF165147.1	AC254633.1	DELEC1	CNIH3-AS2		AL139393.1	DIRC3
AL117336.2	ADAMTS9-AS2	DHCR24-DT	DELEC1		AL158206.1	DIRC3-AS1
AL121796.1	AF165147.1	DIRC3	DHCR24-DT		AL161421.1	ENSG00000285722
AL139393.1	AL117336.2	DIRC3-AS1	DIRC3		AL162497.1	ENSG00000286695
AL158206.1	AL121796.1	ENSG00000285722	DIRC3-AS1		AL162584.1	ENSG00000286878
AL161421.1	AL139042.1	ENSG00000286695	ENSG00000285671		AL353150.1	ENSG00000287171
AL162497.1	AL139393.1	ENSG00000286878	ENSG00000285722		AL354813.1	ENSG00000287200
AL162584.1	AL158068.2	ENSG00000287171	ENSG00000286695		AL356515.1	ENSG00000287516
AL353150.1	AL158206.1	ENSG00000287200	ENSG00000286878		AL358334.2	ENSG00000287625
AL354813.1	AL161421.1	ENSG00000287516	ENSG00000287171		AL390957.1	ENSG00000287815
AL356515.1	AL162497.1	ENSG00000287625	ENSG00000287200		AL445183.2	ENSG00000288754
AL358334.2	AL162584.1	ENSG00000287815	ENSG00000287516		AL583856.2	ENSG00000288781
AL390957.1	AL353150.1	ENSG00000288754	ENSG00000287625		AP001056.2	ENSG00000288979
AL445183.2	AL354813.1	ENSG00000288781	ENSG00000287815		AP001347.1	ENSG00000289224
AL583856.2	AL356515.1	ENSG00000288979	ENSG00000288754		AP001781.1	ENSG00000289526
AP001056.2	AL358334.2	ENSG00000289224	ENSG00000288781		AP002026.1	ENSG00000289535
AP001347.1	AL390957.1	ENSG00000289526	ENSG00000288979		AP003071.3	ENSG00000289924
AP001781.1	AL445183.2	ENSG00000289535	ENSG00000289224		AP003119.3	ENSG00000290041
AP002026.1	AL451123.1	ENSG00000289924	ENSG00000289252		B3GALT5-AS1	ENSG00000290960
AP003071.3	AL583856.2	ENSG00000290041	ENSG00000289526		BASP1-AS1	ENSG00000291105
AP003119.3	AP001056.2	ENSG00000290960	ENSG00000289535		BX323043.1	FENDRR
B3GALT5-AS1	AP001347.1	ENSG00000291105	ENSG00000289924		CASC15	GHET1
BASP1-AS1	AP001781.1	FENDRR	ENSG00000290041		CERS6-AS1	HAGLR
BX323043.1	AP002026.1	GHET1	ENSG00000290960		COPB2-DT	LINC00862
C1QTNF1-AS1	AP003071.3	HAGLR	ENSG00000291105		CYP1B1-AS1	LINC01203
CASC15	AP003119.3	IL6-AS1	FENDRR		DANCR	LINC01415
CERS6-AS1	B3GALT5-AS1	LINC00862	GHET1		DEPTOR-AS1	LINC01588
COPB2-DT	BASP1-AS1	LINC01203	HAGLR		DIO3OS	LINC01605
CYP1B1-AS1	BX323043.1	LINC01415	LINC00862		ENSG00000285569	LINC01638
DANCR	CASC15	LINC01588	LINC01203		ENSG00000285577	LINC01655
DEPTOR-AS1	CEDORA	LINC01605	LINC01415		ENSG00000285848	LINC01705
DIO3OS	CERS6-AS1	LINC01638	LINC01483		ENSG00000285873	LINC02257
ENSG00000285569	COPB2-DT	LINC01655	LINC01588		ENSG00000285999	LINC02454
ENSG00000285577	CYP1B1-AS1	LINC01705	LINC01603		ENSG00000286056	LINC02783
ENSG00000285848	DANCR	LINC02257	LINC01605		ENSG00000286153	LINC02844
ENSG00000285873	DEPTOR-AS1	LINC02454	LINC01638		ENSG00000286289	MIR137HG
ENSG00000285999	DIO3OS	LINC02783	LINC01655		ENSG00000286519	MIR155HG
ENSG00000286056	ENSG00000285569	LINC02844	LINC01705		ENSG00000286633	MYO1B-AS1
ENSG00000286153	ENSG00000285577	MIR137HG	LINC02257		ENSG00000286924	NAV2-AS6
ENSG00000286289	ENSG00000285848	MIR155HG	LINC02454		ENSG00000286989	PGM5P2
ENSG00000286519	ENSG00000285873	MYO1B-AS1	LINC02783		ENSG00000287051	POU2F2-AS1
ENSG00000286633	ENSG00000285999	NAV2-AS6	LINC02844		ENSG00000287106	POU2F2-AS2
ENSG00000286924	ENSG00000286056	PGM5P2	MIR137HG		ENSG00000287255	RGMB-AS1
ENSG00000286989	ENSG00000286153	POU2F2-AS1	MIR155HG		ENSG00000287335	SBF2-AS1
ENSG00000287051	ENSG00000286289	POU2F2-AS2	MYO1B-AS1		ENSG00000287359	TBILA
ENSG00000287106	ENSG00000286519	RGMB-AS1	NAV2-AS6		ENSG00000287430	TGFB2-AS1
ENSG00000287255	ENSG00000286633	SBF2-AS1	PGM5P2		ENSG00000287737	TMEM44-AS2
ENSG00000287335	ENSG00000286649	TBILA	POU2F2-AS1		ENSG00000287824	ZFHX4-AS1
ENSG00000287359	ENSG00000286924	TGFB2-AS1	POU2F2-AS2		ENSG00000288005
ENSG00000287430	ENSG00000286989	TMEM44-AS2	RGMB-AS1		ENSG00000288563
ENSG00000287737	ENSG00000287051	ZFHX4-AS1	SBF2-AS1		ENSG00000288575
ENSG00000287824	ENSG00000287106		TBILA		ENSG00000288735
ENSG00000288005	ENSG00000287255		TGFB2-AS1		ENSG00000288736
ENSG00000288563	ENSG00000287335		TMEM44-AS2		ENSG00000288776
ENSG00000288575	ENSG00000287359		ZFHX4-AS1		ENSG00000288819
ENSG00000288735	ENSG00000287430				ENSG00000288903
ENSG00000288736	ENSG00000287737				ENSG00000288927
ENSG00000288776	ENSG00000287824				ENSG00000289510
ENSG00000288819	ENSG00000288005				ENSG00000290862
ENSG00000288903	ENSG00000288563				ENSG00000291077
ENSG00000288927	ENSG00000288575				ENSG00000291212
ENSG00000289510	ENSG00000288735				FILNC1
ENSG00000290862	ENSG00000288736				FOSL2-AS1
ENSG00000291077	ENSG00000288776				GAS1RR
ENSG00000291212	ENSG00000288819				GCLC-AS1
FILNC1	ENSG00000288903				GRASLND
FOSL2-AS1	ENSG00000288927				HAND2-AS1
GAS1RR	ENSG00000289510				HIF1A-AS1
GCLC-AS1	ENSG00000290862				HS1BP3-IT1
GRASLND	ENSG00000291077				INHBA-AS1
HAND2-AS1	ENSG00000291212				KLHL30-AS1
HIF1A-AS1	FILNC1				LETR1
HS1BP3-IT1	FOSL2-AS1				LINC00545
INHBA-AS1	GAS1RR				LINC00598
KLHL30-AS1	GCLC-AS1				LINC00602
LETR1	GRASLND				LINC00703
LINC00545	HAND2-AS1				LINC00706
LINC00598	HIF1A-AS1				LINC00707
LINC00602	HS1BP3-IT1				LINC00840
LINC00703	IL1R1-AS1				LINC00880
LINC00706	INHBA-AS1				LINC00924
LINC00707	KLHL30-AS1				LINC00957
LINC00840	LETR1				LINC00968
LINC00880	LINC00545				LINC01088
LINC00924	LINC00598				LINC01127
LINC00957	LINC00602				LINC01134
LINC00968	LINC00703				LINC01474
LINC01088	LINC00706				LINC01554
LINC01127	LINC00707				LINC01614
LINC01134	LINC00840				LINC01979
LINC01474	LINC00880				LINC02030
LINC01554	LINC00924				LINC02057
LINC01614	LINC00957				LINC02268
LINC01979	LINC00968				LINC02289
LINC02030	LINC01088				LINC02384
LINC02057	LINC01127				LINC02432
LINC02268	LINC01134				LINC02593
LINC02289	LINC01474				LINC02600
LINC02384	LINC01554				LINC02766
LINC02432	LINC01614				LINC02884
LINC02593	LINC01832				LINC02910
LINC02600	LINC01979				LINC03013
LINC02766	LINC02030				LINC03061
LINC02884	LINC02057				LINC03082
LINC02910	LINC02171				LNC-LBCS
LINC03013	LINC02223				MAP3K14-AS1
LINC03061	LINC02268				MAP3K4-AS1
LINC03082	LINC02289				MYO16-AS1
LNC-LBCS	LINC02349				NAXD-AS1
MAP3K14-AS1	LINC02384				NBAT1
MAP3K4-AS1	LINC02432				PAPPA-AS1
MYO16-AS1	LINC02593				PDE7B-AS1
NAXD-AS1	LINC02600				POM121L9P
NBAT1	LINC02766				PPM1K-DT
PAPPA-AS1	LINC02884				PRR15-DT
PDE7B-AS1	LINC02910				RORB-AS1
POM121L9P	LINC03013				RPL37A-DT
PPM1K-DT	LINC03061				SBNO1-AS1
PRR15-DT	LINC03082				SETBP1-DT
RORB-AS1	LNC-LBCS				SPATA41
RPL37A-DT	MAP3K14-AS1				SPECC1-DT
SBNO1-AS1	MAP3K4-AS1				TSKU-AS1
SETBP1-DT	MYO16-AS1				TTC39C-AS1
SPATA41	NAXD-AS1				VCAN-AS1
SPECC1-DT	NBAT1				WARS2-IT1
TSKU-AS1	PAPPA-AS1
TTC39C-AS1	PDE7B-AS1
VCAN-AS1	POM121L9P
WARS2-IT1	PPM1K-DT
	PRR15-DT
	RORB-AS1
	RPL37A-DT
	SBNO1-AS1
	SETBP1-DT
	SMC2-DT
	SPATA41
	SPECC1-DT
	TSKU-AS1
	TTC39C-AS1
	VCAN-AS1
	WARS2-IT1
	WDR86-AS1

## Sheet: S7
	SYMBOL	ENSEMBLE GeneID	ENSEMBL TranscriptID	Major Transcipt (or Exon)
	AC027288.3	ENSG00000257894	ENST00000549527.1 ENST00000550268.2 ENST00000553165.1	ENST00000550268.2
	AC023154.1	ENSG00000248115	ENST00000508813.1 ENST00000510351.1 ENST00000504048.1	ENST00000510351.1
	AC108861.1	ENSG00000278408	ENST00000611634.1	ENST00000611634.1
	AL121578.3	ENSG00000259977	ENST00000567273.1	ENST00000567273.1
	BASP-AS1	ENSG00000215196	ENST00000667677.1 ENST00000661332.1 ENST00000399760.2 ENST00000665489.1 ENST00000665920.1	ENST00000667677.1 ENST00000399760.2
				(both only EXON 1)
	LINC01605	ENSG00000253161	ENST00000522718.5 ENST00000519738.5 ENST00000520422.5 ENST00000688477.1	ENST00000522718.5
	LINC02432	ENSG00000248810	ENST00000659781.1 ENST00000509161.1 ENST00000701566.1	undetermined
	LINC02593	ENSG00000223764	ENST00000417705.1	ENST00000417705.1
	LINC02600	ENSG00000250986	ENST00000511928.1	ENST00000511928.1

## Sheet: S8
Gene stable ID	HGNC symbol	Log2FC(siNT verses siPGR)	FDR
ENSG00000268895	A1BG-AS1	-0.194256	0.36944
ENSG00000245105	A2M-AS1	-1.12684	0.000274035
ENSG00000242908	AADACL2-AS1	-0.385267	0.696823
ENSG00000215458	AATBC	0.848893	0.26158
ENSG00000243107	AC000120.1	0.333361	0.69551
ENSG00000278727	AC000403.1	0.729189	0.0897757
ENSG00000225498	AC002064.1	0.0592691	0.960593
ENSG00000285090	AC002074.1	0.194792	0.653462
ENSG00000248101	AC002116.1	-0.739921	0.404662
ENSG00000267328	AC002398.2	0.0945694	0.878345
ENSG00000223969	AC002456.1	0.346106	0.666626
ENSG00000272829	AC002470.1	0.377919	0.739037
ENSG00000259810	AC002519.1	-0.0180471	0.987348
ENSG00000276571	AC002550.2	-0.570236	0.483687
ENSG00000275413	AC002553.2	1.20285	0.0789634
ENSG00000262265	AC002558.3	0.0824118	0.919698
ENSG00000236453	AC003092.1	2.91939	2.66635e-31
ENSG00000260793	AC003102.1	0.26054	0.489405
ENSG00000237903	AC004000.1	0.130997	0.892859
ENSG00000273447	AC004067.1	0.892191	0.30925
ENSG00000276449	AC004076.2	0.211659	0.718638
ENSG00000253508	AC004080.2	-1.01739	0.000281465
ENSG00000263272	AC004148.2	-0.532112	0.560579
ENSG00000267666	AC004156.1	-0.272598	0.790385
ENSG00000230333	AC004160.1	-1.31785	4.03816e-06
ENSG00000230435	AC004160.2	-2.06109	0.00359751
ENSG00000274902	AC004241.2	-1.76083	0.0502969
ENSG00000276390	AC004241.3	0.0430328	0.965058
ENSG00000268069	AC004466.1	-0.555691	0.540877
ENSG00000274737	AC004466.2	-0.234941	0.813152
ENSG00000272072	AC004492.1	-0.54858	0.261134
ENSG00000262312	AC004494.1	-0.265256	0.73873
ENSG00000263120	AC004584.3	-0.484883	0.57567
ENSG00000253102	AC004707.1	-0.0807163	0.939627
ENSG00000234203	AC004771.2	-1.27184	0.121047
ENSG00000262227	AC004771.3	-0.300169	0.481934
ENSG00000250132	AC004803.1	-0.405784	0.108832
ENSG00000274818	AC004825.2	0.282248	0.683923
ENSG00000272768	AC004854.2	-0.300595	0.667163
ENSG00000273419	AC004877.1	0.900789	0.233352
ENSG00000272812	AC004908.2	-0.222272	0.740884
ENSG00000273402	AC004908.3	0.165034	0.725193
ENSG00000259209	AC004943.1	0.235412	0.823709
ENSG00000228434	AC004951.1	0.110012	0.88344
ENSG00000271452	AC005034.5	-1.40448	2.62972e-05
ENSG00000183308	AC005037.1	-0.817901	0.329805
ENSG00000272918	AC005070.3	-0.706852	0.130131
ENSG00000272219	AC005072.1	0.0473497	0.970036
ENSG00000226816	AC005082.1	-0.558375	0.40632
ENSG00000267405	AC005180.1	-0.0351608	0.971702
ENSG00000266709	AC005224.4	-0.0877148	0.911211
ENSG00000273314	AC005229.4	0.202417	0.484435
ENSG00000268205	AC005261.1	-0.122197	0.631536
ENSG00000266469	AC005288.1	-0.365427	0.479301
ENSG00000267283	AC005306.1	0.228639	0.806546
ENSG00000248015	AC005329.1	0.0389473	0.959466
ENSG00000267731	AC005332.3	0.315098	0.755011
ENSG00000274561	AC005332.4	-0.303781	0.429231
ENSG00000277476	AC005332.6	-0.570149	0.0398372
ENSG00000278730	AC005332.7	-0.282681	0.0341944
ENSG00000268565	AC005339.1	-0.429703	0.667034
ENSG00000259005	AC005479.1	1.13232	0.0837382
ENSG00000270000	AC005479.2	1.48524	0.0346273
ENSG00000258559	AC005519.1	-0.477308	0.21013
ENSG00000273711	AC005520.5	-0.0617647	0.957025
ENSG00000214719	AC005562.1	0.364534	0.654106
ENSG00000261305	AC005586.2	0.055566	0.939922
ENSG00000272070	AC005618.1	-0.174805	0.64584
ENSG00000261596	AC005632.2	0.998133	0.118174
ENSG00000262050	AC005696.1	-0.681669	0.354807
ENSG00000266126	AC005730.3	0.381952	0.671734
ENSG00000271871	AC005740.4	0.114626	0.918855
ENSG00000266934	AC005746.1	-0.325168	0.734353
ENSG00000274447	AC005790.1	-0.928261	0.26303
ENSG00000265971	AC005828.5	-0.0945153	0.884926
ENSG00000266538	AC005838.2	-0.189661	0.790331
ENSG00000256433	AC005840.2	0.172931	0.847024
ENSG00000266385	AC005899.5	0.40076	0.721435
ENSG00000274341	AC005899.6	0.588611	0.562763
ENSG00000278668	AC005899.7	-0.219794	0.797207
ENSG00000267469	AC005944.1	-0.974805	0.185555
ENSG00000278627	AC005962.1	-0.604903	0.516292
ENSG00000283538	AC005972.4	-0.936824	0.208805
ENSG00000226824	AC006001.2	-0.0827166	0.798368
ENSG00000229591	AC006017.1	0.358456	0.671574
ENSG00000234286	AC006026.3	-0.330372	0.76359
ENSG00000272908	AC006033.2	1.78015	0.032821
ENSG00000261786	AC006058.1	-0.882844	0.0201849
ENSG00000247853	AC006064.2	-0.339235	0.624405
ENSG00000269968	AC006064.4	-0.0218989	0.969182
ENSG00000264895	AC006141.1	0.0853686	0.930191
ENSG00000267058	AC006213.2	-0.384755	0.179888
ENSG00000277806	AC006213.4	-0.298731	0.523679
ENSG00000278492	AC006213.5	-0.461317	0.607723
ENSG00000268460	AC006262.1	-0.230366	0.845032
ENSG00000265784	AC006441.3	-0.807712	0.378066
ENSG00000284052	AC006460.2	1.33007	0.00295558
ENSG00000273448	AC006480.2	-0.736336	0.0262723
ENSG00000261770	AC006504.1	0.0964525	0.851877
ENSG00000281468	AC006504.8	-0.0763121	0.902008
ENSG00000261342	AC006538.1	0.962288	0.0656772
ENSG00000269194	AC006942.1	0.0868394	0.908765
ENSG00000273203	AC006946.2	0.0902041	0.933272
ENSG00000272807	AC007038.2	0.712504	0.0928719
ENSG00000261094	AC007066.2	-0.368772	0.333808
ENSG00000269151	AC007193.3	-0.571268	0.461582
ENSG00000261560	AC007216.3	-0.387623	0.70176
ENSG00000284959	AC007262.2	0.024693	0.981564
ENSG00000269318	AC007292.2	0.366499	0.747221
ENSG00000261997	AC007336.1	0.465418	0.14249
ENSG00000226756	AC007365.1	0.009554	0.991628
ENSG00000272054	AC007390.2	-0.143037	0.746155
ENSG00000261799	AC007406.5	-0.224885	0.237994
ENSG00000275191	AC007497.1	-0.24591	0.830736
ENSG00000244055	AC007566.1	0.0526828	0.884418
ENSG00000255655	AC007570.1	-0.671121	0.45043
ENSG00000260086	AC007611.1	0.70689	0.0277832
ENSG00000255670	AC007619.1	-0.929821	0.107017
ENSG00000242539	AC007620.2	-0.61746	0.513235
ENSG00000256139	AC007637.1	-0.297667	0.719255
ENSG00000273343	AC007663.4	-0.0321825	0.973431
ENSG00000270571	AC007681.1	-0.252196	0.797707
ENSG00000273729	AC007686.3	-0.502221	0.383219
ENSG00000233251	AC007743.1	-1.53961	4.79894e-09
ENSG00000267009	AC007780.1	1.45858	0.00994929
ENSG00000268401	AC007785.3	-0.533948	0.376968
ENSG00000260743	AC007823.1	-0.293136	0.501908
ENSG00000281195	AC007878.1	-0.489616	0.13898
ENSG00000261291	AC007906.1	-0.926229	0.341689
ENSG00000283175	AC007920.2	-0.111795	0.67786
ENSG00000259920	AC007938.1	-1.77888	0.00810951
ENSG00000270953	AC007938.3	-0.383402	0.363088
ENSG00000276651	AC007950.2	-0.963285	0.243576
ENSG00000277534	AC007996.1	-0.303642	0.509091
ENSG00000272369	AC008035.1	0.135324	0.905167
ENSG00000257298	AC008147.2	0.695651	0.0401007
ENSG00000229321	AC008269.1	0.0705051	0.925374
ENSG00000272156	AC008280.3	-0.516389	0.284055
ENSG00000233937	AC008443.1	-0.03877	0.930564
ENSG00000249476	AC008467.1	-0.609833	0.238155
ENSG00000271797	AC008494.3	0.28717	0.74508
ENSG00000279232	AC008522.1	0.444753	0.684516
ENSG00000197332	AC008543.1	1.64769	0.0398356
ENSG00000250362	AC008592.1	1.88735	0.0364603
ENSG00000271737	AC008608.2	-0.285054	0.682178
ENSG00000275719	AC008622.2	-0.294684	0.576045
ENSG00000248544	AC008676.1	-0.208107	0.858298
ENSG00000268108	AC008687.2	1.11042	0.0987687
ENSG00000268743	AC008737.1	-0.0566513	0.940949
ENSG00000269399	AC008764.6	-0.634846	0.414443
ENSG00000279529	AC008764.8	-0.168375	0.787529
ENSG00000267274	AC008770.3	0.00336273	0.997369
ENSG00000250240	AC008840.1	0.351434	0.512536
ENSG00000260751	AC008870.2	0.118079	0.849065
ENSG00000248734	AC008906.1	0.424395	0.396217
ENSG00000262211	AC008914.1	-1.3007	0.136999
ENSG00000260136	AC008915.2	-0.853275	0.0662531
ENSG00000271828	AC008937.3	-2.54835	0.00478061
ENSG00000271926	AC008972.1	-0.513166	0.636578
ENSG00000269688	AC008982.2	0.613663	0.432356
ENSG00000274093	AC009032.1	0.293337	0.66305
ENSG00000276931	AC009041.4	-0.895928	0.098811
ENSG00000261079	AC009053.2	0.267456	0.801868
ENSG00000261783	AC009054.2	0.326757	0.631906
ENSG00000261123	AC009065.5	-0.292049	0.648283
ENSG00000260038	AC009090.1	-0.535192	0.26519
ENSG00000259807	AC009093.1	0.25463	0.466403
ENSG00000260927	AC009107.2	0.365829	0.49943
ENSG00000270020	AC009108.3	0.768876	0.350528
ENSG00000259972	AC009120.2	0.111444	0.721463
ENSG00000263080	AC009121.2	0.71235	0.486685
ENSG00000247121	AC009126.1	0.0207496	0.967699
ENSG00000261765	AC009127.1	0.924232	0.264088
ENSG00000260495	AC009148.1	0.147435	0.89403
ENSG00000261476	AC009163.3	-0.14822	0.893896
ENSG00000274220	AC009163.7	-0.601603	0.375479
ENSG00000261238	AC009166.1	0.380275	0.486069
ENSG00000223725	AC009226.1	1.20276	0.12936
ENSG00000273305	AC009237.15	-0.175647	0.833977
ENSG00000278472	AC009268.2	0.511554	0.533707
ENSG00000259744	AC009269.4	0.0630035	0.934711
ENSG00000273080	AC009309.1	0.145217	0.861161
ENSG00000257176	AC009318.1	-0.44531	0.284765
ENSG00000273680	AC009318.2	0.00207026	0.997478
ENSG00000274315	AC009318.3	-0.107504	0.870127
ENSG00000236255	AC009404.1	0.0816141	0.867234
ENSG00000229195	AC009495.1	-0.733094	0.279095
ENSG00000232411	AC009495.2	0.0493727	0.950281
ENSG00000276261	AC009509.4	1.217	0.0285394
ENSG00000272986	AC009570.1	1.47719	0.102232
ENSG00000251867	AC009812.1	-0.488202	0.226081
ENSG00000263823	AC009831.1	0.600217	0.178657
ENSG00000278840	AC009878.1	0.768983	0.359989
ENSG00000272425	AC009902.3	0.464139	0.646103
ENSG00000270277	AC009948.3	-0.184983	0.667423
ENSG00000270956	AC009948.4	0.0712188	0.893266
ENSG00000269068	AC009955.4	0.413554	0.661395
ENSG00000226266	AC009961.1	0.178774	0.739133
ENSG00000259659	AC009996.1	-0.0293896	0.975153
ENSG00000261019	AC010132.4	-0.701921	0.488681
ENSG00000261324	AC010168.2	0.208529	0.615842
ENSG00000258101	AC010173.1	0.470732	0.558061
ENSG00000257027	AC010186.3	0.250317	0.301267
ENSG00000271327	AC010201.2	0.603313	0.3115
ENSG00000248664	AC010273.1	-1.07027	0.252681
ENSG00000269102	AC010320.3	0.917045	0.338388
ENSG00000276570	AC010327.5	-0.766553	0.166561
ENSG00000214248	AC010336.1	-0.480268	0.38494
ENSG00000251257	AC010457.1	1.00405	0.0589189
ENSG00000269815	AC010463.3	-0.323891	0.769042
ENSG00000270165	AC010530.1	0.619928	0.538744
ENSG00000226180	AC010536.1	1.36461	0.0125508
ENSG00000275734	AC010538.1	0.109383	0.825542
ENSG00000247324	AC010547.1	0.111873	0.928743
ENSG00000269091	AC010624.3	-0.211492	0.837906
ENSG00000283103	AC010642.2	-0.28819	0.252681
ENSG00000277369	AC010654.1	0.85493	0.370928
ENSG00000270574	AC010680.2	-0.514442	0.125102
ENSG00000271011	AC010680.3	-0.04287	0.948278
ENSG00000271141	AC010680.4	-1.05598	0.00340332
ENSG00000261379	AC010735.1	0.359481	0.22664
ENSG00000272622	AC010735.2	0.27915	0.165982
ENSG00000267774	AC010776.2	-1.725	0.0163981
ENSG00000259287	AC010809.1	-0.0840435	0.902008
ENSG00000259408	AC010809.2	-0.244198	0.686348
ENSG00000253854	AC010834.3	-0.035838	0.966998
ENSG00000234936	AC010883.1	-0.226986	0.798291
ENSG00000272702	AC010913.1	0.329036	0.753151
ENSG00000248540	AC010931.2	4.07578	6.24252e-05
ENSG00000269973	AC010969.2	0.329807	0.207493
ENSG00000244151	AC010973.2	-1.07637	0.195399
ENSG00000272789	AC010976.2	0.240191	0.769042
ENSG00000272692	AC010997.4	-0.923335	0.128817
ENSG00000271795	AC011337.1	0.0762256	0.936088
ENSG00000272112	AC011374.2	0.20346	0.71435
ENSG00000250069	AC011379.1	-0.063508	0.954532
ENSG00000254363	AC011379.2	-0.241697	0.801534
ENSG00000283897	AC011416.3	0.685817	0.397266
ENSG00000269246	AC011445.2	0.210683	0.833649
ENSG00000267383	AC011447.3	0.440009	0.419866
ENSG00000197813	AC011450.1	-0.196826	0.737975
ENSG00000283108	AC011451.3	1.07541	0.13255
ENSG00000277744	AC011462.4	-0.996873	0.270328
ENSG00000268583	AC011466.1	-0.738137	0.352001
ENSG00000260160	AC011468.1	0.517593	0.127353
ENSG00000275055	AC011468.5	-0.195074	0.820862
ENSG00000267082	AC011472.1	-0.847352	0.354746
ENSG00000267174	AC011472.2	1.82462	0.00011369
ENSG00000267481	AC011477.2	0.574747	0.112807
ENSG00000269653	AC011479.3	0.564353	0.576773
ENSG00000267114	AC011481.1	-0.418146	0.70147
ENSG00000269289	AC011503.1	-3.22065	8.70799e-55
ENSG00000269397	AC011503.2	-0.463883	0.584966
ENSG00000254362	AC011726.3	1.30867	0.174576
ENSG00000268573	AC011815.1	-0.738818	0.0969658
ENSG00000274184	AC011815.2	-0.861015	0.363102
ENSG00000279145	AC011912.1	0.818429	0.0711262
ENSG00000275638	AC011939.3	-0.0754433	0.949349
ENSG00000261542	AC011978.2	-0.581346	0.461186
ENSG00000279277	AC012020.1	0.524935	0.580818
ENSG00000269976	AC012065.3	-0.0443439	0.953761
ENSG00000270100	AC012065.4	-1.2508	0.0776495
ENSG00000271936	AC012073.1	0.284135	0.716071
ENSG00000260350	AC012173.1	-1.48374	0.0683421
ENSG00000261114	AC012181.1	0.250852	0.769042
ENSG00000261270	AC012181.2	1.08467	0.25166
ENSG00000272667	AC012306.2	-0.198022	0.587416
ENSG00000268049	AC012313.2	0.364787	0.205429
ENSG00000268912	AC012313.5	-0.653368	0.0653752
ENSG00000203327	AC012358.1	0.0204078	0.975986
ENSG00000240401	AC012358.3	-0.300111	0.723653
ENSG00000272861	AC012360.2	-0.401561	0.700746
ENSG00000277135	AC012409.3	0.433004	0.216704
ENSG00000260409	AC012414.5	0.82958	0.105838
ENSG00000271976	AC012467.2	-0.321956	0.110695
ENSG00000260163	AC012508.1	1.0297	0.295618
ENSG00000260597	AC012531.1	-0.0662389	0.933135
ENSG00000271843	AC012557.1	0.333003	0.720498
ENSG00000261526	AC012615.1	-0.256858	0.611606
ENSG00000267053	AC012617.1	0.00235893	0.998782
ENSG00000271980	AC012640.4	-0.216201	0.810818
ENSG00000274719	AC012653.2	0.762101	0.217672
ENSG00000272148	AC013403.2	-0.960013	0.00448246
ENSG00000258976	AC013451.2	0.476069	0.653721
ENSG00000229727	AC013460.1	1.66529	0.0596434
ENSG00000259345	AC013652.1	-0.153081	0.875788
ENSG00000232386	AC015712.1	-1.25508	0.128277
ENSG00000278456	AC015712.7	0.783184	0.42971
ENSG00000270091	AC015726.1	0.536675	0.170943
ENSG00000267546	AC015802.4	-0.221672	0.826643
ENSG00000264112	AC015813.1	-0.456603	0.0135801
ENSG00000260907	AC015818.2	0.61722	0.228528
ENSG00000278600	AC015871.3	0.0249712	0.949093
ENSG00000249406	AC015909.1	0.375879	0.505844
ENSG00000276855	AC015922.4	1.05532	1.61389e-10
ENSG00000093100	AC016026.1	-0.147313	0.86321
ENSG00000227540	AC016394.1	0.077124	0.914931
ENSG00000272599	AC016394.2	0.166964	0.845471
ENSG00000272384	AC016405.3	-3.16512	0.000979905
ENSG00000268670	AC016586.1	0.512205	0.396234
ENSG00000282393	AC016588.2	1.00891	0.233569
ENSG00000267682	AC016590.2	0.0429183	0.960636
ENSG00000276846	AC016590.3	-0.495359	0.479799
ENSG00000271151	AC016737.1	-0.636615	0.472503
ENSG00000271204	AC016831.5	0.668334	0.195613
ENSG00000229625	AC016877.1	-0.930348	0.196038
ENSG00000271930	AC016877.3	-1.06475	0.000494713
ENSG00000230732	AC016949.1	0.450658	0.357542
ENSG00000276136	AC016957.2	-0.453526	0.585008
ENSG00000271947	AC017076.1	0.510804	0.653976
ENSG00000273275	AC017083.2	-0.525383	0.485816
ENSG00000259985	AC017100.1	-0.257647	0.698102
ENSG00000224376	AC017104.1	0.627375	0.234836
ENSG00000241679	AC018450.1	-1.1118	0.0176109
ENSG00000271344	AC018638.6	0.154435	0.878345
ENSG00000271553	AC018638.7	-0.150184	0.835362
ENSG00000273014	AC018645.2	0.0447988	0.909581
ENSG00000273306	AC018690.1	0.339729	0.492335
ENSG00000275393	AC018695.6	-0.100261	0.915065
ENSG00000269982	AC018809.2	0.0602973	0.921624
ENSG00000277548	AC018926.3	0.0167428	0.98113
ENSG00000213963	AC019080.1	0.235964	0.404662
ENSG00000272777	AC019131.2	-0.766847	0.066376
ENSG00000269210	AC019171.1	0.302734	0.68248
ENSG00000264666	AC020558.1	-1.76937	0.000126576
ENSG00000273123	AC020634.1	0.20141	0.83632
ENSG00000251161	AC020661.1	1.1177	0.0760337
ENSG00000275056	AC020663.3	-0.33579	0.726266
ENSG00000274104	AC020910.4	-0.0203713	0.981564
ENSG00000262514	AC020978.6	-0.827491	0.390293
ENSG00000263276	AC020978.7	1.1089	0.0996314
ENSG00000261338	AC021016.2	0.310924	0.43838
ENSG00000273361	AC021016.3	-0.33134	0.764564
ENSG00000230551	AC021078.1	-0.0678921	0.732758
ENSG00000260774	AC021087.3	-0.13443	0.879257
ENSG00000272661	AC021097.1	0.421977	0.299768
ENSG00000230747	AC021188.1	-0.572913	0.556662
ENSG00000273007	AC021205.3	-1.02984	0.110351
ENSG00000275897	AC021491.4	-0.858256	0.385723
ENSG00000267313	AC021504.1	0.479025	0.587308
ENSG00000267506	AC021683.2	-1.38992	0.0957868
ENSG00000259407	AC021739.2	-1.8812	0.00933551
ENSG00000273674	AC021752.1	0.510792	0.605536
[truncated: 3,197 more rows]

## Sheet: S9
NP/P Decidualization UP and siPGR DOWN	NP/P Decidualization Down and siPGR UP	NP/P Decidualization UP and siPGR UP
[truncated: 22 more rows]

[truncated: 2 more sheets: S10, S11]
